# Supplementary material for: Rhodium nanospheres for ultraviolet and visible plasmonics
Source: Royal Society of Chemistry journal article supplement (doi:10.1039/d4nh00449c), 2024-11-04
Supplement: d4nh00449c1.xlsx [file d4nh00449c1.xlsx]

## Sheet: Figure 1B
				Wavenumber	Absorbance	Absorbance
				cm -1	a.u.	a.u.
					MPA-Rh NPs	PEG-Rh NPs
				500.44	0.01254	0.07555
				501.41	0.01188	0.07551
				502.37	0.01354	0.07608
				503.33	0.01465	0.07611
				504.3	0.01333	0.07568
				505.26	0.01287	0.07554
				506.23	0.01316	0.07557
				507.19	0.01281	0.07531
				508.15	0.01284	0.07537
				509.12	0.01418	0.07572
				510.08	0.01406	0.07579
				511.05	0.01323	0.07552
				512.01	0.01336	0.07572
				512.98	0.01482	0.07586
				513.94	0.01607	0.0758
				514.9	0.01448	0.07552
				515.87	0.013	0.07534
				516.83	0.01355	0.07545
				517.8	0.0149	0.07596
				518.76	0.01586	0.0762
				519.73	0.01487	0.07583
				520.69	0.01452	0.0755
				521.65	0.01575	0.07608
				522.62	0.01557	0.07619
				523.58	0.01521	0.07602
				524.55	0.01464	0.07605
				525.51	0.01367	0.0759
				526.48	0.01345	0.07584
				527.44	0.01485	0.07633
				528.4	0.01503	0.07629
				529.37	0.01505	0.07635
				530.33	0.01551	0.07635
				531.3	0.01501	0.0757
				532.26	0.0131	0.07498
				533.23	0.01264	0.07511
				534.19	0.01345	0.07551
				535.15	0.01433	0.07554
				536.12	0.01402	0.07514
				537.08	0.01245	0.0747
				538.05	0.01223	0.07462
				539.01	0.01289	0.07481
				539.98	0.01376	0.07485
				540.94	0.01324	0.07463
				541.9	0.01223	0.0743
				542.87	0.01218	0.07421
				543.83	0.01191	0.07417
				544.8	0.01131	0.07412
				545.76	0.01192	0.07413
				546.73	0.01183	0.07404
				547.69	0.01191	0.07413
				548.65	0.01227	0.07439
				549.62	0.01152	0.07449
				550.58	0.01091	0.07442
				551.55	0.01054	0.07427
				552.51	0.0113	0.07445
				553.47	0.01171	0.07468
				554.44	0.0103	0.07443
				555.4	0.00877	0.074
				556.37	0.0091	0.07409
				557.33	0.00995	0.07436
				558.3	0.00944	0.07445
				559.26	0.0094	0.07437
				560.22	0.00952	0.07445
				561.19	0.00964	0.07449
				562.15	0.00897	0.0742
				563.12	0.00848	0.07407
				564.08	0.00784	0.07396
				565.05	0.00738	0.07398
				566.01	0.00791	0.07436
				566.97	0.00777	0.07463
				567.94	0.00708	0.07453
				568.9	0.00671	0.07419
				569.87	0.00654	0.07409
				570.83	0.00724	0.07432
				571.8	0.00709	0.07438
				572.76	0.00644	0.07427
				573.72	0.00651	0.07436
				574.69	0.00622	0.0743
				575.65	0.0059	0.07428
				576.62	0.00667	0.07428
				577.58	0.00698	0.07439
				578.55	0.00671	0.0745
				579.51	0.00683	0.0746
				580.47	0.00672	0.07498
				581.44	0.00605	0.07503
				582.4	0.00504	0.07466
				583.37	0.0049	0.07456
				584.33	0.00516	0.07478
				585.3	0.00486	0.0747
				586.26	0.00535	0.07484
				587.22	0.00525	0.07479
				588.19	0.00485	0.07452
				589.15	0.00388	0.07457
				590.12	0.0039	0.07444
				591.08	0.00447	0.07439
				592.04	0.00446	0.07444
				593.01	0.00394	0.07447
				593.97	0.00384	0.07451
				594.94	0.0044	0.07462
				595.9	0.00492	0.07451
				596.87	0.00489	0.07442
				597.83	0.00444	0.07441
				598.79	0.00429	0.07443
				599.76	0.00421	0.07464
				600.72	0.00368	0.07465
				601.69	0.0033	0.07459
				602.65	0.00382	0.07457
				603.62	0.00358	0.0745
				604.58	0.00335	0.07445
				605.54	0.00352	0.0745
				606.51	0.0033	0.07459
				607.47	0.0029	0.07449
				608.44	0.00298	0.07453
				609.4	0.00272	0.07441
				610.37	0.00255	0.07429
				611.33	0.00277	0.07435
				612.29	0.003	0.07419
				613.26	0.00303	0.07417
				614.22	0.00283	0.07416
				615.19	0.00214	0.07395
				616.15	0.00279	0.07412
				617.12	0.00319	0.07418
				618.08	0.00286	0.07403
				619.04	0.00208	0.07399
				620.01	0.00203	0.07409
				620.97	0.00252	0.07428
				621.94	0.00267	0.07448
				622.9	0.0031	0.0745
				623.87	0.00285	0.0741
				624.83	0.0026	0.07386
				625.79	0.00308	0.07429
				626.76	0.00273	0.07456
				627.72	0.00215	0.07444
				628.69	0.00228	0.07437
				629.65	0.00283	0.07439
				630.61	0.00286	0.07449
				631.58	0.00246	0.07454
				632.54	0.00213	0.07441
				633.51	0.00206	0.07452
				634.47	0.00232	0.0749
				635.44	0.00218	0.07489
				636.4	0.00188	0.07467
				637.36	0.00163	0.07468
				638.33	0.00158	0.0748
				639.29	0.00229	0.07492
				640.26	0.002	0.07496
				641.22	0.00158	0.07494
				642.19	0.000826178	0.07476
				643.15	0.000578552	0.07465
				644.11	0.0011	0.07474
				645.08	0.00163	0.07501
				646.04	0.00143	0.07511
				647.01	0.00115	0.07519
				647.97	0.000849296	0.07521
				648.94	0.00111	0.07526
				649.9	0.00181	0.07533
				650.86	0.00175	0.07529
				651.83	0.00133	0.07539
				652.79	0.00169	0.07551
				653.76	0.00184	0.07554
				654.72	0.00156	0.07546
				655.69	0.00163	0.07536
				656.65	0.00174	0.07527
				657.61	0.00232	0.07531
				658.58	0.00288	0.07557
				659.54	0.00271	0.07564
				660.51	0.0025	0.07575
				661.47	0.00243	0.07569
				662.44	0.0024	0.07557
				663.4	0.00207	0.0756
				664.36	0.002	0.0757
				665.33	0.00193	0.07579
				666.29	0.00135	0.0759
				667.26	7.11508e-05	0.07586
				668.22	-8.89642e-05	0.07578
				669.18	0.00141	0.07593
				670.15	0.00248	0.07617
				671.11	0.00284	0.07639
				672.08	0.00256	0.07625
				673.04	0.00238	0.07612
				674.01	0.0023	0.07622
				674.97	0.00215	0.07622
				675.93	0.00235	0.0761
				676.9	0.00235	0.07612
				677.86	0.00222	0.07622
				678.83	0.00289	0.07633
				679.79	0.00354	0.07654
				680.76	0.00344	0.07661
				681.72	0.00295	0.07655
				682.68	0.00338	0.07648
				683.65	0.0036	0.0765
				684.61	0.00338	0.0765
				685.58	0.00372	0.07662
				686.54	0.00395	0.0767
				687.51	0.00402	0.07651
				688.47	0.00401	0.07658
				689.43	0.00381	0.07668
				690.4	0.00361	0.07678
				691.36	0.0036	0.07671
				692.33	0.00325	0.07656
				693.29	0.00349	0.07665
				694.26	0.00352	0.07676
				695.22	0.00335	0.07679
				696.18	0.00378	0.07683
				697.15	0.00396	0.07679
				698.11	0.0038	0.07683
				699.08	0.0037	0.07682
				700.04	0.00342	0.07688
				701.01	0.00339	0.07695
				701.97	0.00346	0.0768
				702.93	0.00358	0.07689
				703.9	0.00383	0.07705
				704.86	0.00335	0.077
				705.83	0.00255	0.07694
				706.79	0.00251	0.07703
				707.75	0.00288	0.0771
				708.72	0.00284	0.07713
				709.68	0.00272	0.07713
				710.65	0.00258	0.07714
				711.61	0.00212	0.07722
				712.58	0.00173	0.07731
				713.54	0.0018	0.07728
				714.5	0.00189	0.0773
				715.47	0.00179	0.07742
				716.43	0.00164	0.07749
				717.4	0.00177	0.07756
				718.36	0.00178	0.0777
				719.33	0.00198	0.07773
				720.29	0.00221	0.0778
				721.25	0.00233	0.078
				722.22	0.00186	0.07795
				723.18	0.00145	0.07772
				724.15	0.00165	0.07771
				725.11	0.00136	0.07764
				726.08	0.00105	0.07756
				727.04	0.00143	0.07767
				728	0.00171	0.07779
				728.97	0.00201	0.07777
				729.93	0.00218	0.07785
				730.9	0.00238	0.07801
				731.86	0.00239	0.07807
				732.83	0.00237	0.07808
				733.79	0.0024	0.07807
				734.75	0.0027	0.07824
				735.72	0.00304	0.07832
				736.68	0.00327	0.0782
				737.65	0.00337	0.0782
				738.61	0.00334	0.07839
				739.58	0.0037	0.07862
				740.54	0.004	0.07867
				741.5	0.00405	0.07856
				742.47	0.00426	0.07858
				743.43	0.00446	0.07865
				744.4	0.00484	0.07869
				745.36	0.00538	0.07896
				746.32	0.00599	0.07907
				747.29	0.00605	0.07901
				748.25	0.00602	0.07906
				749.22	0.00624	0.07909
				750.18	0.00682	0.07926
				751.15	0.00724	0.07939
				752.11	0.00734	0.0794
				753.07	0.00787	0.07943
				754.04	0.00837	0.07948
				755	0.00863	0.07962
				755.97	0.00892	0.07971
				756.93	0.00903	0.07974
				757.9	0.00913	0.07971
				758.86	0.00912	0.07963
				759.82	0.00923	0.0798
				760.79	0.00959	0.08005
				761.75	0.00956	0.08017
				762.72	0.00936	0.0802
				763.68	0.00956	0.0803
				764.65	0.00988	0.08043
				765.61	0.01028	0.08065
				766.57	0.01055	0.08074
				767.54	0.01063	0.08075
				768.5	0.01092	0.08085
				769.47	0.01149	0.08103
				770.43	0.01226	0.08109
				771.4	0.01268	0.08117
				772.36	0.01333	0.08137
				773.32	0.01405	0.08158
				774.29	0.01492	0.08173
				775.25	0.01597	0.08184
				776.22	0.01687	0.08208
				777.18	0.01756	0.08226
				778.14	0.01847	0.08232
				779.11	0.01977	0.08248
				780.07	0.02131	0.08271
				781.04	0.02265	0.08283
				782	0.02402	0.08296
				782.97	0.02576	0.08312
				783.93	0.02737	0.08329
				784.89	0.02939	0.08351
				785.86	0.03154	0.08384
				786.82	0.03362	0.08413
				787.79	0.03576	0.08427
				788.75	0.0378	0.08444
				789.72	0.03989	0.08466
				790.68	0.04186	0.08486
				791.64	0.04395	0.08507
				792.61	0.04615	0.08535
				793.57	0.04795	0.0857
				794.54	0.0491	0.08594
				795.5	0.05031	0.08609
				796.47	0.05174	0.08619
				797.43	0.05305	0.08641
				798.39	0.05362	0.08652
				799.36	0.05367	0.08657
				800.32	0.05376	0.08672
				801.29	0.05364	0.08673
				802.25	0.05347	0.08673
				803.22	0.05322	0.08669
				804.18	0.05247	0.08672
				805.14	0.05097	0.0866
				806.11	0.04943	0.08635
				807.07	0.04811	0.08628
				808.04	0.04659	0.08631
				809	0.04438	0.08633
				809.97	0.04244	0.08644
				810.93	0.04091	0.08654
				811.89	0.03933	0.08655
				812.86	0.03758	0.08656
				813.82	0.03614	0.0866
				814.79	0.03498	0.08673
				815.75	0.03368	0.08677
				816.72	0.03253	0.08692
				817.68	0.03184	0.08724
				818.64	0.03089	0.08743
				819.61	0.02952	0.08754
				820.57	0.02801	0.08775
				821.54	0.02635	0.08799
				822.5	0.02436	0.08826
				823.46	0.02217	0.08847
				824.43	0.02017	0.08872
				825.39	0.01841	0.0891
				826.36	0.01675	0.08954
				827.32	0.01536	0.08981
				828.29	0.01395	0.08999
				829.25	0.01275	0.09025
				830.21	0.01223	0.09058
				831.18	0.01216	0.09089
				832.14	0.01194	0.09121
				833.11	0.01183	0.09169
				834.07	0.01192	0.09245
				835.04	0.0124	0.09334
				836	0.01299	0.09449
				836.96	0.01323	0.09598
				837.93	0.01368	0.09805
				838.89	0.01427	0.10054
				839.86	0.01436	0.10319
				840.82	0.01454	0.10519
				841.79	0.01507	0.10555
				842.75	0.01568	0.10417
				843.71	0.01628	0.10164
				844.68	0.01627	0.09868
				845.64	0.0161	0.096
				846.61	0.01588	0.09367
				847.57	0.01584	0.09167
				848.54	0.01591	0.09003
				849.5	0.01566	0.08877
				850.46	0.01527	0.08796
				851.43	0.01495	0.08749
				852.39	0.01477	0.08722
				853.36	0.01445	0.087
				854.32	0.01452	0.08701
				855.28	0.01477	0.08709
				856.25	0.01495	0.08691
				857.21	0.01494	0.08672
				858.18	0.01508	0.08665
				859.14	0.01544	0.08662
				860.11	0.0158	0.08659
				861.07	0.01623	0.08655
				862.03	0.01653	0.08643
				863	0.01644	0.08638
				863.96	0.01613	0.08635
				864.93	0.01596	0.08639
				865.89	0.01578	0.08645
				866.86	0.01548	0.0864
				867.82	0.0149	0.0864
				868.78	0.01419	0.08647
				869.75	0.01393	0.08657
				870.71	0.01342	0.08659
				871.68	0.01277	0.0866
				872.64	0.01234	0.08671
				873.61	0.01143	0.08671
				874.57	0.01051	0.08676
				875.53	0.00996	0.08686
				876.5	0.00964	0.087
				877.46	0.00931	0.08711
				878.43	0.00879	0.08711
				879.39	0.00842	0.08707
				880.36	0.00795	0.08715
				881.32	0.00753	0.08724
				882.28	0.00732	0.08732
				883.25	0.0071	0.08738
				884.21	0.00677	0.08747
				885.18	0.0066	0.08763
				886.14	0.00673	0.0878
				887.11	0.00684	0.08786
				888.07	0.00699	0.08797
				889.03	0.0071	0.08812
				890	0.00686	0.0882
				890.96	0.00674	0.08817
				891.93	0.00662	0.08823
				892.89	0.00663	0.08841
				893.85	0.0068	0.0886
				894.82	0.007	0.08875
				895.78	0.00708	0.08888
				896.75	0.00723	0.08907
				897.71	0.00734	0.08921
				898.68	0.00741	0.08935
				899.64	0.00746	0.08945
				900.6	0.00766	0.08962
				901.57	0.00798	0.08992
				902.53	0.008	0.09006
				903.5	0.00812	0.09015
				904.46	0.00832	0.09035
				905.43	0.00833	0.09053
				906.39	0.00851	0.09063
				907.35	0.00906	0.09082
				908.32	0.0093	0.09097
				909.28	0.00926	0.09109
				910.25	0.00929	0.09121
				911.21	0.00926	0.09132
				912.18	0.00944	0.09155
				913.14	0.00972	0.09176
				914.1	0.01012	0.09196
				915.07	0.01036	0.0921
				916.03	0.01051	0.09224
				917	0.01056	0.09242
				917.96	0.01027	0.09264
				918.93	0.01046	0.09286
				919.89	0.0108	0.09307
				920.85	0.01077	0.09326
				921.82	0.01097	0.09358
				922.78	0.01113	0.09385
				923.75	0.01112	0.09412
				924.71	0.01115	0.09437
				925.68	0.01123	0.09458
				926.64	0.0113	0.09482
				927.6	0.01152	0.095
				928.57	0.0118	0.09512
				929.53	0.01196	0.09534
				930.5	0.0119	0.09567
				931.46	0.01191	0.09602
				932.42	0.01189	0.09628
				933.39	0.01184	0.09643
				934.35	0.01199	0.09652
				935.32	0.01221	0.09677
				936.28	0.01227	0.09706
				937.25	0.01229	0.09742
				938.21	0.01214	0.0978
				939.17	0.01217	0.09828
				940.14	0.01235	0.09881
				941.1	0.01256	0.09936
				942.07	0.01276	0.09997
				943.03	0.01293	0.10053
				944	0.01323	0.10105
				944.96	0.01342	0.10134
				945.92	0.01348	0.10139
				946.89	0.01353	0.10124
				947.85	0.01371	0.10091
				948.82	0.0139	0.10043
				949.78	0.01417	0.10003
				950.75	0.01436	0.09973
				951.71	0.01443	0.09947
				952.67	0.01459	0.09937
				953.64	0.01472	0.0994
				954.6	0.01499	0.09949
				955.57	0.01511	0.09964
				956.53	0.01532	0.09981
				957.5	0.01551	0.09988
				958.46	0.01582	0.09992
				959.42	0.01599	0.10003
				960.39	0.01592	0.10025
				961.35	0.01598	0.10041
				962.32	0.01617	0.1001
				963.28	0.01622	0.09891
				964.25	0.01629	0.0971
				965.21	0.0165	0.09505
				966.17	0.01672	0.09318
				967.14	0.01679	0.09186
				968.1	0.0168	0.09108
				969.07	0.0169	0.09071
				970.03	0.01725	0.09063
				970.99	0.0176	0.09074
				971.96	0.0177	0.09088
				972.92	0.01766	0.09105
				973.89	0.01775	0.09127
				974.85	0.01809	0.09147
				975.82	0.01871	0.09164
				976.78	0.019	0.09188
				977.74	0.01915	0.09212
				978.71	0.01943	0.09231
				979.67	0.01988	0.09251
				980.64	0.02045	0.0927
				981.6	0.02057	0.0928
				982.57	0.02076	0.09302
				983.53	0.02109	0.09323
				984.49	0.02152	0.0934
				985.46	0.02191	0.09357
				986.42	0.02234	0.09372
				987.39	0.0228	0.09394
				988.35	0.023	0.0941
				989.32	0.02325	0.09421
				990.28	0.02394	0.09438
				991.24	0.0248	0.09455
				992.21	0.0255	0.09472
				993.17	0.02604	0.09486
				994.14	0.02661	0.09498
				995.1	0.0274	0.09512
				996.07	0.02826	0.09533
				997.03	0.02915	0.09547
				997.99	0.03024	0.09555
				998.96	0.03117	0.09566
				999.92	0.03211	0.09581
				1000.8	0.03333	0.09605
				1001.8	0.0347	0.09628
				1002.8	0.03602	0.09649
				1003.7	0.03735	0.09668
				1004.7	0.03851	0.09685
				1005.7	0.03969	0.09706
				1006.6	0.04119	0.09727
				1007.6	0.04277	0.09748
				1008.6	0.04419	0.09762
				1009.5	0.04559	0.09783
				1010.5	0.04696	0.09811
				1011.4	0.04825	0.09836
				1012.4	0.04915	0.09854
				1013.4	0.04999	0.09863
				1014.3	0.05074	0.09879
				1015.3	0.05111	0.09897
				1016.3	0.05138	0.0991
				1017.2	0.05186	0.09926
				1018.2	0.05212	0.09947
				1019.2	0.05212	0.09964
				1020.1	0.05224	0.09987
				1021.1	0.05208	0.10006
				1022.1	0.05173	0.10027
				1023	0.05133	0.10046
				1024	0.05109	0.10061
				1024.9	0.05092	0.10087
				1025.9	0.05071	0.1011
				1026.9	0.05047	0.10124
				1027.8	0.05015	0.1014
				1028.8	0.04962	0.10149
				1029.8	0.04942	0.10162
				1030.7	0.04926	0.10177
				1031.7	0.04884	0.1019
				1032.7	0.04873	0.10202
				1033.6	0.04865	0.10209
				1034.6	0.04829	0.10219
				1035.6	0.04792	0.10224
				1036.5	0.04783	0.10235
				1037.5	0.0478	0.10249
				1038.4	0.04764	0.10254
				1039.4	0.04755	0.10261
				1040.4	0.04734	0.10271
				1041.3	0.04715	0.10275
				1042.3	0.04716	0.1028
				1043.3	0.04707	0.10285
				1044.2	0.0469	0.10291
				1045.2	0.04666	0.10307
				1046.2	0.0467	0.10325
				1047.1	0.04679	0.10345
				1048.1	0.04687	0.10379
				1049.1	0.04692	0.10415
				1050	0.04693	0.10452
				1051	0.04706	0.10496
				1051.9	0.04741	0.10556
				1052.9	0.04754	0.10626
				1053.9	0.04737	0.10707
				1054.8	0.0475	0.10807
				1055.8	0.04777	0.10937
				1056.8	0.048	0.11087
				1057.7	0.0481	0.11249
				1058.7	0.04819	0.11417
				1059.7	0.0484	0.11541
				1060.6	0.04858	0.11558
				1061.6	0.0488	0.11421
				1062.6	0.04914	0.11187
				1063.5	0.04932	0.10962
				1064.5	0.04948	0.10807
				1065.4	0.04971	0.10724
				1066.4	0.04996	0.10698
				1067.4	0.04997	0.10689
				1068.3	0.04997	0.10697
				1069.3	0.05032	0.10723
				1070.3	0.05068	0.10748
				1071.2	0.05094	0.10783
				1072.2	0.05115	0.10824
				1073.2	0.05139	0.10863
				1074.1	0.05173	0.10906
				1075.1	0.05209	0.10955
				1076.1	0.0523	0.11006
				1077	0.05246	0.11062
				1078	0.05249	0.11124
				1078.9	0.05276	0.11197
				1079.9	0.05301	0.11274
				1080.9	0.05317	0.11347
				1081.8	0.05329	0.11413
				1082.8	0.05351	0.11479
				1083.8	0.05382	0.11558
				1084.7	0.05404	0.11635
				1085.7	0.05381	0.117
				1086.7	0.05364	0.11772
				1087.6	0.05361	0.11852
				1088.6	0.05346	0.11929
				1089.6	0.05326	0.12013
				1090.5	0.05312	0.12112
				1091.5	0.05287	0.12218
				1092.4	0.05231	0.12334
				1093.4	0.05172	0.12461
				1094.4	0.05117	0.12595
				1095.3	0.05045	0.12733
				1096.3	0.04978	0.12883
				1097.3	0.049	0.1304
				1098.2	0.048	0.13196
				1099.2	0.04686	0.13345
				1100.2	0.04566	0.13492
				1101.1	0.04444	0.13639
				1102.1	0.0433	0.13772
				1103.1	0.04213	0.1389
				1104	0.04053	0.13993
				1105	0.03872	0.14097
				1105.9	0.03708	0.14205
				1106.9	0.03538	0.14291
				1107.9	0.03366	0.14322
				1108.8	0.03193	0.1428
				1109.8	0.03014	0.14177
				1110.8	0.02847	0.14064
				1111.7	0.02697	0.13972
				1112.7	0.02558	0.1387
				1113.7	0.02416	0.13723
				1114.6	0.02265	0.13497
				1115.6	0.0212	0.13201
				1116.6	0.01981	0.12857
				1117.5	0.01853	0.12508
				1118.5	0.0173	0.12186
				1119.4	0.01631	0.11901
				1120.4	0.0153	0.11632
				1121.4	0.0144	0.11347
				1122.3	0.01356	0.11004
				1123.3	0.01268	0.10595
				1124.3	0.01188	0.10157
				1125.2	0.01109	0.09739
				1126.2	0.01048	0.09389
				1127.2	0.01008	0.09112
				1128.1	0.00957	0.08914
				1129.1	0.00905	0.0879
				1130.1	0.00859	0.08718
				1131	0.00827	0.08683
				1132	0.00793	0.08667
				1132.9	0.00774	0.08668
				1133.9	0.00754	0.08685
				1134.9	0.00717	0.08715
				1135.8	0.00686	0.08757
				1136.8	0.00652	0.08823
				1137.8	0.00627	0.08914
				1138.7	0.00593	0.09027
				1139.7	0.00546	0.09156
				1140.7	0.00516	0.09301
				1141.6	0.00511	0.09445
				1142.6	0.00505	0.09551
				1143.6	0.00478	0.09581
				1144.5	0.00448	0.09561
				1145.5	0.00428	0.09538
				1146.4	0.0042	0.09532
				1147.4	0.00414	0.09527
				1148.4	0.00411	0.09495
				1149.3	0.00407	0.09405
				1150.3	0.00402	0.09205
				1151.3	0.00391	0.08907
				1152.2	0.00384	0.08583
				1153.2	0.00397	0.08314
				1154.2	0.00409	0.08118
				1155.1	0.00401	0.07976
				1156.1	0.00383	0.07875
				1157.1	0.00389	0.07807
				1158	0.00401	0.07767
				1159	0.00399	0.07739
				1159.9	0.0041	0.07722
				1160.9	0.00417	0.07712
				1161.9	0.00433	0.0771
				1162.8	0.00458	0.07715
				1163.8	0.00469	0.07718
				1164.8	0.00476	0.07721
				1165.7	0.00479	0.07727
				1166.7	0.00485	0.07735
				1167.7	0.00494	0.07745
				1168.6	0.00497	0.07756
				1169.6	0.00507	0.07767
				1170.6	0.00514	0.07781
				1171.5	0.00542	0.07802
				1172.5	0.00571	0.07818
				1173.4	0.00584	0.07836
				1174.4	0.00603	0.07859
				1175.4	0.00606	0.07878
				1176.3	0.00599	0.07897
				1177.3	0.00613	0.07914
				1178.3	0.00615	0.07922
				1179.2	0.0063	0.07937
				1180.2	0.00641	0.07953
				1181.2	0.00626	0.07958
				1182.1	0.00618	0.07963
				1183.1	0.00639	0.07974
				1184	0.00665	0.07991
				1185	0.0067	0.08009
				1186	0.00648	0.08019
				1186.9	0.00639	0.08031
				1187.9	0.00651	0.08049
				1188.9	0.00669	0.08064
				1189.8	0.00664	0.08076
				1190.8	0.00657	0.08093
				1191.8	0.00656	0.08107
				1192.7	0.00654	0.08123
				1193.7	0.00651	0.08136
				1194.7	0.00643	0.08147
				1195.6	0.00626	0.08154
				1196.6	0.00617	0.08159
				1197.5	0.00609	0.08168
				1198.5	0.00596	0.08173
				1199.5	0.00604	0.08183
				1200.4	0.00614	0.08191
				1201.4	0.00599	0.08189
				1202.4	0.00585	0.08195
				1203.3	0.0058	0.08207
				1204.3	0.00586	0.08213
				1205.3	0.00592	0.08219
				1206.2	0.00593	0.08229
				1207.2	0.00587	0.08243
				1208.2	0.00582	0.08258
				1209.1	0.00576	0.08268
				1210.1	0.00567	0.08286
				1211	0.0056	0.08302
				1212	0.00557	0.08318
				1213	0.00565	0.08338
				1213.9	0.00565	0.08355
				1214.9	0.00563	0.08372
				1215.9	0.00556	0.08389
				1216.8	0.00561	0.08403
				1217.8	0.00579	0.0842
				1218.8	0.00574	0.08441
				1219.7	0.00572	0.08462
				1220.7	0.00579	0.08485
				1221.7	0.00598	0.0851
				1222.6	0.00609	0.08532
				1223.6	0.00622	0.08555
				1224.5	0.00628	0.08581
				1225.5	0.00635	0.08608
				1226.5	0.00665	0.08647
				1227.4	0.00692	0.08694
				1228.4	0.00683	0.0874
				1229.4	0.00691	0.08797
				1230.3	0.00729	0.08872
				1231.3	0.00767	0.08945
				1232.3	0.00798	0.08988
				1233.2	0.00827	0.09013
				1234.2	0.00855	0.09022
				1235.2	0.00884	0.09001
				1236.1	0.00924	0.08972
				1237.1	0.00963	0.08955
				1238	0.01012	0.08963
				1239	0.01069	0.08989
				1240	0.01127	0.09014
				1240.9	0.01182	0.09007
				1241.9	0.01236	0.08946
				1242.9	0.01304	0.08848
				1243.8	0.01383	0.08754
				1244.8	0.01488	0.08706
				1245.8	0.01605	0.08688
				1246.7	0.01738	0.08682
				1247.7	0.01893	0.08682
				1248.7	0.02065	0.0868
				1249.6	0.02251	0.08683
				1250.6	0.0249	0.08693
				1251.5	0.02742	0.08706
				1252.5	0.02985	0.08714
				1253.5	0.03248	0.08725
				1254.4	0.03527	0.0874
				1255.4	0.03801	0.08756
				1256.4	0.04056	0.08771
				1257.3	0.04282	0.0878
				1258.3	0.04464	0.08782
				1259.3	0.04574	0.08784
				1260.2	0.04582	0.08786
				1261.2	0.04475	0.08774
				1262.2	0.04241	0.08761
				1263.1	0.03859	0.08755
				1264.1	0.03358	0.08754
				1265	0.02806	0.08765
				1266	0.02264	0.08783
				1267	0.0177	0.08814
				1267.9	0.0136	0.08856
				1268.9	0.01051	0.08909
				1269.9	0.00843	0.08983
				1270.8	0.00699	0.0907
				1271.8	0.00607	0.09172
				1272.8	0.00552	0.09288
				1273.7	0.00534	0.09417
				1274.7	0.00521	0.09544
				1275.7	0.00515	0.09664
				1276.6	0.00514	0.09774
				1277.6	0.00515	0.09861
				1278.5	0.00511	0.09901
				1279.5	0.00514	0.0987
				1280.5	0.0053	0.0977
				1281.4	0.00549	0.09623
				1282.4	0.00567	0.09459
				1283.4	0.00585	0.09302
				1284.3	0.0061	0.0916
				1285.3	0.00643	0.09033
				1286.3	0.00659	0.08918
				1287.2	0.00678	0.08815
				1288.2	0.00706	0.08729
				1289.2	0.00732	0.08656
				1290.1	0.00759	0.08607
				1291.1	0.00778	0.0858
				1292	0.00791	0.08567
				1293	0.00819	0.08566
				1294	0.0084	0.08564
				1294.9	0.00855	0.0856
				1295.9	0.00877	0.08558
				1296.9	0.00901	0.08558
				1297.8	0.00914	0.08566
				1298.8	0.00916	0.08573
				1299.8	0.00933	0.08577
				1300.7	0.00954	0.08579
				1301.7	0.00962	0.08582
				1302.7	0.00971	0.0859
				1303.6	0.00966	0.08591
				1304.6	0.00941	0.08593
				1305.5	0.0093	0.08598
				1306.5	0.00933	0.086
				1307.5	0.0094	0.08599
				1308.4	0.00929	0.08599
				1309.4	0.00919	0.08602
				1310.4	0.00921	0.08609
				1311.3	0.00925	0.08614
				1312.3	0.00916	0.08619
				1313.3	0.00918	0.08629
				1314.2	0.00921	0.0864
				1315.2	0.00917	0.08651
				1316.2	0.00917	0.08664
				1317.1	0.00927	0.08677
				1318.1	0.00932	0.08694
				1319	0.00945	0.08717
				1320	0.0097	0.08737
				1321	0.0099	0.08757
				1321.9	0.01012	0.08772
				1322.9	0.01026	0.08783
				1323.9	0.01046	0.08802
				1324.8	0.01077	0.08819
				1325.8	0.01095	0.08836
				1326.8	0.01124	0.08854
				1327.7	0.01172	0.08876
				1328.7	0.01221	0.08898
				1329.7	0.01256	0.08917
				1330.6	0.01281	0.08937
				1331.6	0.01312	0.08964
				1332.5	0.01346	0.08995
				1333.5	0.01388	0.09031
				1334.5	0.01429	0.09077
				1335.4	0.01463	0.09138
				1336.4	0.01485	0.09209
				1337.4	0.01511	0.0931
				1338.3	0.01544	0.09456
				1339.3	0.01579	0.09658
				1340.3	0.0162	0.09898
				1341.2	0.01671	0.10077
				1342.2	0.01708	0.09995
				1343.2	0.01736	0.09584
				1344.1	0.0177	0.09111
				1345.1	0.01805	0.0884
				1346	0.0184	0.08767
				1347	0.01887	0.08777
				1348	0.01921	0.08797
				1348.9	0.01936	0.08812
				1349.9	0.01957	0.08819
				1350.9	0.01994	0.08819
				1351.8	0.02025	0.0883
				1352.8	0.02047	0.08847
				1353.8	0.02071	0.08881
				1354.7	0.02089	0.08942
				1355.7	0.02115	0.09035
				1356.7	0.0214	0.09169
				1357.6	0.02168	0.09342
				1358.6	0.02185	0.0947
				1359.5	0.02199	0.0943
				1360.5	0.02213	0.09216
				1361.5	0.02232	0.08969
				1362.4	0.02234	0.08787
				1363.4	0.02247	0.08674
				1364.4	0.02288	0.08622
				1365.3	0.02312	0.086
				1366.3	0.02331	0.08599
				1367.3	0.02338	0.086
				1368.2	0.02343	0.086
				1369.2	0.02369	0.0861
				1370.1	0.02384	0.08623
				1371.1	0.02377	0.08627
				1372.1	0.02381	0.08629
				1373	0.02371	0.08625
				1374	0.02366	0.08618
				1375	0.02382	0.08612
				1375.9	0.02404	0.08612
				1376.9	0.02413	0.08608
				1377.9	0.02413	0.08594
				1378.8	0.02416	0.0859
				1379.8	0.02424	0.08594
				1380.8	0.02428	0.08602
				1381.7	0.0243	0.08621
				1382.7	0.0242	0.08641
				1383.6	0.02411	0.08649
				1384.6	0.0241	0.0863
				1385.6	0.024	0.08602
				1386.5	0.02372	0.08577
				1387.5	0.02346	0.08545
				1388.5	0.02378	0.08537
				1389.4	0.02401	0.08543
				1390.4	0.0239	0.08534
				1391.4	0.02367	0.0853
				1392.3	0.02338	0.08536
				1393.3	0.02303	0.0854
				1394.3	0.02254	0.08522
				1395.2	0.0226	0.08524
				1396.2	0.02271	0.08531
				1397.1	0.02247	0.08531
				1398.1	0.02205	0.08531
				1399.1	0.02164	0.08519
				1400	0.02164	0.08515
				1401	0.02156	0.08517
				1402	0.02129	0.08516
				1402.9	0.02106	0.0852
				1403.9	0.02065	0.08516
				1404.9	0.02011	0.085
				1405.8	0.01991	0.08498
				1406.8	0.0198	0.08506
				1407.8	0.01952	0.08506
				1408.7	0.01908	0.08507
				1409.7	0.01875	0.08507
				1410.6	0.01872	0.08509
				1411.6	0.01857	0.085
				1412.6	0.01827	0.08489
				1413.5	0.01778	0.08472
				1414.5	0.0173	0.08456
				1415.5	0.0169	0.08441
				1416.4	0.0164	0.08422
				1417.4	0.01606	0.08405
				1418.4	0.01528	0.08401
				1419.3	0.01385	0.08344
				1420.3	0.01404	0.08332
				1421.3	0.01417	0.0835
				1422.2	0.01373	0.08354
				1423.2	0.01316	0.08347
				1424.1	0.01268	0.08332
				1425.1	0.01233	0.08332
				1426.1	0.0119	0.08333
				1427	0.01158	0.0833
				1428	0.0113	0.08331
				1429	0.01077	0.0833
				1429.9	0.01022	0.08321
				1430.9	0.01005	0.0833
				1431.9	0.00984	0.08347
				1432.8	0.0094	0.0835
				1433.8	0.00903	0.08354
				1434.8	0.00876	0.08379
				1435.7	0.00779	0.08395
				1436.7	0.00663	0.08354
				1437.6	0.00733	0.08373
				1438.6	0.00778	0.08412
				1439.6	0.00768	0.08425
				1440.5	0.00729	0.0843
				1441.5	0.00692	0.08439
				1442.5	0.00696	0.0846
				1443.4	0.00699	0.08474
				1444.4	0.0069	0.08485
				1445.4	0.0068	0.08499
				1446.3	0.00654	0.0852
				1447.3	0.00598	0.08523
				1448.3	0.00574	0.08518
				1449.2	0.00603	0.08536
				1450.2	0.0061	0.08551
				1451.1	0.00617	0.08558
				1452.1	0.0061	0.08557
				1453.1	0.00608	0.08559
				1454	0.00608	0.0856
				1455	0.006	0.08558
				1456	0.00473	0.08528
				1456.9	0.00374	0.08444
				1457.9	0.00483	0.08462
				1458.9	0.00557	0.08505
				1459.8	0.00613	0.08548
				1460.8	0.0065	0.08601
				1461.8	0.00667	0.08663
				1462.7	0.00672	0.08744
				1463.7	0.00647	0.08854
				1464.6	0.00598	0.0897
				1465.6	0.00652	0.09076
				1466.6	0.00706	0.09092
				1467.5	0.00707	0.08956
				1468.5	0.00711	0.08751
				1469.5	0.00718	0.08574
				1470.4	0.00715	0.08482
				1471.4	0.00644	0.08408
				1472.4	0.00597	0.08342
				1473.3	0.00589	0.08284
				1474.3	0.00668	0.08227
				1475.3	0.00722	0.08153
				1476.2	0.00695	0.08029
				1477.2	0.00734	0.07953
				1478.1	0.00776	0.07916
				1479.1	0.00807	0.07893
				1480.1	0.00824	0.0788
				1481	0.00842	0.07867
				1482	0.00852	0.07859
				1483	0.00874	0.07858
				1483.9	0.00897	0.07863
				1484.9	0.00926	0.0787
				1485.9	0.00949	0.07876
				1486.8	0.00938	0.0787
				1487.8	0.00959	0.07863
				1488.8	0.00984	0.07874
				1489.7	0.00965	0.07862
				1490.7	0.00987	0.0785
				1491.6	0.01048	0.07865
				1492.6	0.01097	0.07884
				1493.6	0.01133	0.07888
				1494.5	0.01164	0.07911
				1495.5	0.01096	0.07899
				1496.5	0.01082	0.07853
				1497.4	0.01195	0.07886
				1498.4	0.01199	0.07892
				1499.4	0.01232	0.07884
				1500.3	0.01304	0.07902
				1501.3	0.01344	0.0791
				1502.3	0.0138	0.07917
				1503.2	0.0142	0.07928
				1504.2	0.01435	0.07957
				1505.1	0.01333	0.0794
				1506.1	0.01267	0.07899
				1507.1	0.01304	0.07873
				1508	0.01456	0.07902
				1509	0.01573	0.07934
				1510	0.01635	0.07937
				1510.9	0.0169	0.07954
				1511.9	0.01697	0.07946
				1512.9	0.01736	0.07939
				1513.8	0.01795	0.07953
				1514.8	0.01826	0.07957
				1515.8	0.01852	0.07969
				1516.7	0.01832	0.07954
				1517.7	0.01873	0.07938
				1518.6	0.01965	0.07968
				1519.6	0.01981	0.07992
				1520.6	0.01897	0.07959
				1521.5	0.01907	0.07916
				1522.5	0.02038	0.07937
				1523.5	0.0215	0.07965
				1524.4	0.0218	0.07984
				1525.4	0.02166	0.07961
				1526.4	0.02261	0.07974
				1527.3	0.02309	0.07982
				1528.3	0.02332	0.07979
				1529.3	0.02384	0.07981
				1530.2	0.02445	0.07993
				1531.2	0.0246	0.07993
				1532.1	0.02475	0.08005
				1533.1	0.02463	0.07993
				1534.1	0.02501	0.07969
				1535	0.02593	0.07988
				1536	0.02638	0.08
				1537	0.02672	0.0802
				1537.9	0.02627	0.08041
				1538.9	0.02488	0.07989
				1539.9	0.02504	0.07958
				1540.8	0.02614	0.0799
				1541.8	0.02622	0.07987
				1542.8	0.02677	0.07981
				1543.7	0.02768	0.08025
				1544.7	0.02735	0.08013
				1545.6	0.02762	0.08004
				1546.6	0.02823	0.08018
				1547.6	0.02833	0.0803
				1548.5	0.02824	0.08039
				1549.5	0.02803	0.08036
				1550.5	0.02816	0.08027
				1551.4	0.02851	0.0804
				1552.4	0.02868	0.08054
				1553.4	0.02816	0.08065
				1554.3	0.02741	0.08023
				1555.3	0.02827	0.08045
				1556.2	0.02851	0.0809
				1557.2	0.02734	0.08093
				1558.2	0.02584	0.08036
				1559.1	0.02582	0.0803
				1560.1	0.02581	0.07996
				1561.1	0.02739	0.08021
				1562	0.02838	0.08071
				1563	0.02843	0.0808
				1564	0.02815	0.08083
				1564.9	0.02793	0.08071
				1565.9	0.02813	0.08075
				1566.9	0.02821	0.08084
				1567.8	0.02811	0.08098
				1568.8	0.02749	0.08093
				1569.7	0.02676	0.08054
				1570.7	0.02741	0.08067
				1571.7	0.02781	0.08092
				1572.6	0.02787	0.08096
				1573.6	0.02774	0.08099
				1574.6	0.02745	0.08133
				1575.5	0.02555	0.08098
				1576.5	0.02483	0.08019
				1577.5	0.02636	0.08067
				1578.4	0.02668	0.08088
				1579.4	0.02646	0.08085
				1580.4	0.02618	0.08081
				1581.3	0.02604	0.08086
				1582.3	0.02573	0.08084
				1583.2	0.02535	0.08083
				1584.2	0.02509	0.08082
				1585.2	0.025	0.0808
				1586.1	0.02468	0.08078
				1587.1	0.02437	0.08078
				1588.1	0.02412	0.08071
				1589	0.02396	0.08072
				1590	0.02366	0.08071
				1591	0.02331	0.08068
				1591.9	0.02302	0.08065
				1592.9	0.02273	0.08062
				1593.9	0.02237	0.08059
				1594.8	0.0221	0.08056
				1595.8	0.02196	0.08054
				1596.7	0.02178	0.08056
				1597.7	0.02152	0.08058
				1598.7	0.02115	0.08052
				1599.6	0.02088	0.08052
				1600.6	0.02061	0.08054
				1601.6	0.02036	0.08052
				1602.5	0.02008	0.08048
				1603.5	0.0197	0.0804
				1604.5	0.01934	0.08037
				1605.4	0.01901	0.08036
				1606.4	0.01863	0.08032
				1607.4	0.01834	0.08031
				1608.3	0.01801	0.08032
				1609.3	0.01755	0.08026
				1610.2	0.01739	0.08026
				1611.2	0.01724	0.0803
				1612.2	0.01684	0.08028
				1613.1	0.01655	0.08029
				1614.1	0.01626	0.0803
				1615.1	0.0159	0.08065
				1616	0.01405	0.08038
				1617	0.01335	0.07966
				1618	0.01474	0.0801
				1618.9	0.0148	0.08039
				1619.9	0.01447	0.0804
				1620.9	0.01396	0.08032
				1621.8	0.01356	0.08039
				1622.8	0.01271	0.08022
				1623.7	0.01207	0.07989
				1624.7	0.01228	0.07998
				1625.7	0.0123	0.08011
				1626.6	0.01174	0.08009
				1627.6	0.01108	0.07992
				1628.6	0.01083	0.07987
				1629.5	0.01076	0.07994
				1630.5	0.01052	0.07993
				1631.5	0.01002	0.07992
				1632.4	0.00964	0.07987
				1633.4	0.00945	0.08003
				1634.4	0.00832	0.08015
				1635.3	0.00652	0.0794
				1636.3	0.007	0.07927
				1637.2	0.00754	0.07962
				1638.2	0.00743	0.07964
				1639.2	0.00735	0.07974
				1640.1	0.00713	0.07971
				1641.1	0.00679	0.07973
				1642.1	0.00645	0.07966
				1643	0.00614	0.07968
				1644	0.00581	0.07978
				1645	0.00499	0.07983
				1645.9	0.00385	0.07934
				1646.9	0.00407	0.0794
				1647.9	0.00407	0.07942
				1648.8	0.00425	0.07945
				1649.8	0.00452	0.0796
				1650.7	0.00464	0.08005
				1651.7	0.00272	0.08008
				1652.7	-0.000109192	0.07879
				1653.6	0.000627784	0.07841
				1654.6	0.00238	0.07897
				1655.6	0.00327	0.07938
				1656.5	0.00342	0.07956
				1657.5	0.00328	0.07953
				1658.5	0.00327	0.07952
				1659.4	0.00315	0.07949
				1660.4	0.00303	0.07949
				1661.4	0.00289	0.07947
				1662.3	0.00232	0.07927
				1663.3	0.00227	0.07901
				1664.2	0.00282	0.07922
				1665.2	0.00295	0.07925
				1666.2	0.00301	0.07925
				1667.1	0.00297	0.07921
				1668.1	0.00256	0.07927
				1669.1	0.00161	0.07882
				1670	0.00208	0.07879
				1671	0.00247	0.07885
				1672	0.00257	0.07871
				1672.9	0.00283	0.07879
				1673.9	0.0027	0.07892
				1674.9	0.00162	0.07838
				1675.8	0.00176	0.07806
				1676.8	0.00268	0.07827
				1677.7	0.00286	0.07828
				1678.7	0.00276	0.07819
				1679.7	0.00255	0.07804
				1680.6	0.0026	0.07791
				1681.6	0.00265	0.078
				1682.6	0.00217	0.07808
				1683.5	0.0012	0.07803
				1684.5	-0.000340357	0.07706
				1685.5	0.000953987	0.07682
				1686.4	0.00278	0.0775
				1687.4	0.0029	0.07754
				1688.4	0.00305	0.07754
				1689.3	0.00303	0.07747
				1690.3	0.00308	0.07738
				1691.2	0.00336	0.07744
				1692.2	0.0037	0.07753
				1693.2	0.00374	0.07756
				1694.1	0.00378	0.07794
				1695.1	0.00217	0.07763
				1696.1	0.00144	0.07658
				1697	0.00328	0.07703
				1698	0.00403	0.07762
				1699	0.0034	0.07788
				1699.9	0.00126	0.0769
				1700.9	0.0018	0.07643
				1701.9	0.00359	0.07702
				1702.8	0.0041	0.07733
				1703.8	0.00377	0.07726
				1704.7	0.00358	0.07715
				1705.7	0.0035	0.07717
				1706.7	0.00348	0.07707
				1707.6	0.00393	0.07721
				1708.6	0.00409	0.07733
				1709.6	0.00408	0.07731
				1710.5	0.00401	0.07728
				1711.5	0.00418	0.07741
				1712.5	0.00425	0.07754
				1713.4	0.0041	0.07763
				1714.4	0.00365	0.07752
				1715.4	0.00367	0.07756
				1716.3	0.00338	0.07791
				1717.3	0.002	0.07732
				1718.2	0.00248	0.07712
				1719.2	0.00358	0.07746
				1720.2	0.00411	0.07771
				1721.1	0.00416	0.07782
				1722.1	0.0041	0.0779
				1723.1	0.00402	0.07793
				1724	0.00402	0.07795
				1725	0.00403	0.07801
				1726	0.00398	0.07807
				1726.9	0.004	0.07813
				1727.9	0.00396	0.07818
				1728.9	0.0038	0.07824
				1729.8	0.00362	0.07814
				1730.8	0.00378	0.07815
				1731.7	0.00394	0.07843
				1732.7	0.00306	0.07847
				1733.7	0.00155	0.07784
				1734.6	0.00151	0.07738
				1735.6	0.00298	0.07771
				1736.6	0.00366	0.07792
				1737.5	0.00371	0.0778
				1738.5	0.00349	0.07785
				1739.5	0.00268	0.07742
				1740.4	0.00287	0.07713
				1741.4	0.00346	0.07723
				1742.4	0.00348	0.07715
				1743.3	0.00338	0.0769
				1744.3	0.00335	0.07675
				1745.2	0.00336	0.07669
				1746.2	0.00337	0.07659
				1747.2	0.00322	0.07641
				1748.1	0.00303	0.07621
				1749.1	0.00314	0.0761
				1750.1	0.00306	0.07623
				1751	0.00223	0.07576
				1752	0.0028	0.07561
				1753	0.0035	0.0758
				1753.9	0.00358	0.07579
				1754.9	0.00364	0.07586
				1755.8	0.00342	0.07584
				1756.8	0.00318	0.07564
				1757.8	0.00355	0.07565
				1758.7	0.00368	0.07573
				1759.7	0.00377	0.07581
				1760.7	0.00358	0.0759
				1761.6	0.00303	0.07565
				1762.6	0.00348	0.07564
				1763.6	0.00398	0.0758
				1764.5	0.00411	0.07587
				1765.5	0.00421	0.07594
				1766.5	0.00418	0.07605
				1767.4	0.00364	0.07597
				1768.4	0.00335	0.07569
				1769.3	0.00395	0.07589
				1770.3	0.00392	0.07602
				1771.3	0.00354	0.07604
				1772.2	0.0028	0.07568
				1773.2	0.00314	0.07548
				1774.2	0.00418	0.07589
				1775.1	0.00425	0.07594
				1776.1	0.00424	0.07587
				1777.1	0.00427	0.07585
				1778	0.00432	0.07586
				1779	0.00442	0.07586
				1780	0.00428	0.07584
				1780.9	0.00429	0.07575
				1781.9	0.00458	0.07577
				1782.8	0.00469	0.07581
				1783.8	0.00457	0.07585
				1784.8	0.00423	0.0757
				1785.7	0.00442	0.07567
				1786.7	0.00472	0.07576
				1787.7	0.0047	0.07573
				1788.6	0.00463	0.07567
				1789.6	0.00453	0.0757
				1790.6	0.00453	0.07573
				1791.5	0.00431	0.07571
				1792.5	0.00386	0.07535
				1793.5	0.00441	0.07538
				1794.4	0.00484	0.07568
				1795.4	0.00478	0.07569
				1796.3	0.00488	0.07561
				1797.3	0.00491	0.07563
				1798.3	0.00489	0.07572
				1799.2	0.00473	0.07558
				1800.2	0.00491	0.07553
				1801.2	0.00502	0.07553
				1802.1	0.00498	0.07548
				1803.1	0.0051	0.07549
				1804.1	0.00514	0.0755
				1805	0.00507	0.0755
				1806	0.00515	0.07551
				1807	0.00517	0.07548
				1807.9	0.00529	0.07547
				1808.9	0.00537	0.07553
				1809.8	0.00515	0.07549
				1810.8	0.005	0.07539
				1811.8	0.00521	0.07543
				1812.7	0.00544	0.07547
				1813.7	0.00556	0.07546
				1814.7	0.00555	0.0754
				1815.6	0.00549	0.07539
				1816.6	0.0053	0.0754
				1817.6	0.00534	0.0754
				1818.5	0.00552	0.07539
				1819.5	0.00567	0.07537
				1820.5	0.00576	0.07536
				1821.4	0.00568	0.07534
				1822.4	0.00556	0.07527
				1823.3	0.00569	0.07537
				1824.3	0.00543	0.07536
				1825.3	0.00517	0.07519
				1826.2	0.00544	0.07524
				1827.2	0.0057	0.07535
				1828.2	0.00572	0.07537
				1829.1	0.00541	0.07528
				1830.1	0.00507	0.07503
				1831.1	0.00546	0.07509
				1832	0.00578	0.07519
				1833	0.00583	0.07518
				1834	0.0057	0.07517
				1834.9	0.00586	0.0752
				1835.9	0.00596	0.07521
				1836.8	0.00591	0.07519
				1837.8	0.00585	0.07518
				1838.8	0.0059	0.07519
				1839.7	0.00591	0.07516
				1840.7	0.00594	0.07515
				1841.7	0.0058	0.07514
				1842.6	0.00583	0.07527
				1843.6	0.00507	0.07501
				1844.6	0.00494	0.07469
				1845.5	0.00573	0.07497
				1846.5	0.00592	0.07508
				1847.5	0.00579	0.075
				1848.4	0.00577	0.07496
				1849.4	0.00582	0.07501
				1850.3	0.00597	0.07506
				1851.3	0.00607	0.07507
				1852.3	0.00608	0.07509
				1853.2	0.006	0.07513
				1854.2	0.00599	0.07514
				1855.2	0.00608	0.07516
				1856.1	0.00607	0.07513
				1857.1	0.00609	0.07515
				1858.1	0.00608	0.07518
				1859	0.00594	0.07514
				1860	0.00602	0.07515
				1861	0.00607	0.0752
				1861.9	0.0061	0.07521
				1862.9	0.00616	0.07517
				1863.8	0.00617	0.07519
				1864.8	0.00613	0.07524
				1865.8	0.00596	0.07527
				1866.7	0.00598	0.07528
				1867.7	0.00598	0.07534
				1868.7	0.00572	0.07524
				1869.6	0.00573	0.07508
				1870.6	0.00602	0.07518
				1871.6	0.00605	0.07523
				1872.5	0.00603	0.07528
				1873.5	0.00608	0.07531
				1874.5	0.0061	0.07528
				1875.4	0.00618	0.07527
				1876.4	0.00622	0.0753
				1877.3	0.00625	0.0753
				1878.3	0.00628	0.07537
				1879.3	0.00632	0.07544
				1880.2	0.00637	0.07543
				1881.2	0.00625	0.07537
				1882.2	0.00613	0.07537
				1883.1	0.00619	0.07543
				1884.1	0.00612	0.07543
				1885.1	0.00607	0.07539
				1886	0.00627	0.07545
				1887	0.00639	0.07549
				1888	0.0063	0.07552
				1888.9	0.00599	0.07544
				1889.9	0.00597	0.0754
				1890.8	0.00624	0.07546
				1891.8	0.00621	0.07546
				1892.8	0.00615	0.07545
				1893.7	0.00632	0.07551
				1894.7	0.00628	0.07551
				1895.7	0.00617	0.07551
				1896.6	0.00616	0.0755
				1897.6	0.0062	0.07544
				1898.6	0.00637	0.07546
				1899.5	0.00641	0.07553
				1900.5	0.00644	0.07555
				1901.5	0.0064	0.07557
				1902.4	0.00631	0.07557
				1903.4	0.00619	0.07553
				1904.3	0.00619	0.07557
				1905.3	0.00619	0.0756
				1906.3	0.00627	0.07559
				1907.2	0.00622	0.07558
				1908.2	0.00615	0.07556
				1909.2	0.00622	0.0756
				1910.1	0.00623	0.07562
				1911.1	0.00621	0.07557
				1912.1	0.00629	0.07553
				1913	0.00639	0.07556
				1914	0.00635	0.07556
				1915	0.00632	0.07555
				1915.9	0.00635	0.07561
				1916.9	0.00607	0.07565
				1917.8	0.0057	0.07549
				1918.8	0.00592	0.0755
				1919.8	0.00608	0.07559
				1920.7	0.00613	0.07563
				1921.7	0.00611	0.07566
				1922.7	0.00614	0.07563
				1923.6	0.00625	0.07562
				1924.6	0.00622	0.07562
				1925.6	0.0063	0.07562
				1926.5	0.00631	0.07563
				1927.5	0.00625	0.07567
				1928.5	0.00633	0.07572
				1929.4	0.00638	0.07573
				1930.4	0.00635	0.07569
				1931.3	0.00632	0.07573
				1932.3	0.00632	0.07577
				1933.3	0.00644	0.07579
				1934.2	0.00644	0.07582
				1935.2	0.00626	0.0758
				1936.2	0.00629	0.07579
				1937.1	0.00633	0.07583
				1938.1	0.00628	0.07585
				1939.1	0.00629	0.07585
				1940	0.00627	0.07583
				1941	0.00619	0.07586
				1941.9	0.00605	0.07581
				1942.9	0.00598	0.07573
				1943.9	0.00614	0.0758
				1944.8	0.00619	0.07582
				1945.8	0.00619	0.07578
				1946.8	0.00615	0.07573
				1947.7	0.00606	0.07576
				1948.7	0.00606	0.07578
				1949.7	0.00606	0.07576
				1950.6	0.00605	0.0758
				1951.6	0.00612	0.07581
				1952.6	0.00612	0.07579
				1953.5	0.00595	0.07577
				1954.5	0.00589	0.07574
				1955.4	0.00593	0.07577
				1956.4	0.00605	0.07582
				1957.4	0.00614	0.0758
				1958.3	0.00598	0.07572
				1959.3	0.00573	0.07566
				1960.3	0.00574	0.0757
				1961.2	0.00587	0.07572
				1962.2	0.00599	0.07577
				1963.2	0.00598	0.07576
				1964.1	0.00581	0.07571
				1965.1	0.00571	0.07569
				1966.1	0.00576	0.0757
				1967	0.0058	0.0757
				1968	0.00581	0.07571
				1968.9	0.00579	0.07571
				1969.9	0.00574	0.07568
				1970.9	0.00564	0.07562
				1971.8	0.00566	0.07562
				1972.8	0.00567	0.07562
				1973.8	0.00575	0.07566
				1974.7	0.00574	0.07566
				1975.7	0.00562	0.07563
				1976.7	0.00564	0.07562
				1977.6	0.00558	0.0756
				1978.6	0.00553	0.0756
				1979.6	0.00551	0.07562
				1980.5	0.00547	0.07558
				1981.5	0.00552	0.07553
				1982.4	0.00547	0.0755
				1983.4	0.00546	0.07552
				1984.4	0.00544	0.07555
				1985.3	0.00547	0.07557
				1986.3	0.00548	0.07557
				1987.3	0.00552	0.07555
				1988.2	0.00543	0.0755
				1989.2	0.00545	0.07551
				1990.2	0.0054	0.07552
				1991.1	0.00521	0.07547
				1992.1	0.00502	0.07541
				1993.1	0.00501	0.07542
				1994	0.00527	0.07546
				1995	0.0055	0.0755
				1995.9	0.00538	0.07553
				1996.9	0.00524	0.07552
				1997.9	0.00525	0.07547
				1998.8	0.0052	0.07543
				1999.8	0.0051	0.07544
				2000.8	0.00505	0.0754

## Sheet: Figure 1C
			Energy	Counts
			KeV	a.u.
			0.0075	9324
			0.0275	10433
			0.0475	10366
			0.0675	9506
			0.0875	7765
			0.1075	6154
			0.1275	4628
			0.1475	3634
			0.1675	3403
			0.1875	4004
			0.2075	5012
			0.2275	6469
			0.2475	8103
			0.2675	9061
			0.2875	9517
			0.3075	8899
			0.3275	7687
			0.3475	6000
			0.3675	4536
			0.3875	3116
			0.4075	2221
			0.4275	1631
			0.4475	1313
			0.4675	1146
			0.4875	1063
			0.5075	1148
			0.5275	1121
			0.5475	1141
			0.5675	1085
			0.5875	971
			0.6075	911
			0.6275	877
			0.6475	863
			0.6675	784
			0.6875	867
			0.7075	914
			0.7275	976
			0.7475	1042
			0.7675	1168
			0.7875	1269
			0.8075	1488
			0.8275	1761
			0.8475	2172
			0.8675	2463
			0.8875	2841
			0.9075	3189
			0.9275	3347
			0.9475	3336
			0.9675	3193
			0.9875	2809
			1.0075	2475
			1.0275	1968
			1.0475	1706
			1.0675	1528
			1.0875	1368
			1.1075	1224
			1.1275	1215
			1.1475	1228
			1.1675	1113
			1.1875	1121
			1.2075	1060
			1.2275	1031
			1.2475	998
			1.2675	1017
			1.2875	964
			1.3075	1012
			1.3275	1051
			1.3475	1010
			1.3675	952
			1.3875	1004
			1.4075	1020
			1.4275	1034
			1.4475	975
			1.4675	936
			1.4875	973
			1.5075	994
			1.5275	907
			1.5475	948
			1.5675	917
			1.5875	859
			1.6075	942
			1.6275	956
			1.6475	963
			1.6675	952
			1.6875	985
			1.7075	1024
			1.7275	1019
			1.7475	1046
			1.7675	1055
			1.7875	1067
			1.8075	965
			1.8275	965
			1.8475	933
			1.8675	953
			1.8875	880
			1.9075	840
			1.9275	873
			1.9475	910
			1.9675	884
			1.9875	873
			2.0075	877
			2.0275	869
			2.0475	878
			2.0675	901
			2.0875	880
			2.1075	895
			2.1275	929
			2.1475	958
			2.1675	982
			2.1875	1019
			2.2075	1071
			2.2275	1154
			2.2475	1306
			2.2675	1438
			2.2875	1640
			2.3075	1915
			2.3275	2094
			2.3475	2383
			2.3675	2658
			2.3875	2708
			2.4075	2893
			2.4275	3013
			2.4475	3027
			2.4675	3097
			2.4875	3365
			2.5075	3725
			2.5275	4492
			2.5475	5652
			2.5675	7561
			2.5875	10252
			2.6075	14261
			2.6275	18643
			2.6475	23605
			2.6675	27513
			2.6875	30630
			2.7075	31903
			2.7275	31374
			2.7475	29783
			2.7675	26701
			2.7875	24373
			2.8075	21873
			2.8275	19704
			2.8475	17888
			2.8675	15970
			2.8875	14136
			2.9075	12365
			2.9275	10426
			2.9475	8636
			2.9675	7241
			2.9875	6017
			3.0075	5168
			3.0275	4451
			3.0475	3813
			3.0675	3374
			3.0875	2948
			3.1075	2574
			3.1275	2254
			3.1475	2043
			3.1675	1784
			3.1875	1558
			3.2075	1385
			3.2275	1192
			3.2475	1113
			3.2675	968
			3.2875	911
			3.3075	905
			3.3275	866
			3.3475	933
			3.3675	890
			3.3875	882
			3.4075	801
			3.4275	792
			3.4475	744
			3.4675	673
			3.4875	623
			3.5075	579
			3.5275	563
			3.5475	527
			3.5675	518
			3.5875	445
			3.6075	490
			3.6275	502
			3.6475	502
			3.6675	467
			3.6875	459
			3.7075	448
			3.7275	437
			3.7475	471
			3.7675	446
			3.7875	465
			3.8075	436
			3.8275	435
			3.8475	409
			3.8675	432
			3.8875	361
			3.9075	410
			3.9275	435
			3.9475	468
			3.9675	436
			3.9875	395
			4.0075	415
			4.0275	392
			4.0475	366
			4.0675	380
			4.0875	387
			4.1075	424
			4.1275	419
			4.1475	392
			4.1675	392
			4.1875	411
			4.2075	404
			4.2275	377
			4.2475	369
			4.2675	432
			4.2875	372
			4.3075	376
			4.3275	354
			4.3475	381
			4.3675	350
			4.3875	361
			4.4075	370
			4.4275	370
			4.4475	334
			4.4675	327
			4.4875	378
			4.5075	368
			4.5275	365
			4.5475	385
			4.5675	352
			4.5875	366
			4.6075	360
			4.6275	345
			4.6475	349
			4.6675	325
			4.6875	351
			4.7075	344
			4.7275	373
			4.7475	327
			4.7675	386
			4.7875	380
			4.8075	352
			4.8275	356
			4.8475	386
			4.8675	342
			4.8875	346
			4.9075	375
			4.9275	379
			4.9475	369
			4.9675	354
			4.9875	359
			5.0075	387
			5.0275	335
			5.0475	355
			5.0675	369
			5.0875	349
			5.1075	362
			5.1275	368
			5.1475	347
			5.1675	387
			5.1875	420
			5.2075	414
			5.2275	401
			5.2475	384
			5.2675	443
			5.2875	432
			5.3075	446
			5.3275	447
			5.3475	467
			5.3675	497
			5.3875	489
			5.4075	507
			5.4275	490
			5.4475	509
			5.4675	475
			5.4875	501
			5.5075	467
			5.5275	433
			5.5475	417
			5.5675	485
			5.5875	452
			5.6075	414
			5.6275	433
			5.6475	416
			5.6675	414
			5.6875	417
			5.7075	378
			5.7275	367
			5.7475	371
			5.7675	377
			5.7875	338
			5.8075	373
			5.8275	317
			5.8475	343
			5.8675	339
			5.8875	343
			5.9075	337
			5.9275	316
			5.9475	317
			5.9675	339
			5.9875	356
			6.0075	319
			6.0275	330
			6.0475	311
			6.0675	286
			6.0875	334
			6.1075	316
			6.1275	289
			6.1475	303
			6.1675	294
			6.1875	339
			6.2075	367
			6.2275	306
			6.2475	314
			6.2675	347
			6.2875	386
			6.3075	351
			6.3275	410
			6.3475	427
			6.3675	462
			6.3875	464
			6.4075	415
			6.4275	432
			6.4475	411
			6.4675	404
			6.4875	372
			6.5075	341
			6.5275	318
			6.5475	312
			6.5675	314
			6.5875	308
			6.6075	302
			6.6275	248
			6.6475	300
			6.6675	317
			6.6875	306
			6.7075	304
			6.7275	277
			6.7475	334
			6.7675	331
			6.7875	298
			6.8075	308
			6.8275	350
			6.8475	390
			6.8675	410
			6.8875	392
			6.9075	445
			6.9275	461
			6.9475	377
			6.9675	392
			6.9875	410

## Sheet: Figure 1E
			Sample 1			Sample 2			Sample 3			Sample 4			Sample 5			Sample 6
			45 ± 15			37± 13			32 ± 12			29± 10			22 ± 8			19 ± 8
			Rh NPs Size	Frequency		Rh NPs Size	Frequency		Rh NPs Size	Frequency		Rh NPs Size	Frequency		Rh NPs Size	Frequency		Rh NPs Size	Frequency
			nm	%		nm	%		nm	%		nm	%		nm	%		nm	%
			5	0.64205		5	2.9052		5	6.347		5	5.38033		5	11.9584		5	21.6828
			15	7.0626		15	12.3853		15	14.731		15	14.8423		15	21.3172		15	27.5081
			25	10.9149		25	11.0092		25	13.054		25	27.2727		25	50.7799		25	46.1165
			35	10.9149		35	20.948		35	38.084		35	44.898		35	15.4246		35	4.69256
			45	29.8555		45	38.5321		45	25.868		45	7.23562		45	0.51993		45	0
			55	29.2135		55	13.1499		55	1.916		55	0.37106		55	0		55	0
			65	8.82825		65	0.91743		65	0		65	0		65	0		65	0
			75	1.76565		75	0.15291		75	0		75	0		75	0		75	0
			85	0.48154		85	0		85	0		85	0		85	0		85	0
			95	0.16051		95	0		95	0		95	0		95	0		95	0
			105	0.16051		105	0		105	0		105	0		105	0		105	0

## Sheet: Figure 1F
			Sample 1	Mie-Gans fit			Sample 2	Mie-Gans fit			Sample 3	Mie-Gans fit			Sample 4	Mie-Gans fit			Sample 5	Mie-Gans fit			Sample 6	Mie-Gans fit
		Wavelength	Absorbance	Absorbance		Wavelength	Absorbance	Absorbance		Wavelength	Absorbance	Absorbance		Wavelength	Absorbance	Absorbance		Wavelength	Absorbance	Absorbance		Wavelength	Absorbance	Absorbance
		nm	a.u.	a.u.		nm	a.u.	a.u.		nm	a.u.	a.u.		nm	a.u.	a.u.		nm	a.u.	a.u.		nm	a.u.	a.u.
		1000	0.03061	0.02746		1000	0.02339	0.02001		1000	0.01695	0.01437		1000	0.01545	0.02746		1000	0.0146	0.01133		1000	0.01835	0.01178
		995	0.03096	0.02775		995	0.02371	0.02021		995	0.01721	0.01451		995	0.01608	0.02775		995	0.01502	0.01144		995	0.0191	0.0119
		990	0.03135	0.02806		990	0.02397	0.02043		990	0.01745	0.01466		990	0.01621	0.02806		990	0.01522	0.01156		990	0.01932	0.01203
		985	0.03157	0.0284		985	0.02409	0.02067		985	0.01764	0.01483		985	0.01628	0.0284		985	0.01544	0.01169		985	0.01892	0.01217
		980	0.03202	0.02874		980	0.02441	0.02091		980	0.01777	0.015		980	0.01695	0.02874		980	0.01589	0.01182		980	0.01956	0.01231
		975	0.0325	0.0291		975	0.02477	0.02115		975	0.01809	0.01517		975	0.01728	0.0291		975	0.01627	0.01196		975	0.02042	0.01245
		970	0.03273	0.02945		970	0.02494	0.0214		970	0.0183	0.01534		970	0.01723	0.02945		970	0.01662	0.0121		970	0.01988	0.0126
		965	0.03327	0.02982		965	0.02533	0.02165		965	0.01844	0.01552		965	0.01789	0.02982		965	0.01689	0.01224		965	0.02075	0.01274
		960	0.03359	0.03019		960	0.02557	0.02191		960	0.01863	0.0157		960	0.01786	0.03019		960	0.01686	0.01238		960	0.02081	0.01289
		955	0.0338	0.03057		955	0.02581	0.02217		955	0.01875	0.01589		955	0.01779	0.03057		955	0.01681	0.01253		955	0.0205	0.01305
		950	0.03414	0.03096		950	0.02608	0.02244		950	0.01884	0.01608		950	0.01781	0.03096		950	0.01693	0.01268		950	0.02044	0.01321
		945	0.03448	0.03135		945	0.02643	0.02271		945	0.01903	0.01627		945	0.01806	0.03135		945	0.01694	0.01283		945	0.02063	0.01337
		940	0.03489	0.03176		940	0.02668	0.02299		940	0.0193	0.01646		940	0.01824	0.03176		940	0.01707	0.01298		940	0.02084	0.01353
		935	0.03521	0.03217		935	0.02701	0.02327		935	0.01945	0.01666		935	0.01837	0.03217		935	0.01716	0.01314		935	0.02111	0.01369
		930	0.0355	0.03259		930	0.02727	0.02356		930	0.01957	0.01687		930	0.01843	0.03259		930	0.01738	0.0133		930	0.02072	0.01386
		925	0.03589	0.03302		925	0.02762	0.02386		925	0.01982	0.01707		925	0.01844	0.03302		925	0.01721	0.01346		925	0.02072	0.01404
		920	0.03629	0.03346		920	0.02791	0.02416		920	0.02003	0.01728		920	0.01868	0.03346		920	0.01744	0.01363		920	0.02104	0.01421
		915	0.03676	0.03391		915	0.02826	0.02446		915	0.02027	0.0175		915	0.01883	0.03391		915	0.01764	0.0138		915	0.02123	0.01439
		910	0.03705	0.03436		910	0.02855	0.02477		910	0.02039	0.01771		910	0.0189	0.03436		910	0.0177	0.01397		910	0.02083	0.01457
		905	0.03762	0.03483		905	0.029	0.02509		905	0.02075	0.01794		905	0.01945	0.03483		905	0.01818	0.01415		905	0.02156	0.01476
		900	0.03795	0.03531		900	0.02919	0.02542		900	0.02083	0.01816		900	0.01935	0.03531		900	0.018	0.01432		900	0.02143	0.01495
		895	0.03828	0.03579		895	0.02952	0.02575		895	0.02101	0.01839		895	0.01953	0.03579		895	0.01811	0.01451		895	0.02108	0.01514
		890	0.03893	0.03629		890	0.03001	0.02608		890	0.02145	0.01863		890	0.02003	0.03629		890	0.01846	0.01469		890	0.02192	0.01533
		885	0.03936	0.0368		885	0.03031	0.02643		885	0.02168	0.01887		885	0.0203	0.0368		885	0.01871	0.01488		885	0.02211	0.01554
		880	0.0399	0.03736		880	0.0307	0.02682		880	0.02193	0.01914		880	0.02042	0.03736		880	0.01904	0.0151		880	0.02237	0.01576
		875	0.0404	0.03793		875	0.03112	0.02721		875	0.02221	0.01941		875	0.02082	0.03793		875	0.01923	0.01531		875	0.02253	0.01599
		870	0.04086	0.03852		870	0.03156	0.02761		870	0.02245	0.01969		870	0.02107	0.03852		870	0.01948	0.01554		870	0.02275	0.01623
		865	0.04138	0.03913		865	0.0319	0.02802		865	0.02276	0.01998		865	0.0213	0.03913		865	0.01964	0.01576		865	0.02295	0.01647
		860	0.04183	0.03974		860	0.03224	0.02844		860	0.02298	0.02028		860	0.02143	0.03974		860	0.01977	0.016		860	0.02303	0.01672
		855	0.04242	0.04037		855	0.03267	0.02887		855	0.02328	0.02058		855	0.0218	0.04037		855	0.02021	0.01624		855	0.02351	0.01697
		850	0.04296	0.04102		850	0.03308	0.02932		850	0.0236	0.02088		850	0.02197	0.04102		850	0.02033	0.01648		850	0.02367	0.01723
		845	0.0436	0.04169		845	0.03353	0.02977		845	0.02393	0.0212		845	0.0223	0.04169		845	0.02066	0.01673		845	0.02387	0.0175
		840	0.04409	0.04237		840	0.03394	0.03023		840	0.0242	0.02152		840	0.02256	0.04237		840	0.02076	0.01698		840	0.02392	0.01777
		835	0.04466	0.04306		835	0.03439	0.0307		835	0.02452	0.02185		835	0.02283	0.04306		835	0.02108	0.01725		835	0.02431	0.01805
		830	0.04525	0.04378		830	0.03486	0.03119		830	0.02486	0.02219		830	0.02313	0.04378		830	0.02129	0.01751		830	0.02471	0.01833
		825	0.04579	0.04452		825	0.0353	0.0317		825	0.02517	0.02254		825	0.02333	0.04452		825	0.02157	0.01779		825	0.02462	0.01863
		820	0.04642	0.04529		820	0.03579	0.03223		820	0.0255	0.02292		820	0.0236	0.04529		820	0.0217	0.01809		820	0.02505	0.01894
		815	0.047	0.04608		815	0.03622	0.03278		815	0.02584	0.0233		815	0.02376	0.04608		815	0.02201	0.01839		815	0.02517	0.01927
		810	0.04752	0.0469		810	0.03667	0.03335		810	0.02621	0.02369		810	0.02408	0.0469		810	0.0222	0.0187		810	0.02537	0.0196
		805	0.04811	0.04774		805	0.0372	0.03393		805	0.02658	0.0241		805	0.02444	0.04774		805	0.02249	0.01902		805	0.02587	0.01994
		800	0.0485	0.0486		800	0.03761	0.03453		800	0.02691	0.02451		800	0.02443	0.0486		800	0.02252	0.01935		800	0.02565	0.02029
		795	0.05076	0.04948		795	0.03933	0.03514		795	0.02758	0.02494		795	0.02595	0.04948		795	0.02381	0.01969		795	0.02598	0.02065
		790	0.0516	0.05038		790	0.03984	0.03577		790	0.02793	0.02538		790	0.0262	0.05038		790	0.02403	0.02004		790	0.02656	0.02102
		785	0.05233	0.05132		785	0.04047	0.03642		785	0.02833	0.02583		785	0.02669	0.05132		785	0.02433	0.0204		785	0.02716	0.0214
		780	0.05298	0.05227		780	0.04104	0.03708		780	0.02854	0.02629		780	0.02664	0.05227		780	0.02479	0.02076		780	0.02669	0.02179
		775	0.05388	0.05326		775	0.04178	0.03777		775	0.02926	0.02677		775	0.02745	0.05326		775	0.02521	0.02114		775	0.02796	0.02219
		770	0.05477	0.05428		770	0.04245	0.03848		770	0.02976	0.02726		770	0.02794	0.05428		770	0.02564	0.02153		770	0.02793	0.02261
		765	0.05555	0.05533		765	0.04308	0.03921		765	0.03007	0.02777		765	0.0283	0.05533		765	0.02615	0.02193		765	0.02817	0.02304
		760	0.05657	0.05642		760	0.04391	0.03996		760	0.03076	0.02829		760	0.02875	0.05642		760	0.02687	0.02234		760	0.02981	0.02348
		755	0.05737	0.05753		755	0.04448	0.04074		755	0.03127	0.02883		755	0.02928	0.05753		755	0.02687	0.02277		755	0.02924	0.02393
		750	0.0584	0.05868		750	0.0453	0.04154		750	0.0317	0.02938		750	0.02987	0.05868		750	0.02735	0.02321		750	0.03002	0.0244
		745	0.05934	0.05986		745	0.04594	0.04237		745	0.03224	0.02995		745	0.03	0.05986		745	0.02772	0.02366		745	0.03084	0.02488
		740	0.06044	0.06108		740	0.04682	0.04322		740	0.03288	0.03054		740	0.03088	0.06108		740	0.02853	0.02412		740	0.0315	0.02538
		735	0.06151	0.06234		735	0.04764	0.0441		735	0.03345	0.03115		735	0.03162	0.06234		735	0.02908	0.0246		735	0.03175	0.02589
		730	0.06257	0.06363		730	0.04848	0.04501		730	0.03398	0.03177		730	0.03205	0.06363		730	0.02922	0.02509		730	0.03215	0.02642
		725	0.06362	0.06499		725	0.04932	0.04599		725	0.03463	0.03246		725	0.03255	0.06499		725	0.02975	0.02564		725	0.0327	0.027
		720	0.06475	0.0664		720	0.05022	0.04702		720	0.03536	0.03318		720	0.03308	0.0664		720	0.03049	0.02621		720	0.03339	0.02761
		715	0.06583	0.06785		715	0.05109	0.04808		715	0.03579	0.03392		715	0.03321	0.06785		715	0.03054	0.0268		715	0.03369	0.02824
		710	0.06715	0.06934		710	0.05212	0.04918		710	0.03659	0.03469		710	0.03426	0.06934		710	0.03163	0.02741		710	0.03461	0.02889
		705	0.06845	0.07088		705	0.0531	0.05032		705	0.03728	0.03548		705	0.03517	0.07088		705	0.03218	0.02804		705	0.03552	0.02956
		700	0.06967	0.07247		700	0.05408	0.05149		700	0.03792	0.0363		700	0.03563	0.07247		700	0.03272	0.02869		700	0.03572	0.03026
		695	0.07098	0.07411		695	0.05506	0.05271		695	0.03863	0.03716		695	0.03619	0.07411		695	0.03343	0.02937		695	0.03653	0.03098
		690	0.07241	0.0758		690	0.05613	0.05398		690	0.03944	0.03804		690	0.03682	0.0758		690	0.03417	0.03007		690	0.03756	0.03173
		685	0.07388	0.07746		685	0.05731	0.05522		685	0.04021	0.03891		685	0.03757	0.07746		685	0.0345	0.03076		685	0.03854	0.03247
		680	0.07533	0.07915		680	0.05848	0.05649		680	0.04103	0.0398		680	0.03863	0.07915		680	0.03569	0.03147		680	0.03926	0.03322
		675	0.07674	0.08088		675	0.05954	0.05781		675	0.04183	0.04072		675	0.03916	0.08088		675	0.03601	0.03219		675	0.03948	0.034
		670	0.07837	0.08267		670	0.06086	0.05917		670	0.0428	0.04167		670	0.04017	0.08267		670	0.03702	0.03295		670	0.04088	0.0348
		665	0.07996	0.08452		665	0.06207	0.06058		665	0.04355	0.04265		665	0.04084	0.08452		665	0.03774	0.03373		665	0.0416	0.03563
		660	0.08149	0.08642		660	0.06325	0.06203		660	0.04442	0.04367		660	0.04126	0.08642		660	0.03821	0.03454		660	0.04202	0.0365
		655	0.08324	0.08838		655	0.06467	0.06354		655	0.04539	0.04473		655	0.04236	0.08838		655	0.03924	0.03538		655	0.04293	0.03739
		650	0.085	0.09039		650	0.06599	0.06512		650	0.04636	0.04584		650	0.04324	0.09039		650	0.03999	0.03626		650	0.04409	0.03833
		645	0.08678	0.09248		645	0.06735	0.06676		645	0.04728	0.04699		645	0.04399	0.09248		645	0.04066	0.03718		645	0.04517	0.03931
		640	0.08853	0.09462		640	0.06883	0.06846		640	0.04828	0.04819		640	0.0448	0.09462		640	0.04149	0.03813		640	0.0453	0.04033
		635	0.09055	0.09683		635	0.07034	0.07022		635	0.04941	0.04944		635	0.04581	0.09683		635	0.04252	0.03912		635	0.04672	0.04138
		630	0.09257	0.09911		630	0.07183	0.07205		630	0.05053	0.05073		630	0.04703	0.09911		630	0.04327	0.04016		630	0.04791	0.04248
		625	0.09448	0.10146		625	0.07351	0.07395		625	0.05146	0.05208		625	0.0481	0.10146		625	0.04448	0.04123		625	0.04829	0.04362
		620	0.09654	0.10389		620	0.0751	0.07592		620	0.05274	0.05347		620	0.04879	0.10389		620	0.04526	0.04235		620	0.04968	0.04481
		615	0.09868	0.10625		615	0.07682	0.07784		615	0.05394	0.05483		615	0.04985	0.10625		615	0.04627	0.04342		615	0.05025	0.04596
		610	0.10088	0.10868		610	0.07863	0.07983		610	0.05512	0.05623		610	0.05106	0.10868		610	0.04711	0.04454		610	0.05119	0.04715
		605	0.10334	0.11119		605	0.08037	0.08189		605	0.05637	0.05769		605	0.05189	0.11119		605	0.04823	0.0457		605	0.05209	0.04838
		600	0.10561	0.11377		600	0.08234	0.08402		600	0.05768	0.05921		600	0.0532	0.11377		600	0.04969	0.04691		600	0.05378	0.04966
		595	0.10826	0.11644		595	0.08431	0.08624		595	0.05903	0.06078		595	0.05456	0.11644		595	0.05089	0.04816		595	0.05554	0.05099
		590	0.1107	0.11918		590	0.0863	0.08853		590	0.06049	0.06241		590	0.05592	0.11918		590	0.05165	0.04946		590	0.05607	0.05237
		585	0.11343	0.12191		585	0.08833	0.09085		585	0.0619	0.06406		585	0.05703	0.12191		585	0.05302	0.05079		585	0.05737	0.05377
		580	0.11613	0.12472		580	0.0906	0.09325		580	0.06345	0.06577		580	0.05866	0.12472		580	0.05424	0.05216		580	0.05884	0.05522
		575	0.119	0.12763		575	0.09291	0.09574		575	0.0651	0.06756		575	0.06009	0.12763		575	0.05588	0.05358		575	0.06045	0.05672
		570	0.12185	0.13062		570	0.09507	0.09832		570	0.06651	0.0694		570	0.06139	0.13062		570	0.05664	0.05506		570	0.06126	0.05829
		565	0.12475	0.1337		565	0.09753	0.101		565	0.06819	0.07132		565	0.06278	0.1337		565	0.05798	0.0566		565	0.06298	0.05991
		560	0.12782	0.13686		560	0.09997	0.10373		560	0.0699	0.07328		560	0.0643	0.13686		560	0.0596	0.05816		560	0.06407	0.06156
		555	0.13117	0.14012		555	0.10246	0.10655		555	0.07163	0.07529		555	0.0658	0.14012		555	0.0609	0.05977		555	0.0652	0.06326
		550	0.13466	0.14349		550	0.10536	0.10948		550	0.07365	0.07738		550	0.06759	0.14349		550	0.0627	0.06145		550	0.06715	0.06503
		545	0.13798	0.14697		545	0.108	0.11253		545	0.07537	0.07956		545	0.06876	0.14697		545	0.06401	0.06319		545	0.06798	0.06686
		540	0.14175	0.15057		540	0.11096	0.11569		540	0.07754	0.08182		540	0.07113	0.15057		540	0.06593	0.065		540	0.07052	0.06878
		535	0.14558	0.1542		535	0.11402	0.11893		535	0.07958	0.08415		535	0.07268	0.1542		535	0.06731	0.06688		535	0.07227	0.07075
		530	0.14937	0.15793		530	0.11712	0.12229		530	0.08175	0.08657		530	0.07418	0.15793		530	0.06886	0.06882		530	0.07342	0.07279
		525	0.1534	0.16178		525	0.12039	0.12578		525	0.08393	0.08909		525	0.07626	0.16178		525	0.07091	0.07085		525	0.07596	0.07491
		520	0.15779	0.16576		520	0.12394	0.1294		520	0.08638	0.09171		520	0.07863	0.16576		520	0.07268	0.07296		520	0.07822	0.07711
		515	0.16221	0.16976		515	0.12749	0.13306		515	0.08888	0.09436		515	0.08058	0.16976		515	0.07498	0.07509		515	0.08013	0.07933
		510	0.16651	0.17367		510	0.1311	0.13664		510	0.0913	0.09694		510	0.08252	0.17367		510	0.07638	0.07715		510	0.08181	0.08148
		505	0.17123	0.1777		505	0.13495	0.14035		505	0.09396	0.09961		505	0.08487	0.1777		505	0.07858	0.07929		505	0.0842	0.0837
		500	0.17617	0.18186		500	0.13899	0.1442		500	0.09681	0.10239		500	0.08722	0.18186		500	0.08074	0.08151		500	0.08594	0.08599
		495	0.18132	0.18613		495	0.14309	0.14814		495	0.09946	0.10522		495	0.0895	0.18613		495	0.08278	0.08377		495	0.08834	0.08833
		490	0.18659	0.19042		490	0.14742	0.15201		490	0.10252	0.10797		490	0.09227	0.19042		490	0.08533	0.08594		490	0.09129	0.09058
		485	0.19195	0.19486		485	0.15182	0.15604		485	0.1057	0.11082		485	0.09492	0.19486		485	0.0875	0.08818		485	0.09378	0.0929
		480	0.1976	0.19946		480	0.15645	0.16022		480	0.10877	0.11378		480	0.09763	0.19946		480	0.09011	0.09051		480	0.0963	0.09531
		475	0.20322	0.20414		475	0.16124	0.16439		475	0.1119	0.11669		475	0.10047	0.20414		475	0.09269	0.09277		475	0.09913	0.09766
		470	0.20913	0.20884		470	0.1661	0.16846		470	0.11537	0.11945		470	0.10302	0.20884		470	0.0955	0.09487		470	0.10212	0.09986
		465	0.21518	0.21371		465	0.17118	0.17268		465	0.11878	0.12231		465	0.10618	0.21371		465	0.09781	0.09705		465	0.10459	0.10213
		460	0.22156	0.21877		460	0.17657	0.17708		460	0.12259	0.12527		460	0.10944	0.21877		460	0.10088	0.0993		460	0.10808	0.10448
		455	0.22814	0.22459		455	0.18203	0.1821		455	0.1261	0.12865		455	0.11231	0.22459		455	0.10397	0.10188		455	0.11084	0.1072
		450	0.23509	0.23077		450	0.18778	0.18743		450	0.13016	0.13223		450	0.11602	0.23077		450	0.10694	0.10461		450	0.11388	0.1101
		445	0.24224	0.23721		445	0.19394	0.19301		445	0.13427	0.13597		445	0.11942	0.23721		445	0.11005	0.10745		445	0.11735	0.11311
		440	0.24968	0.24394		440	0.20013	0.19884		440	0.13828	0.13986		440	0.12301	0.24394		440	0.11331	0.11041		440	0.12036	0.11624
		435	0.25755	0.25096		435	0.20683	0.20495		435	0.14307	0.14391		435	0.12722	0.25096		435	0.11695	0.11349		435	0.12453	0.1195
		430	0.26594	0.25829		430	0.21383	0.21135		430	0.14765	0.14815		430	0.13085	0.25829		430	0.1205	0.1167		430	0.12837	0.12289
		425	0.27466	0.26627		425	0.22138	0.21833		425	0.1529	0.15278		425	0.13556	0.26627		425	0.12441	0.12021		425	0.13247	0.12663
		420	0.28385	0.27495		420	0.22952	0.22598		420	0.1581	0.15785		420	0.13975	0.27495		420	0.12847	0.12407		420	0.13612	0.13074
		415	0.2938	0.28406		415	0.23802	0.23402		415	0.16395	0.16316		415	0.14462	0.28406		415	0.13301	0.12811		415	0.14157	0.13505
		410	0.30485	0.29436		410	0.24746	0.24328		410	0.17042	0.16932		410	0.15014	0.29436		410	0.13806	0.13287		410	0.14626	0.14013
		405	0.31631	0.30563		405	0.25743	0.25351		405	0.17714	0.17616		405	0.15592	0.30563		405	0.14304	0.13817		405	0.15117	0.14581
		400	0.32889	0.31753		400	0.26829	0.26438		400	0.18461	0.18339		400	0.16204	0.31753		400	0.14877	0.14379		400	0.15734	0.15183
		395	0.34245	0.33073		395	0.28046	0.27686		395	0.19288	0.19192		395	0.16929	0.33073		395	0.15457	0.15055		395	0.16347	0.159
		390	0.35656	0.34475		390	0.29358	0.29022		390	0.20144	0.20104		390	0.17554	0.34475		390	0.16074	0.1578		390	0.16859	0.16667
		385	0.37279	0.35982		385	0.30831	0.30481		385	0.21174	0.21107		385	0.18439	0.35982		385	0.16881	0.16583		385	0.17839	0.17514
		380	0.38953	0.37605		380	0.32415	0.32076		380	0.22271	0.22212		380	0.1942	0.37605		380	0.17724	0.17474		380	0.18651	0.1845
		375	0.40787	0.39348		375	0.34152	0.33804		375	0.23446	0.23412		375	0.20396	0.39348		375	0.18567	0.18448		375	0.19435	0.19467
		370	0.42766	0.41255		370	0.36001	0.35734		370	0.24754	0.24771		370	0.2146	0.41255		370	0.19553	0.19563		370	0.20554	0.20622
		365	0.44906	0.43313		365	0.38026	0.37826		365	0.2619	0.26245		365	0.22699	0.43313		365	0.2062	0.20776		365	0.2152	0.21873
		360	0.47094	0.45471		360	0.40259	0.40041		360	0.2775	0.2782		360	0.23903	0.45471		360	0.21728	0.22074		360	0.22532	0.23191
		355	0.49543	0.47806		355	0.42701	0.42442		355	0.29458	0.2953		355	0.25394	0.47806		355	0.23017	0.23481		355	0.23917	0.24612
		350	0.52013	0.50292		350	0.45287	0.4501		350	0.31319	0.31379		350	0.26791	0.50292		350	0.24306	0.24995		350	0.2516	0.26115
		345	0.54661	0.52989		345	0.48211	0.47794		345	0.33325	0.33391		345	0.28501	0.52989		345	0.25774	0.26631		345	0.26602	0.27724
		340	0.5748	0.55893		340	0.5119	0.5079		340	0.35568	0.35576		340	0.30386	0.55893		340	0.27281	0.28387		340	0.27889	0.29424
		335	0.60452	0.59051		335	0.54374	0.5404		335	0.3802	0.37965		335	0.32329	0.59051		335	0.29176	0.30278		335	0.29686	0.31235
		330	0.63607	0.62321		330	0.57818	0.57371		330	0.40612	0.40399		330	0.34371	0.62321		330	0.30914	0.32158		330	0.31427	0.33025
		325	0.66763	0.65848		325	0.61441	0.60966		325	0.43411	0.43067		325	0.36815	0.65848		325	0.32915	0.34179		325	0.33175	0.34926
		320	0.69971	0.69571		320	0.6516	0.64774		320	0.46428	0.45971		320	0.39334	0.69571		320	0.35205	0.36326		320	0.3525	0.36911
		315	0.73305	0.73479		315	0.69063	0.68797		315	0.49761	0.4916		315	0.42017	0.73479		315	0.37532	0.38626		315	0.37604	0.39003
		310	0.7659	0.77514		310	0.73146	0.72998		310	0.53205	0.52666		310	0.44954	0.77514		310	0.3995	0.41095		310	0.39884	0.41216
		305	0.7975	0.81382		305	0.77052	0.77052		305	0.56913	0.56175		305	0.48169	0.81382		305	0.42651	0.43502		305	0.4245	0.43361
		300	0.82991	0.85032		300	0.81047	0.80971		300	0.60924	0.599		300	0.51483	0.85032		300	0.45754	0.46018		300	0.45022	0.45564
		295	0.86093	0.88246		295	0.84815	0.84554		295	0.65033	0.63774		295	0.54956	0.88246		295	0.48825	0.4863		295	0.47964	0.47815
		290	0.89113	0.91442		290	0.88175	0.88241		290	0.69133	0.68127		290	0.58928	0.91442		290	0.52286	0.51611		290	0.51161	0.50387
		285	0.9164	0.94718		285	0.90912	0.92153		285	0.73502	0.73171		285	0.62917	0.94718		285	0.55841	0.55135		285	0.54194	0.5343
		280	0.94026	0.97472		280	0.93473	0.95653		280	0.77903	0.78478		280	0.66902	0.97472		280	0.59427	0.58972		280	0.57529	0.56731
		275	0.96251	0.99071		275	0.9543	0.98025		275	0.81967	0.83316		275	0.71023	0.99071		275	0.63226	0.62743		275	0.60885	0.59975
		270	0.97688	1		270	0.9717	0.99778		270	0.86127	0.88105		270	0.75216	1		270	0.67206	0.66873		270	0.64459	0.63556
		265	0.9883	0.99449		265	0.98619	0.99961		265	0.89864	0.91548		265	0.79359	0.99449		265	0.71138	0.70657		265	0.68061	0.66916
		260	0.99805	0.98848		260	0.99462	1		260	0.93265	0.94434		260	0.83184	0.98848		260	0.74985	0.74305		260	0.71512	0.70241
		255	1	0.97962		255	0.99952	0.99723		255	0.96048	0.96835		255	0.86779	0.97962		255	0.78796	0.78119		255	0.74992	0.73829
		250	0.99682	0.97001		250	0.99764	0.99276		250	0.98202	0.98511		250	0.8972	0.97001		250	0.82064	0.81647		250	0.77831	0.7728
		245	0.98963	0.96041		245	0.99883	0.98756		245	0.99525	0.99582		245	0.92161	0.96041		245	0.84976	0.84921		245	0.80818	0.80628
		240	0.97734	0.95026		240	1	0.98121		240	1	1		240	0.9383	0.95026		240	0.87357	0.87913		240	0.83341	0.83876
		235	0.96294	0.94079		235	0.99254	0.97454		235	0.99963	0.99766		235	0.95005	0.94079		235	0.8931	0.90182		235	0.85411	0.86551
		230	0.94818	0.93234		230	0.9852	0.96818		230	0.99266	0.99104		230	0.95653	0.93234		230	0.90967	0.91858		230	0.87462	0.88738
		225	0.93633	0.93022		225	0.97886	0.9684		225	0.98561	0.98988		225	0.96206	0.93022		225	0.92265	0.93888		225	0.89314	0.91277
		220	0.92522	0.92994		220	0.97699	0.97017		220	0.98482	0.98747		220	0.97132	0.92994		220	0.94147	0.95647		220	0.91949	0.93613
		215	0.92038	0.93095		215	0.97465	N/A		215	0.98229	0.98352		215	0.98177	0.93095		215	0.96133	0.97039		215	0.94423	0.95629
		210	0.91777	N/A		210	0.96707	N/A		210	0.97798	0.98567		210	0.99268	0.93882		210	0.98415	0.99097		210	0.97494	0.98391
		205	0.90896	N/A		205	0.96232	N/A		205	0.97401	0.98091		205	1	0.94357		205	1	1		205	1	1
		200	0.89567	N/A		200	0.95721	N/A		200	0.95706	0.95598		200	0.99488	N/A		200	1.00543	N/A		200	1.01421	N/A
		195	0.87949	N/A		195	0.93808	N/A		195	0.93482	N/A		195	0.9783	N/A		195	0.99915	N/A		195	1.01995	N/A
		190	0.86034	N/A		190	0.91098	N/A		190	0.90696	N/A		190	0.95398	N/A		190	0.98511	N/A		190	1.00051	N/A

## Sheet: Figure 1G
			NPs size	Standar deviation	LSP peak (experiment)		NPs size	LSP peak (Mie model)
			nm	nm	nm		nm	nm
			44.7679	14.7613	256		45	270
			37.53	13.2263	251		40	262
			31.7748	12.0286	239.5		35	251
			28.5888	9.58599	205.5		30	242
			22.5172	8.16819	200		25	233
			18.8848	8.04814	194.5		22.5	220
							20	211
							15	207

## Sheet: Figure 2A
					PEG-Au NPs				PEG-Ag NPs				PEG-Rh NPs
					Aqua Regia	DLSP	Error		Aqua Regia	DLSP	Error		Aqua Regia	DLSP	Error
					v/v %	%	%		v/v %	%	%		v/v %	%	%
					0	0	0		0	0	0		0	0	0
					2.17	-23.3373	3.7547		2.17	-87.5084	0.54906		2.17	-17.1075	2.3794
					5.26	-58.1206	6.29327		5.26	-91.2696	2.25969		5.26	-21.9897	7.36183
					10	-97.6856	1.27714		10	-96.8331	1.79789		10	-34.843	3.34663

## Sheet: Figure 2C
				PEG-Au NPs				PEG-Rh NPs
				Before	After 30' at 500°C			Before	After 30' at 500°C
			Wavelength	Absorbance	Absorbance		Wavelength	Absorbance	Absorbance
			nm	a.u.	a.u.		nm	a.u.	a.u.
			1200	0.11819	0.00657		1200	0.03898	0.11582
			1199.5	0.11831	0.00659		1199.5	0.03903	0.11583
			1199	0.11844	0.00669		1199	0.03902	0.11589
			1198.5	0.11855	0.00674		1198.5	0.03905	0.11591
			1198	0.1186	0.0068		1198	0.03904	0.11593
			1197.5	0.11876	0.00682		1197.5	0.0391	0.11595
			1197	0.11878	0.00688		1197	0.03912	0.11608
			1196.5	0.11887	0.007		1196.5	0.03913	0.11603
			1196	0.11902	0.00703		1196	0.0392	0.11607
			1195.5	0.1191	0.00708		1195.5	0.03928	0.11608
			1195	0.11915	0.00713		1195	0.03932	0.11607
			1194.5	0.11926	0.00723		1194.5	0.03937	0.11611
			1194	0.11933	0.00729		1194	0.03942	0.11616
			1193.5	0.11943	0.00736		1193.5	0.03954	0.11627
			1193	0.11951	0.00741		1193	0.03952	0.11634
			1192.5	0.11961	0.00745		1192.5	0.03956	0.1164
			1192	0.11972	0.00755		1192	0.03962	0.1164
			1191.5	0.11979	0.00761		1191.5	0.03966	0.11647
			1191	0.11981	0.0077		1191	0.03975	0.1165
			1190.5	0.11984	0.00776		1190.5	0.03972	0.11646
			1190	0.11995	0.00786		1190	0.03969	0.11655
			1189.5	0.12005	0.00791		1189.5	0.03974	0.1166
			1189	0.12014	0.00799		1189	0.03978	0.11665
			1188.5	0.12028	0.00805		1188.5	0.03984	0.11668
			1188	0.12034	0.00813		1188	0.03991	0.11666
			1187.5	0.12045	0.00828		1187.5	0.03999	0.11668
			1187	0.12051	0.00833		1187	0.04003	0.11671
			1186.5	0.12063	0.00839		1186.5	0.04002	0.11671
			1186	0.12072	0.00849		1186	0.0401	0.11676
			1185.5	0.12081	0.00854		1185.5	0.04016	0.11675
			1185	0.12088	0.00858		1185	0.04021	0.11679
			1184.5	0.12102	0.00863		1184.5	0.04026	0.1168
			1184	0.12103	0.00875		1184	0.04028	0.11681
			1183.5	0.12112	0.00884		1183.5	0.04032	0.11687
			1183	0.12121	0.00887		1183	0.04044	0.11693
			1182.5	0.12127	0.0089		1182.5	0.04043	0.11695
			1182	0.1214	0.00901		1182	0.04048	0.11696
			1181.5	0.12145	0.00907		1181.5	0.0405	0.11701
			1181	0.12156	0.00915		1181	0.04058	0.11699
			1180.5	0.12167	0.00918		1180.5	0.04061	0.11708
			1180	0.12176	0.00925		1180	0.04061	0.11715
			1179.5	0.12185	0.00928		1179.5	0.04061	0.11718
			1179	0.12199	0.00933		1179	0.0406	0.11724
			1178.5	0.12206	0.00938		1178.5	0.04063	0.1173
			1178	0.12209	0.00947		1178	0.04067	0.11726
			1177.5	0.12222	0.0095		1177.5	0.04064	0.11722
			1177	0.12227	0.00963		1177	0.04073	0.11731
			1176.5	0.12229	0.00965		1176.5	0.04077	0.11726
			1176	0.1224	0.00973		1176	0.0408	0.11732
			1175.5	0.1225	0.0098		1175.5	0.04085	0.11738
			1175	0.12269	0.00985		1175	0.04085	0.1174
			1174.5	0.12281	0.00993		1174.5	0.04091	0.11745
			1174	0.12293	0.01008		1174	0.04099	0.11745
			1173.5	0.12302	0.01015		1173.5	0.04099	0.11742
			1173	0.12308	0.01019		1173	0.04103	0.11747
			1172.5	0.12319	0.01025		1172.5	0.04107	0.11751
			1172	0.12331	0.01031		1172	0.04106	0.11756
			1171.5	0.1234	0.01039		1171.5	0.04106	0.11767
			1171	0.12349	0.0105		1171	0.0411	0.11773
			1170.5	0.12364	0.01055		1170.5	0.04111	0.11784
			1170	0.12372	0.01064		1170	0.0411	0.11784
			1169.5	0.12381	0.0107		1169.5	0.04107	0.11794
			1169	0.12394	0.01075		1169	0.04109	0.11793
			1168.5	0.124	0.01079		1168.5	0.04109	0.11792
			1168	0.12415	0.01086		1168	0.04114	0.11798
			1167.5	0.12426	0.01091		1167.5	0.04117	0.11797
			1167	0.12437	0.01104		1167	0.04113	0.118
			1166.5	0.12448	0.01115		1166.5	0.04115	0.11806
			1166	0.12462	0.01123		1166	0.04124	0.11813
			1165.5	0.12477	0.01134		1165.5	0.04126	0.11822
			1165	0.12488	0.0114		1165	0.04126	0.11825
			1164.5	0.12502	0.01154		1164.5	0.04128	0.11833
			1164	0.1251	0.01164		1164	0.04132	0.11827
			1163.5	0.12524	0.01177		1163.5	0.04132	0.11834
			1163	0.12536	0.01188		1163	0.04135	0.11838
			1162.5	0.12554	0.01194		1162.5	0.04137	0.11845
			1162	0.12572	0.01204		1162	0.04141	0.1185
			1161.5	0.12589	0.01212		1161.5	0.04145	0.11851
			1161	0.12604	0.01211		1161	0.04145	0.11848
			1160.5	0.12627	0.01218		1160.5	0.04144	0.11857
			1160	0.12638	0.01221		1160	0.04148	0.11857
			1159.5	0.12649	0.01232		1159.5	0.04149	0.1186
			1159	0.12659	0.01236		1159	0.04156	0.11866
			1158.5	0.12673	0.01249		1158.5	0.04162	0.11868
			1158	0.12684	0.01246		1158	0.04167	0.11874
			1157.5	0.12698	0.01253		1157.5	0.04168	0.11886
			1157	0.12714	0.01255		1157	0.04169	0.11885
			1156.5	0.12732	0.01263		1156.5	0.04168	0.11884
			1156	0.12743	0.01267		1156	0.04173	0.11882
			1155.5	0.12754	0.0127		1155.5	0.04172	0.11879
			1155	0.12769	0.01267		1155	0.04174	0.11874
			1154.5	0.12779	0.01274		1154.5	0.04179	0.11881
			1154	0.12796	0.01274		1154	0.04182	0.11883
			1153.5	0.12811	0.01288		1153.5	0.04186	0.11886
			1153	0.12824	0.01294		1153	0.04186	0.11892
			1152.5	0.12842	0.01302		1152.5	0.04192	0.11895
			1152	0.12859	0.01301		1152	0.04201	0.11897
			1151.5	0.12875	0.01308		1151.5	0.04205	0.11906
			1151	0.12889	0.01303		1151	0.04213	0.11906
			1150.5	0.12905	0.013		1150.5	0.04222	0.11912
			1150	0.12915	0.01299		1150	0.04218	0.11915
			1149.5	0.12931	0.01302		1149.5	0.04221	0.11914
			1149	0.1295	0.01304		1149	0.04224	0.11917
			1148.5	0.12965	0.01297		1148.5	0.04231	0.1192
			1148	0.12981	0.01295		1148	0.04234	0.1193
			1147.5	0.12999	0.01295		1147.5	0.04241	0.11936
			1147	0.13017	0.01296		1147	0.04241	0.11939
			1146.5	0.13028	0.01299		1146.5	0.0424	0.1194
			1146	0.13042	0.01293		1146	0.0424	0.11947
			1145.5	0.13053	0.01292		1145.5	0.04245	0.11958
			1145	0.13068	0.01293		1145	0.04248	0.1196
			1144.5	0.13075	0.01292		1144.5	0.04248	0.11966
			1144	0.13086	0.01288		1144	0.04247	0.11977
			1143.5	0.13097	0.01289		1143.5	0.04248	0.11985
			1143	0.13116	0.01287		1143	0.04247	0.11988
			1142.5	0.13129	0.01281		1142.5	0.0425	0.11998
			1142	0.1314	0.01288		1142	0.04244	0.12003
			1141.5	0.13149	0.01292		1141.5	0.04254	0.12002
			1141	0.1316	0.01291		1141	0.04257	0.12006
			1140.5	0.13166	0.0129		1140.5	0.04266	0.12011
			1140	0.13177	0.01289		1140	0.04267	0.12026
			1139.5	0.1319	0.01285		1139.5	0.04272	0.12028
			1139	0.13203	0.01286		1139	0.04273	0.12038
			1138.5	0.13217	0.0129		1138.5	0.04276	0.12037
			1138	0.13221	0.01289		1138	0.0428	0.12049
			1137.5	0.13228	0.01282		1137.5	0.04287	0.1206
			1137	0.1324	0.01281		1137	0.04286	0.12065
			1136.5	0.1325	0.01278		1136.5	0.04289	0.12073
			1136	0.13258	0.01285		1136	0.04288	0.12078
			1135.5	0.13265	0.01279		1135.5	0.04293	0.12074
			1135	0.13276	0.01289		1135	0.04295	0.12072
			1134.5	0.13286	0.01293		1134.5	0.04293	0.1207
			1134	0.13301	0.01293		1134	0.04298	0.12072
			1133.5	0.13303	0.01293		1133.5	0.04303	0.12073
			1133	0.13314	0.01298		1133	0.04303	0.12077
			1132.5	0.13322	0.01299		1132.5	0.04305	0.12079
			1132	0.13335	0.01303		1132	0.04308	0.12084
			1131.5	0.13336	0.01297		1131.5	0.04309	0.12081
			1131	0.13342	0.01297		1131	0.04316	0.12085
			1130.5	0.13353	0.01293		1130.5	0.04323	0.12088
			1130	0.13369	0.01298		1130	0.04328	0.12092
			1129.5	0.13378	0.01298		1129.5	0.04331	0.12098
			1129	0.13392	0.01306		1129	0.04333	0.12109
			1128.5	0.13404	0.01312		1128.5	0.04341	0.12107
			1128	0.13416	0.0132		1128	0.04348	0.12108
			1127.5	0.13435	0.01317		1127.5	0.04351	0.12102
			1127	0.13444	0.01325		1127	0.04355	0.12104
			1126.5	0.13453	0.01318		1126.5	0.04355	0.12105
			1126	0.13467	0.01321		1126	0.04361	0.12107
			1125.5	0.13483	0.01315		1125.5	0.04358	0.12107
			1125	0.13498	0.01324		1125	0.04364	0.12114
			1124.5	0.13508	0.01324		1124.5	0.04363	0.12111
			1124	0.13523	0.01329		1124	0.04366	0.12113
			1123.5	0.13536	0.01329		1123.5	0.0438	0.1212
			1123	0.13543	0.01336		1123	0.04382	0.1212
			1122.5	0.13551	0.01329		1122.5	0.04383	0.12123
			1122	0.13568	0.01338		1122	0.0438	0.12124
			1121.5	0.13582	0.01343		1121.5	0.04385	0.12125
			1121	0.13594	0.01345		1121	0.04393	0.12128
			1120.5	0.13606	0.0135		1120.5	0.04395	0.12131
			1120	0.13619	0.01348		1120	0.04401	0.12135
			1119.5	0.13639	0.01351		1119.5	0.04408	0.12146
			1119	0.1365	0.01345		1119	0.04405	0.12155
			1118.5	0.13669	0.01347		1118.5	0.04412	0.12159
			1118	0.1368	0.01353		1118	0.04411	0.12158
			1117.5	0.13698	0.01353		1117.5	0.04412	0.12169
			1117	0.13708	0.0135		1117	0.0442	0.12171
			1116.5	0.13722	0.01357		1116.5	0.04425	0.12179
			1116	0.13738	0.01361		1116	0.0443	0.12179
			1115.5	0.13755	0.01373		1115.5	0.04436	0.12186
			1115	0.13768	0.01374		1115	0.04442	0.12186
			1114.5	0.13789	0.01385		1114.5	0.04442	0.1219
			1114	0.13801	0.01389		1114	0.04445	0.12192
			1113.5	0.13818	0.01391		1113.5	0.04445	0.12193
			1113	0.13826	0.01395		1113	0.04455	0.12198
			1112.5	0.13843	0.01396		1112.5	0.04455	0.1221
			1112	0.13851	0.01402		1112	0.04462	0.12213
			1111.5	0.13864	0.01411		1111.5	0.04469	0.12216
			1111	0.1388	0.01411		1111	0.04476	0.12225
			1110.5	0.13898	0.01426		1110.5	0.04478	0.12228
			1110	0.1391	0.01428		1110	0.04488	0.12233
			1109.5	0.13921	0.01437		1109.5	0.04495	0.12244
			1109	0.13936	0.01437		1109	0.04497	0.12243
			1108.5	0.1395	0.01441		1108.5	0.04505	0.1225
			1108	0.13961	0.01445		1108	0.04508	0.12246
			1107.5	0.13981	0.01457		1107.5	0.04495	0.12253
			1107	0.13999	0.01456		1107	0.04503	0.12259
			1106.5	0.14026	0.01473		1106.5	0.04509	0.12263
			1106	0.1404	0.01476		1106	0.04514	0.12266
			1105.5	0.14056	0.01478		1105.5	0.04512	0.12261
			1105	0.14064	0.01478		1105	0.04517	0.12266
			1104.5	0.14082	0.01488		1104.5	0.04514	0.12269
			1104	0.14092	0.01492		1104	0.04521	0.12278
			1103.5	0.14105	0.01499		1103.5	0.04519	0.12276
			1103	0.14118	0.015		1103	0.04525	0.12277
			1102.5	0.14126	0.01505		1102.5	0.04526	0.12283
			1102	0.14136	0.01511		1102	0.04537	0.12291
			1101.5	0.14144	0.01521		1101.5	0.04542	0.12297
			1101	0.1416	0.01528		1101	0.04551	0.12305
			1100.5	0.14175	0.01532		1100.5	0.04552	0.12304
			1100	0.14187	0.01534		1100	0.04555	0.1231
			1099.5	0.14206	0.01531		1099.5	0.04556	0.12316
			1099	0.14221	0.01537		1099	0.04556	0.12323
			1098.5	0.14231	0.01537		1098.5	0.04566	0.12321
			1098	0.14242	0.01537		1098	0.0457	0.12322
			1097.5	0.14249	0.01541		1097.5	0.04572	0.12321
			1097	0.14265	0.01542		1097	0.04572	0.12317
			1096.5	0.1427	0.01548		1096.5	0.0458	0.12317
			1096	0.14292	0.01553		1096	0.04577	0.12321
			1095.5	0.14305	0.01551		1095.5	0.04578	0.12331
			1095	0.14318	0.01558		1095	0.04581	0.12333
			1094.5	0.14328	0.01559		1094.5	0.04584	0.12337
			1094	0.14343	0.01559		1094	0.04582	0.12344
			1093.5	0.14355	0.01562		1093.5	0.04583	0.12339
			1093	0.14373	0.01559		1093	0.04587	0.12355
			1092.5	0.14385	0.01567		1092.5	0.04587	0.12365
			1092	0.14403	0.01571		1092	0.04593	0.1237
			1091.5	0.14415	0.01574		1091.5	0.04604	0.12375
			1091	0.1443	0.01579		1091	0.04606	0.12382
			1090.5	0.14436	0.01577		1090.5	0.04607	0.12388
			1090	0.14453	0.01585		1090	0.04617	0.12394
			1089.5	0.14466	0.01588		1089.5	0.04622	0.12399
			1089	0.1449	0.01598		1089	0.04625	0.12409
			1088.5	0.14499	0.01597		1088.5	0.04639	0.12415
			1088	0.14523	0.016		1088	0.04636	0.12418
			1087.5	0.14536	0.01608		1087.5	0.04632	0.12427
			1087	0.14562	0.01611		1087	0.04634	0.12436
			1086.5	0.14578	0.01619		1086.5	0.04638	0.12437
			1086	0.14593	0.01623		1086	0.04639	0.12438
			1085.5	0.14614	0.01625		1085.5	0.04641	0.12433
			1085	0.14628	0.0163		1085	0.04637	0.12438
			1084.5	0.1464	0.01635		1084.5	0.04644	0.12444
			1084	0.1465	0.01645		1084	0.04644	0.12448
			1083.5	0.14665	0.01652		1083.5	0.0465	0.12453
			1083	0.14686	0.01661		1083	0.04652	0.12459
			1082.5	0.14692	0.01666		1082.5	0.04651	0.12463
			1082	0.14708	0.01679		1082	0.04654	0.12468
			1081.5	0.14726	0.01686		1081.5	0.04664	0.12477
			1081	0.14739	0.01692		1081	0.04666	0.1248
			1080.5	0.1476	0.01694		1080.5	0.04668	0.12485
			1080	0.14776	0.01702		1080	0.04676	0.12495
			1079.5	0.14788	0.0171		1079.5	0.04677	0.12497
			1079	0.14801	0.01716		1079	0.04684	0.12499
			1078.5	0.14816	0.01718		1078.5	0.04691	0.12504
			1078	0.14833	0.01725		1078	0.04696	0.12504
			1077.5	0.14857	0.01733		1077.5	0.04701	0.12518
			1077	0.14871	0.01745		1077	0.04705	0.12517
			1076.5	0.14894	0.01747		1076.5	0.04712	0.12518
			1076	0.14904	0.01753		1076	0.04715	0.12531
			1075.5	0.14916	0.01752		1075.5	0.04715	0.12528
			1075	0.14931	0.01765		1075	0.04716	0.12526
			1074.5	0.14949	0.01766		1074.5	0.0472	0.12529
			1074	0.14964	0.01764		1074	0.04718	0.12533
			1073.5	0.14979	0.0177		1073.5	0.04721	0.12537
			1073	0.14992	0.01781		1073	0.04726	0.12531
			1072.5	0.1501	0.01785		1072.5	0.04725	0.12532
			1072	0.15024	0.01792		1072	0.04733	0.1254
			1071.5	0.15039	0.01796		1071.5	0.04738	0.1254
			1071	0.15045	0.01809		1071	0.04743	0.12543
			1070.5	0.15061	0.01806		1070.5	0.04743	0.12554
			1070	0.15083	0.0181		1070	0.04749	0.12559
			1069.5	0.15095	0.01813		1069.5	0.0475	0.12571
			1069	0.1511	0.01815		1069	0.04754	0.12569
			1068.5	0.15129	0.0182		1068.5	0.04757	0.12578
			1068	0.15145	0.01824		1068	0.04756	0.12585
			1067.5	0.15159	0.01825		1067.5	0.04762	0.1259
			1067	0.15169	0.01827		1067	0.04763	0.12589
			1066.5	0.15199	0.01831		1066.5	0.04769	0.12608
			1066	0.15212	0.01832		1066	0.04769	0.12611
			1065.5	0.15229	0.01836		1065.5	0.04771	0.12619
			1065	0.15246	0.01842		1065	0.04774	0.12624
			1064.5	0.15265	0.01846		1064.5	0.04774	0.12627
			1064	0.1528	0.01841		1064	0.04779	0.1263
			1063.5	0.15299	0.01846		1063.5	0.04787	0.12638
			1063	0.15316	0.0185		1063	0.0479	0.12642
			1062.5	0.15337	0.01858		1062.5	0.0479	0.12647
			1062	0.15351	0.01863		1062	0.04794	0.12646
			1061.5	0.1536	0.0187		1061.5	0.04799	0.1265
			1061	0.15373	0.01873		1061	0.04803	0.12645
			1060.5	0.15391	0.01886		1060.5	0.04803	0.1266
			1060	0.15409	0.01888		1060	0.04812	0.12646
			1059.5	0.15428	0.019		1059.5	0.04817	0.12656
			1059	0.1544	0.01899		1059	0.04823	0.12658
			1058.5	0.15451	0.01904		1058.5	0.04829	0.12674
			1058	0.15461	0.01914		1058	0.04841	0.12674
			1057.5	0.15481	0.01922		1057.5	0.04845	0.12676
			1057	0.15499	0.01921		1057	0.04849	0.12683
			1056.5	0.15519	0.0193		1056.5	0.04853	0.12681
			1056	0.1553	0.01937		1056	0.04857	0.12674
			1055.5	0.15548	0.01937		1055.5	0.0486	0.12686
			1055	0.15566	0.01938		1055	0.0487	0.12692
			1054.5	0.15589	0.01949		1054.5	0.04873	0.12695
			1054	0.15605	0.01954		1054	0.04874	0.12698
			1053.5	0.15628	0.01962		1053.5	0.04876	0.12695
			1053	0.15648	0.01969		1053	0.04877	0.12696
			1052.5	0.15665	0.01972		1052.5	0.04886	0.12692
			1052	0.15682	0.01979		1052	0.049	0.12694
			1051.5	0.15699	0.01986		1051.5	0.04899	0.12694
			1051	0.15715	0.01991		1051	0.04908	0.12702
			1050.5	0.15725	0.01994		1050.5	0.04912	0.12701
			1050	0.15747	0.02006		1050	0.04926	0.12712
			1049.5	0.15769	0.02013		1049.5	0.04925	0.12713
			1049	0.1579	0.02019		1049	0.04933	0.12715
			1048.5	0.15807	0.02028		1048.5	0.04943	0.12726
			1048	0.15825	0.02038		1048	0.04943	0.12728
			1047.5	0.15835	0.0204		1047.5	0.04937	0.12721
			1047	0.15853	0.02052		1047	0.04946	0.12726
			1046.5	0.15871	0.02057		1046.5	0.04948	0.12723
			1046	0.15896	0.02054		1046	0.04952	0.12734
			1045.5	0.15916	0.0206		1045.5	0.04956	0.12735
			1045	0.15932	0.02072		1045	0.04955	0.12741
			1044.5	0.15942	0.02071		1044.5	0.04956	0.12738
			1044	0.15964	0.02081		1044	0.04958	0.12759
			1043.5	0.15978	0.02086		1043.5	0.04958	0.12754
			1043	0.16006	0.02098		1043	0.0496	0.12766
			1042.5	0.16031	0.02103		1042.5	0.04957	0.12753
			1042	0.16058	0.02104		1042	0.04956	0.12754
			1041.5	0.16072	0.02108		1041.5	0.04963	0.1276
			1041	0.16087	0.02114		1041	0.04968	0.12771
			1040.5	0.16104	0.0212		1040.5	0.04972	0.12777
			1040	0.16128	0.02123		1040	0.04974	0.12792
			1039.5	0.16144	0.02132		1039.5	0.04979	0.1279
			1039	0.16164	0.02151		1039	0.04978	0.12797
			1038.5	0.16182	0.02155		1038.5	0.0498	0.12803
			1038	0.162	0.02165		1038	0.04985	0.12808
			1037.5	0.16213	0.02166		1037.5	0.04994	0.12822
			1037	0.16226	0.02176		1037	0.05001	0.12832
			1036.5	0.16244	0.02183		1036.5	0.04996	0.12837
			1036	0.16266	0.02187		1036	0.05	0.12838
			1035.5	0.16283	0.02194		1035.5	0.05007	0.12838
			1035	0.16301	0.02204		1035	0.0501	0.12839
			1034.5	0.16325	0.02205		1034.5	0.05016	0.12838
			1034	0.1634	0.02218		1034	0.05019	0.12842
			1033.5	0.16358	0.02226		1033.5	0.05029	0.12843
			1033	0.16372	0.02233		1033	0.05032	0.12846
			1032.5	0.1639	0.02235		1032.5	0.05036	0.12858
			1032	0.16403	0.02246		1032	0.05046	0.12853
			1031.5	0.16427	0.02246		1031.5	0.05059	0.12864
			1031	0.1644	0.02243		1031	0.05056	0.12867
			1030.5	0.16458	0.02255		1030.5	0.05065	0.12883
			1030	0.16472	0.02272		1030	0.05076	0.12886
			1029.5	0.16494	0.02271		1029.5	0.0508	0.12878
			1029	0.16513	0.02276		1029	0.05091	0.12889
			1028.5	0.16545	0.02286		1028.5	0.05097	0.12894
			1028	0.16563	0.02294		1028	0.05098	0.1289
			1027.5	0.16587	0.02295		1027.5	0.05106	0.12893
			1027	0.166	0.02296		1027	0.05119	0.12888
			1026.5	0.16618	0.02305		1026.5	0.05129	0.129
			1026	0.16637	0.02318		1026	0.05134	0.12914
			1025.5	0.16666	0.02322		1025.5	0.05135	0.12927
			1025	0.16684	0.02339		1025	0.05138	0.12924
			1024.5	0.16707	0.02335		1024.5	0.05134	0.12938
			1024	0.16723	0.02346		1024	0.05139	0.12936
			1023.5	0.16747	0.02347		1023.5	0.05145	0.12944
			1023	0.16767	0.02348		1023	0.05151	0.1293
			1022.5	0.16788	0.02351		1022.5	0.05157	0.12938
			1022	0.16811	0.02361		1022	0.05167	0.12943
			1021.5	0.16833	0.02365		1021.5	0.05166	0.1294
			1021	0.16855	0.02377		1021	0.0517	0.12935
			1020.5	0.16886	0.02383		1020.5	0.05179	0.12945
			1020	0.16899	0.024		1020	0.05189	0.12952
			1019.5	0.16918	0.02413		1019.5	0.05195	0.12969
			1019	0.16936	0.02417		1019	0.05208	0.12972
			1018.5	0.16955	0.02432		1018.5	0.05207	0.12986
			1018	0.1697	0.02433		1018	0.05211	0.1299
			1017.5	0.16995	0.02436		1017.5	0.0521	0.12999
			1017	0.17011	0.02441		1017	0.0522	0.13012
			1016.5	0.1704	0.02453		1016.5	0.05216	0.13006
			1016	0.17054	0.02464		1016	0.05219	0.13009
			1015.5	0.17079	0.02476		1015.5	0.0522	0.13014
			1015	0.17102	0.02493		1015	0.05224	0.13005
			1014.5	0.17131	0.02497		1014.5	0.05217	0.13015
			1014	0.17151	0.02509		1014	0.05213	0.13005
			1013.5	0.17177	0.02511		1013.5	0.05206	0.13028
			1013	0.17193	0.02518		1013	0.05207	0.13023
			1012.5	0.1721	0.02526		1012.5	0.05212	0.13033
			1012	0.1723	0.02529		1012	0.05217	0.13034
			1011.5	0.17247	0.02544		1011.5	0.05214	0.13044
			1011	0.17266	0.02556		1011	0.05212	0.13059
			1010.5	0.17281	0.02558		1010.5	0.05216	0.13073
			1010	0.17302	0.02561		1010	0.05216	0.13067
			1009.5	0.17315	0.02577		1009.5	0.05216	0.13067
			1009	0.17336	0.02587		1009	0.05229	0.13064
			1008.5	0.17353	0.02604		1008.5	0.0524	0.13072
			1008	0.17371	0.02613		1008	0.0525	0.13071
			1007.5	0.17389	0.02624		1007.5	0.05247	0.13076
			1007	0.17402	0.02625		1007	0.05255	0.13081
			1006.5	0.17421	0.02639		1006.5	0.0526	0.13093
			1006	0.17432	0.02642		1006	0.05258	0.13109
			1005.5	0.17459	0.02657		1005.5	0.05266	0.13123
			1005	0.17475	0.02652		1005	0.05277	0.13137
			1004.5	0.17498	0.02663		1004.5	0.05272	0.13134
			1004	0.17535	0.02661		1004	0.05271	0.13139
			1003.5	0.17561	0.02669		1003.5	0.05265	0.13138
			1003	0.1759	0.02684		1003	0.05263	0.13142
			1002.5	0.17609	0.02693		1002.5	0.0527	0.13147
			1002	0.17638	0.027		1002	0.05274	0.13143
			1001.5	0.17655	0.02707		1001.5	0.05265	0.1315
			1001	0.17683	0.02717		1001	0.05265	0.1315
			1000.5	0.17696	0.02727		1000.5	0.05274	0.13163
			1000	0.17726	0.02729		1000	0.05274	0.13176
			999.5	0.17755	0.02746		999.5	0.05281	0.13181
			999	0.17783	0.02757		999	0.05293	0.13198
			998.5	0.17796	0.02764		998.5	0.05302	0.13199
			998	0.17817	0.02762		998	0.05315	0.13213
			997.5	0.17827	0.02778		997.5	0.05318	0.1321
			997	0.17849	0.02791		997	0.05324	0.13221
			996.5	0.17869	0.02783		996.5	0.05331	0.13226
			996	0.17898	0.02788		996	0.05333	0.13232
			995.5	0.17924	0.02795		995.5	0.05336	0.13238
			995	0.17947	0.02802		995	0.05343	0.13241
			994.5	0.17973	0.02823		994.5	0.05341	0.13234
			994	0.17988	0.02837		994	0.05353	0.13241
			993.5	0.18006	0.02833		993.5	0.05362	0.13249
			993	0.18034	0.02834		993	0.05358	0.13266
			992.5	0.18062	0.02835		992.5	0.05366	0.13269
			992	0.18082	0.02846		992	0.0536	0.13269
			991.5	0.18102	0.02849		991.5	0.05377	0.13272
			991	0.18133	0.02871		991	0.05382	0.13292
			990.5	0.18146	0.02875		990.5	0.05384	0.13285
			990	0.18171	0.02882		990	0.05398	0.13287
			989.5	0.18186	0.02893		989.5	0.05395	0.13281
			989	0.18226	0.02916		989	0.05398	0.13277
			988.5	0.18237	0.02919		988.5	0.05407	0.13289
			988	0.18257	0.02931		988	0.05414	0.1329
			987.5	0.18285	0.02935		987.5	0.05419	0.13298
			987	0.18302	0.02941		987	0.05428	0.13304
			986.5	0.18325	0.02947		986.5	0.05434	0.13302
			986	0.18346	0.02955		986	0.05442	0.13319
			985.5	0.18372	0.02966		985.5	0.05453	0.13317
			985	0.18393	0.02982		985	0.05458	0.1332
			984.5	0.18418	0.02985		984.5	0.05456	0.13315
			984	0.18436	0.02999		984	0.0546	0.1332
			983.5	0.18446	0.03002		983.5	0.05468	0.13323
			983	0.18466	0.03001		983	0.05466	0.13329
			982.5	0.18492	0.03006		982.5	0.05483	0.13331
			982	0.18517	0.0302		982	0.05484	0.13344
			981.5	0.1855	0.0303		981.5	0.05493	0.1335
			981	0.18583	0.03034		981	0.055	0.13352
			980.5	0.18612	0.03055		980.5	0.05498	0.13348
			980	0.18623	0.03064		980	0.05507	0.13365
			979.5	0.18647	0.03082		979.5	0.05522	0.13375
			979	0.18674	0.03089		979	0.05529	0.13373
			978.5	0.18703	0.03091		978.5	0.0554	0.13385
			978	0.18725	0.03096		978	0.05544	0.13394
			977.5	0.18761	0.03108		977.5	0.05552	0.13408
			977	0.18777	0.03109		977	0.05553	0.13395
			976.5	0.18802	0.03119		976.5	0.05563	0.13402
			976	0.18837	0.03124		976	0.05569	0.13415
			975.5	0.18868	0.03144		975.5	0.05561	0.13423
			975	0.18893	0.03141		975	0.05571	0.1342
			974.5	0.18926	0.03146		974.5	0.05586	0.13432
			974	0.18957	0.0316		974	0.05588	0.13429
			973.5	0.18983	0.03165		973.5	0.05599	0.13442
			973	0.18997	0.03166		973	0.05609	0.1345
			972.5	0.1903	0.03182		972.5	0.05613	0.13462
			972	0.1904	0.03191		972	0.05608	0.13473
			971.5	0.19067	0.03212		971.5	0.0562	0.13479
			971	0.19092	0.03223		971	0.05625	0.13473
			970.5	0.19116	0.03233		970.5	0.05627	0.13482
			970	0.19136	0.03242		970	0.05626	0.13468
			969.5	0.19169	0.03247		969.5	0.05639	0.13498
			969	0.19186	0.03258		969	0.05636	0.13492
			968.5	0.19221	0.03266		968.5	0.05651	0.13515
			968	0.19247	0.03272		968	0.0566	0.13515
			967.5	0.19286	0.03286		967.5	0.05652	0.13524
			967	0.19305	0.0329		967	0.05653	0.13529
			966.5	0.19336	0.03299		966.5	0.05644	0.13535
			966	0.19369	0.03307		966	0.05646	0.13532
			965.5	0.19401	0.03301		965.5	0.05643	0.13545
			965	0.19417	0.03314		965	0.0566	0.13555
			964.5	0.1944	0.0331		964.5	0.05664	0.13562
			964	0.19473	0.03325		964	0.05675	0.13558
			963.5	0.1951	0.03329		963.5	0.05674	0.13563
			963	0.19536	0.03341		963	0.05675	0.13566
			962.5	0.19569	0.03353		962.5	0.0567	0.13569
			962	0.19607	0.03368		962	0.0567	0.13581
			961.5	0.19632	0.03379		961.5	0.05677	0.13577
			961	0.19659	0.03386		961	0.0568	0.13589
			960.5	0.19689	0.0339		960.5	0.05668	0.136
			960	0.19703	0.0341		960	0.05684	0.13597
			959.5	0.19731	0.03396		959.5	0.05685	0.1362
			959	0.19752	0.03407		959	0.05683	0.13629
			958.5	0.19782	0.03412		958.5	0.05686	0.13632
			958	0.19795	0.03418		958	0.0569	0.1364
			957.5	0.19813	0.03426		957.5	0.05696	0.13643
			957	0.19843	0.03451		957	0.05707	0.13661
			956.5	0.19876	0.03444		956.5	0.05713	0.13659
			956	0.19911	0.03442		956	0.05729	0.13649
			955.5	0.1994	0.03434		955.5	0.05732	0.13648
			955	0.19969	0.03434		955	0.05738	0.13663
			954.5	0.20007	0.03446		954.5	0.05733	0.13668
			954	0.20032	0.03452		954	0.05747	0.13679
			953.5	0.20056	0.0347		953.5	0.05744	0.13672
			953	0.20092	0.03473		953	0.05771	0.13686
			952.5	0.20111	0.03483		952.5	0.05766	0.13675
			952	0.20137	0.0349		952	0.05776	0.13684
			951.5	0.20145	0.03482		951.5	0.05785	0.13699
			951	0.20182	0.03506		951	0.05794	0.13705
			950.5	0.20201	0.03511		950.5	0.058	0.13704
			950	0.20238	0.03517		950	0.05813	0.13697
			949.5	0.20264	0.03533		949.5	0.0583	0.13705
			949	0.203	0.03534		949	0.05831	0.13698
			948.5	0.2032	0.0355		948.5	0.05837	0.13714
			948	0.2035	0.0356		948	0.05846	0.13711
			947.5	0.20373	0.03554		947.5	0.05851	0.13724
			947	0.204	0.03568		947	0.05861	0.13718
			946.5	0.20425	0.03566		946.5	0.05879	0.1372
			946	0.20454	0.03564		946	0.05883	0.13702
			945.5	0.20479	0.03571		945.5	0.05884	0.137
			945	0.20516	0.03586		945	0.05901	0.13716
			944.5	0.20538	0.03605		944.5	0.05903	0.13716
			944	0.20589	0.03606		944	0.05902	0.13719
			943.5	0.20623	0.03619		943.5	0.05914	0.13711
			943	0.20657	0.03639		943	0.05929	0.13722
			942.5	0.20683	0.0365		942.5	0.05925	0.1372
			942	0.20722	0.03664		942	0.05934	0.13709
			941.5	0.20774	0.03665		941.5	0.05925	0.13721
			941	0.20807	0.03668		941	0.05919	0.13723
			940.5	0.2083	0.03677		940.5	0.05914	0.13722
			940	0.20864	0.03684		940	0.0592	0.13727
			939.5	0.20887	0.0369		939.5	0.05924	0.13744
			939	0.20925	0.037		939	0.05937	0.13737
			938.5	0.20954	0.0369		938.5	0.0594	0.1375
			938	0.20995	0.03698		938	0.05938	0.13756
			937.5	0.21009	0.0371		937.5	0.05961	0.13747
			937	0.21053	0.037		937	0.05962	0.13748
			936.5	0.21092	0.03691		936.5	0.05963	0.13767
			936	0.21128	0.03715		936	0.05969	0.13765
			935.5	0.21174	0.03719		935.5	0.05978	0.13767
			935	0.21198	0.03735		935	0.05982	0.1376
			934.5	0.2123	0.03738		934.5	0.05993	0.13769
			934	0.21241	0.03759		934	0.05997	0.13791
			933.5	0.21284	0.03776		933.5	0.05999	0.13788
			933	0.21319	0.0379		933	0.05994	0.13804
			932.5	0.21359	0.03795		932.5	0.05996	0.13806
			932	0.21389	0.03794		932	0.05989	0.13826
			931.5	0.21426	0.03813		931.5	0.05998	0.13806
			931	0.21458	0.0382		931	0.06008	0.13842
			930.5	0.21491	0.03821		930.5	0.06013	0.13842
			930	0.21513	0.03837		930	0.06021	0.13852
			929.5	0.21545	0.03834		929.5	0.06031	0.13881
			929	0.21568	0.03846		929	0.06045	0.13877
			928.5	0.21601	0.03844		928.5	0.06051	0.13885
			928	0.21619	0.03842		928	0.06066	0.13897
			927.5	0.21648	0.03842		927.5	0.06075	0.13898
			927	0.21668	0.03842		927	0.06075	0.13887
			926.5	0.21715	0.03857		926.5	0.06075	0.13909
			926	0.2175	0.03862		926	0.06075	0.13909
			925.5	0.21773	0.03872		925.5	0.06089	0.13891
			925	0.21791	0.03862		925	0.06102	0.1389
			924.5	0.21819	0.0387		924.5	0.06106	0.13917
			924	0.21832	0.039		924	0.06114	0.13936
			923.5	0.21876	0.03908		923.5	0.06115	0.13925
			923	0.21887	0.03907		923	0.06101	0.13932
			922.5	0.21917	0.03926		922.5	0.06119	0.13932
			922	0.21944	0.0394		922	0.06123	0.13953
			921.5	0.21998	0.03927		921.5	0.06109	0.13957
			921	0.22004	0.03958		921	0.06102	0.13981
			920.5	0.22054	0.0398		920.5	0.06116	0.13962
			920	0.22099	0.03973		920	0.06113	0.13951
			919.5	0.22145	0.03996		919.5	0.06118	0.13957
			919	0.22176	0.03978		919	0.06131	0.13961
			918.5	0.22226	0.03993		918.5	0.06137	0.13965
			918	0.22244	0.03997		918	0.06139	0.13944
			917.5	0.22254	0.03984		917.5	0.06142	0.13966
			917	0.22274	0.03997		917	0.06163	0.13949
			916.5	0.22316	0.03992		916.5	0.06158	0.13953
			916	0.22331	0.04029		916	0.06174	0.13955
			915.5	0.22355	0.04014		915.5	0.06177	0.13989
			915	0.22385	0.04023		915	0.06186	0.13983
			914.5	0.22419	0.04036		914.5	0.0618	0.14012
			914	0.22458	0.04051		914	0.06197	0.14003
			913.5	0.22507	0.04042		913.5	0.06199	0.13982
			913	0.22535	0.04057		913	0.06203	0.13981
			912.5	0.22603	0.04079		912.5	0.06214	0.13972
			912	0.22618	0.04118		912	0.0624	0.13981
			911.5	0.22648	0.04141		911.5	0.06236	0.14005
			911	0.22681	0.04153		911	0.06244	0.14003
			910.5	0.22732	0.04145		910.5	0.06252	0.13977
			910	0.22756	0.04151		910	0.0627	0.13996
			909.5	0.22815	0.0415		909.5	0.0627	0.14005
			909	0.22846	0.0416		909	0.06282	0.14021
			908.5	0.22901	0.04169		908.5	0.06308	0.14006
			908	0.22934	0.04175		908	0.06315	0.14012
			907.5	0.22954	0.04165		907.5	0.06309	0.14033
			907	0.22996	0.04182		907	0.06317	0.14054
			906.5	0.23036	0.04188		906.5	0.06314	0.14062
			906	0.2307	0.04201		906	0.06326	0.14042
			905.5	0.23115	0.04221		905.5	0.0634	0.14068
			905	0.23167	0.04244		905	0.06354	0.14027
			904.5	0.23195	0.04245		904.5	0.06352	0.14045
			904	0.23228	0.04282		904	0.06353	0.14066
			903.5	0.23271	0.04288		903.5	0.06356	0.14095
			903	0.23297	0.0432		903	0.06367	0.14096
			902.5	0.23331	0.04314		902.5	0.0636	0.14141
			902	0.23388	0.04339		902	0.06378	0.14169
			901.5	0.23426	0.04357		901.5	0.06362	0.14169
			901	0.23487	0.04355		901	0.06358	0.14195
			900.5	0.23514	0.04374		900.5	0.06363	0.14209
			900	0.23574	0.04372		900	0.0638	0.14163
			899.5	0.23581	0.04391		899.5	0.06383	0.14183
			899	0.23645	0.04389		899	0.06401	0.1417
			898.5	0.23672	0.04409		898.5	0.06385	0.14182
			898	0.23695	0.0441		898	0.06378	0.14191
			897.5	0.23708	0.04445		897.5	0.0634	0.14265
			897	0.23769	0.04458		897	0.06341	0.14268
			896.5	0.2376	0.04439		896.5	0.06349	0.1431
			896	0.23801	0.04445		896	0.0633	0.14295
			895.5	0.23832	0.04469		895.5	0.06342	0.14262
			895	0.23871	0.04488		895	0.0636	0.14301
			894.5	0.23888	0.04507		894.5	0.06348	0.14331
			894	0.23933	0.04565		894	0.06373	0.14339
			893.5	0.23937	0.04578		893.5	0.06391	0.14368
			893	0.23987	0.04596		893	0.0638	0.14347
			892.5	0.24018	0.04601		892.5	0.06371	0.14373
			892	0.24104	0.04611		892	0.06392	0.14364
			891.5	0.24127	0.04666		891.5	0.06396	0.14368
			891	0.24186	0.04677		891	0.06443	0.1436
			890.5	0.24208	0.04675		890.5	0.06428	0.14374
			890	0.24241	0.04691		890	0.06437	0.14407
			889.5	0.24273	0.04705		889.5	0.06424	0.14444
			889	0.24307	0.04715		889	0.06439	0.14468
			888.5	0.24324	0.04724		888.5	0.06469	0.14473
			888	0.24366	0.04725		888	0.06483	0.14485
			887.5	0.244	0.04745		887.5	0.06494	0.14458
			887	0.24428	0.04757		887	0.06493	0.14516
			886.5	0.24464	0.04757		886.5	0.06471	0.14462
			886	0.24493	0.04733		886	0.0646	0.14461
			885.5	0.24545	0.04738		885.5	0.06486	0.14484
			885	0.2456	0.04754		885	0.0649	0.1447
			884.5	0.24581	0.04771		884.5	0.06516	0.1449
			884	0.246	0.04783		884	0.06529	0.14525
			883.5	0.24695	0.04771		883.5	0.0652	0.14506
			883	0.24661	0.04797		883	0.06495	0.14481
			882.5	0.2473	0.048		882.5	0.06526	0.14462
			882	0.24772	0.04839		882	0.06544	0.14464
			881.5	0.24821	0.04852		881.5	0.06575	0.14415
			881	0.24861	0.04863		881	0.06593	0.14413
			880.5	0.24913	0.04893		880.5	0.06583	0.14383
			880	0.24993	0.04903		880	0.06589	0.14382
			879.5	0.2504	0.04896		879.5	0.06584	0.14454
			879	0.251	0.04905		879	0.06583	0.14447
			878.5	0.25105	0.0491		878.5	0.06612	0.14417
			878	0.25121	0.04878		878	0.06599	0.14411
			877.5	0.25186	0.04879		877.5	0.06603	0.14402
			877	0.25269	0.04907		877	0.06611	0.14407
			876.5	0.25313	0.04966		876.5	0.06605	0.14409
			876	0.25297	0.04953		876	0.0658	0.14449
			875.5	0.25392	0.04921		875.5	0.06623	0.14433
			875	0.2539	0.04964		875	0.06605	0.14429
			874.5	0.25462	0.04957		874.5	0.06631	0.14403
			874	0.25493	0.04959		874	0.06611	0.14377
			873.5	0.25529	0.04934		873.5	0.0664	0.14325
			873	0.25555	0.04935		873	0.0661	0.14338
			872.5	0.25594	0.04956		872.5	0.0662	0.14343
			872	0.25636	0.0493		872	0.06618	0.14344
			871.5	0.25683	0.04905		871.5	0.06606	0.14352
			871	0.25747	0.04907		871	0.06593	0.14307
			870.5	0.25744	0.04958		870.5	0.06625	0.1434
			870	0.25814	0.05022		870	0.06661	0.1437
			869.5	0.25834	0.05056		869.5	0.06658	0.14392
			869	0.25868	0.05091		869	0.06638	0.14396
			868.5	0.25939	0.05117		868.5	0.0666	0.14397
			868	0.26018	0.05114		868	0.06638	0.14422
			867.5	0.26052	0.05116		867.5	0.06646	0.14463
			867	0.26133	0.05149		867	0.06631	0.1448
			866.5	0.26146	0.05184		866.5	0.06665	0.14542
			866	0.26188	0.05167		866	0.06663	0.14576
			865.5	0.26256	0.05193		865.5	0.06659	0.14563
			865	0.26267	0.05171		865	0.06649	0.14573
			864.5	0.26367	0.05183		864.5	0.06671	0.14586
			864	0.26337	0.0517		864	0.06668	0.14658
			863.5	0.26381	0.05206		863.5	0.06712	0.14616
			863	0.26385	0.05233		863	0.06678	0.14599
			862.5	0.26498	0.05255		862.5	0.06694	0.14652
			862	0.26557	0.05264		862	0.06706	0.1472
			861.5	0.26597	0.05289		861.5	0.06717	0.14763
			861	0.26591	0.05296		861	0.06737	0.1478
			860.5	0.26633	0.05255		860.5	0.06713	0.14823
			860	0.26672	0.053		860	0.06739	0.14802
			859.5	0.26706	0.0532		859.5	0.06738	0.14849
			859	0.26806	0.05312		859	0.06738	0.14823
			858.5	0.2683	0.05393		858.5	0.06766	0.14827
			858	0.26889	0.05435		858	0.06788	0.14844
			857.5	0.26963	0.05442		857.5	0.06811	0.14882
			857	0.27035	0.05479		857	0.06836	0.14912
			856.5	0.27103	0.05502		856.5	0.06782	0.14969
			856	0.27105	0.05535		856	0.06842	0.14935
			855.5	0.2715	0.05534		855.5	0.0685	0.14933
			855	0.27194	0.05576		855	0.0688	0.14975
			854.5	0.27291	0.05564		854.5	0.06893	0.14929
			854	0.27302	0.0557		854	0.0687	0.14926
			853.5	0.27373	0.05598		853.5	0.06904	0.14866
			853	0.27456	0.05587		853	0.06997	0.14897
			852.5	0.27483	0.05566		852.5	0.06985	0.14882
			852	0.27466	0.05609		852	0.07011	0.14911
			851.5	0.27457	0.05661		851.5	0.07014	0.14893
			851	0.27534	0.05681		851	0.07068	0.14941
			850.5	0.27573	0.05652		850.5	0.07037	0.14863
			850	0.27514	0.05657		850	0.0705	0.14738
			849.5	0.27567	0.0568		849.5	0.07057	0.14746
			849	0.27606	0.05694		849	0.0706	0.14745
			848.5	0.27655	0.05702		848.5	0.07077	0.14746
			848	0.27698	0.05707		848	0.07084	0.14759
			847.5	0.27758	0.05718		847.5	0.07086	0.14768
			847	0.27807	0.05736		847	0.07095	0.14767
			846.5	0.2785	0.05744		846.5	0.07112	0.14776
			846	0.279	0.05753		846	0.07121	0.14778
			845.5	0.2795	0.05762		845.5	0.07113	0.14778
			845	0.27998	0.05779		845	0.07125	0.14786
			844.5	0.28046	0.05797		844.5	0.07127	0.14796
			844	0.28104	0.05815		844	0.07134	0.14798
			843.5	0.28155	0.05824		843.5	0.07136	0.14798
			843	0.28208	0.05847		843	0.07151	0.14802
			842.5	0.28254	0.0586		842.5	0.0716	0.14803
			842	0.283	0.05864		842	0.07164	0.14806
			841.5	0.28345	0.05871		841.5	0.07168	0.1481
			841	0.28398	0.05879		841	0.07175	0.14815
			840.5	0.28448	0.05891		840.5	0.07174	0.14813
			840	0.28503	0.0591		840	0.07187	0.14813
			839.5	0.28548	0.05924		839.5	0.07195	0.14823
			839	0.28607	0.05939		839	0.07201	0.14823
			838.5	0.28666	0.05952		838.5	0.07212	0.14835
			838	0.28717	0.05971		838	0.07226	0.14843
			837.5	0.28772	0.05989		837.5	0.07228	0.14857
			837	0.2882	0.06001		837	0.07231	0.14869
			836.5	0.28872	0.06017		836.5	0.07233	0.14874
			836	0.2893	0.06031		836	0.07237	0.14879
			835.5	0.28984	0.06047		835.5	0.07252	0.14877
			835	0.29046	0.06063		835	0.07257	0.14876
			834.5	0.29097	0.06076		834.5	0.07258	0.14882
			834	0.29147	0.06094		834	0.07263	0.14887
			833.5	0.29202	0.06106		833.5	0.07271	0.14896
			833	0.29255	0.06126		833	0.0728	0.14901
			832.5	0.29307	0.06148		832.5	0.07281	0.14906
			832	0.29364	0.06164		832	0.07293	0.14904
			831.5	0.29408	0.0618		831.5	0.07295	0.14911
			831	0.29465	0.06192		831	0.07298	0.1492
			830.5	0.29522	0.06207		830.5	0.07296	0.14926
			830	0.29578	0.06219		830	0.07312	0.14933
			829.5	0.29637	0.06242		829.5	0.07324	0.14946
			829	0.29697	0.06247		829	0.07323	0.14952
			828.5	0.29754	0.06261		828.5	0.07329	0.14952
			828	0.2981	0.06272		828	0.07336	0.14965
			827.5	0.29864	0.06282		827.5	0.0734	0.1497
			827	0.29916	0.06293		827	0.07342	0.14974
			826.5	0.29976	0.06306		826.5	0.07351	0.14982
			826	0.30037	0.06327		826	0.07357	0.1499
			825.5	0.30096	0.06345		825.5	0.07367	0.15006
			825	0.30152	0.06361		825	0.07371	0.15007
			824.5	0.3021	0.06372		824.5	0.0738	0.15015
			824	0.30266	0.06386		824	0.0739	0.15027
			823.5	0.3033	0.06395		823.5	0.07386	0.15034
			823	0.30386	0.06411		823	0.07393	0.15041
			822.5	0.30445	0.06431		822.5	0.07399	0.15046
			822	0.30501	0.06445		822	0.07402	0.15053
			821.5	0.30547	0.06456		821.5	0.07405	0.1505
			821	0.30606	0.06476		821	0.07417	0.15052
			820.5	0.30661	0.06486		820.5	0.07429	0.15058
			820	0.30714	0.06496		820	0.07439	0.15068
			819.5	0.30763	0.06515		819.5	0.07438	0.15083
			819	0.30825	0.06533		819	0.07447	0.1509
			818.5	0.30882	0.06543		818.5	0.07455	0.15092
			818	0.30941	0.06558		818	0.07464	0.15105
			817.5	0.31	0.06569		817.5	0.07472	0.15111
			817	0.31052	0.06583		817	0.07476	0.15122
			816.5	0.31106	0.06601		816.5	0.07478	0.15126
			816	0.31167	0.06615		816	0.07477	0.15137
			815.5	0.31226	0.06631		815.5	0.07486	0.1514
			815	0.31284	0.06649		815	0.07494	0.15143
			814.5	0.31344	0.06669		814.5	0.07508	0.15141
			814	0.314	0.06685		814	0.07508	0.15147
			813.5	0.31455	0.06693		813.5	0.07517	0.1515
			813	0.3151	0.06717		813	0.07528	0.15151
			812.5	0.3157	0.0673		812.5	0.07533	0.15159
			812	0.31626	0.06753		812	0.07543	0.15163
			811.5	0.31687	0.06775		811.5	0.07554	0.15167
			811	0.31745	0.06785		811	0.07563	0.1518
			810.5	0.31808	0.06806		810.5	0.07569	0.15182
			810	0.31867	0.06821		810	0.07577	0.1519
			809.5	0.31934	0.06839		809.5	0.07582	0.15188
			809	0.31986	0.06853		809	0.07591	0.15198
			808.5	0.32047	0.06874		808.5	0.07595	0.15203
			808	0.32103	0.06892		808	0.07602	0.15213
			807.5	0.32161	0.06921		807.5	0.07613	0.15217
			807	0.32223	0.0694		807	0.07622	0.1522
			806.5	0.32283	0.06953		806.5	0.07628	0.1522
			806	0.32347	0.06967		806	0.07639	0.15226
			805.5	0.32412	0.06984		805.5	0.07647	0.15235
			805	0.32473	0.06997		805	0.07656	0.15246
			804.5	0.32534	0.07018		804.5	0.07665	0.15253
			804	0.32596	0.07041		804	0.07668	0.15253
			803.5	0.3266	0.07055		803.5	0.07677	0.15258
			803	0.32716	0.07066		803	0.07681	0.15267
			802.5	0.32778	0.07089		802.5	0.07691	0.15274
			802	0.32841	0.07105		802	0.07696	0.15278
			801.5	0.32904	0.07122		801.5	0.07704	0.1528
			801	0.32968	0.07135		801	0.07715	0.15291
			800.5	0.33034	0.07146		800.5	0.07726	0.15297
			800	0.33095	0.07172		800	0.07736	0.153
			799.5	0.33157	0.07185		799.5	0.07746	0.15301
			799	0.3322	0.07204		799	0.07754	0.15308
			798.5	0.33278	0.07218		798.5	0.07758	0.15321
			798	0.33342	0.07234		798	0.07761	0.15331
			797.5	0.334	0.0726		797.5	0.07763	0.15348
			797	0.33463	0.07276		797	0.07769	0.15354
			796.5	0.33521	0.07292		796.5	0.07779	0.15368
			796	0.33579	0.07303		796	0.07786	0.15372
			795.5	0.33644	0.07319		795.5	0.07794	0.15378
			795	0.33707	0.07342		795	0.07807	0.15377
			794.5	0.33766	0.07358		794.5	0.07815	0.15385
			794	0.33824	0.0737		794	0.07822	0.15395
			793.5	0.33877	0.07383		793.5	0.0783	0.15402
			793	0.33948	0.07406		793	0.07839	0.15403
			792.5	0.34006	0.07425		792.5	0.07849	0.15408
			792	0.34073	0.0744		792	0.07856	0.15415
			791.5	0.34135	0.07453		791.5	0.07867	0.15426
			791	0.34197	0.07465		791	0.07875	0.15433
			790.5	0.34263	0.07484		790.5	0.07884	0.15448
			790	0.34323	0.07498		790	0.07889	0.15455
			789.5	0.34391	0.07521		789.5	0.07899	0.15466
			789	0.34456	0.07539		789	0.07904	0.15473
			788.5	0.34526	0.07562		788.5	0.07907	0.1548
			788	0.34587	0.07579		788	0.07915	0.15485
			787.5	0.34652	0.07602		787.5	0.07926	0.15494
			787	0.34718	0.07623		787	0.07938	0.15499
			786.5	0.34784	0.07642		786.5	0.07941	0.15506
			786	0.34843	0.07666		786	0.07953	0.15508
			785.5	0.34903	0.07688		785.5	0.07959	0.1551
			785	0.34972	0.07712		785	0.07965	0.15512
			784.5	0.35036	0.07735		784.5	0.07973	0.15518
			784	0.35099	0.0775		784	0.07981	0.15526
			783.5	0.35166	0.07776		783.5	0.07987	0.15541
			783	0.3523	0.07796		783	0.07996	0.15548
			782.5	0.35295	0.07817		782.5	0.08004	0.15548
			782	0.3536	0.0784		782	0.08016	0.15556
			781.5	0.35427	0.0786		781.5	0.08022	0.15554
			781	0.35494	0.07877		781	0.08031	0.15565
			780.5	0.3556	0.07897		780.5	0.08038	0.1557
			780	0.3563	0.0792		780	0.08047	0.1558
			779.5	0.35688	0.07942		779.5	0.08053	0.15591
			779	0.35751	0.07964		779	0.08054	0.15602
			778.5	0.35819	0.07984		778.5	0.08059	0.15612
			778	0.35891	0.0801		778	0.0807	0.15616
			777.5	0.35962	0.08033		777.5	0.08075	0.15621
			777	0.3603	0.08055		777	0.08083	0.15629
			776.5	0.36103	0.08073		776.5	0.08091	0.1564
			776	0.3617	0.08096		776	0.08099	0.15647
			775.5	0.36234	0.08113		775.5	0.08106	0.15656
			775	0.36297	0.08137		775	0.08111	0.15668
			774.5	0.3636	0.0816		774.5	0.08119	0.15675
			774	0.36424	0.08182		774	0.08128	0.15684
			773.5	0.36493	0.082		773.5	0.08135	0.15687
			773	0.36555	0.08223		773	0.08146	0.15687
			772.5	0.36616	0.08246		772.5	0.08157	0.15693
			772	0.36687	0.08268		772	0.08168	0.15701
			771.5	0.36757	0.08289		771.5	0.08176	0.15703
			771	0.36822	0.0831		771	0.08183	0.15713
			770.5	0.36889	0.08331		770.5	0.08197	0.15721
			770	0.36957	0.08351		770	0.08201	0.15732
			769.5	0.37021	0.08372		769.5	0.08211	0.15742
			769	0.37086	0.08389		769	0.08223	0.15748
			768.5	0.37148	0.0841		768.5	0.08229	0.15759
			768	0.37211	0.08432		768	0.08239	0.15766
			767.5	0.37277	0.0845		767.5	0.08247	0.15771
			767	0.37343	0.08466		767	0.08259	0.15778
			766.5	0.37411	0.08489		766.5	0.08267	0.15793
			766	0.3748	0.08506		766	0.08277	0.15802
			765.5	0.37548	0.08524		765.5	0.08288	0.15808
			765	0.37612	0.0855		765	0.08298	0.15817
			764.5	0.3768	0.08575		764.5	0.08307	0.15819
			764	0.37739	0.08595		764	0.08313	0.15828
			763.5	0.37807	0.08621		763.5	0.08324	0.15831
			763	0.37875	0.08643		763	0.08335	0.15836
			762.5	0.37938	0.08661		762.5	0.08346	0.15847
			762	0.38002	0.08685		762	0.08354	0.15857
			761.5	0.3807	0.08708		761.5	0.08363	0.15864
			761	0.38134	0.0873		761	0.0837	0.15875
			760.5	0.38199	0.08754		760.5	0.08378	0.15878
			760	0.38264	0.08778		760	0.08386	0.15883
			759.5	0.3833	0.08805		759.5	0.08393	0.15887
			759	0.38399	0.08829		759	0.08402	0.1589
			758.5	0.38461	0.0885		758.5	0.08412	0.15893
			758	0.3853	0.08874		758	0.08417	0.15899
			757.5	0.38595	0.08899		757.5	0.08425	0.15905
			757	0.38661	0.08919		757	0.08428	0.15917
			756.5	0.38731	0.08937		756.5	0.08436	0.15922
			756	0.38788	0.08961		756	0.08445	0.15931
			755.5	0.38851	0.08982		755.5	0.08451	0.15943
			755	0.38917	0.09009		755	0.08459	0.15954
			754.5	0.38979	0.09032		754.5	0.08466	0.15964
			754	0.39045	0.09055		754	0.08476	0.15965
			753.5	0.39109	0.09078		753.5	0.08482	0.15975
			753	0.39173	0.09101		753	0.08488	0.15987
			752.5	0.39243	0.09124		752.5	0.08499	0.15993
			752	0.39309	0.0915		752	0.08506	0.16001
			751.5	0.39374	0.09178		751.5	0.08517	0.16008
			751	0.39442	0.09205		751	0.08521	0.16019
			750.5	0.395	0.09223		750.5	0.08532	0.16023
			750	0.39558	0.09248		750	0.0854	0.16026
			749.5	0.39619	0.09274		749.5	0.0855	0.16038
			749	0.39684	0.09297		749	0.08559	0.16042
			748.5	0.39746	0.09322		748.5	0.0857	0.16056
			748	0.39814	0.09348		748	0.0858	0.16064
			747.5	0.39875	0.09375		747.5	0.08584	0.16077
			747	0.39937	0.09399		747	0.08592	0.16091
			746.5	0.39997	0.09428		746.5	0.086	0.16095
			746	0.40062	0.09453		746	0.08608	0.161
			745.5	0.40123	0.09475		745.5	0.08621	0.16112
			745	0.40186	0.095		745	0.08632	0.16118
			744.5	0.40242	0.09525		744.5	0.08641	0.1613
			744	0.40303	0.09548		744	0.0865	0.16136
			743.5	0.4037	0.09569		743.5	0.08661	0.16147
			743	0.40433	0.09593		743	0.08672	0.16157
			742.5	0.40495	0.09618		742.5	0.0868	0.16168
			742	0.40558	0.09646		742	0.08687	0.16173
			741.5	0.40619	0.09671		741.5	0.08699	0.16185
			741	0.40683	0.09696		741	0.08712	0.16194
			740.5	0.40743	0.09721		740.5	0.08723	0.16204
			740	0.40797	0.09747		740	0.08704	0.16156
			739.5	0.40859	0.09777		739.5	0.08716	0.16163
			739	0.40919	0.098		739	0.08724	0.16171
			738.5	0.40983	0.09831		738.5	0.08734	0.16183
			738	0.41046	0.09858		738	0.08748	0.16196
			737.5	0.41107	0.0989		737.5	0.08759	0.16199
			737	0.41165	0.09916		737	0.0877	0.16206
			736.5	0.41231	0.09942		736.5	0.08781	0.16217
			736	0.41295	0.09963		736	0.08789	0.1622
			735.5	0.4136	0.09986		735.5	0.08799	0.16228
			735	0.41419	0.10014		735	0.08806	0.16238
			734.5	0.41487	0.10039		734.5	0.08817	0.16247
			734	0.41546	0.1007		734	0.08829	0.16258
			733.5	0.41611	0.101		733.5	0.08839	0.1627
			733	0.4167	0.10129		733	0.08846	0.16276
			732.5	0.4173	0.10159		732.5	0.08858	0.16284
			732	0.41789	0.1019		732	0.08868	0.16294
			731.5	0.41852	0.10216		731.5	0.08876	0.16298
			731	0.41909	0.10242		731	0.08885	0.16309
			730.5	0.41972	0.10269		730.5	0.08895	0.16312
			730	0.42032	0.10302		730	0.08908	0.16319
			729.5	0.42095	0.1033		729.5	0.08916	0.1633
			729	0.42156	0.10363		729	0.08928	0.16338
			728.5	0.42216	0.10391		728.5	0.08937	0.16344
			728	0.42272	0.10417		728	0.08947	0.16353
			727.5	0.42335	0.10452		727.5	0.08957	0.16363
			727	0.42389	0.10485		727	0.08966	0.16372
			726.5	0.42449	0.10516		726.5	0.08975	0.16382
			726	0.42503	0.10545		726	0.08985	0.16391
			725.5	0.42563	0.10575		725.5	0.08993	0.16398
			725	0.42618	0.10604		725	0.09003	0.16407
			724.5	0.4268	0.10628		724.5	0.09014	0.16417
			724	0.42734	0.10656		724	0.09026	0.16426
			723.5	0.42793	0.10687		723.5	0.09033	0.16434
			723	0.42848	0.10719		723	0.09043	0.16441
			722.5	0.42906	0.10745		722.5	0.09052	0.16449
			722	0.42964	0.10776		722	0.09061	0.16455
			721.5	0.43021	0.10805		721.5	0.09069	0.16466
			721	0.43074	0.10838		721	0.09078	0.16475
			720.5	0.43132	0.10866		720.5	0.0909	0.16479
			720	0.43187	0.10896		720	0.09102	0.1649
			719.5	0.43242	0.10928		719.5	0.09113	0.165
			719	0.433	0.10958		719	0.09126	0.16501
			718.5	0.43352	0.1099		718.5	0.09133	0.16509
			718	0.43405	0.1102		718	0.09142	0.16518
			717.5	0.43457	0.11048		717.5	0.09151	0.16529
			717	0.43512	0.11079		717	0.09164	0.16539
			716.5	0.43568	0.11108		716.5	0.09175	0.16546
			716	0.4362	0.11137		716	0.09182	0.16553
			715.5	0.43671	0.11168		715.5	0.09194	0.16563
			715	0.43726	0.11199		715	0.09207	0.16571
			714.5	0.43779	0.1123		714.5	0.09216	0.16584
			714	0.4383	0.11259		714	0.09223	0.16596
			713.5	0.4388	0.11292		713.5	0.09235	0.16607
			713	0.43929	0.1132		713	0.09246	0.16618
			712.5	0.4398	0.11351		712.5	0.09257	0.16631
			712	0.44033	0.11384		712	0.09265	0.16638
			711.5	0.44079	0.11414		711.5	0.09273	0.16647
			711	0.44128	0.11447		711	0.09282	0.16657
			710.5	0.44175	0.11477		710.5	0.09292	0.16669
			710	0.44226	0.11511		710	0.09304	0.1668
			709.5	0.44276	0.11542		709.5	0.09316	0.16688
			709	0.44328	0.11576		709	0.09327	0.167
			708.5	0.44373	0.11608		708.5	0.09337	0.16706
			708	0.44426	0.11642		708	0.09349	0.16714
			707.5	0.44475	0.11675		707.5	0.09359	0.16723
			707	0.4453	0.11708		707	0.09368	0.16728
			706.5	0.44577	0.11745		706.5	0.09379	0.16739
			706	0.44626	0.11776		706	0.09387	0.16748
			705.5	0.44673	0.1181		705.5	0.094	0.16755
			705	0.44724	0.11841		705	0.09414	0.16764
			704.5	0.44769	0.11878		704.5	0.09424	0.16774
			704	0.44815	0.11912		704	0.09436	0.16781
			703.5	0.44859	0.11948		703.5	0.09446	0.1679
			703	0.44907	0.11982		703	0.09456	0.16802
			702.5	0.44952	0.12017		702.5	0.0947	0.16811
			702	0.45	0.12053		702	0.09483	0.16819
			701.5	0.45047	0.12087		701.5	0.09494	0.16828
			701	0.45093	0.12121		701	0.09502	0.16837
			700.5	0.45135	0.12158		700.5	0.09515	0.16849
			700	0.45183	0.12192		700	0.0953	0.16858
			699.5	0.45228	0.12226		699.5	0.0954	0.16868
			699	0.45273	0.12263		699	0.0955	0.16877
			698.5	0.45318	0.12296		698.5	0.09561	0.16885
			698	0.45365	0.12331		698	0.09572	0.16891
			697.5	0.45412	0.12367		697.5	0.09583	0.16897
			697	0.4546	0.124		697	0.09592	0.16903
			696.5	0.45506	0.12437		696.5	0.09603	0.1691
			696	0.45553	0.12472		696	0.09617	0.16917
			695.5	0.45601	0.12505		695.5	0.0963	0.16927
			695	0.45648	0.12538		695	0.09643	0.16934
			694.5	0.45696	0.12574		694.5	0.09654	0.16943
			694	0.45742	0.12609		694	0.09664	0.16947
			693.5	0.45786	0.12643		693.5	0.09673	0.16955
			693	0.4583	0.12675		693	0.09685	0.16962
			692.5	0.45875	0.12711		692.5	0.09695	0.16972
			692	0.45919	0.12744		692	0.09704	0.1698
			691.5	0.45965	0.12779		691.5	0.09716	0.1699
			691	0.46007	0.12814		691	0.09727	0.17
			690.5	0.4605	0.1285		690.5	0.09739	0.17009
			690	0.46095	0.12884		690	0.09752	0.17015
			689.5	0.46141	0.12919		689.5	0.09762	0.17028
			689	0.46186	0.12957		689	0.09771	0.17035
			688.5	0.46232	0.12996		688.5	0.09782	0.17043
			688	0.46277	0.13035		688	0.09791	0.17051
			687.5	0.46324	0.13071		687.5	0.09805	0.17059
			687	0.46368	0.13105		687	0.09816	0.17067
			686.5	0.46415	0.13141		686.5	0.09826	0.17077
			686	0.46458	0.13182		686	0.09834	0.17085
			685.5	0.46503	0.1323		685.5	0.09845	0.17095
			685	0.46546	0.13273		685	0.09858	0.17104
			684.5	0.46588	0.13322		684.5	0.09867	0.17114
			684	0.46631	0.13368		684	0.09879	0.17122
			683.5	0.46672	0.13415		683.5	0.09893	0.17131
			683	0.46713	0.13458		683	0.09904	0.1714
			682.5	0.46752	0.13503		682.5	0.09917	0.17146
			682	0.4679	0.13546		682	0.09928	0.17156
			681.5	0.46824	0.13591		681.5	0.0994	0.17165
			681	0.46856	0.13635		681	0.09951	0.17174
			680.5	0.46887	0.1368		680.5	0.0996	0.17184
			680	0.46915	0.13725		680	0.09969	0.17189
			679.5	0.46945	0.13769		679.5	0.09979	0.17196
			679	0.46968	0.13809		679	0.09988	0.17204
			678.5	0.46998	0.1385		678.5	0.09996	0.17212
			678	0.47022	0.13892		678	0.10006	0.17224
			677.5	0.47047	0.13935		677.5	0.10016	0.1723
			677	0.47073	0.13978		677	0.10027	0.17238
			676.5	0.47095	0.1402		676.5	0.10038	0.17247
			676	0.47115	0.14062		676	0.10049	0.17255
			675.5	0.47137	0.14103		675.5	0.1006	0.17262
			675	0.47156	0.14147		675	0.10069	0.17271
			674.5	0.47179	0.14189		674.5	0.10079	0.1728
			674	0.472	0.14232		674	0.10086	0.17294
			673.5	0.47223	0.14275		673.5	0.10096	0.17302
			673	0.47242	0.14319		673	0.10104	0.17313
			672.5	0.47262	0.14362		672.5	0.10113	0.17325
			672	0.47282	0.14405		672	0.10122	0.17335
			671.5	0.47301	0.14448		671.5	0.10131	0.17346
			671	0.47319	0.14498		671	0.10142	0.17357
			670.5	0.47338	0.14544		670.5	0.10151	0.17368
			670	0.4736	0.14589		670	0.10163	0.17378
			669.5	0.47381	0.14632		669.5	0.10176	0.17385
			669	0.47402	0.14679		669	0.10189	0.17393
			668.5	0.47426	0.1472		668.5	0.102	0.174
			668	0.47448	0.14765		668	0.10211	0.17409
			667.5	0.47471	0.14811		667.5	0.10223	0.17418
			667	0.47491	0.14858		667	0.10237	0.17428
			666.5	0.47511	0.14903		666.5	0.10249	0.17442
			666	0.47531	0.14952		666	0.10262	0.17451
			665.5	0.47552	0.14996		665.5	0.10273	0.17464
			665	0.47571	0.15045		665	0.10286	0.17471
			664.5	0.47589	0.15091		664.5	0.10299	0.17482
			664	0.47608	0.15137		664	0.10311	0.17495
			663.5	0.47624	0.15183		663.5	0.10325	0.17507
			663	0.47644	0.15233		663	0.10339	0.17519
			662.5	0.47656	0.1528		662.5	0.10353	0.17532
			662	0.47673	0.15328		662	0.10365	0.17542
			661.5	0.47689	0.15371		661.5	0.10379	0.17555
			661	0.47704	0.15421		661	0.10392	0.17566
			660.5	0.4772	0.15465		660.5	0.10405	0.17576
			660	0.47738	0.15516		660	0.10415	0.17587
			659.5	0.4775	0.15565		659.5	0.10427	0.17599
			659	0.47765	0.15614		659	0.1044	0.17608
			658.5	0.47777	0.1566		658.5	0.10451	0.17617
			658	0.47788	0.1571		658	0.10468	0.17622
			657.5	0.47798	0.15757		657.5	0.10481	0.17628
			657	0.47811	0.15805		657	0.10494	0.17635
			656.5	0.47824	0.15852		656.5	0.10505	0.17642
			656	0.47834	0.15903		656	0.1052	0.17653
			655.5	0.47844	0.15955		655.5	0.10533	0.17663
			655	0.47855	0.16002		655	0.10547	0.17671
			654.5	0.47864	0.16051		654.5	0.10564	0.17679
			654	0.47873	0.161		654	0.10576	0.1769
			653.5	0.47882	0.1615		653.5	0.10589	0.17701
			653	0.47892	0.16199		653	0.106	0.17712
			652.5	0.47899	0.16249		652.5	0.10613	0.17724
			652	0.47909	0.16299		652	0.10625	0.17736
			651.5	0.47914	0.1635		651.5	0.10637	0.17745
			651	0.47921	0.164		651	0.10646	0.17754
			650.5	0.47923	0.16453		650.5	0.10657	0.17765
			650	0.47926	0.16504		650	0.10667	0.17774
			649.5	0.4793	0.16556		649.5	0.1068	0.17781
			649	0.47933	0.16607		649	0.10692	0.17794
			648.5	0.47937	0.16656		648.5	0.10705	0.17802
			648	0.47942	0.1671		648	0.1072	0.17812
			647.5	0.47944	0.16759		647.5	0.1073	0.17821
			647	0.47947	0.16809		647	0.10743	0.17827
			646.5	0.47949	0.16862		646.5	0.10757	0.17833
			646	0.47952	0.16912		646	0.1077	0.17844
			645.5	0.47954	0.16968		645.5	0.10782	0.17855
			645	0.47954	0.17018		645	0.10794	0.17861
			644.5	0.47954	0.17073		644.5	0.10806	0.17873
			644	0.4795	0.17124		644	0.10819	0.17881
			643.5	0.47952	0.17175		643.5	0.1083	0.17888
			643	0.47951	0.17227		643	0.10843	0.179
			642.5	0.47951	0.17281		642.5	0.10855	0.17907
			642	0.47952	0.17332		642	0.10867	0.17919
			641.5	0.47951	0.17386		641.5	0.10878	0.17932
			641	0.47946	0.1744		641	0.10891	0.17941
			640.5	0.47943	0.17493		640.5	0.10906	0.17952
			640	0.4794	0.17543		640	0.10919	0.1796
			639.5	0.47937	0.17593		639.5	0.10929	0.17971
			639	0.47932	0.17649		639	0.10938	0.17982
			638.5	0.47928	0.17704		638.5	0.10949	0.17994
			638	0.47923	0.1776		638	0.10961	0.18003
			637.5	0.47917	0.17815		637.5	0.10975	0.18014
			637	0.47911	0.17868		637	0.10988	0.18024
			636.5	0.47905	0.17922		636.5	0.11001	0.18034
			636	0.47895	0.17976		636	0.11012	0.18044
			635.5	0.47888	0.18026		635.5	0.11025	0.18057
			635	0.47878	0.1808		635	0.11041	0.18068
			634.5	0.47872	0.18135		634.5	0.11052	0.18081
			634	0.47864	0.1819		634	0.11065	0.18091
			633.5	0.47854	0.18247		633.5	0.11077	0.18105
			633	0.47848	0.18303		633	0.11091	0.18114
			632.5	0.4784	0.1836		632.5	0.11103	0.18126
			632	0.47827	0.18414		632	0.11114	0.18135
			631.5	0.47816	0.18473		631.5	0.11126	0.18145
			631	0.47802	0.1853		631	0.1114	0.1816
			630.5	0.47791	0.18589		630.5	0.11152	0.1817
			630	0.47776	0.18647		630	0.11163	0.18179
			629.5	0.4776	0.18706		629.5	0.11177	0.18187
			629	0.47748	0.18763		629	0.1119	0.182
			628.5	0.47734	0.18821		628.5	0.11203	0.1821
			628	0.47722	0.18877		628	0.11214	0.1822
			627.5	0.47707	0.18935		627.5	0.11229	0.18231
			627	0.47691	0.18995		627	0.11243	0.18238
			626.5	0.47673	0.19052		626.5	0.11255	0.18251
			626	0.47655	0.19113		626	0.11267	0.1826
			625.5	0.4764	0.19172		625.5	0.11279	0.18269
			625	0.47623	0.19231		625	0.11292	0.18282
			624.5	0.47607	0.19286		624.5	0.11304	0.18294
			624	0.47589	0.19349		624	0.11314	0.18305
			623.5	0.4757	0.19407		623.5	0.1133	0.18316
			623	0.4755	0.19464		623	0.11344	0.18323
			622.5	0.4753	0.19524		622.5	0.11357	0.18332
			622	0.47511	0.19581		622	0.11371	0.18346
			621.5	0.47489	0.19637		621.5	0.11384	0.18356
			621	0.47469	0.19697		621	0.11398	0.18366
			620.5	0.47445	0.19756		620.5	0.11412	0.18376
			620	0.47401	0.19794		620	0.11435	0.18376
			619.5	0.47379	0.19851		619.5	0.11448	0.18389
			619	0.47352	0.19911		619	0.11462	0.18398
			618.5	0.47326	0.19969		618.5	0.11475	0.1841
			618	0.47299	0.20031		618	0.11488	0.18421
			617.5	0.47276	0.2009		617.5	0.11502	0.18435
			617	0.4725	0.2015		617	0.11518	0.18444
			616.5	0.47223	0.20206		616.5	0.11532	0.18451
			616	0.47195	0.20269		616	0.11547	0.18461
			615.5	0.47165	0.20329		615.5	0.11561	0.18472
			615	0.47138	0.20392		615	0.11576	0.18483
			614.5	0.47112	0.2045		614.5	0.1159	0.18496
			614	0.4708	0.20512		614	0.11604	0.18509
			613.5	0.47054	0.20573		613.5	0.11619	0.18523
			613	0.47019	0.20636		613	0.11634	0.18531
			612.5	0.46989	0.20695		612.5	0.11648	0.18543
			612	0.46954	0.20758		612	0.11663	0.18555
			611.5	0.46919	0.20818		611.5	0.11678	0.18565
			611	0.46886	0.20879		611	0.11691	0.18577
			610.5	0.46855	0.20939		610.5	0.11706	0.1859
			610	0.46818	0.21		610	0.11719	0.18601
			609.5	0.46782	0.21057		609.5	0.11732	0.18611
			609	0.46746	0.21116		609	0.11748	0.1862
			608.5	0.46713	0.21178		608.5	0.11764	0.18634
			608	0.46676	0.21237		608	0.11777	0.18647
			607.5	0.4664	0.21299		607.5	0.1179	0.18656
			607	0.46604	0.21363		607	0.11804	0.18665
			606.5	0.46564	0.21424		606.5	0.11819	0.18678
			606	0.46526	0.21485		606	0.11831	0.1869
			605.5	0.46484	0.21542		605.5	0.11845	0.18697
			605	0.46444	0.21602		605	0.1186	0.1871
			604.5	0.46402	0.21666		604.5	0.11876	0.18721
			604	0.46361	0.21724		604	0.1189	0.18733
			603.5	0.4632	0.21786		603.5	0.11904	0.18747
			603	0.46277	0.21847		603	0.11918	0.18756
			602.5	0.46234	0.21905		602.5	0.11932	0.18767
			602	0.46193	0.21965		602	0.11946	0.18777
			601.5	0.46147	0.22026		601.5	0.11963	0.18788
			601	0.46102	0.22085		601	0.11975	0.18798
			600.5	0.46055	0.22147		600.5	0.11988	0.1881
			600	0.46009	0.22205		600	0.12002	0.18822
			599.5	0.45961	0.22264		599.5	0.12014	0.18837
			599	0.45914	0.22322		599	0.12027	0.18849
			598.5	0.45867	0.22386		598.5	0.12043	0.18858
			598	0.45821	0.22441		598	0.12057	0.18869
			597.5	0.4577	0.22502		597.5	0.1207	0.18878
			597	0.45724	0.2256		597	0.12082	0.18891
			596.5	0.45672	0.22623		596.5	0.12095	0.18901
			596	0.45627	0.22677		596	0.12108	0.18914
			595.5	0.45575	0.22737		595.5	0.12123	0.18926
			595	0.45523	0.22794		595	0.12137	0.18937
			594.5	0.45468	0.22854		594.5	0.12151	0.18948
			594	0.45417	0.22912		594	0.12166	0.18961
			593.5	0.45365	0.22975		593.5	0.12183	0.18972
			593	0.45312	0.23032		593	0.12195	0.18987
			592.5	0.45256	0.23089		592.5	0.12208	0.18998
			592	0.45202	0.23146		592	0.12221	0.1901
			591.5	0.45142	0.23204		591.5	0.12238	0.19021
			591	0.45082	0.23255		591	0.12252	0.19035
			590.5	0.45026	0.23311		590.5	0.12269	0.19045
			590	0.44968	0.23368		590	0.12285	0.19057
			589.5	0.44909	0.23428		589.5	0.12301	0.1907
			589	0.44851	0.23485		589	0.12314	0.19082
			588.5	0.44792	0.23541		588.5	0.12329	0.19094
			588	0.44735	0.23596		588	0.12344	0.19106
			587.5	0.44673	0.23651		587.5	0.12359	0.19114
			587	0.44615	0.23704		587	0.12375	0.1913
			586.5	0.44553	0.23763		586.5	0.12389	0.1914
			586	0.4449	0.23816		586	0.12405	0.19154
			585.5	0.44428	0.23872		585.5	0.12419	0.19166
			585	0.44368	0.23924		585	0.12433	0.19179
			584.5	0.44304	0.23977		584.5	0.12448	0.19191
			584	0.44242	0.24028		584	0.12462	0.19203
			583.5	0.44177	0.2408		583.5	0.12477	0.1921
			583	0.44112	0.24133		583	0.12492	0.19222
			582.5	0.44044	0.24185		582.5	0.12507	0.19234
			582	0.43978	0.24237		582	0.12523	0.19249
			581.5	0.43911	0.24288		581.5	0.12536	0.19259
			581	0.43842	0.24339		581	0.12552	0.19272
			580.5	0.43772	0.24388		580.5	0.12566	0.19286
			580	0.437	0.2444		580	0.12583	0.19297
			579.5	0.43632	0.24489		579.5	0.12596	0.19307
			579	0.43562	0.24537		579	0.12612	0.19317
			578.5	0.43495	0.24583		578.5	0.12628	0.19328
			578	0.43424	0.24632		578	0.12642	0.19339
			577.5	0.43355	0.24678		577.5	0.12656	0.19351
			577	0.43284	0.24726		577	0.12672	0.19361
			576.5	0.43212	0.24773		576.5	0.12689	0.19372
			576	0.43135	0.24822		576	0.12706	0.19384
			575.5	0.43066	0.24866		575.5	0.12722	0.19399
			575	0.42994	0.24913		575	0.12737	0.19411
			574.5	0.4292	0.24958		574.5	0.12751	0.19423
			574	0.42844	0.25		574	0.12767	0.19435
			573.5	0.4277	0.2504		573.5	0.12781	0.19451
			573	0.42695	0.25082		573	0.12798	0.19463
			572.5	0.42619	0.25124		572.5	0.12813	0.19474
			572	0.42541	0.25166		572	0.12829	0.19486
			571.5	0.42464	0.25206		571.5	0.12843	0.19496
			571	0.42382	0.25246		571	0.12858	0.19507
			570.5	0.42304	0.25282		570.5	0.12873	0.1952
			570	0.42225	0.2532		570	0.12889	0.19532
			569.5	0.42145	0.25356		569.5	0.12903	0.19545
			569	0.42062	0.25393		569	0.1292	0.19556
			568.5	0.41982	0.25427		568.5	0.12936	0.19569
			568	0.419	0.25463		568	0.12954	0.19579
			567.5	0.41821	0.25497		567.5	0.1297	0.19593
			567	0.41739	0.25529		567	0.12986	0.19606
			566.5	0.41657	0.25556		566.5	0.13001	0.19617
			566	0.41571	0.25587		566	0.13015	0.19627
			565.5	0.41489	0.25612		565.5	0.13031	0.19641
			565	0.41405	0.25638		565	0.13046	0.19651
			564.5	0.41323	0.25665		564.5	0.13064	0.19661
			564	0.41237	0.2569		564	0.13081	0.19675
			563.5	0.4115	0.25712		563.5	0.13097	0.19689
			563	0.41063	0.25737		563	0.13112	0.19702
			562.5	0.40975	0.25759		562.5	0.13128	0.19714
			562	0.40889	0.2578		562	0.13145	0.19727
			561.5	0.408	0.25794		561.5	0.13161	0.19741
			561	0.40709	0.25814		561	0.1318	0.19755
			560.5	0.40622	0.25826		560.5	0.13195	0.1977
			560	0.40536	0.25837		560	0.13212	0.19784
			559.5	0.40448	0.2585		559.5	0.13228	0.19795
			559	0.40356	0.25862		559	0.13244	0.19808
			558.5	0.40266	0.25869		558.5	0.13259	0.19822
			558	0.40175	0.25877		558	0.13276	0.19837
			557.5	0.40082	0.25886		557.5	0.13292	0.19846
			557	0.39992	0.25889		557	0.13307	0.19857
			556.5	0.399	0.25888		556.5	0.13324	0.19873
			556	0.39806	0.25886		556	0.13339	0.19884
			555.5	0.39714	0.25884		555.5	0.13356	0.19901
			555	0.39622	0.25882		555	0.13372	0.19913
			554.5	0.39526	0.25878		554.5	0.1339	0.19924
			554	0.39429	0.25874		554	0.13405	0.19937
			553.5	0.39332	0.25868		553.5	0.13423	0.19951
			553	0.39238	0.25859		553	0.1344	0.19967
			552.5	0.3914	0.25849		552.5	0.13458	0.19981
			552	0.3904	0.25835		552	0.13475	0.19998
			551.5	0.38939	0.25821		551.5	0.13493	0.20008
			551	0.38839	0.25802		551	0.13509	0.2002
			550.5	0.38741	0.25786		550.5	0.13524	0.20033
			550	0.38641	0.25763		550	0.13539	0.20045
			549.5	0.38541	0.2574		549.5	0.13559	0.20057
			549	0.38441	0.25717		549	0.13579	0.20071
			548.5	0.38338	0.25689		548.5	0.13594	0.20085
			548	0.3824	0.2566		548	0.13611	0.20098
			547.5	0.38136	0.25628		547.5	0.13629	0.20114
			547	0.38038	0.25595		547	0.13647	0.20129
			546.5	0.37935	0.25561		546.5	0.13666	0.20142
			546	0.37833	0.25522		546	0.13682	0.20155
			545.5	0.37728	0.25485		545.5	0.13699	0.20166
			545	0.37625	0.2544		545	0.13713	0.20178
			544.5	0.37519	0.25399		544.5	0.1373	0.20191
			544	0.37417	0.25353		544	0.13744	0.20205
			543.5	0.37309	0.25303		543.5	0.1376	0.20219
			543	0.37202	0.2525		543	0.13778	0.20231
			542.5	0.37093	0.25199		542.5	0.13797	0.20242
			542	0.36986	0.2514		542	0.13812	0.20255
			541.5	0.36876	0.25081		541.5	0.13829	0.20267
			541	0.36767	0.25022		541	0.13849	0.20282
			540.5	0.36656	0.24962		540.5	0.13867	0.20291
			540	0.36546	0.24899		540	0.13883	0.20305
			539.5	0.36433	0.24836		539.5	0.13901	0.20318
			539	0.36322	0.24766		539	0.13918	0.20331
			538.5	0.36211	0.24696		538.5	0.13937	0.20343
			538	0.36099	0.24621		538	0.13956	0.20358
			537.5	0.35985	0.24545		537.5	0.13969	0.2037
			537	0.35871	0.24467		537	0.13986	0.2038
			536.5	0.35756	0.24387		536.5	0.14002	0.20389
			536	0.35642	0.24306		536	0.14019	0.20401
			535.5	0.35527	0.24223		535.5	0.14037	0.20414
			535	0.35413	0.24135		535	0.14056	0.20429
			534.5	0.35295	0.24049		534.5	0.14076	0.20441
			534	0.35178	0.23959		534	0.14097	0.20456
			533.5	0.3506	0.23867		533.5	0.14114	0.2047
			533	0.34944	0.23769		533	0.1413	0.20483
			532.5	0.34826	0.23673		532.5	0.14149	0.20495
			532	0.34703	0.23573		532	0.14168	0.20507
			531.5	0.34586	0.23472		531.5	0.14186	0.20517
			531	0.34466	0.23367		531	0.14202	0.20528
			530.5	0.34344	0.23264		530.5	0.14218	0.20541
			530	0.34224	0.23156		530	0.14236	0.20553
			529.5	0.34104	0.23048		529.5	0.14256	0.20566
			529	0.33983	0.22938		529	0.14275	0.20578
			528.5	0.3386	0.22824		528.5	0.14292	0.20591
			528	0.33732	0.2271		528	0.14313	0.20603
			527.5	0.33609	0.22593		527.5	0.1433	0.20616
			527	0.33486	0.22475		527	0.14347	0.20629
			526.5	0.33363	0.22356		526.5	0.14364	0.20641
			526	0.33236	0.22237		526	0.14384	0.20652
			525.5	0.33113	0.22116		525.5	0.14401	0.20665
			525	0.32986	0.21987		525	0.14419	0.20677
			524.5	0.32862	0.21859		524.5	0.14436	0.20691
			524	0.32733	0.21732		524	0.14458	0.20705
			523.5	0.32611	0.21598		523.5	0.14476	0.20717
			523	0.32484	0.21465		523	0.14496	0.20732
			522.5	0.32357	0.21333		522.5	0.14513	0.20747
			522	0.32232	0.21197		522	0.14531	0.20755
			521.5	0.32109	0.2106		521.5	0.14551	0.20766
			521	0.31981	0.20922		521	0.14571	0.20782
			520.5	0.31857	0.20783		520.5	0.14589	0.20795
			520	0.31728	0.20643		520	0.14609	0.20808
			519.5	0.31604	0.20501		519.5	0.14626	0.20823
			519	0.31478	0.20364		519	0.14644	0.20834
			518.5	0.31351	0.20218		518.5	0.14662	0.20851
			518	0.31224	0.20077		518	0.14679	0.20862
			517.5	0.31101	0.19932		517.5	0.14697	0.20875
			517	0.30973	0.19794		517	0.14717	0.20886
			516.5	0.30849	0.19649		516.5	0.14734	0.20902
			516	0.30727	0.19507		516	0.14754	0.20916
			515.5	0.30605	0.19366		515.5	0.14774	0.20931
			515	0.30479	0.19224		515	0.14793	0.20946
			514.5	0.30359	0.19077		514.5	0.14812	0.20962
			514	0.30235	0.18934		514	0.14831	0.20976
			513.5	0.30117	0.18789		513.5	0.14849	0.20991
			513	0.29998	0.18648		513	0.14869	0.21002
			512.5	0.29879	0.18506		512.5	0.14889	0.21016
			512	0.29765	0.18367		512	0.14908	0.21029
			511.5	0.2965	0.18225		511.5	0.14928	0.21042
			511	0.29533	0.18087		511	0.14947	0.21053
			510.5	0.29419	0.17944		510.5	0.14967	0.21069
			510	0.29331	0.17821		510	0.14984	0.21078
			509.5	0.29216	0.17682		509.5	0.15004	0.2109
			509	0.29105	0.17547		509	0.15023	0.21104
			508.5	0.28994	0.17411		508.5	0.15042	0.21115
			508	0.28888	0.17276		508	0.15063	0.21129
			507.5	0.28778	0.17144		507.5	0.15082	0.21142
			507	0.28673	0.1701		507	0.15103	0.21152
			506.5	0.2857	0.16879		506.5	0.15123	0.21164
			506	0.28471	0.16749		506	0.15144	0.21182
			505.5	0.28368	0.16623		505.5	0.15163	0.21195
			505	0.28272	0.16496		505	0.15182	0.21209
			504.5	0.28175	0.16374		504.5	0.15203	0.21226
			504	0.28081	0.1625		504	0.15222	0.21237
			503.5	0.27984	0.16133		503.5	0.15243	0.21252
			503	0.27897	0.16017		503	0.15262	0.21267
			502.5	0.27809	0.15901		502.5	0.15282	0.21282
			502	0.27721	0.15788		502	0.15303	0.21295
			501.5	0.27639	0.15679		501.5	0.15324	0.21309
			501	0.27557	0.15567		501	0.15344	0.21325
			500.5	0.27479	0.15463		500.5	0.15362	0.21341
			500	0.27405	0.1536		500	0.15381	0.21357
			499.5	0.27332	0.15261		499.5	0.154	0.21373
			499	0.27261	0.15165		499	0.15421	0.21388
			498.5	0.27192	0.15068		498.5	0.15442	0.21402
			498	0.27124	0.14974		498	0.15463	0.21417
			497.5	0.2706	0.14886		497.5	0.15483	0.21436
			497	0.26996	0.14795		497	0.15503	0.21452
			496.5	0.26936	0.1471		496.5	0.15526	0.21466
			496	0.2688	0.14626		496	0.15547	0.2148
			495.5	0.26826	0.14545		495.5	0.15568	0.21496
			495	0.26772	0.14462		495	0.15587	0.21509
			494.5	0.26725	0.14385		494.5	0.15607	0.21526
			494	0.26678	0.14313		494	0.15628	0.21538
			493.5	0.26636	0.14243		493.5	0.15647	0.21555
			493	0.26593	0.14174		493	0.15666	0.2157
			492.5	0.26551	0.14111		492.5	0.15685	0.21587
			492	0.26513	0.14051		492	0.15705	0.21599
			491.5	0.26479	0.13993		491.5	0.15727	0.21614
			491	0.26442	0.13936		491	0.15745	0.21631
			490.5	0.2641	0.13883		490.5	0.15766	0.2165
			490	0.26378	0.13829		490	0.15785	0.21661
			489.5	0.26352	0.13781		489.5	0.15805	0.2168
			489	0.26325	0.13732		489	0.15825	0.21694
			488.5	0.26302	0.13687		488.5	0.15845	0.21709
			488	0.2628	0.13644		488	0.15866	0.21724
			487.5	0.26259	0.13598		487.5	0.15887	0.21741
			487	0.26239	0.13558		487	0.15908	0.21756
			486.5	0.26225	0.1352		486.5	0.15928	0.21772
			486	0.26211	0.13487		486	0.15948	0.21786
			485.5	0.26198	0.13455		485.5	0.15969	0.21802
			485	0.26188	0.13426		485	0.1599	0.21814
			484.5	0.2618	0.13397		484.5	0.16013	0.21829
			484	0.26172	0.13369		484	0.16033	0.21841
			483.5	0.26167	0.13345		483.5	0.16054	0.21855
			483	0.26162	0.13321		483	0.16073	0.2187
			482.5	0.26161	0.13299		482.5	0.16094	0.21885
			482	0.26159	0.13279		482	0.16114	0.21901
			481.5	0.26159	0.1326		481.5	0.16136	0.21915
			481	0.26161	0.13245		481	0.16156	0.21927
			480.5	0.26164	0.1323		480.5	0.16175	0.21941
			480	0.2617	0.13215		480	0.16195	0.21954
			479.5	0.26174	0.13201		479.5	0.16218	0.2197
			479	0.2618	0.13193		479	0.16237	0.21986
			478.5	0.26187	0.13183		478.5	0.1626	0.22003
			478	0.26196	0.13174		478	0.16281	0.22018
			477.5	0.26206	0.13168		477.5	0.16305	0.22032
			477	0.26216	0.13161		477	0.16327	0.22045
			476.5	0.26228	0.13158		476.5	0.16351	0.22061
			476	0.2624	0.13153		476	0.16373	0.2208
			475.5	0.26255	0.13149		475.5	0.16394	0.22097
			475	0.2627	0.13145		475	0.16417	0.22112
			474.5	0.26286	0.13141		474.5	0.16438	0.22127
			474	0.26302	0.13141		474	0.1646	0.22142
			473.5	0.26318	0.1314		473.5	0.16484	0.22159
			473	0.26334	0.13143		473	0.16506	0.22176
			472.5	0.26351	0.13143		472.5	0.16528	0.22193
			472	0.26372	0.13148		472	0.1655	0.22208
			471.5	0.26393	0.13155		471.5	0.16571	0.22224
			471	0.26415	0.13162		471	0.16591	0.22242
			470.5	0.26434	0.13167		470.5	0.16612	0.22257
			470	0.26456	0.13171		470	0.16634	0.22272
			469.5	0.26476	0.13175		469.5	0.16658	0.22285
			469	0.26494	0.13184		469	0.1668	0.22303
			468.5	0.26514	0.13191		468.5	0.167	0.22315
			468	0.26537	0.132		468	0.16723	0.22332
			467.5	0.26555	0.13207		467.5	0.16746	0.22345
			467	0.26578	0.13214		467	0.16766	0.22362
			466.5	0.26599	0.13222		466.5	0.16787	0.22376
			466	0.26622	0.13233		466	0.16808	0.22392
			465.5	0.26645	0.13245		465.5	0.16829	0.22407
			465	0.26667	0.13257		465	0.1685	0.22423
			464.5	0.26692	0.13266		464.5	0.16872	0.22439
			464	0.26716	0.13278		464	0.16894	0.22457
			463.5	0.26743	0.13289		463.5	0.16915	0.22473
			463	0.26769	0.13302		463	0.1694	0.22489
			462.5	0.26794	0.13316		462.5	0.16958	0.225
			462	0.26819	0.1333		462	0.1698	0.2252
			461.5	0.26841	0.13342		461.5	0.17	0.22534
			461	0.26868	0.13355		461	0.17022	0.22553
			460.5	0.26894	0.13365		460.5	0.17044	0.22567
			460	0.2692	0.13381		460	0.17064	0.22584
			459.5	0.26943	0.13393		459.5	0.17086	0.22594
			459	0.2697	0.13412		459	0.17107	0.22611
			458.5	0.26995	0.13426		458.5	0.17129	0.22627
			458	0.2702	0.13445		458	0.1715	0.22646
			457.5	0.27045	0.13462		457.5	0.17173	0.22658
			457	0.27076	0.13478		457	0.17194	0.22674
			456.5	0.27104	0.13496		456.5	0.17214	0.22688
			456	0.27128	0.13512		456	0.17238	0.22704
			455.5	0.27152	0.13525		455.5	0.1726	0.2272
			455	0.27177	0.13544		455	0.17281	0.22735
			454.5	0.27201	0.13561		454.5	0.17305	0.2275
			454	0.27225	0.13581		454	0.17328	0.22766
			453.5	0.27253	0.136		453.5	0.17349	0.22783
			453	0.27282	0.13618		453	0.1737	0.22801
			452.5	0.27309	0.13635		452.5	0.17394	0.22818
			452	0.27335	0.13653		452	0.17415	0.2283
			451.5	0.27365	0.1367		451.5	0.17438	0.22849
			451	0.27394	0.1369		451	0.17461	0.22862
			450.5	0.2742	0.1371		450.5	0.17485	0.22882
			450	0.27442	0.13694		450	0.17564	0.22911
			449.5	0.27468	0.1371		449.5	0.17589	0.22932
			449	0.27492	0.13726		449	0.17613	0.22948
			448.5	0.27518	0.1374		448.5	0.17636	0.22964
			448	0.2754	0.13757		448	0.17658	0.22988
			447.5	0.27566	0.13775		447.5	0.17682	0.23007
			447	0.27592	0.13791		447	0.17707	0.23024
			446.5	0.27617	0.13807		446.5	0.17732	0.23039
			446	0.27643	0.13827		446	0.17754	0.2306
			445.5	0.27669	0.13846		445.5	0.17779	0.23079
			445	0.27691	0.13864		445	0.17803	0.23101
			444.5	0.27712	0.13881		444.5	0.17825	0.23115
			444	0.27737	0.13899		444	0.17851	0.23134
			443.5	0.27761	0.13913		443.5	0.17876	0.23154
			443	0.27781	0.13928		443	0.17899	0.23177
			442.5	0.27807	0.13946		442.5	0.17926	0.23199
			442	0.27828	0.13962		442	0.17952	0.23221
			441.5	0.27852	0.13981		441.5	0.17978	0.23233
			441	0.27874	0.13999		441	0.18002	0.23254
			440.5	0.27896	0.14017		440.5	0.18026	0.23269
			440	0.27915	0.14036		440	0.1805	0.23288
			439.5	0.27934	0.14055		439.5	0.18074	0.23303
			439	0.27952	0.14073		439	0.18101	0.23323
			438.5	0.27974	0.14091		438.5	0.18126	0.2334
			438	0.27995	0.14109		438	0.18151	0.23359
			437.5	0.28016	0.14131		437.5	0.18177	0.23378
			437	0.28036	0.14151		437	0.18202	0.23396
			436.5	0.28057	0.14171		436.5	0.18226	0.23417
			436	0.28083	0.1419		436	0.18253	0.23434
			435.5	0.28103	0.14207		435.5	0.18276	0.23457
			435	0.28126	0.14224		435	0.18304	0.23476
			434.5	0.28143	0.14243		434.5	0.18328	0.23493
			434	0.28167	0.14258		434	0.18353	0.23508
			433.5	0.28189	0.14276		433.5	0.18378	0.23524
			433	0.2821	0.14295		433	0.18404	0.23543
			432.5	0.28232	0.14317		432.5	0.1843	0.23564
			432	0.28253	0.14337		432	0.18457	0.23582
			431.5	0.28278	0.14357		431.5	0.18485	0.23598
			431	0.28297	0.14373		431	0.18511	0.23617
			430.5	0.28316	0.14393		430.5	0.18536	0.23635
			430	0.28339	0.14408		430	0.18563	0.2365
			429.5	0.28356	0.14422		429.5	0.18588	0.23667
			429	0.28375	0.14439		429	0.18616	0.23683
			428.5	0.284	0.14459		428.5	0.18644	0.23699
			428	0.28417	0.14476		428	0.18671	0.23721
			427.5	0.28438	0.14499		427.5	0.18696	0.23737
			427	0.28459	0.14514		427	0.18723	0.2375
			426.5	0.28477	0.14528		426.5	0.18748	0.23767
			426	0.28498	0.14547		426	0.18776	0.23785
			425.5	0.2852	0.14562		425.5	0.18802	0.23806
			425	0.2854	0.14581		425	0.18828	0.23822
			424.5	0.28559	0.14599		424.5	0.18853	0.2384
			424	0.2858	0.14615		424	0.18883	0.23858
			423.5	0.28603	0.14632		423.5	0.18914	0.23877
			423	0.28626	0.14646		423	0.18939	0.23897
			422.5	0.28647	0.14663		422.5	0.18967	0.23917
			422	0.28671	0.14681		422	0.18999	0.23938
			421.5	0.28694	0.14699		421.5	0.19026	0.23958
			421	0.28714	0.14714		421	0.19058	0.23979
			420.5	0.28735	0.14727		420.5	0.19089	0.23997
			420	0.28754	0.14746		420	0.1912	0.24019
			419.5	0.2878	0.14766		419.5	0.19153	0.24037
			419	0.28798	0.14784		419	0.19184	0.2406
			418.5	0.28822	0.14802		418.5	0.19219	0.24082
			418	0.28844	0.14821		418	0.19253	0.24099
			417.5	0.28865	0.14843		417.5	0.19285	0.24121
			417	0.28887	0.14859		417	0.19316	0.24144
			416.5	0.28904	0.14878		416.5	0.19348	0.24167
			416	0.28925	0.1489		416	0.19378	0.24185
			415.5	0.28942	0.14906		415.5	0.19408	0.242
			415	0.28963	0.14925		415	0.19437	0.24215
			414.5	0.28984	0.14941		414.5	0.19467	0.24235
			414	0.29001	0.14962		414	0.19495	0.24258
			413.5	0.29024	0.1498		413.5	0.19524	0.24277
			413	0.29043	0.14996		413	0.19555	0.24294
			412.5	0.29057	0.15011		412.5	0.19586	0.24313
			412	0.29075	0.1503		412	0.19614	0.24331
			411.5	0.29089	0.15047		411.5	0.19647	0.24351
			411	0.29109	0.15064		411	0.19675	0.24368
			410.5	0.29126	0.15084		410.5	0.19707	0.24389
			410	0.29148	0.15078		410	0.19733	0.24404
			409.5	0.29168	0.15097		409.5	0.19761	0.24416
			409	0.29194	0.15115		409	0.19788	0.24437
			408.5	0.2922	0.15136		408.5	0.19814	0.24457
			408	0.2924	0.15152		408	0.19845	0.24483
			407.5	0.29261	0.15178		407.5	0.19875	0.24498
			407	0.2928	0.15195		407	0.19906	0.24515
			406.5	0.293	0.15218		406.5	0.19935	0.24534
			406	0.29324	0.15239		406	0.19957	0.24553
			405.5	0.29346	0.15255		405.5	0.1998	0.24566
			405	0.29365	0.15269		405	0.20007	0.24583
			404.5	0.29382	0.15291		404.5	0.20037	0.246
			404	0.29403	0.1531		404	0.20063	0.24619
			403.5	0.29419	0.15333		403.5	0.20096	0.24639
			403	0.29434	0.1535		403	0.20126	0.24658
			402.5	0.29454	0.15367		402.5	0.20158	0.24671
			402	0.2947	0.15384		402	0.20191	0.24694
			401.5	0.29488	0.15401		401.5	0.20224	0.24706
			401	0.2951	0.15422		401	0.20255	0.24728
			400.5	0.29529	0.15442		400.5	0.20285	0.24742
			400	0.29546	0.15461		400	0.20314	0.24769
			399.5	0.29565	0.15477		399.5	0.20352	0.2479
			399	0.29587	0.1549		399	0.20383	0.24809
			398.5	0.29604	0.15508		398.5	0.2042	0.24828
			398	0.29621	0.15523		398	0.2045	0.24848
			397.5	0.29646	0.15541		397.5	0.20483	0.24861
			397	0.29664	0.15555		397	0.20517	0.24883
			396.5	0.29684	0.15571		396.5	0.2055	0.24905
			396	0.29698	0.15589		396	0.20584	0.24924
			395.5	0.29719	0.15602		395.5	0.20615	0.24948
			395	0.29739	0.15623		395	0.20643	0.24965
			394.5	0.2976	0.15642		394.5	0.20675	0.24985
			394	0.29778	0.15661		394	0.20707	0.25006
			393.5	0.29794	0.15684		393.5	0.2074	0.25028
			393	0.29805	0.15699		393	0.20775	0.2505
			392.5	0.29814	0.15714		392.5	0.2081	0.25068
			392	0.29831	0.1573		392	0.20843	0.25091
			391.5	0.29845	0.15739		391.5	0.2088	0.25111
			391	0.2986	0.15762		391	0.20912	0.25127
			390.5	0.29875	0.15778		390.5	0.20945	0.25143
			390	0.29884	0.15791		390	0.20987	0.25169
			389.5	0.29892	0.15802		389.5	0.21031	0.25196
			389	0.29898	0.15817		389	0.21067	0.25215
			388.5	0.29915	0.15831		388.5	0.21102	0.25238
			388	0.29929	0.15846		388	0.21139	0.25258
			387.5	0.29943	0.15859		387.5	0.21174	0.25272
			387	0.29961	0.15878		387	0.21204	0.25294
			386.5	0.29973	0.15893		386.5	0.21237	0.25316
			386	0.29987	0.15909		386	0.21269	0.25326
			385.5	0.29999	0.15924		385.5	0.21303	0.25352
			385	0.30005	0.15934		385	0.21336	0.2537
			384.5	0.3002	0.15947		384.5	0.2137	0.25386
			384	0.30037	0.15966		384	0.21406	0.25406
			383.5	0.30048	0.15982		383.5	0.21437	0.2542
			383	0.30062	0.15999		383	0.21469	0.25439
			382.5	0.30076	0.1601		382.5	0.21499	0.25459
			382	0.30087	0.16025		382	0.21538	0.25477
			381.5	0.30096	0.16042		381.5	0.21573	0.25506
			381	0.301	0.16057		381	0.21608	0.25528
			380.5	0.30109	0.16069		380.5	0.21645	0.25545
			380	0.30125	0.16076		380	0.21682	0.25562
			379.5	0.30137	0.16088		379.5	0.2172	0.25578
			379	0.30152	0.16097		379	0.21759	0.25601
			378.5	0.30165	0.16115		378.5	0.21795	0.25625
			378	0.30177	0.16131		378	0.21829	0.25645
			377.5	0.30191	0.1614		377.5	0.21869	0.25671
			377	0.30203	0.16158		377	0.21905	0.25688
			376.5	0.30219	0.16167		376.5	0.21944	0.25703
			376	0.30233	0.1618		376	0.21977	0.25716
			375.5	0.30244	0.16195		375.5	0.22017	0.2574
			375	0.30254	0.16198		375	0.22054	0.25759
			374.5	0.30261	0.16203		374.5	0.2209	0.2578
			374	0.30271	0.16218		374	0.22126	0.25799
			373.5	0.30286	0.1623		373.5	0.22157	0.25825
			373	0.30301	0.16247		373	0.22191	0.25845
			372.5	0.3031	0.16255		372.5	0.22224	0.2586
			372	0.30319	0.16262		372	0.22256	0.25874
			371.5	0.30324	0.16275		371.5	0.22289	0.25896
			371	0.30331	0.16283		371	0.22324	0.25913
			370.5	0.30341	0.16292		370.5	0.22359	0.25936
			370	0.30261	0.16263		370	0.22377	0.25937
			369.5	0.30277	0.1627		369.5	0.22415	0.25968
			369	0.30291	0.16285		369	0.22454	0.2598
			368.5	0.30299	0.16297		368.5	0.22492	0.25998
			368	0.30316	0.1631		368	0.22531	0.2602
			367.5	0.30336	0.16318		367.5	0.2257	0.26044
			367	0.30347	0.16323		367	0.22603	0.26059
			366.5	0.30365	0.16332		366.5	0.22648	0.26087
			366	0.30377	0.16339		366	0.22683	0.26103
			365.5	0.30385	0.16348		365.5	0.22718	0.26128
			365	0.3039	0.16348		365	0.22753	0.26144
			364.5	0.30393	0.16365		364.5	0.22786	0.26163
			364	0.30408	0.16376		364	0.22825	0.2618
			363.5	0.30418	0.16391		363.5	0.22866	0.26201
			363	0.30424	0.16394		363	0.22913	0.26223
			362.5	0.30436	0.16396		362.5	0.22953	0.26237
			362	0.30443	0.16401		362	0.22991	0.26261
			361.5	0.30451	0.16407		361.5	0.23021	0.26284
			361	0.30449	0.16422		361	0.23065	0.26311
			360.5	0.30454	0.16434		360.5	0.23105	0.26328
			360	0.30462	0.16441		360	0.23129	0.26343
			359.5	0.30463	0.1645		359.5	0.23165	0.26362
			359	0.30462	0.16458		359	0.23204	0.26377
			358.5	0.3048	0.16472		358.5	0.23237	0.26395
			358	0.30497	0.16482		358	0.23274	0.26403
			357.5	0.30509	0.16491		357.5	0.2331	0.26421
			357	0.3051	0.16502		357	0.23343	0.26439
			356.5	0.30523	0.16513		356.5	0.23372	0.2645
			356	0.30532	0.16522		356	0.23413	0.26467
			355.5	0.30537	0.16529		355.5	0.23459	0.26484
			355	0.30553	0.16537		355	0.23495	0.26499
			354.5	0.30561	0.16548		354.5	0.23532	0.2652
			354	0.30574	0.16561		354	0.23567	0.26547
			353.5	0.30584	0.16576		353.5	0.23604	0.26564
			353	0.30593	0.16586		353	0.23632	0.26583
			352.5	0.30601	0.16598		352.5	0.23671	0.26598
			352	0.30617	0.16615		352	0.23696	0.26616
			351.5	0.30625	0.16623		351.5	0.23739	0.26634
			351	0.30641	0.16636		351	0.23778	0.26661
			350.5	0.30658	0.1665		350.5	0.23814	0.26671
			350	0.30679	0.16671		350	0.23852	0.26695
			349.5	0.30711	0.16698		349.5	0.23877	0.2671
			349	0.30732	0.16728		349	0.23909	0.26729
			348.5	0.30746	0.16745		348.5	0.23951	0.26754
			348	0.30767	0.16758		348	0.23992	0.26778
			347.5	0.30787	0.16785		347.5	0.24021	0.26797
			347	0.30814	0.16808		347	0.24051	0.26814
			346.5	0.30834	0.16833		346.5	0.24084	0.2683
			346	0.30857	0.16863		346	0.24117	0.26848
			345.5	0.30883	0.16894		345.5	0.24157	0.26858
			345	0.30915	0.16916		345	0.24185	0.26867
			344.5	0.30953	0.16943		344.5	0.24216	0.26882
			344	0.30982	0.1698		344	0.24253	0.26901
			343.5	0.31016	0.17007		343.5	0.2429	0.26926
			343	0.31042	0.17046		343	0.2432	0.26942
			342.5	0.31075	0.1708		342.5	0.24357	0.26963
			342	0.31108	0.17118		342	0.24398	0.26981
			341.5	0.31136	0.17156		341.5	0.24436	0.26989
			341	0.31166	0.17186		341	0.24473	0.27003
			340.5	0.31197	0.17213		340.5	0.24514	0.27021
			340	0.31074	0.17138		340	0.24463	0.2693
			339.5	0.31112	0.17165		339.5	0.24502	0.26951
			339	0.31148	0.17196		339	0.24531	0.26966
			338.5	0.31182	0.17232		338.5	0.24557	0.26983
			338	0.31221	0.17264		338	0.2459	0.27004
			337.5	0.31257	0.173		337.5	0.2462	0.27027
			337	0.31285	0.17342		337	0.24665	0.27039
			336.5	0.31314	0.17367		336.5	0.24709	0.27053
			336	0.3136	0.17401		336	0.24733	0.27071
			335.5	0.3139	0.1744		335.5	0.24761	0.27095
			335	0.31427	0.17474		335	0.24793	0.27112
			334.5	0.3146	0.17497		334.5	0.24827	0.27122
			334	0.315	0.17533		334	0.24864	0.2713
			333.5	0.31544	0.17569		333.5	0.24895	0.27143
			333	0.31594	0.1761		333	0.24925	0.27166
			332.5	0.31634	0.17644		332.5	0.24959	0.27183
			332	0.31673	0.1768		332	0.24993	0.272
			331.5	0.31711	0.17708		331.5	0.2503	0.27215
			331	0.31759	0.17731		331	0.2506	0.2724
			330.5	0.318	0.17777		330.5	0.25098	0.27257
			330	0.31838	0.17814		330	0.25134	0.27258
			329.5	0.31877	0.17853		329.5	0.2517	0.27271
			329	0.31926	0.17888		329	0.25203	0.27281
			328.5	0.3197	0.17925		328.5	0.25239	0.27287
			328	0.32014	0.17958		328	0.25272	0.2731
			327.5	0.32067	0.1799		327.5	0.25304	0.27332
			327	0.3211	0.18026		327	0.25334	0.27342
			326.5	0.3216	0.1806		326.5	0.25365	0.27355
			326	0.322	0.18092		326	0.25407	0.27373
			325.5	0.32244	0.18133		325.5	0.25447	0.27391
			325	0.32294	0.18177		325	0.25478	0.27408
			324.5	0.32354	0.18218		324.5	0.25521	0.27417
			324	0.32397	0.18264		324	0.25559	0.27432
			323.5	0.32448	0.18308		323.5	0.25599	0.27438
			323	0.3249	0.18338		323	0.25643	0.27448
			322.5	0.32536	0.18367		322.5	0.25683	0.27463
			322	0.32589	0.1841		322	0.2572	0.27471
			321.5	0.32627	0.1845		321.5	0.25759	0.27487
			321	0.32683	0.18485		321	0.25791	0.27511
			320.5	0.32726	0.18522		320.5	0.25819	0.27526
			320	0.32767	0.18563		320	0.25859	0.27536
			319.5	0.32817	0.18599		319.5	0.25897	0.27553
			319	0.32866	0.18627		319	0.25939	0.27552
			318.5	0.3291	0.18673		318.5	0.25981	0.2757
			318	0.32954	0.18718		318	0.26017	0.27596
			317.5	0.32991	0.18755		317.5	0.26052	0.27616
			317	0.33029	0.18787		317	0.26091	0.27635
			316.5	0.33078	0.18832		316.5	0.2613	0.2765
			316	0.33127	0.18876		316	0.26165	0.2766
			315.5	0.33174	0.1892		315.5	0.26203	0.27679
			315	0.33215	0.18962		315	0.26248	0.27694
			314.5	0.33254	0.18994		314.5	0.26285	0.277
			314	0.33302	0.19027		314	0.2632	0.27722
			313.5	0.33354	0.1907		313.5	0.26356	0.27742
			313	0.33396	0.19102		313	0.26403	0.2776
			312.5	0.33442	0.19141		312.5	0.2644	0.27783
			312	0.33483	0.19184		312	0.26475	0.27791
			311.5	0.33524	0.19225		311.5	0.26525	0.2781
			311	0.3357	0.19255		311	0.26569	0.27827
			310.5	0.33611	0.1929		310.5	0.26611	0.27845
			310	0.33653	0.19327		310	0.26649	0.27861
			309.5	0.33693	0.19362		309.5	0.2668	0.27884
			309	0.33738	0.19391		309	0.26727	0.27903
			308.5	0.33776	0.19433		308.5	0.26757	0.27918
			308	0.33821	0.1946		308	0.26798	0.27937
			307.5	0.33853	0.19491		307.5	0.26832	0.2796
			307	0.33892	0.19535		307	0.26865	0.27973
			306.5	0.33935	0.19578		306.5	0.2691	0.27988
			306	0.33973	0.19609		306	0.26946	0.28007
			305.5	0.34021	0.19642		305.5	0.26985	0.28016
			305	0.34062	0.19674		305	0.27025	0.28027
			304.5	0.34112	0.19711		304.5	0.27068	0.28041
			304	0.34151	0.19748		304	0.27109	0.28058
			303.5	0.34193	0.19778		303.5	0.27154	0.28068
			303	0.34224	0.1982		303	0.27186	0.28095
			302.5	0.34266	0.19863		302.5	0.27219	0.28112
			302	0.34307	0.19901		302	0.27255	0.28117
			301.5	0.3435	0.19939		301.5	0.27296	0.2814
			301	0.34399	0.19973		301	0.27331	0.28151
			300.5	0.34441	0.2		300.5	0.27368	0.28168
			300	0.34475	0.20034		300	0.27408	0.28187
			299.5	0.34517	0.20066		299.5	0.27448	0.28203
			299	0.34564	0.20109		299	0.27482	0.28231
			298.5	0.34614	0.20144		298.5	0.27521	0.28253
			298	0.34656	0.20189		298	0.27562	0.28266
			297.5	0.34697	0.20213		297.5	0.27608	0.28282
			297	0.34742	0.20251		297	0.27648	0.28295
			296.5	0.34786	0.20285		296.5	0.27685	0.28306
			296	0.34833	0.20317		296	0.27724	0.28323
			295.5	0.34883	0.20357		295.5	0.27752	0.28335
			295	0.34925	0.20395		295	0.27788	0.28354
			294.5	0.34967	0.20423		294.5	0.27821	0.28366
			294	0.3501	0.20457		294	0.27859	0.28383
			293.5	0.35056	0.20485		293.5	0.27896	0.28396
			293	0.35105	0.20514		293	0.27925	0.28415
			292.5	0.35154	0.20544		292.5	0.27963	0.28431
			292	0.35202	0.20581		292	0.27999	0.28441
			291.5	0.35243	0.20616		291.5	0.28032	0.28455
			291	0.35291	0.20649		291	0.28066	0.28476
			290.5	0.35332	0.20681		290.5	0.28095	0.28495
			290	0.35375	0.20722		290	0.28131	0.28512
			289.5	0.35413	0.20765		289.5	0.28166	0.2853
			289	0.3545	0.20802		289	0.28198	0.28549
			288.5	0.35484	0.20836		288.5	0.28231	0.28565
			288	0.35536	0.2087		288	0.28266	0.28582
			287.5	0.35586	0.2091		287.5	0.28298	0.28597
			287	0.35637	0.20949		287	0.28339	0.28615
			286.5	0.35677	0.20981		286.5	0.28379	0.28633
			286	0.35716	0.21015		286	0.28416	0.28654
			285.5	0.35759	0.21043		285.5	0.28451	0.28665
			285	0.35802	0.21077		285	0.28491	0.28687
			284.5	0.35842	0.21116		284.5	0.28525	0.28704
			284	0.35884	0.21155		284	0.28559	0.28714
			283.5	0.35927	0.21192		283.5	0.28596	0.28731
			283	0.35964	0.21222		283	0.28637	0.2874
			282.5	0.36003	0.21255		282.5	0.28669	0.28757
			282	0.36048	0.21287		282	0.28704	0.28772
			281.5	0.36087	0.21333		281.5	0.28737	0.2879
			281	0.36128	0.21368		281	0.28771	0.2881
			280.5	0.36167	0.21405		280.5	0.28807	0.2883
			280	0.36205	0.21444		280	0.28842	0.28849
			279.5	0.36242	0.21477		279.5	0.28875	0.28865
			279	0.36281	0.21518		279	0.28914	0.28885
			278.5	0.36314	0.21553		278.5	0.2895	0.28908
			278	0.36355	0.21583		278	0.28982	0.28925
			277.5	0.36384	0.21617		277.5	0.29021	0.28941
			277	0.36412	0.21651		277	0.29056	0.2895
			276.5	0.36434	0.21687		276.5	0.29091	0.28981
			276	0.36465	0.21716		276	0.29129	0.2901
			275.5	0.36499	0.21742		275.5	0.29164	0.29034
			275	0.36526	0.21769		275	0.29198	0.29051
			274.5	0.36556	0.21799		274.5	0.29232	0.29067
			274	0.36579	0.21827		274	0.29268	0.29091
			273.5	0.36613	0.21848		273.5	0.29304	0.29113
			273	0.36638	0.21873		273	0.29339	0.29139
			272.5	0.36664	0.21905		272.5	0.29373	0.29168
			272	0.36682	0.2193		272	0.29406	0.2919
			271.5	0.36699	0.21955		271.5	0.2944	0.29215
			271	0.36714	0.21974		271	0.29467	0.29231
			270.5	0.36735	0.21996		270.5	0.295	0.29257
			270	0.36751	0.22009		270	0.29535	0.29278
			269.5	0.36765	0.22033		269.5	0.29568	0.29303
			269	0.36776	0.22051		269	0.29599	0.29317
			268.5	0.36795	0.2207		268.5	0.29632	0.29347
			268	0.36815	0.22082		268	0.29665	0.29375
			267.5	0.36824	0.22095		267.5	0.29699	0.29404
			267	0.36836	0.22109		267	0.29724	0.29423
			266.5	0.36843	0.22131		266.5	0.29755	0.29448
			266	0.36845	0.22142		266	0.29781	0.29477
			265.5	0.36852	0.22146		265.5	0.29812	0.29499
			265	0.36852	0.22156		265	0.29841	0.29517
			264.5	0.36852	0.22158		264.5	0.29873	0.29542
			264	0.36856	0.22166		264	0.29903	0.2957
			263.5	0.36855	0.22173		263.5	0.29938	0.29603
			263	0.36856	0.22173		263	0.29963	0.29626
			262.5	0.36864	0.22183		262.5	0.29992	0.29652
			262	0.36858	0.22193		262	0.3002	0.2969
			261.5	0.36863	0.22199		261.5	0.30051	0.29718
			261	0.36866	0.22204		261	0.30082	0.29751
			260.5	0.36872	0.22203		260.5	0.30112	0.29773
			260	0.36869	0.22201		260	0.30135	0.29794
			259.5	0.36868	0.2221		259.5	0.30166	0.29823
			259	0.36868	0.22213		259	0.30196	0.29853
			258.5	0.36867	0.22217		258.5	0.30226	0.29892
			258	0.36862	0.22217		258	0.3025	0.29925
			257.5	0.3686	0.22218		257.5	0.30277	0.29963
			257	0.36868	0.22217		257	0.30302	0.2999
			256.5	0.36864	0.22213		256.5	0.30328	0.3002
			256	0.36871	0.22213		256	0.30357	0.30059
			255.5	0.36868	0.22207		255.5	0.30385	0.30091
			255	0.3687	0.22208		255	0.30417	0.30125
			254.5	0.36872	0.22205		254.5	0.30438	0.30153
			254	0.36875	0.22208		254	0.30462	0.30186
			253.5	0.36873	0.22203		253.5	0.30483	0.30221
			253	0.36875	0.22199		253	0.30507	0.30259
			252.5	0.36872	0.22197		252.5	0.30533	0.30293
			252	0.36871	0.22192		252	0.30558	0.30333
			251.5	0.36871	0.22188		251.5	0.30578	0.3037
			251	0.36877	0.22184		251	0.30604	0.30415
			250.5	0.3688	0.22175		250.5	0.30633	0.30453
			250	0.36882	0.22171		250	0.30661	0.30494
			249.5	0.36881	0.2217		249.5	0.30684	0.30529
			249	0.36886	0.22159		249	0.30705	0.30571
			248.5	0.3689	0.22159		248.5	0.30726	0.30614
			248	0.36896	0.22156		248	0.30749	0.30648
			247.5	0.36906	0.22151		247.5	0.3077	0.30683
			247	0.36912	0.2215		247	0.30795	0.30719
			246.5	0.36921	0.22141		246.5	0.30822	0.30756
			246	0.36934	0.22138		246	0.30846	0.30782
			245.5	0.36934	0.22134		245.5	0.30866	0.30814
			245	0.36937	0.22127		245	0.30891	0.30852
			244.5	0.36937	0.22118		244.5	0.30914	0.30893
			244	0.36944	0.2212		244	0.3094	0.30933
			243.5	0.36951	0.22113		243.5	0.30963	0.30974
			243	0.3696	0.22109		243	0.30988	0.31014
			242.5	0.36965	0.22102		242.5	0.31007	0.3105
			242	0.36978	0.22089		242	0.31035	0.31085
			241.5	0.36982	0.22081		241.5	0.31056	0.31126
			241	0.36989	0.22076		241	0.31083	0.31164
			240.5	0.37	0.22072		240.5	0.31113	0.31205
			240	0.36998	0.22061		240	0.31143	0.31245
			239.5	0.37006	0.22048		239.5	0.31167	0.31292
			239	0.37021	0.22037		239	0.31197	0.31331
			238.5	0.37023	0.22031		238.5	0.31228	0.31377
			238	0.37034	0.22021		238	0.3126	0.31419
			237.5	0.3704	0.22014		237.5	0.31291	0.3146
			237	0.37051	0.22002		237	0.31321	0.31505
			236.5	0.37063	0.21994		236.5	0.31348	0.31542
			236	0.37066	0.21992		236	0.31374	0.31578
			235.5	0.37077	0.21981		235.5	0.31399	0.31615
			235	0.37084	0.21969		235	0.31426	0.31656
			234.5	0.37093	0.2196		234.5	0.31455	0.31695
			234	0.37108	0.21948		234	0.31489	0.31731
			233.5	0.37127	0.21936		233.5	0.31523	0.31783
			233	0.37141	0.21924		233	0.3156	0.31829
			232.5	0.37151	0.21917		232.5	0.31593	0.31876
			232	0.37159	0.21904		232	0.31626	0.31916
			231.5	0.37167	0.21893		231.5	0.31657	0.31962
			231	0.37179	0.21878		231	0.31689	0.32009
			230.5	0.37183	0.21865		230.5	0.31724	0.32055
			230	0.37194	0.21843		230	0.31756	0.32104
			229.5	0.37206	0.21834		229.5	0.31794	0.32161
			229	0.37218	0.21829		229	0.31828	0.32209
			228.5	0.3723	0.2183		228.5	0.3186	0.32254
			228	0.37241	0.21823		228	0.319	0.32304
			227.5	0.37251	0.21809		227.5	0.3194	0.32356
			227	0.37259	0.21798		227	0.3198	0.32412
			226.5	0.37274	0.21788		226.5	0.32025	0.32466
			226	0.37285	0.21784		226	0.32065	0.32518
			225.5	0.37298	0.21789		225.5	0.3211	0.32556
			225	0.37303	0.21786		225	0.32154	0.32606
			224.5	0.37316	0.21778		224.5	0.32194	0.32648
			224	0.37327	0.21771		224	0.32235	0.3269
			223.5	0.37344	0.21772		223.5	0.32283	0.32735
			223	0.37356	0.21771		223	0.32321	0.32788
			222.5	0.37366	0.21771		222.5	0.32369	0.32834
			222	0.37373	0.2177		222	0.32411	0.32882
			221.5	0.37389	0.21765		221.5	0.32457	0.32935
			221	0.3739	0.21763		221	0.32509	0.32979
			220.5	0.37395	0.21757		220.5	0.32559	0.33034
			220	0.37408	0.21754		220	0.32609	0.33085
			219.5	0.37416	0.21755		219.5	0.32663	0.33136
			219	0.37421	0.2176		219	0.32716	0.33187
			218.5	0.37438	0.21759		218.5	0.32766	0.33237
			218	0.37441	0.21752		218	0.32815	0.33292
			217.5	0.37441	0.21753		217.5	0.3287	0.33338
			217	0.37448	0.21752		217	0.32916	0.3339
			216.5	0.37464	0.21751		216.5	0.32969	0.33436
			216	0.37467	0.21746		216	0.33026	0.33493
			215.5	0.37472	0.21745		215.5	0.33085	0.33538
			215	0.37471	0.21739		215	0.33146	0.33591
			214.5	0.37477	0.21739		214.5	0.33196	0.33637
			214	0.37477	0.21736		214	0.33253	0.33689
			213.5	0.37479	0.21729		213.5	0.33301	0.33728
			213	0.37487	0.21714		213	0.33356	0.33777
			212.5	0.37502	0.21701		212.5	0.33408	0.33824
			212	0.37508	0.21678		212	0.33459	0.33871
			211.5	0.37516	0.21657		211.5	0.33505	0.33916
			211	0.37525	0.21629		211	0.33553	0.33952
			210.5	0.37531	0.21599		210.5	0.33605	0.33988
			210	0.37536	0.2156		210	0.33659	0.34029
			209.5	0.37544	0.2151		209.5	0.33711	0.34074
			209	0.37557	0.2145		209	0.33764	0.34109
			208.5	0.37558	0.21391		208.5	0.33819	0.34146
			208	0.37569	0.21325		208	0.33872	0.34191
			207.5	0.3757	0.21254		207.5	0.3392	0.34231
			207	0.37567	0.21172		207	0.33968	0.34275
			206.5	0.37583	0.21087		206.5	0.34008	0.34317
			206	0.37594	0.21003		206	0.34062	0.34354
			205.5	0.37597	0.20927		205.5	0.34105	0.34391
			205	0.376	0.20851		205	0.34142	0.34444
			204.5	0.37601	0.20787		204.5	0.34187	0.34484
			204	0.37599	0.20712		204	0.3424	0.34521
			203.5	0.37598	0.20637		203.5	0.34277	0.34557
			203	0.37594	0.2054		203	0.34322	0.346
			202.5	0.37601	0.20477		202.5	0.34371	0.34639
[truncated: 5 more rows]

## Sheet: Figure 3B
				MPA-Rh NPs
				Cd (II)	Cd (II)	Cd (II)	Cd (II)	Cd (II)	Cd (II)	Cd (II)	Cd (II)	Cd (II)	Cd (II)	Cd (II)	Cd (II)	Cd (II)	Cd (II)
				0 µM	9 µM	19 µM	37 µM	54 µM	71 µM	87 µM	102 µM	117 µM	131 µM	145 µM	159 µM	190 µM	220 µM
			Wavelength	Absorbance	Absorbance	Absorbance	Absorbance	Absorbance	Absorbance	Absorbance	Absorbance	Absorbance	Absorbance	Absorbance	Absorbance	Absorbance	Absorbance
			nm	a.u.	a.u.	a.u.	a.u.	a.u.	a.u.	a.u.	a.u.	a.u.	a.u.	a.u.	a.u.	a.u.	a.u.
			950.491	0.01841	0.02279	0.02601	0.02011	0.03022	0.02638	0.02682	0.03237	0.03261	0.03825	0.03753	0.04274	0.04514	0.0426
			949.747	0.01803	0.02256	0.02549	0.02035	0.03019	0.02645	0.02699	0.03273	0.03255	0.03841	0.03736	0.04196	0.04484	0.04228
			949.004	0.01817	0.02316	0.02585	0.02102	0.03058	0.02642	0.02682	0.03312	0.03307	0.03849	0.0377	0.04253	0.04578	0.0423
			948.26	0.01877	0.02339	0.02634	0.02119	0.03042	0.02684	0.02715	0.03312	0.03319	0.03883	0.03825	0.04276	0.04578	0.04267
			947.515	0.0184	0.02264	0.02585	0.02045	0.0299	0.02636	0.02709	0.03273	0.03282	0.03845	0.03766	0.04242	0.04543	0.0424
			946.738	0.01833	0.02335	0.02598	0.02071	0.03009	0.02698	0.02723	0.03259	0.03316	0.0387	0.0381	0.04241	0.04584	0.04255
			945.993	0.01865	0.02304	0.02594	0.02104	0.03029	0.02667	0.02695	0.03298	0.0331	0.03879	0.03756	0.04198	0.04519	0.04226
			945.248	0.01857	0.02364	0.02592	0.02095	0.03034	0.02704	0.02728	0.0334	0.03339	0.03906	0.03787	0.0422	0.04547	0.04267
			944.503	0.01875	0.02284	0.02574	0.02074	0.03034	0.0268	0.02757	0.03298	0.0335	0.03844	0.03806	0.04202	0.04541	0.04208
			943.757	0.01855	0.02309	0.02624	0.02072	0.03027	0.02691	0.0274	0.03317	0.03318	0.03837	0.03809	0.04158	0.04563	0.04213
			943.01	0.01864	0.02312	0.02579	0.02062	0.03019	0.02658	0.02686	0.03317	0.0332	0.03856	0.03832	0.04172	0.04541	0.04253
			942.264	0.01861	0.02337	0.02619	0.02107	0.0305	0.02711	0.02745	0.03372	0.03328	0.03885	0.03833	0.04174	0.04588	0.04288
			941.485	0.01912	0.02354	0.02644	0.02137	0.03072	0.02715	0.02735	0.03369	0.03347	0.03897	0.0386	0.04192	0.04626	0.04279
			940.738	0.01859	0.02307	0.02631	0.02086	0.03016	0.02658	0.02718	0.03317	0.03342	0.03878	0.03838	0.04136	0.04585	0.04259
			939.99	0.01843	0.02315	0.02627	0.02096	0.03072	0.02687	0.02742	0.03347	0.03358	0.03901	0.03863	0.04105	0.04599	0.04296
			939.243	0.01865	0.02309	0.02615	0.02077	0.03056	0.02718	0.02744	0.03374	0.03349	0.03891	0.03833	0.04089	0.04597	0.04255
			938.495	0.01847	0.02286	0.02622	0.02075	0.02988	0.02686	0.02738	0.03322	0.03346	0.03846	0.03834	0.04066	0.04605	0.04268
			937.746	0.01841	0.02289	0.02571	0.02062	0.03042	0.02714	0.02695	0.03311	0.03312	0.03872	0.0382	0.04048	0.04552	0.04278
			936.998	0.01876	0.02273	0.02618	0.02138	0.0307	0.02721	0.02778	0.03374	0.03369	0.03903	0.039	0.04114	0.04623	0.04328
			936.249	0.01844	0.02288	0.02615	0.02115	0.03084	0.02719	0.02767	0.03322	0.03339	0.03897	0.03888	0.04096	0.04614	0.04287
			935.5	0.01898	0.02301	0.0263	0.02112	0.03092	0.0275	0.02752	0.03368	0.03388	0.03905	0.03876	0.04053	0.04676	0.04345
			934.751	0.0192	0.02295	0.02643	0.02152	0.03048	0.02763	0.02758	0.03363	0.03368	0.03917	0.03905	0.04068	0.04629	0.04307
			934.001	0.01875	0.02289	0.02663	0.02148	0.03058	0.0279	0.02778	0.03403	0.03369	0.03958	0.03927	0.04063	0.04665	0.04356
			933.251	0.01848	0.02281	0.02632	0.02088	0.03075	0.02718	0.02749	0.03328	0.03352	0.03878	0.03891	0.04058	0.04562	0.04285
			932.5	0.01907	0.02274	0.02636	0.02115	0.03056	0.02725	0.02749	0.03372	0.03419	0.03926	0.03914	0.04009	0.04635	0.04315
			931.75	0.01941	0.02306	0.02674	0.02182	0.03116	0.02753	0.02819	0.03452	0.03446	0.04017	0.03922	0.04047	0.04633	0.04364
			930.999	0.01831	0.02286	0.02636	0.02138	0.03047	0.02708	0.02769	0.03372	0.03365	0.03908	0.03886	0.04021	0.04601	0.04282
			930.247	0.01835	0.02246	0.02589	0.02065	0.03047	0.02705	0.02706	0.03385	0.0335	0.03867	0.03864	0.04016	0.04583	0.04289
			929.496	0.01947	0.02353	0.02662	0.02165	0.03153	0.02782	0.02789	0.0349	0.03437	0.03965	0.03919	0.04102	0.04698	0.04367
			928.744	0.01925	0.02284	0.02701	0.02157	0.03115	0.02764	0.0282	0.03445	0.03425	0.04035	0.03991	0.04103	0.04656	0.04396
			927.992	0.01875	0.02286	0.02662	0.02084	0.0304	0.02718	0.02775	0.03411	0.03409	0.03918	0.03894	0.03983	0.04631	0.04283
			927.24	0.01903	0.02334	0.02653	0.02155	0.03097	0.02804	0.02845	0.03444	0.03441	0.03971	0.03901	0.04063	0.04709	0.04392
			926.487	0.01879	0.02311	0.02648	0.02124	0.03088	0.02786	0.02783	0.03461	0.03383	0.04004	0.03869	0.04027	0.04676	0.04343
			925.734	0.01866	0.02293	0.02641	0.02168	0.03052	0.02747	0.02786	0.03441	0.0343	0.03973	0.03959	0.04026	0.04701	0.04386
			925.013	0.01949	0.02321	0.02645	0.02131	0.0313	0.02806	0.02805	0.03415	0.03407	0.04003	0.03958	0.04055	0.04684	0.04359
			924.26	0.01947	0.02352	0.02719	0.02166	0.0311	0.02796	0.02889	0.03471	0.03438	0.03979	0.03973	0.04059	0.04735	0.04454
			923.506	0.01934	0.02354	0.02716	0.02141	0.03146	0.02807	0.02794	0.03454	0.03495	0.0399	0.04048	0.04061	0.04716	0.04425
			922.752	0.01893	0.02279	0.02648	0.02093	0.03035	0.02765	0.02758	0.03445	0.03398	0.03952	0.03934	0.03941	0.04619	0.04324
			921.997	0.01897	0.02323	0.02644	0.02122	0.03088	0.02771	0.02804	0.03423	0.03392	0.03951	0.03982	0.04	0.04662	0.04397
			921.242	0.01946	0.02324	0.0271	0.02161	0.0312	0.028	0.02824	0.03441	0.03496	0.0401	0.03999	0.04031	0.04723	0.0444
			920.487	0.01887	0.02287	0.02679	0.02134	0.03095	0.02762	0.02785	0.03464	0.03416	0.03959	0.04015	0.03998	0.04723	0.044
			919.765	0.01972	0.02358	0.02726	0.02185	0.0315	0.02819	0.02856	0.0349	0.03452	0.04055	0.04057	0.04109	0.04751	0.04426
			919.009	0.01934	0.02356	0.02725	0.02177	0.03107	0.02814	0.02855	0.03477	0.03465	0.04021	0.04037	0.04034	0.04732	0.0441
			918.253	0.0196	0.02344	0.02748	0.02178	0.03096	0.02812	0.02856	0.03504	0.03453	0.04052	0.0404	0.04034	0.04777	0.04428
			917.497	0.01924	0.02341	0.02655	0.02155	0.03117	0.0279	0.02826	0.03446	0.03449	0.03989	0.03987	0.04015	0.04735	0.04429
			916.741	0.0193	0.0236	0.02657	0.02171	0.03217	0.02824	0.02847	0.03454	0.03479	0.03961	0.04018	0.04058	0.0468	0.04516
			915.984	0.01927	0.02353	0.02708	0.02167	0.03185	0.02802	0.02836	0.03463	0.03477	0.04019	0.04024	0.04025	0.04727	0.045
			915.26	0.01905	0.02375	0.02705	0.02161	0.0317	0.02851	0.02872	0.03492	0.03497	0.04014	0.04039	0.04049	0.0474	0.04491
			914.502	0.01914	0.02361	0.02686	0.02173	0.03125	0.02847	0.02878	0.03451	0.03475	0.04009	0.04017	0.04032	0.04724	0.04463
			913.745	0.01919	0.02374	0.02723	0.02179	0.03133	0.02843	0.02858	0.03496	0.03515	0.0403	0.04027	0.04042	0.04756	0.04456
			912.987	0.01912	0.02363	0.02726	0.02158	0.03184	0.02811	0.02904	0.03479	0.03437	0.03992	0.04037	0.04042	0.04734	0.04487
			912.261	0.01958	0.02369	0.02714	0.02197	0.03185	0.0286	0.02906	0.03525	0.03507	0.04042	0.03999	0.04093	0.04747	0.0444
			911.503	0.01962	0.02349	0.02752	0.02223	0.03169	0.02881	0.02907	0.03534	0.03511	0.04066	0.04049	0.04079	0.04777	0.04502
			910.744	0.01973	0.02364	0.02707	0.02187	0.0317	0.02858	0.02926	0.03503	0.03519	0.04071	0.0408	0.04133	0.04755	0.04507
			909.985	0.01955	0.02385	0.02733	0.02194	0.03222	0.02871	0.02926	0.03515	0.03494	0.04043	0.04139	0.04059	0.04795	0.04497
			909.259	0.01909	0.02377	0.02728	0.02168	0.03124	0.02846	0.02877	0.03528	0.03457	0.04066	0.04068	0.04027	0.04749	0.04506
			908.499	0.01947	0.02369	0.0274	0.0217	0.03201	0.02838	0.0288	0.03504	0.03481	0.04082	0.04085	0.04059	0.0476	0.04503
			907.739	0.01963	0.02355	0.02743	0.02216	0.0317	0.02884	0.02899	0.03546	0.03554	0.04121	0.04122	0.04122	0.04789	0.04532
			907.012	0.01959	0.02399	0.02774	0.02244	0.03204	0.0287	0.02934	0.03589	0.0353	0.0413	0.04129	0.04116	0.04874	0.04526
			906.251	0.01988	0.02383	0.0279	0.02236	0.03155	0.02901	0.02941	0.03575	0.03565	0.0415	0.04139	0.04126	0.0489	0.04497
			905.49	0.01957	0.02372	0.02709	0.02188	0.03171	0.02865	0.02908	0.03508	0.03521	0.04027	0.04067	0.04098	0.0479	0.04508
			904.762	0.01986	0.0239	0.02726	0.02199	0.03262	0.02885	0.02918	0.03524	0.03519	0.04069	0.04121	0.04105	0.04781	0.04601
			904.001	0.01968	0.0239	0.02715	0.02229	0.03213	0.02845	0.02929	0.0352	0.03525	0.04075	0.04105	0.04116	0.04808	0.04592
			903.239	0.01963	0.02402	0.02766	0.02244	0.03217	0.02937	0.02951	0.03591	0.0357	0.04126	0.0414	0.04134	0.04902	0.04623
			902.511	0.01953	0.02391	0.02754	0.0225	0.03201	0.02922	0.02968	0.03549	0.03582	0.04079	0.04097	0.04138	0.0484	0.04549
			901.748	0.02012	0.02424	0.0279	0.02249	0.0325	0.02927	0.02974	0.036	0.03589	0.04124	0.04185	0.0416	0.04897	0.04607
			900.986	0.02028	0.02415	0.02796	0.02257	0.03296	0.02968	0.02992	0.0361	0.03597	0.04181	0.04191	0.04175	0.04959	0.0464
			900.256	0.02002	0.0243	0.02785	0.02249	0.0323	0.02954	0.02981	0.03582	0.03601	0.04151	0.0421	0.0415	0.04854	0.04592
			899.493	0.01987	0.02379	0.02756	0.02223	0.03217	0.02882	0.0293	0.03578	0.03544	0.04114	0.04178	0.04148	0.04874	0.04534
			898.763	0.02022	0.02384	0.02771	0.02266	0.03218	0.02945	0.02995	0.03613	0.0361	0.04175	0.04187	0.04179	0.04884	0.0463
			897.999	0.01989	0.02397	0.02789	0.02252	0.03204	0.02953	0.02985	0.03608	0.03615	0.04182	0.04176	0.04156	0.04913	0.04619
			897.235	0.02041	0.02416	0.02831	0.02273	0.03215	0.02978	0.02979	0.036	0.03608	0.0418	0.04197	0.04193	0.04932	0.04629
			896.504	0.02009	0.02418	0.02761	0.02224	0.03207	0.02965	0.02949	0.03566	0.0363	0.04141	0.04175	0.04173	0.04877	0.04595
			895.74	0.02009	0.0247	0.02776	0.02264	0.03354	0.0297	0.02989	0.036	0.03655	0.04145	0.04201	0.04184	0.04864	0.04682
			895.008	0.01984	0.02419	0.02771	0.02249	0.03256	0.02958	0.0298	0.03579	0.03651	0.0415	0.04193	0.042	0.04895	0.04641
			894.243	0.02031	0.02458	0.02794	0.02256	0.03286	0.03003	0.02994	0.03672	0.03668	0.04211	0.04182	0.04197	0.04922	0.04645
			893.511	0.0202	0.02439	0.0281	0.02259	0.03264	0.03001	0.02989	0.03602	0.03647	0.04179	0.04229	0.04182	0.04901	0.04621
			892.746	0.02023	0.02419	0.02806	0.02262	0.03228	0.02981	0.03023	0.03611	0.03655	0.04183	0.04202	0.04236	0.04913	0.04634
			892.013	0.02037	0.02454	0.02835	0.02284	0.0329	0.02988	0.03006	0.03652	0.03677	0.04189	0.04261	0.04207	0.0494	0.0466
			891.247	0.02062	0.02488	0.02811	0.02297	0.03311	0.03014	0.03025	0.03628	0.03701	0.0426	0.04289	0.04245	0.04957	0.04716
			890.514	0.02059	0.02429	0.02835	0.02295	0.03282	0.02973	0.03032	0.03641	0.03683	0.04215	0.04305	0.04231	0.04985	0.04657
			889.747	0.02011	0.02449	0.02805	0.02294	0.03277	0.03041	0.03056	0.03651	0.03696	0.04242	0.04255	0.04245	0.04989	0.0471
			889.014	0.02054	0.0246	0.02798	0.02292	0.03304	0.03017	0.03055	0.03672	0.03628	0.04231	0.04252	0.04273	0.04978	0.04678
			888.246	0.02051	0.0244	0.02809	0.02265	0.03299	0.03045	0.03052	0.03666	0.03736	0.04246	0.04293	0.0422	0.04968	0.04721
			887.512	0.02058	0.02466	0.02849	0.02338	0.03334	0.03063	0.03067	0.03682	0.03694	0.04271	0.04295	0.04292	0.0503	0.04712
			886.744	0.02082	0.0249	0.02855	0.02313	0.03334	0.03053	0.03073	0.03708	0.03738	0.04282	0.04315	0.04287	0.05001	0.04733
			886.01	0.02068	0.02511	0.02869	0.02337	0.03334	0.03057	0.03086	0.03744	0.03771	0.04289	0.04338	0.04308	0.05049	0.04755
			885.241	0.0204	0.02438	0.0283	0.02307	0.03279	0.03029	0.03052	0.03692	0.03706	0.04263	0.04291	0.04242	0.05014	0.04681
			884.506	0.02072	0.02475	0.02886	0.02346	0.03304	0.03068	0.03071	0.03725	0.03699	0.04303	0.04336	0.04289	0.0504	0.0471
			883.737	0.02087	0.02501	0.02875	0.02352	0.03312	0.03107	0.03101	0.03741	0.03755	0.04305	0.04342	0.04326	0.05092	0.04716
			883.002	0.02056	0.02481	0.02804	0.0232	0.03361	0.03068	0.0308	0.03687	0.03731	0.04257	0.04296	0.04286	0.05	0.04764
			882.266	0.02088	0.02516	0.02828	0.02332	0.03384	0.03082	0.03101	0.0372	0.03756	0.04269	0.0432	0.0431	0.05025	0.04796
			881.496	0.02063	0.02504	0.02827	0.02357	0.03405	0.0308	0.03097	0.03704	0.0376	0.04255	0.04314	0.04312	0.05013	0.04825
			880.759	0.02051	0.02506	0.0283	0.0234	0.03388	0.03071	0.03097	0.03724	0.03724	0.0426	0.04327	0.04274	0.04992	0.04824
			879.989	0.02121	0.02538	0.02867	0.02393	0.03391	0.03123	0.03121	0.03748	0.03814	0.04339	0.04369	0.04353	0.05074	0.04805
			879.252	0.02113	0.0256	0.02889	0.02367	0.03423	0.031	0.03135	0.03742	0.03797	0.04354	0.04439	0.04345	0.05073	0.04814
			878.515	0.02091	0.0248	0.02874	0.02311	0.03334	0.03082	0.03079	0.03722	0.03757	0.0431	0.04327	0.04313	0.05016	0.04787
			877.743	0.02102	0.02496	0.02938	0.0235	0.03376	0.03112	0.03168	0.03752	0.03768	0.04356	0.04374	0.04376	0.05077	0.04828
			877.006	0.02089	0.02487	0.02877	0.0236	0.03378	0.03098	0.03112	0.0376	0.03768	0.04306	0.04341	0.04326	0.05046	0.04864
			876.234	0.02114	0.02541	0.02903	0.02326	0.03382	0.03123	0.03164	0.03773	0.03772	0.04331	0.04332	0.04301	0.0509	0.04825
			875.496	0.02114	0.02534	0.02896	0.02347	0.03352	0.03134	0.03132	0.03768	0.03789	0.04363	0.04369	0.04326	0.05056	0.04876
			874.757	0.02117	0.0255	0.02917	0.02416	0.03425	0.03135	0.03172	0.03813	0.03882	0.0439	0.04395	0.04357	0.05113	0.04879
			873.985	0.0214	0.02525	0.02927	0.02458	0.03431	0.0318	0.03202	0.03803	0.03813	0.04359	0.04439	0.04352	0.05189	0.04896
			873.245	0.02127	0.02519	0.02858	0.02394	0.03404	0.03135	0.03106	0.03781	0.03841	0.04409	0.04412	0.04324	0.05169	0.04877
			872.506	0.02096	0.02522	0.02845	0.02387	0.03336	0.03089	0.03154	0.03721	0.03775	0.04376	0.04367	0.04303	0.0508	0.0484
			871.766	0.02088	0.02497	0.02898	0.02407	0.03422	0.03117	0.03145	0.03794	0.03831	0.0444	0.04367	0.04373	0.05116	0.04854
			870.993	0.02122	0.02571	0.02964	0.02419	0.03438	0.03205	0.03194	0.03825	0.03902	0.04437	0.04435	0.04395	0.05181	0.04836
			870.253	0.02135	0.02557	0.02906	0.02418	0.03438	0.03125	0.0324	0.03795	0.03827	0.04374	0.04447	0.044	0.05152	0.04889
			869.512	0.02125	0.02534	0.02922	0.02391	0.03379	0.03139	0.03153	0.03756	0.03829	0.0439	0.04445	0.04361	0.05162	0.04867
			868.738	0.0218	0.02598	0.02974	0.02448	0.0346	0.03185	0.03285	0.03871	0.03834	0.0446	0.04507	0.04421	0.05215	0.05006
			867.997	0.02131	0.02565	0.029	0.02432	0.03452	0.03192	0.03213	0.03863	0.03902	0.04466	0.04479	0.04454	0.05195	0.04922
			867.256	0.02167	0.02567	0.02936	0.02452	0.03455	0.03175	0.03241	0.03872	0.03899	0.04456	0.04473	0.04474	0.05246	0.04896
			866.515	0.0217	0.02632	0.03024	0.02486	0.03506	0.03243	0.03284	0.03892	0.0388	0.04442	0.04587	0.04483	0.05234	0.04985
			865.739	0.02152	0.02565	0.02977	0.02464	0.03476	0.0321	0.03245	0.03862	0.03953	0.04488	0.04531	0.04439	0.05237	0.04961
			864.997	0.02222	0.02632	0.02976	0.02438	0.03461	0.03238	0.03322	0.0392	0.03928	0.04487	0.04587	0.04524	0.0526	0.04882
			864.255	0.022	0.02593	0.02984	0.02473	0.0349	0.0323	0.03235	0.03897	0.03894	0.04492	0.04511	0.04431	0.05243	0.04972
			863.513	0.02205	0.02646	0.03006	0.02513	0.03543	0.03251	0.03348	0.03958	0.03995	0.04554	0.04613	0.04562	0.05255	0.04996
			862.736	0.02175	0.02587	0.02916	0.0245	0.0351	0.03259	0.03241	0.03902	0.03909	0.04515	0.04534	0.04473	0.05262	0.04948
			861.993	0.02166	0.02595	0.02951	0.02451	0.03536	0.03247	0.03231	0.03895	0.03938	0.04487	0.04571	0.04442	0.05237	0.04946
			861.25	0.02183	0.02583	0.02922	0.02434	0.03469	0.03203	0.03244	0.0392	0.03936	0.04474	0.04529	0.04449	0.05184	0.04936
			860.506	0.02182	0.02638	0.0299	0.02489	0.03523	0.03248	0.03339	0.03991	0.03944	0.04526	0.04602	0.04508	0.05283	0.05034
			859.763	0.02173	0.02608	0.03002	0.02434	0.03507	0.03198	0.033	0.03942	0.03934	0.0456	0.04575	0.04508	0.05198	0.04994
			858.985	0.02158	0.02632	0.03011	0.02487	0.03549	0.03213	0.03293	0.03961	0.03953	0.04558	0.04606	0.04497	0.05296	0.05033
			858.241	0.02222	0.02634	0.02998	0.02536	0.03522	0.03255	0.0333	0.0397	0.03977	0.04547	0.04591	0.04486	0.05267	0.0502
			857.496	0.02188	0.0264	0.02977	0.02433	0.03464	0.032	0.03267	0.03915	0.03941	0.04504	0.04499	0.04457	0.05194	0.04993
			856.751	0.02265	0.02672	0.03019	0.02537	0.03569	0.03305	0.03369	0.04023	0.03974	0.04564	0.0465	0.04573	0.05321	0.05015
			856.006	0.02167	0.02569	0.02992	0.025	0.03494	0.03192	0.03238	0.03937	0.03947	0.04532	0.04555	0.04609	0.05288	0.04969
			855.261	0.02284	0.02721	0.03053	0.02574	0.03613	0.03328	0.03407	0.04003	0.04074	0.04632	0.04657	0.04655	0.05341	0.05093
			854.516	0.02145	0.02648	0.03013	0.02443	0.03433	0.03249	0.03253	0.03924	0.03893	0.04488	0.04545	0.04505	0.05265	0.04959
			853.736	0.02297	0.02758	0.03106	0.02532	0.03584	0.03323	0.03367	0.03982	0.04001	0.04624	0.0477	0.04621	0.05378	0.05141
			852.99	0.02258	0.02664	0.03077	0.02488	0.03587	0.03292	0.03316	0.04008	0.04071	0.04622	0.04664	0.04585	0.05289	0.04988
			852.244	0.0227	0.02647	0.03052	0.0256	0.03579	0.03265	0.03352	0.04049	0.0405	0.04619	0.04665	0.04572	0.05321	0.05008
			851.497	0.02245	0.02693	0.03094	0.02507	0.03602	0.03348	0.03349	0.04025	0.04085	0.04631	0.04675	0.04592	0.05413	0.05036
			850.751	0.0229	0.0272	0.03078	0.02521	0.03568	0.03349	0.03408	0.0401	0.04089	0.04665	0.04717	0.04618	0.05396	0.05093
			850.004	0.02289	0.02747	0.0308	0.02588	0.03602	0.03351	0.03405	0.0405	0.04128	0.04662	0.04771	0.04658	0.05426	0.05116
			849.256	0.0226	0.027	0.03041	0.02528	0.03617	0.03316	0.03385	0.0407	0.0406	0.046	0.0472	0.04597	0.05324	0.0503
			848.509	0.02262	0.02717	0.03128	0.02561	0.03602	0.03357	0.034	0.04076	0.04062	0.04653	0.04689	0.04657	0.05376	0.05119
			847.761	0.02278	0.02745	0.03104	0.02586	0.03639	0.03334	0.03462	0.04108	0.04052	0.04634	0.04758	0.04733	0.05422	0.05131
			847.013	0.0226	0.02729	0.03073	0.0258	0.03663	0.03312	0.0345	0.04078	0.04052	0.04609	0.04742	0.04679	0.05405	0.05094
			846.265	0.0227	0.02626	0.03087	0.02529	0.03631	0.03345	0.03427	0.04039	0.04103	0.0468	0.04698	0.04654	0.05377	0.051
			845.517	0.02266	0.02685	0.0308	0.02563	0.03591	0.03371	0.03397	0.04052	0.041	0.04629	0.0475	0.04705	0.05432	0.05129
			844.734	0.02323	0.02696	0.03117	0.02579	0.03652	0.03361	0.03424	0.04074	0.04121	0.04633	0.04774	0.04743	0.05423	0.05097
			843.985	0.02309	0.02744	0.03152	0.026	0.03695	0.03358	0.03447	0.04139	0.04123	0.04712	0.04777	0.047	0.05417	0.0515
			843.236	0.02279	0.02681	0.03134	0.0259	0.03596	0.03333	0.03449	0.04087	0.04082	0.04691	0.04731	0.04725	0.05433	0.05085
			842.486	0.02315	0.02751	0.03175	0.02622	0.03643	0.03414	0.03469	0.04126	0.04122	0.04701	0.04753	0.04747	0.05484	0.05178
			841.737	0.02332	0.02716	0.03168	0.02618	0.03646	0.03403	0.03448	0.04117	0.04152	0.04685	0.04791	0.04781	0.05475	0.05182
			840.987	0.02331	0.02727	0.03153	0.02605	0.03675	0.03398	0.03494	0.04154	0.04183	0.04741	0.04798	0.04719	0.05483	0.052
			840.236	0.02304	0.02755	0.0318	0.02576	0.03659	0.03362	0.03452	0.04089	0.04181	0.04758	0.04828	0.04811	0.05479	0.05135
			839.486	0.02296	0.02747	0.03211	0.02634	0.03691	0.03431	0.03477	0.04128	0.04189	0.04734	0.04836	0.04789	0.05543	0.05204
			838.735	0.02334	0.02732	0.03187	0.02612	0.03668	0.03393	0.03465	0.041	0.04134	0.04723	0.04813	0.04731	0.05443	0.05127
			837.984	0.02364	0.02742	0.03206	0.02639	0.03701	0.03435	0.03512	0.04137	0.04173	0.04773	0.04845	0.04826	0.05516	0.05231
			837.233	0.0234	0.02766	0.03236	0.0266	0.03691	0.03439	0.03506	0.04156	0.04211	0.04785	0.04854	0.04842	0.05553	0.05209
			836.516	0.02338	0.0275	0.03246	0.02641	0.0367	0.03438	0.03496	0.0421	0.04166	0.04785	0.04853	0.04822	0.05522	0.05195
			835.764	0.02361	0.02759	0.03208	0.02635	0.03704	0.03453	0.03519	0.04179	0.04188	0.04774	0.04827	0.04846	0.05502	0.05245
			835.012	0.02354	0.02782	0.0323	0.02655	0.03757	0.03453	0.03506	0.04175	0.04223	0.04761	0.04855	0.0485	0.05505	0.05258
			834.26	0.02377	0.02773	0.03259	0.02638	0.03775	0.03477	0.03537	0.04193	0.04225	0.04791	0.04892	0.04885	0.05542	0.05297
			833.508	0.02378	0.02778	0.03251	0.02659	0.03705	0.03453	0.03542	0.04173	0.04236	0.04777	0.0488	0.04862	0.05514	0.05266
			832.755	0.02328	0.02779	0.03262	0.02654	0.03732	0.03442	0.03548	0.04205	0.04243	0.0479	0.04867	0.0488	0.0555	0.0525
			832.002	0.02389	0.02787	0.03275	0.02676	0.03742	0.03515	0.03577	0.04216	0.04271	0.04874	0.04914	0.04917	0.05636	0.05305
			831.249	0.02367	0.02783	0.03303	0.02712	0.03755	0.03491	0.036	0.04223	0.04276	0.04863	0.04934	0.04917	0.05607	0.05317
			830.496	0.02383	0.02783	0.03316	0.02666	0.03735	0.03489	0.03578	0.04231	0.04267	0.04857	0.0493	0.04887	0.05605	0.0526
			829.742	0.02391	0.02793	0.03316	0.02701	0.03692	0.03491	0.03609	0.04265	0.04249	0.04877	0.04955	0.0491	0.05682	0.05267
			828.989	0.0238	0.02788	0.03205	0.02675	0.03737	0.03477	0.0355	0.04198	0.04233	0.04799	0.04898	0.04925	0.05587	0.05289
			828.235	0.02391	0.02813	0.0324	0.02684	0.03825	0.03522	0.03598	0.04252	0.0429	0.04877	0.04905	0.04951	0.05608	0.05335
			827.514	0.02392	0.02832	0.03302	0.02723	0.03787	0.03517	0.03606	0.04266	0.04302	0.04887	0.04958	0.04958	0.05697	0.05338
			826.76	0.02372	0.02806	0.03259	0.02716	0.03738	0.0351	0.03584	0.04254	0.04292	0.04879	0.04944	0.04933	0.05659	0.05315
			826.005	0.02419	0.02841	0.03344	0.02755	0.03785	0.03552	0.03658	0.04299	0.04314	0.04966	0.05001	0.04971	0.05724	0.0537
			825.25	0.02428	0.0286	0.03346	0.02747	0.03764	0.03561	0.03659	0.04332	0.04349	0.04961	0.05039	0.04992	0.05758	0.05341
			824.495	0.02421	0.0285	0.03247	0.0273	0.03794	0.0355	0.03645	0.04281	0.04327	0.04926	0.0498	0.04973	0.05693	0.05363
			823.739	0.02414	0.02852	0.03221	0.02712	0.0386	0.03542	0.03607	0.04242	0.04322	0.04843	0.04938	0.04981	0.05647	0.05377
			822.984	0.02443	0.02844	0.03237	0.0274	0.03852	0.03567	0.03636	0.04302	0.0434	0.04886	0.04969	0.05005	0.05674	0.0543
			822.262	0.02421	0.02856	0.03246	0.02748	0.03826	0.03568	0.03637	0.043	0.04337	0.04907	0.04999	0.05004	0.057	0.0535
			821.506	0.0245	0.0289	0.03304	0.02771	0.03826	0.03604	0.03657	0.04302	0.04388	0.0497	0.0502	0.05039	0.05758	0.05418
			820.749	0.02414	0.02896	0.03269	0.02762	0.03872	0.03568	0.03673	0.04316	0.0434	0.04953	0.05017	0.05039	0.0564	0.05417
			819.993	0.02426	0.02865	0.03308	0.02774	0.03881	0.03604	0.03678	0.0434	0.04386	0.05015	0.05004	0.05062	0.05719	0.05465
			819.236	0.02463	0.02877	0.03295	0.02789	0.03839	0.03598	0.03686	0.04285	0.04376	0.05001	0.05024	0.05054	0.05784	0.05387
			818.513	0.02476	0.02891	0.03337	0.02817	0.03897	0.03635	0.03714	0.04386	0.04424	0.05011	0.05062	0.05102	0.05785	0.05459
			817.756	0.02511	0.02934	0.03325	0.02817	0.03908	0.03617	0.03718	0.04411	0.04466	0.05029	0.05108	0.05081	0.05798	0.05477
			816.998	0.02447	0.02914	0.03297	0.02788	0.03882	0.03563	0.03713	0.04358	0.04425	0.05026	0.05084	0.05116	0.05788	0.05426
			816.24	0.02442	0.02865	0.03321	0.02754	0.03838	0.03596	0.03686	0.04329	0.04407	0.0502	0.05011	0.05049	0.05801	0.05453
			815.516	0.02481	0.02954	0.03331	0.02818	0.03862	0.03651	0.03783	0.04419	0.04477	0.05029	0.0512	0.05102	0.05864	0.05486
			814.758	0.02504	0.02911	0.03325	0.02801	0.03902	0.03673	0.03763	0.04426	0.04512	0.05115	0.05119	0.05126	0.059	0.05519
			814	0.02488	0.02913	0.03324	0.02812	0.03876	0.03678	0.0378	0.04445	0.04448	0.05053	0.05114	0.05132	0.05867	0.05499
			813.241	0.02485	0.02918	0.03306	0.02837	0.03876	0.03654	0.03743	0.04408	0.04447	0.05057	0.05062	0.05124	0.0582	0.05475
			812.516	0.02487	0.02918	0.03325	0.02816	0.0391	0.03712	0.03754	0.0444	0.04514	0.05062	0.05108	0.05098	0.0588	0.05538
			811.757	0.02492	0.02927	0.03305	0.02816	0.03915	0.03666	0.03768	0.04382	0.04462	0.05019	0.05085	0.05158	0.0582	0.05462
			810.997	0.02527	0.0301	0.03385	0.02878	0.03953	0.0373	0.03773	0.04466	0.04542	0.05115	0.05189	0.05202	0.05957	0.05569
			810.238	0.0253	0.02953	0.03378	0.02864	0.03911	0.03689	0.03847	0.04514	0.04527	0.05089	0.0519	0.05182	0.05909	0.05501
			809.512	0.02521	0.0297	0.0338	0.02856	0.03967	0.03723	0.03832	0.04478	0.04572	0.05108	0.05224	0.052	0.05938	0.05557
			808.752	0.0257	0.02946	0.03366	0.02895	0.03974	0.03701	0.03818	0.04519	0.04516	0.05134	0.05192	0.05222	0.05862	0.05541
			807.992	0.0249	0.0294	0.0336	0.02862	0.03919	0.03674	0.03774	0.04414	0.04488	0.05089	0.05145	0.05148	0.05905	0.05566
			807.265	0.02515	0.02937	0.03387	0.02871	0.03931	0.03703	0.03803	0.0448	0.04557	0.0512	0.0519	0.05202	0.05947	0.05549
			806.505	0.0253	0.02953	0.03407	0.02876	0.0398	0.03734	0.03823	0.04483	0.0458	0.05127	0.05137	0.05241	0.0594	0.05628
			805.743	0.02579	0.03003	0.03368	0.02866	0.03962	0.03777	0.03869	0.04536	0.04547	0.05168	0.05238	0.05237	0.05992	0.05629
			805.017	0.02561	0.02972	0.03389	0.02906	0.03991	0.03755	0.03867	0.04538	0.04604	0.05177	0.0524	0.05206	0.05961	0.05641
			804.255	0.02549	0.02992	0.03394	0.029	0.04026	0.03784	0.0387	0.04521	0.04615	0.05176	0.05224	0.05261	0.05987	0.05631
			803.493	0.02598	0.03029	0.03426	0.02927	0.04056	0.03797	0.03903	0.04574	0.04651	0.05184	0.05312	0.05285	0.05992	0.05677
			802.766	0.02563	0.02993	0.03404	0.02888	0.03954	0.03791	0.03878	0.0455	0.0459	0.0519	0.05243	0.05291	0.06002	0.05706
			802.004	0.02628	0.03029	0.03448	0.02933	0.04038	0.0384	0.0391	0.0459	0.04646	0.05272	0.05308	0.05287	0.06089	0.05712
			801.241	0.02555	0.02994	0.03383	0.02876	0.04014	0.03781	0.03879	0.04578	0.0461	0.0519	0.05252	0.05231	0.05941	0.05618
			800.513	0.0259	0.03019	0.03423	0.02922	0.04049	0.03834	0.03882	0.04591	0.04649	0.05242	0.05299	0.05239	0.06012	0.05711
			799.75	0.02625	0.03031	0.03427	0.02977	0.04061	0.03815	0.03926	0.0464	0.04677	0.05271	0.05342	0.05315	0.06071	0.0567
			798.987	0.02564	0.03027	0.03443	0.02935	0.04078	0.03824	0.03936	0.04598	0.04641	0.05259	0.053	0.05255	0.06054	0.05685
			798.258	0.02583	0.03041	0.03445	0.02942	0.04044	0.0381	0.03941	0.0459	0.04674	0.05232	0.05297	0.05312	0.06062	0.05658
			797.494	0.0259	0.03022	0.03447	0.02949	0.0405	0.03793	0.03946	0.04584	0.04648	0.05246	0.05276	0.05317	0.0606	0.05731
			796.765	0.02598	0.03004	0.03447	0.02981	0.04048	0.03856	0.03977	0.04629	0.04666	0.05246	0.05285	0.05296	0.06061	0.0573
			796.001	0.02635	0.03072	0.03455	0.03001	0.04123	0.03875	0.04027	0.04662	0.047	0.05301	0.0538	0.05413	0.06098	0.05764
			795.237	0.02611	0.03065	0.03455	0.02988	0.04073	0.03888	0.03985	0.04662	0.04692	0.05272	0.05309	0.05321	0.06106	0.05727
			794.507	0.02644	0.03109	0.03457	0.02991	0.04135	0.03922	0.04001	0.04648	0.04758	0.05317	0.05396	0.05377	0.06144	0.05784
			793.742	0.02703	0.03096	0.03482	0.03032	0.04163	0.03909	0.04032	0.04711	0.04788	0.05351	0.0538	0.05445	0.06183	0.05776
			793.012	0.02708	0.03119	0.03518	0.0304	0.04154	0.03901	0.04077	0.04738	0.0478	0.05364	0.05449	0.05407	0.06197	0.05806
			792.247	0.02648	0.03092	0.03493	0.03011	0.04121	0.03889	0.04015	0.0471	0.04724	0.05308	0.05365	0.05402	0.06132	0.05811
			791.516	0.02648	0.0308	0.03516	0.03016	0.04144	0.03914	0.04038	0.04719	0.04802	0.05338	0.05404	0.05432	0.06184	0.05798
			790.75	0.02656	0.03103	0.0348	0.03007	0.04126	0.03904	0.04025	0.04705	0.04787	0.05344	0.05413	0.05416	0.06181	0.05831
			789.984	0.02681	0.03147	0.03533	0.03027	0.042	0.03936	0.04076	0.04747	0.04823	0.05382	0.05434	0.05448	0.06203	0.058
			789.253	0.02681	0.03112	0.03548	0.03029	0.0417	0.03928	0.04037	0.04749	0.04799	0.05373	0.05455	0.05421	0.06195	0.05832
			788.487	0.02707	0.03124	0.03543	0.03049	0.04151	0.03932	0.04108	0.04745	0.04811	0.05377	0.05452	0.0545	0.06239	0.05867
			787.755	0.02648	0.03098	0.03516	0.03024	0.04158	0.03935	0.04071	0.04714	0.0484	0.05393	0.05427	0.05407	0.06191	0.05806
			786.988	0.02717	0.03176	0.03532	0.03052	0.04184	0.0396	0.04088	0.04767	0.04842	0.05434	0.05454	0.05474	0.06238	0.05896
			786.256	0.02655	0.03126	0.03507	0.03031	0.0415	0.0395	0.04049	0.04684	0.04794	0.05392	0.0544	0.05449	0.06212	0.05878
			785.489	0.0275	0.03146	0.03561	0.031	0.04193	0.04011	0.04121	0.04835	0.04854	0.05432	0.05516	0.05511	0.06242	0.05896
			784.756	0.02701	0.0316	0.03538	0.03102	0.04172	0.03954	0.04124	0.04784	0.04827	0.05431	0.05505	0.05526	0.06247	0.05899
			783.988	0.02688	0.03124	0.03515	0.03066	0.04219	0.03982	0.04109	0.04784	0.04828	0.05434	0.05472	0.05519	0.06245	0.05889
			783.255	0.02713	0.03183	0.0361	0.03096	0.04237	0.04027	0.04146	0.04812	0.04892	0.05456	0.0548	0.05454	0.06255	0.05928
			782.487	0.02704	0.0317	0.03579	0.03108	0.04207	0.04053	0.04126	0.04814	0.04881	0.05496	0.05502	0.05512	0.06277	0.05977
			781.753	0.02739	0.03155	0.03566	0.03078	0.04186	0.0398	0.04109	0.04818	0.04901	0.05497	0.05537	0.05495	0.06239	0.05956
			780.985	0.02729	0.03153	0.0357	0.03118	0.04237	0.04034	0.04175	0.04784	0.04913	0.05488	0.05548	0.05483	0.06291	0.05978
			780.251	0.02769	0.03184	0.03605	0.03158	0.04221	0.04065	0.04202	0.0488	0.04918	0.05559	0.0559	0.05539	0.06304	0.05936
			779.517	0.02768	0.0323	0.03618	0.03145	0.04262	0.04032	0.04168	0.04859	0.04916	0.0549	0.05562	0.05598	0.06334	0.05982
			778.748	0.02759	0.03224	0.03603	0.03179	0.0427	0.04083	0.04185	0.04901	0.04947	0.05535	0.05574	0.05577	0.06349	0.06021
			778.013	0.02762	0.0323	0.0362	0.03172	0.0432	0.04086	0.04189	0.0488	0.04935	0.0555	0.05632	0.05565	0.06354	0.06047
			777.243	0.02785	0.03211	0.03615	0.03116	0.04278	0.04064	0.0421	0.04884	0.04938	0.0555	0.05587	0.05588	0.06366	0.06037
			776.508	0.02824	0.03257	0.03609	0.03196	0.0433	0.04112	0.04289	0.04898	0.04982	0.05577	0.05621	0.05616	0.06395	0.06111
			775.738	0.02823	0.03266	0.03666	0.03212	0.04312	0.04145	0.04269	0.04914	0.05004	0.05604	0.05648	0.05664	0.06418	0.06088
			775.003	0.0278	0.03234	0.03575	0.03167	0.04302	0.04085	0.0424	0.04884	0.04962	0.05535	0.0559	0.05573	0.06329	0.06059
			774.267	0.0281	0.03239	0.03631	0.03168	0.04288	0.04108	0.04228	0.04914	0.04965	0.05591	0.05638	0.05596	0.06393	0.06073
			773.497	0.02797	0.03268	0.03625	0.03158	0.04337	0.04128	0.04272	0.04935	0.05031	0.0559	0.05648	0.05576	0.06378	0.06074
			772.761	0.02846	0.03291	0.03701	0.03259	0.04368	0.04178	0.04339	0.05018	0.05049	0.05653	0.05729	0.05676	0.06481	0.06145
			771.989	0.02795	0.03225	0.03645	0.03188	0.04327	0.04097	0.04261	0.04931	0.04971	0.05614	0.05644	0.05636	0.0634	0.06077
			771.253	0.02825	0.033	0.0371	0.03208	0.0438	0.04161	0.04295	0.04979	0.05062	0.05665	0.05696	0.05718	0.06436	0.06149
			770.516	0.02817	0.03293	0.03689	0.0322	0.04365	0.04177	0.04302	0.04993	0.05033	0.05649	0.05712	0.05697	0.06436	0.06146
			769.744	0.02833	0.03292	0.03697	0.03231	0.04349	0.04185	0.04312	0.05002	0.05052	0.05664	0.05699	0.05662	0.06454	0.06128
			769.007	0.02844	0.03307	0.03697	0.03264	0.04397	0.04228	0.04328	0.05019	0.05084	0.05678	0.0575	0.05728	0.06492	0.06135
			768.235	0.02851	0.03319	0.03719	0.03254	0.04376	0.0423	0.04334	0.05042	0.05083	0.05671	0.0572	0.05702	0.06503	0.06197
			767.497	0.02883	0.03327	0.03718	0.03276	0.04421	0.04269	0.04371	0.05062	0.05094	0.05729	0.05774	0.05733	0.06535	0.06168
			766.76	0.02853	0.03313	0.03718	0.03249	0.04399	0.04203	0.04349	0.04999	0.05087	0.05692	0.05756	0.05707	0.06497	0.06148
			765.987	0.02863	0.03326	0.03745	0.03286	0.04425	0.04236	0.04363	0.05076	0.05123	0.05753	0.05802	0.05725	0.0657	0.06224
			765.249	0.02867	0.03308	0.0371	0.03274	0.04389	0.04212	0.04336	0.05052	0.05106	0.05683	0.05763	0.05745	0.06512	0.06217
			764.51	0.02887	0.0336	0.03754	0.03296	0.04453	0.04248	0.0439	0.05081	0.05138	0.05749	0.05765	0.05767	0.06541	0.06258
			763.737	0.02895	0.03351	0.03727	0.03288	0.04448	0.04252	0.044	0.05069	0.05123	0.05733	0.05818	0.05766	0.06516	0.06265
			762.998	0.02896	0.03378	0.03757	0.03319	0.04457	0.04261	0.04405	0.0509	0.0516	0.05788	0.05796	0.05753	0.06565	0.0624
			762.259	0.02905	0.0332	0.03758	0.03313	0.0446	0.04286	0.04386	0.05096	0.05145	0.05753	0.05822	0.05785	0.06556	0.06254
			761.485	0.0293	0.03402	0.03804	0.03364	0.04491	0.04316	0.04478	0.05141	0.052	0.05838	0.05855	0.0583	0.06616	0.06286
			760.746	0.02928	0.03357	0.03804	0.0331	0.04491	0.04271	0.04432	0.05108	0.05183	0.05807	0.05864	0.05784	0.06591	0.06308
			760.006	0.02938	0.03376	0.03768	0.03316	0.04476	0.04312	0.04435	0.05119	0.05164	0.05818	0.05836	0.05801	0.06582	0.06295
			759.266	0.0295	0.03405	0.03797	0.03342	0.04495	0.04331	0.04456	0.05145	0.05195	0.05865	0.05868	0.05837	0.06607	0.0628
			758.491	0.02926	0.03377	0.03816	0.03335	0.04498	0.04313	0.04465	0.05141	0.05221	0.05808	0.05883	0.05835	0.06615	0.06305
			757.751	0.02984	0.03417	0.03823	0.03392	0.04544	0.04372	0.04504	0.05186	0.05261	0.05869	0.05882	0.05858	0.06665	0.06366
			757.011	0.02969	0.03413	0.03841	0.03399	0.04523	0.0435	0.04501	0.0519	0.05246	0.05864	0.05929	0.05838	0.06606	0.06351
			756.235	0.02959	0.03423	0.03802	0.03366	0.04528	0.04373	0.04515	0.05197	0.05265	0.05897	0.05922	0.05865	0.06658	0.06359
			755.494	0.02943	0.03385	0.03831	0.0336	0.04532	0.04369	0.04495	0.05169	0.05227	0.05853	0.05894	0.05831	0.06654	0.06334
			754.753	0.02952	0.03444	0.03853	0.03395	0.04544	0.04359	0.04538	0.0523	0.05246	0.05921	0.05947	0.05896	0.06675	0.06356
			754.012	0.02999	0.03454	0.03873	0.03405	0.04562	0.04406	0.04556	0.0524	0.05279	0.05893	0.05959	0.05903	0.06695	0.06367
			753.236	0.02989	0.03447	0.03868	0.03406	0.04583	0.04404	0.04532	0.05249	0.05283	0.05941	0.05959	0.05904	0.06694	0.06415
			752.494	0.0299	0.03457	0.03896	0.03435	0.04583	0.04421	0.04543	0.05265	0.05293	0.05933	0.05994	0.05901	0.06718	0.0642
			751.752	0.02977	0.03445	0.03869	0.0343	0.04568	0.04428	0.04553	0.05248	0.05304	0.05928	0.05993	0.05921	0.06675	0.06397
			751.01	0.02994	0.03451	0.03887	0.03448	0.0459	0.04458	0.046	0.05272	0.05304	0.0593	0.06013	0.05955	0.06749	0.06405
			750.233	0.03015	0.03472	0.03902	0.03441	0.04614	0.04429	0.04583	0.05291	0.05328	0.05978	0.06006	0.0595	0.0677	0.06406
			749.491	0.03041	0.03477	0.03911	0.03449	0.04616	0.04459	0.04579	0.05298	0.05367	0.05974	0.05997	0.05974	0.06715	0.06418
			748.748	0.03015	0.03474	0.03886	0.03473	0.04617	0.04453	0.04608	0.05288	0.0535	0.05972	0.05991	0.05958	0.0673	0.06402
			748.005	0.03021	0.03473	0.03904	0.0348	0.0462	0.04463	0.04585	0.05291	0.05349	0.0597	0.06013	0.05972	0.06742	0.06462
			747.262	0.03043	0.03515	0.03942	0.03518	0.04641	0.04475	0.0463	0.05358	0.05398	0.0604	0.0606	0.06014	0.06793	0.06453
			746.484	0.03046	0.03503	0.03953	0.03497	0.0468	0.04519	0.04668	0.05372	0.05411	0.06053	0.06053	0.06019	0.06803	0.0647
			745.74	0.03094	0.03543	0.03969	0.03522	0.04678	0.04542	0.04657	0.05356	0.05422	0.06069	0.06108	0.0602	0.06823	0.06516
			744.997	0.03057	0.03534	0.03969	0.03497	0.04681	0.04529	0.0467	0.05363	0.05422	0.06065	0.06084	0.06031	0.068	0.06518
			744.253	0.03035	0.03547	0.03965	0.03519	0.0468	0.04543	0.04685	0.05359	0.0541	0.06055	0.06103	0.06034	0.06821	0.065
			743.509	0.03091	0.03554	0.03969	0.03526	0.04712	0.04552	0.04711	0.0539	0.05452	0.06081	0.06091	0.06047	0.06872	0.06549
			742.765	0.031	0.03579	0.03975	0.03568	0.04733	0.04591	0.04752	0.05425	0.05482	0.06128	0.06127	0.06108	0.06856	0.06564
			741.985	0.03111	0.03558	0.0399	0.0356	0.04718	0.04598	0.0469	0.05409	0.05478	0.06113	0.06142	0.061	0.06863	0.06561
			741.241	0.03109	0.03578	0.03987	0.03573	0.04719	0.04587	0.04714	0.05444	0.05532	0.06111	0.06158	0.06116	0.069	0.06541
			740.496	0.03122	0.0359	0.04013	0.03562	0.04737	0.04631	0.04738	0.05451	0.05518	0.0615	0.06159	0.06108	0.06902	0.06572
			739.751	0.03155	0.03614	0.04025	0.03617	0.0476	0.04635	0.04763	0.05468	0.05529	0.06161	0.06191	0.06133	0.06911	0.06593
			739.006	0.03123	0.03582	0.04031	0.03598	0.04777	0.04616	0.04742	0.0547	0.05571	0.06169	0.062	0.06138	0.06952	0.06602
			738.26	0.03134	0.03605	0.04022	0.03605	0.04793	0.04636	0.04782	0.05486	0.05548	0.06175	0.06196	0.06169	0.06939	0.06614
			737.515	0.03131	0.03601	0.0402	0.03587	0.04799	0.04653	0.04759	0.05476	0.05569	0.06189	0.06176	0.06151	0.0693	0.06615
			736.734	0.03162	0.03635	0.04057	0.03631	0.04804	0.04658	0.04811	0.05564	0.05579	0.06225	0.06237	0.06195	0.06978	0.06645
			735.988	0.03178	0.03639	0.04056	0.03644	0.04801	0.04679	0.04827	0.05539	0.05602	0.06226	0.0625	0.06192	0.06986	0.06642
			735.242	0.03156	0.03628	0.04064	0.03627	0.04797	0.04663	0.04795	0.05519	0.0561	0.06203	0.06251	0.06195	0.06943	0.06633
			734.495	0.03175	0.03642	0.0408	0.03636	0.04818	0.047	0.04839	0.05543	0.05625	0.06229	0.06275	0.06189	0.06975	0.06655
			733.749	0.03194	0.03662	0.04091	0.03656	0.04833	0.04715	0.0486	0.05555	0.0566	0.06263	0.06287	0.06227	0.07021	0.06688
			733.002	0.03178	0.03652	0.04069	0.03658	0.04842	0.04708	0.04848	0.05552	0.05646	0.06256	0.06284	0.0621	0.06999	0.06671
			732.255	0.03193	0.03666	0.04106	0.03673	0.04867	0.04735	0.04865	0.05583	0.05691	0.06257	0.06314	0.06251	0.07028	0.06705
			731.508	0.03204	0.03663	0.04106	0.03674	0.04897	0.04728	0.04876	0.05589	0.05692	0.06288	0.06304	0.06269	0.07044	0.06722
			730.761	0.03237	0.0369	0.04131	0.0372	0.04896	0.04765	0.049	0.05621	0.0569	0.06309	0.06339	0.06267	0.07038	0.06714
			730.013	0.03236	0.0371	0.04137	0.03705	0.0491	0.04782	0.04913	0.05634	0.05725	0.06333	0.06356	0.06313	0.07073	0.06766
			729.266	0.03211	0.03684	0.04119	0.03698	0.04905	0.04764	0.04908	0.05608	0.05703	0.0632	0.06342	0.06274	0.07053	0.06735
			728.518	0.03229	0.03725	0.04147	0.03726	0.04925	0.04798	0.04921	0.0563	0.05736	0.06323	0.06332	0.06299	0.07081	0.06774
			727.734	0.03231	0.03701	0.04112	0.0372	0.04919	0.04801	0.04935	0.05617	0.05732	0.06334	0.06364	0.06309	0.07081	0.06761
			726.986	0.03247	0.03737	0.04159	0.03744	0.04961	0.04805	0.04955	0.05677	0.0576	0.06364	0.06397	0.06365	0.07096	0.06801
			726.237	0.03252	0.03727	0.04166	0.03742	0.04937	0.04837	0.04956	0.05654	0.05771	0.06374	0.06386	0.06342	0.07104	0.06807
			725.489	0.03261	0.03717	0.04172	0.03733	0.04953	0.04811	0.04967	0.0566	0.05764	0.06377	0.0639	0.06345	0.07118	0.06784
			724.74	0.03283	0.03752	0.04201	0.03768	0.04968	0.04853	0.04997	0.05705	0.05787	0.06408	0.06422	0.0636	0.07135	0.06827
			723.991	0.03291	0.03747	0.04209	0.03764	0.04989	0.04841	0.04969	0.05711	0.05804	0.06414	0.06422	0.06385	0.07167	0.06839
			723.242	0.03302	0.03784	0.04218	0.03783	0.04997	0.04872	0.0501	0.05725	0.0583	0.06427	0.06452	0.06388	0.07155	0.06864
			722.492	0.03303	0.03774	0.0424	0.03803	0.05003	0.04885	0.05049	0.05755	0.05855	0.06456	0.06465	0.06422	0.07185	0.06874
			721.742	0.03295	0.03787	0.04235	0.03803	0.05021	0.04903	0.05051	0.05772	0.05853	0.0646	0.06471	0.0643	0.07206	0.0687
			720.993	0.03314	0.03806	0.04255	0.03818	0.05041	0.04922	0.05057	0.05774	0.05891	0.06459	0.06478	0.06455	0.07227	0.06923
			720.243	0.03331	0.03808	0.0427	0.03841	0.05044	0.04928	0.05062	0.058	0.05879	0.06489	0.06509	0.06463	0.07226	0.06911
			719.492	0.03364	0.03831	0.04298	0.03856	0.05067	0.04968	0.05104	0.05822	0.05913	0.06523	0.06553	0.06491	0.07257	0.06967
			718.742	0.03368	0.03842	0.04312	0.03858	0.05087	0.04983	0.05114	0.05812	0.05925	0.06533	0.06565	0.06517	0.07271	0.06953
			717.992	0.03348	0.03828	0.04297	0.03854	0.05057	0.04955	0.05088	0.05817	0.05908	0.06532	0.06534	0.06484	0.0726	0.06945
			717.241	0.0338	0.0385	0.04311	0.0389	0.05076	0.04993	0.05127	0.05849	0.0595	0.06553	0.06558	0.06509	0.07303	0.06937
			716.49	0.03364	0.03857	0.04315	0.03888	0.05109	0.05009	0.05135	0.05854	0.0596	0.06559	0.0657	0.06519	0.07281	0.06969
			715.739	0.03394	0.03882	0.04324	0.03914	0.05125	0.05027	0.05156	0.05879	0.05986	0.06574	0.06594	0.06551	0.07306	0.07011
			714.987	0.03392	0.03872	0.04329	0.03911	0.05139	0.05046	0.05155	0.05879	0.0599	0.0658	0.06604	0.06562	0.07315	0.07014
			714.236	0.03395	0.03879	0.04333	0.0391	0.05151	0.05033	0.05176	0.05877	0.06006	0.066	0.06603	0.06571	0.07314	0.07029
			713.484	0.03422	0.0388	0.04325	0.03909	0.0514	0.05046	0.05177	0.05894	0.06011	0.06603	0.0661	0.0655	0.07328	0.06995
			712.732	0.03417	0.03883	0.04354	0.03926	0.05162	0.05053	0.05188	0.05912	0.06019	0.06628	0.06621	0.0659	0.07351	0.07043
			712.016	0.03422	0.03895	0.04345	0.03939	0.05174	0.05068	0.05185	0.05922	0.0604	0.0662	0.06648	0.06618	0.07346	0.07057
			711.264	0.03433	0.03918	0.04363	0.03948	0.05174	0.05079	0.05213	0.05933	0.06044	0.06634	0.06654	0.06628	0.0737	0.07064
			710.511	0.03472	0.03941	0.04389	0.03962	0.05208	0.0509	0.05239	0.05969	0.06071	0.06671	0.06687	0.0665	0.07398	0.07097
			709.759	0.03445	0.03928	0.04398	0.03969	0.05211	0.05105	0.05248	0.05969	0.06063	0.06663	0.06697	0.06644	0.07415	0.07101
			709.006	0.03479	0.03968	0.0443	0.03999	0.0523	0.0515	0.05269	0.06013	0.06098	0.0671	0.06723	0.06669	0.0743	0.07133
			708.253	0.03483	0.03966	0.04405	0.04008	0.05257	0.05138	0.05283	0.06001	0.06122	0.06706	0.06716	0.06674	0.07452	0.0714
			707.5	0.03501	0.03964	0.04413	0.04006	0.05246	0.05153	0.05282	0.06034	0.06137	0.06704	0.06724	0.06696	0.07432	0.07151
			706.746	0.03484	0.03971	0.04412	0.04011	0.0527	0.05147	0.05312	0.06022	0.06123	0.06726	0.06742	0.06721	0.07436	0.07149
			705.992	0.03492	0.03983	0.04449	0.04022	0.05285	0.05198	0.05308	0.06064	0.06133	0.06744	0.06749	0.06729	0.07477	0.07143
			705.239	0.03515	0.03984	0.04457	0.04021	0.05288	0.05183	0.05319	0.06065	0.06175	0.06749	0.06782	0.06717	0.07475	0.07165
			704.485	0.03524	0.03995	0.0449	0.04064	0.05321	0.05218	0.05347	0.06084	0.06183	0.06788	0.06802	0.0676	0.07511	0.07205
			703.767	0.03542	0.04031	0.04471	0.04079	0.05345	0.05222	0.0538	0.06113	0.06194	0.06781	0.06805	0.06785	0.07525	0.07225
			703.012	0.03535	0.0402	0.04476	0.04081	0.0532	0.05233	0.05348	0.06098	0.06191	0.06795	0.06811	0.06794	0.07514	0.0721
			702.258	0.03572	0.04047	0.04524	0.04087	0.05358	0.05254	0.054	0.06136	0.06222	0.06849	0.06851	0.06801	0.07536	0.07234
			701.503	0.03547	0.04025	0.04499	0.04084	0.05361	0.05256	0.05411	0.06134	0.06222	0.06815	0.06856	0.06806	0.07543	0.07238
			700.748	0.03568	0.04054	0.04518	0.04109	0.05351	0.05277	0.05421	0.06158	0.06237	0.06847	0.06871	0.06812	0.07557	0.07247
			699.993	0.03577	0.04066	0.04527	0.04118	0.05357	0.05283	0.05417	0.06161	0.06259	0.06854	0.06878	0.06834	0.07583	0.07274
			699.238	0.03582	0.04078	0.04503	0.04132	0.0538	0.05293	0.05434	0.06176	0.06283	0.06847	0.06879	0.06859	0.07581	0.07296
			698.482	0.03595	0.04101	0.04503	0.04131	0.05436	0.05322	0.05454	0.06177	0.06285	0.06861	0.06892	0.06862	0.07573	0.07339
			697.763	0.03601	0.04093	0.04537	0.04149	0.0545	0.05348	0.05484	0.06204	0.06317	0.06887	0.06904	0.06887	0.07591	0.07345
			697.007	0.03629	0.04118	0.04541	0.04172	0.05447	0.05356	0.05496	0.06235	0.06343	0.06901	0.06929	0.06895	0.07619	0.07356
			696.251	0.03626	0.04111	0.04564	0.04169	0.05453	0.05348	0.05493	0.06229	0.06325	0.06929	0.0695	0.06906	0.07639	0.07365
			695.495	0.03631	0.04126	0.04558	0.04182	0.05448	0.0536	0.055	0.06239	0.06338	0.06928	0.0695	0.06913	0.0764	0.07367
			694.738	0.03662	0.04142	0.04591	0.04204	0.05491	0.05406	0.05548	0.0627	0.06351	0.06962	0.06966	0.06946	0.0768	0.07381
			694.018	0.03662	0.04145	0.04598	0.04217	0.05492	0.0541	0.05549	0.06286	0.064	0.06984	0.06986	0.06956	0.07694	0.07398
			693.261	0.03661	0.04166	0.04622	0.04249	0.05515	0.05439	0.05567	0.06308	0.06413	0.06983	0.07023	0.0698	0.07718	0.07427
			692.504	0.03673	0.04176	0.04623	0.0423	0.05494	0.05445	0.0557	0.06309	0.06421	0.07	0.07021	0.06989	0.0774	0.07433
			691.747	0.03698	0.04188	0.04626	0.04246	0.05524	0.05439	0.05609	0.06341	0.06424	0.07011	0.07038	0.07009	0.07736	0.07453
			690.99	0.03697	0.04197	0.04649	0.04265	0.05519	0.0546	0.05625	0.0635	0.06427	0.07033	0.07005	0.07026	0.07749	0.07457
			690.232	0.03734	0.04213	0.04655	0.04287	0.05577	0.05506	0.0563	0.06384	0.06463	0.07047	0.07068	0.07056	0.07748	0.07487
			689.511	0.03731	0.04211	0.04643	0.04292	0.05563	0.05487	0.05629	0.06401	0.06456	0.07056	0.07078	0.07052	0.07775	0.07494
			688.753	0.03733	0.04231	0.04672	0.04304	0.05571	0.05492	0.05655	0.06388	0.06474	0.07056	0.07094	0.07068	0.07799	0.07492
			687.995	0.03755	0.04237	0.04705	0.04318	0.05581	0.05517	0.0568	0.06384	0.06502	0.07087	0.07114	0.07104	0.07809	0.07523
			687.237	0.03754	0.04243	0.04678	0.0431	0.056	0.05545	0.05669	0.0641	0.065	0.07127	0.0713	0.07088	0.0781	0.07549
			686.515	0.03772	0.0427	0.04711	0.04348	0.05633	0.05565	0.05718	0.06453	0.06552	0.0714	0.07138	0.07119	0.07863	0.07565
			685.756	0.0378	0.04284	0.04737	0.04358	0.0564	0.05575	0.05723	0.06474	0.06568	0.07141	0.07187	0.07161	0.07913	0.07578
			684.997	0.03771	0.04281	0.04725	0.04347	0.05668	0.05549	0.05721	0.06471	0.06577	0.07159	0.07166	0.07136	0.07888	0.07585
			684.239	0.03823	0.04309	0.04748	0.04383	0.05656	0.05605	0.05768	0.06516	0.0659	0.07169	0.07198	0.07159	0.07887	0.0763
			683.516	0.03795	0.04294	0.04729	0.04398	0.05648	0.05593	0.0575	0.06486	0.06557	0.07167	0.07206	0.07156	0.07896	0.0759
			682.756	0.03807	0.04305	0.04756	0.04408	0.05669	0.05605	0.05769	0.06497	0.06596	0.07192	0.07204	0.07162	0.07916	0.07626
			681.997	0.03825	0.04326	0.04777	0.04407	0.05701	0.05634	0.05785	0.06541	0.06607	0.07221	0.07238	0.0718	0.07944	0.07622
			681.237	0.03834	0.04352	0.04788	0.0443	0.057	0.05665	0.05815	0.06577	0.06648	0.07233	0.0724	0.07232	0.07953	0.07659
			680.514	0.03863	0.04338	0.04786	0.04442	0.05722	0.05668	0.05818	0.0657	0.06637	0.07237	0.07267	0.0723	0.07956	0.07688
			679.754	0.03858	0.04352	0.04788	0.04447	0.05733	0.05681	0.05859	0.06569	0.06672	0.07246	0.07256	0.07223	0.07958	0.07726
			678.994	0.03851	0.04362	0.04796	0.0444	0.05754	0.05694	0.05824	0.06593	0.06689	0.07234	0.07264	0.07233	0.07973	0.07717
			678.233	0.03864	0.04381	0.04825	0.04469	0.05773	0.05716	0.05858	0.06613	0.06691	0.07273	0.07291	0.07288	0.07992	0.07732
			677.509	0.03903	0.044	0.04852	0.04501	0.05798	0.05737	0.05893	0.06638	0.06736	0.07313	0.07326	0.07306	0.0802	0.0777
			676.748	0.03917	0.0443	0.04861	0.04505	0.05809	0.05739	0.05918	0.0667	0.0673	0.07331	0.07335	0.0731	0.08035	0.07753
			675.987	0.03931	0.04418	0.04871	0.04518	0.05797	0.05761	0.05911	0.06702	0.06748	0.07332	0.07339	0.07318	0.08045	0.0778
			675.263	0.03904	0.04414	0.04877	0.04519	0.05836	0.05755	0.05933	0.06662	0.06742	0.07367	0.07341	0.07339	0.08055	0.07782
			674.501	0.0394	0.04431	0.04888	0.04547	0.05842	0.05797	0.05944	0.06685	0.06774	0.07355	0.07383	0.0733	0.08093	0.07784
			673.74	0.03958	0.04449	0.04888	0.04556	0.05855	0.05816	0.05969	0.06703	0.06796	0.07394	0.07419	0.07361	0.08101	0.07799
			673.015	0.03971	0.04463	0.04909	0.04587	0.05899	0.05816	0.05987	0.06746	0.06811	0.07408	0.0743	0.07371	0.08129	0.07848
			672.253	0.03957	0.04486	0.04944	0.04565	0.05885	0.0584	0.05977	0.06739	0.06822	0.0742	0.07429	0.07402	0.08158	0.07871
			671.491	0.03975	0.04486	0.04945	0.04613	0.05904	0.05856	0.06045	0.06778	0.06847	0.07453	0.07451	0.07428	0.0817	0.07876
			670.765	0.04003	0.04506	0.04979	0.04628	0.05912	0.05885	0.06057	0.0681	0.06887	0.07477	0.07477	0.07447	0.08183	0.07894
			670.003	0.04	0.04504	0.04956	0.04627	0.05929	0.05893	0.06044	0.06808	0.06872	0.07456	0.07453	0.07453	0.08174	0.07891
			669.241	0.03998	0.04506	0.04959	0.04627	0.05922	0.05893	0.06042	0.06788	0.0688	0.07471	0.07498	0.07451	0.08189	0.07882
			668.514	0.04023	0.04547	0.04994	0.04645	0.05951	0.05913	0.06067	0.06816	0.06901	0.07491	0.07491	0.07475	0.08225	0.07922
			667.752	0.04032	0.04571	0.05018	0.04666	0.05998	0.05923	0.06092	0.06861	0.06945	0.0752	0.07534	0.07519	0.08249	0.07938
			666.989	0.04029	0.04554	0.05018	0.0469	0.05985	0.05952	0.06117	0.06884	0.06952	0.07535	0.07563	0.07531	0.0823	0.07952
			666.262	0.04052	0.04538	0.05028	0.04669	0.05985	0.05958	0.06129	0.06859	0.06969	0.07544	0.07534	0.07516	0.08224	0.07952
			665.499	0.04087	0.04589	0.05055	0.04715	0.06033	0.05997	0.06165	0.06896	0.06987	0.07582	0.07577	0.07563	0.08259	0.08007
			664.735	0.041	0.0461	0.05055	0.04703	0.0605	0.05986	0.06147	0.06927	0.07	0.07615	0.07603	0.07583	0.08303	0.08025
			664.008	0.04076	0.04599	0.05053	0.04728	0.06023	0.05986	0.06171	0.06924	0.06981	0.0758	0.07562	0.07534	0.08294	0.07992
			663.244	0.04126	0.04617	0.0508	0.04746	0.06066	0.06041	0.06186	0.06939	0.07048	0.07628	0.07638	0.07592	0.08344	0.08028
			662.516	0.04132	0.04663	0.05126	0.04765	0.06068	0.0606	0.06214	0.06969	0.07047	0.07641	0.07645	0.07651	0.08348	0.08045
			661.752	0.04136	0.04652	0.05119	0.04766	0.06078	0.06057	0.06213	0.06977	0.07068	0.07648	0.07642	0.07633	0.08346	0.08051
			660.988	0.04162	0.04675	0.05161	0.04816	0.06132	0.06089	0.06279	0.07026	0.071	0.07718	0.07702	0.07657	0.08403	0.08068
			660.26	0.04162	0.04692	0.05154	0.04804	0.06116	0.06094	0.06257	0.07022	0.07109	0.07683	0.07677	0.07653	0.08414	0.081
			659.495	0.04153	0.04673	0.05147	0.04807	0.06133	0.06101	0.06268	0.07017	0.07113	0.07706	0.07706	0.07659	0.08399	0.08102
			658.767	0.04163	0.04707	0.05146	0.04833	0.06178	0.06117	0.06286	0.07024	0.07131	0.07696	0.07693	0.07702	0.08403	0.08122
			658.002	0.04202	0.04713	0.05177	0.04841	0.06186	0.06134	0.06291	0.0705	0.07155	0.07726	0.0773	0.07689	0.0841	0.08145
			657.236	0.04204	0.0473	0.05203	0.04862	0.06195	0.06165	0.06325	0.07079	0.07169	0.07757	0.07753	0.07704	0.08446	0.08152
			656.507	0.04201	0.04733	0.05204	0.0487	0.06189	0.06164	0.06341	0.07098	0.07159	0.07764	0.07761	0.07741	0.08452	0.08161
			655.742	0.04225	0.04756	0.05236	0.04906	0.06226	0.06193	0.06366	0.07122	0.07203	0.07796	0.07796	0.07742	0.0848	0.08185
			655.013	0.04252	0.0479	0.05255	0.04919	0.06251	0.06216	0.06391	0.0713	0.07235	0.0782	0.07796	0.07788	0.08508	0.08217
			654.247	0.04238	0.04758	0.05243	0.04901	0.06246	0.06218	0.06384	0.0715	0.07252	0.07806	0.07802	0.07779	0.08507	0.08216
			653.517	0.04261	0.04778	0.05258	0.04924	0.06259	0.06228	0.0641	0.07161	0.07258	0.07815	0.07834	0.07785	0.08532	0.082
			652.751	0.04277	0.04798	0.05265	0.04952	0.06282	0.06233	0.06428	0.07181	0.07258	0.07828	0.07839	0.07801	0.08537	0.08245
			651.985	0.04283	0.04792	0.05313	0.04978	0.06301	0.06265	0.06447	0.07214	0.07289	0.07884	0.07865	0.07835	0.08561	0.08282
			651.255	0.04299	0.04843	0.05309	0.04982	0.06316	0.06317	0.06452	0.07206	0.0732	0.07891	0.07881	0.07859	0.08596	0.08291
			650.488	0.04329	0.04837	0.05323	0.04996	0.0634	0.06301	0.06477	0.07243	0.07351	0.07906	0.07917	0.07886	0.08615	0.08273
			649.757	0.04297	0.04844	0.05328	0.05017	0.06368	0.06318	0.06497	0.07244	0.07325	0.07917	0.07913	0.07891	0.08623	0.08293
			648.99	0.04338	0.04861	0.05354	0.05036	0.06385	0.06333	0.06498	0.07282	0.0737	0.07949	0.07975	0.07912	0.08655	0.08334
			648.26	0.04347	0.04867	0.05355	0.05037	0.0637	0.06361	0.06526	0.07263	0.07389	0.07935	0.07936	0.07926	0.08645	0.08349
			647.492	0.04343	0.0488	0.05362	0.0504	0.06388	0.06366	0.06525	0.0732	0.07374	0.07955	0.07962	0.07917	0.08663	0.08353
			646.761	0.04373	0.04913	0.0541	0.05056	0.06426	0.06389	0.06558	0.07317	0.07425	0.07973	0.07975	0.07935	0.08672	0.08367
			645.993	0.04412	0.04906	0.05401	0.05104	0.06431	0.06423	0.06605	0.0735	0.0745	0.08027	0.08016	0.07995	0.08722	0.08363
			645.262	0.0438	0.04906	0.05405	0.0508	0.06427	0.06394	0.06589	0.07338	0.07423	0.08012	0.07999	0.07962	0.08708	0.08395
			644.494	0.04427	0.04943	0.05431	0.0512	0.06483	0.06437	0.06615	0.07382	0.07468	0.08029	0.08024	0.08007	0.08721	0.08405
			643.762	0.04428	0.04968	0.05453	0.05126	0.06486	0.06449	0.06645	0.07391	0.07469	0.08064	0.08049	0.08031	0.0877	0.08419
			642.994	0.04436	0.04958	0.05457	0.05141	0.06495	0.06456	0.06665	0.07419	0.07503	0.08088	0.08057	0.08024	0.08754	0.08445
			642.262	0.04497	0.05011	0.05487	0.0518	0.06544	0.0652	0.06693	0.07443	0.07528	0.08135	0.08088	0.08093	0.08815	0.08485
			641.493	0.0448	0.05012	0.05517	0.05186	0.06548	0.06531	0.06706	0.07462	0.0755	0.08123	0.08117	0.08066	0.08804	0.08451
			640.761	0.0451	0.05055	0.05535	0.05212	0.06556	0.06547	0.06722	0.07486	0.07581	0.08146	0.08143	0.08114	0.08854	0.08521
			639.992	0.04498	0.0503	0.05511	0.05194	0.06565	0.06568	0.06734	0.07515	0.07561	0.08147	0.08147	0.08104	0.0884	0.08497
			639.259	0.04507	0.05081	0.05564	0.0524	0.06595	0.06602	0.06773	0.07537	0.07607	0.08192	0.08168	0.0813	0.08878	0.0854
			638.49	0.04539	0.05057	0.0559	0.0524	0.06608	0.06598	0.06784	0.07544	0.0761	0.08211	0.08209	0.08165	0.08899	0.08532
			637.757	0.04519	0.0506	0.0556	0.05248	0.06602	0.06596	0.0678	0.07535	0.0761	0.08191	0.08161	0.0814	0.08878	0.08522
			636.987	0.04567	0.05093	0.05597	0.05253	0.06649	0.06639	0.06805	0.07577	0.07661	0.08237	0.0821	0.08197	0.08905	0.08546
			636.254	0.04562	0.05105	0.05604	0.05287	0.06664	0.06643	0.06818	0.07594	0.07658	0.08232	0.08232	0.08208	0.08919	0.08567
			635.484	0.04596	0.05127	0.05634	0.05314	0.06668	0.06658	0.06839	0.07616	0.07707	0.08256	0.08261	0.08228	0.0896	0.08562
			634.75	0.04605	0.0513	0.05624	0.05325	0.06698	0.067	0.06862	0.07632	0.07706	0.08304	0.08264	0.08227	0.08964	0.08587
			634.017	0.04608	0.05147	0.05648	0.05329	0.06711	0.06693	0.06873	0.07654	0.07712	0.08286	0.08287	0.08241	0.08963	0.08613
			633.246	0.0462	0.05159	0.05645	0.05348	0.06723	0.06709	0.06882	0.07672	0.07745	0.08321	0.08294	0.08253	0.08982	0.08629
			632.512	0.04654	0.05179	0.05676	0.05379	0.06743	0.06735	0.06913	0.07678	0.07738	0.08322	0.08305	0.08285	0.09015	0.08637
			631.741	0.04664	0.052	0.05703	0.05397	0.06784	0.0676	0.06934	0.07714	0.0778	0.08337	0.08344	0.08307	0.09033	0.08669
			631.007	0.04677	0.05217	0.0572	0.05423	0.06803	0.06797	0.06967	0.07753	0.07788	0.08371	0.0838	0.08326	0.09067	0.08687
			630.236	0.04694	0.05218	0.05733	0.05424	0.06798	0.06819	0.06997	0.07748	0.07815	0.08417	0.08369	0.08338	0.0907	0.08687
			629.501	0.04701	0.0525	0.05756	0.05442	0.06827	0.06828	0.07014	0.07779	0.07834	0.08411	0.08396	0.08361	0.09081	0.08711
			628.766	0.04714	0.05255	0.05764	0.05462	0.06833	0.06849	0.07026	0.0778	0.07858	0.08431	0.08418	0.0838	0.091	0.08726
			627.995	0.04719	0.0527	0.05784	0.05466	0.06854	0.06883	0.07013	0.07803	0.07863	0.08453	0.08442	0.08394	0.09122	0.08733
			627.26	0.0473	0.05276	0.05762	0.05487	0.06865	0.06874	0.0705	0.07807	0.07881	0.08453	0.08431	0.08383	0.09129	0.08721
			626.487	0.04755	0.05305	0.05799	0.05512	0.06899	0.06917	0.07071	0.07839	0.07922	0.08471	0.08454	0.08435	0.0914	0.0878
			625.752	0.04761	0.05313	0.05811	0.05517	0.06927	0.06916	0.07085	0.07851	0.07923	0.08485	0.08466	0.08424	0.09146	0.08789
			625.016	0.04783	0.05343	0.05831	0.05543	0.06949	0.06943	0.07075	0.07884	0.07954	0.08508	0.08502	0.08466	0.0919	0.0879
			624.244	0.048	0.05348	0.05861	0.05571	0.06959	0.06974	0.07136	0.07908	0.0797	0.08546	0.08525	0.08487	0.09198	0.08829
			623.508	0.04816	0.0536	0.05864	0.05596	0.06987	0.06975	0.07145	0.07926	0.07987	0.08558	0.0854	0.08495	0.09228	0.08864
			622.735	0.04853	0.05376	0.05906	0.05612	0.06998	0.07012	0.07149	0.07957	0.08018	0.08603	0.08555	0.08512	0.09258	0.08874
			621.999	0.04844	0.05402	0.05897	0.056	0.07001	0.07033	0.07182	0.07943	0.08025	0.08584	0.08556	0.08537	0.09261	0.08859
			621.263	0.04857	0.054	0.05901	0.0563	0.07027	0.07032	0.07192	0.07984	0.08053	0.08612	0.08583	0.08555	0.09252	0.08855
			620.49	0.049	0.05449	0.05942	0.05664	0.07072	0.07074	0.07244	0.08034	0.08101	0.0866	0.08624	0.0859	0.09319	0.08917
			619.753	0.04888	0.0544	0.05942	0.05648	0.07084	0.07055	0.07241	0.0802	0.0808	0.0864	0.08615	0.08596	0.09285	0.08924
			619.016	0.04886	0.0545	0.05945	0.05674	0.07068	0.07093	0.07246	0.0803	0.08086	0.08653	0.08628	0.08615	0.09295	0.08891
			618.242	0.04919	0.05484	0.05977	0.05696	0.07113	0.07118	0.07285	0.08072	0.08138	0.08691	0.08657	0.08632	0.09332	0.0893
			617.505	0.04929	0.05493	0.05983	0.05725	0.07138	0.07133	0.07308	0.08089	0.08141	0.08713	0.08683	0.08633	0.09335	0.08955
			616.768	0.04938	0.05505	0.0599	0.05731	0.07151	0.07156	0.07307	0.08086	0.08172	0.08736	0.087	0.08643	0.09364	0.08978
			615.994	0.04979	0.05538	0.06033	0.05767	0.07172	0.0717	0.0735	0.08144	0.08185	0.08753	0.08739	0.08693	0.09387	0.08997
			615.256	0.04984	0.05547	0.06065	0.05771	0.07188	0.07202	0.07365	0.08147	0.08207	0.08772	0.0874	0.08698	0.09419	0.08993
			614.482	0.05019	0.0558	0.06073	0.05813	0.07238	0.07237	0.07396	0.08186	0.08243	0.088	0.08772	0.08741	0.09438	0.0905
			613.744	0.05023	0.05593	0.06092	0.05826	0.07235	0.07252	0.07425	0.08221	0.08268	0.08811	0.08773	0.08751	0.09467	0.09052
			613.006	0.05037	0.05592	0.06106	0.05821	0.07251	0.07272	0.07416	0.0823	0.08258	0.08832	0.08793	0.08768	0.09466	0.09063
			612.268	0.05069	0.05615	0.06119	0.05864	0.07266	0.07295	0.07466	0.08248	0.0829	0.08852	0.08825	0.08789	0.09499	0.09052
			611.492	0.0508	0.05645	0.06149	0.05883	0.07292	0.07305	0.07478	0.08259	0.08314	0.08886	0.08842	0.08792	0.09531	0.09077
			610.754	0.05093	0.0565	0.06163	0.05903	0.07306	0.07336	0.07494	0.08281	0.08334	0.08905	0.08852	0.08803	0.09529	0.09087
			610.015	0.05098	0.05667	0.0617	0.05899	0.07317	0.07348	0.07503	0.08281	0.08337	0.08891	0.08864	0.08829	0.09552	0.09108
			609.24	0.05108	0.05693	0.06152	0.05908	0.0737	0.07362	0.07519	0.08295	0.08364	0.08908	0.08857	0.08836	0.09513	0.09146
			608.501	0.05143	0.05706	0.06193	0.05948	0.07383	0.07391	0.07554	0.0833	0.08393	0.08938	0.08901	0.08868	0.0956	0.09165
			607.762	0.05158	0.05724	0.06219	0.05978	0.07398	0.07417	0.07569	0.08372	0.08407	0.08978	0.08925	0.0888	0.09582	0.09177
			606.986	0.05147	0.05738	0.06243	0.05989	0.07414	0.07423	0.07582	0.08372	0.08436	0.08973	0.08949	0.08911	0.0959	0.09169
			606.246	0.05184	0.05748	0.06276	0.06013	0.07414	0.07461	0.07619	0.0841	0.08454	0.09031	0.08967	0.08922	0.09639	0.092
			605.507	0.05211	0.05766	0.0629	0.06022	0.07448	0.07488	0.07645	0.08423	0.08474	0.09054	0.08996	0.08946	0.0966	0.09211
			604.767	0.05203	0.05771	0.06273	0.0603	0.07471	0.07494	0.07662	0.08418	0.08489	0.09036	0.0897	0.08948	0.09643	0.09213
			603.991	0.05232	0.05787	0.06278	0.06054	0.07501	0.07507	0.07673	0.08441	0.08515	0.09048	0.08999	0.08984	0.09653	0.09243
			603.251	0.05235	0.05814	0.06287	0.06063	0.07528	0.0753	0.07689	0.08456	0.08523	0.09055	0.0901	0.08992	0.09666	0.09267
			602.511	0.05255	0.05836	0.06315	0.06076	0.07552	0.07564	0.07721	0.08488	0.08551	0.0909	0.09035	0.09023	0.09675	0.09278
			601.733	0.05272	0.05851	0.06354	0.06099	0.07553	0.07571	0.07721	0.08512	0.08554	0.09098	0.09058	0.09038	0.09699	0.09284
			600.993	0.05296	0.0588	0.06371	0.06131	0.07574	0.07584	0.07772	0.08541	0.08594	0.09135	0.0908	0.09052	0.0973	0.09303
			600.252	0.05321	0.05884	0.06393	0.06156	0.07603	0.07633	0.07776	0.08555	0.08619	0.09161	0.09126	0.09084	0.09758	0.09327
			599.512	0.05318	0.05895	0.06405	0.06152	0.07622	0.07643	0.07802	0.08581	0.08621	0.09189	0.09138	0.09081	0.0977	0.09328
			598.734	0.05364	0.05937	0.06453	0.06206	0.0765	0.07664	0.07847	0.08631	0.08677	0.09217	0.09188	0.0914	0.09837	0.09366
			597.993	0.05384	0.05949	0.06491	0.0623	0.07668	0.07705	0.07865	0.08659	0.08683	0.09252	0.09182	0.09135	0.09875	0.09369
			597.252	0.05388	0.05969	0.06458	0.06224	0.07668	0.07708	0.07859	0.08651	0.08704	0.09244	0.09174	0.09137	0.09851	0.0937
			596.511	0.0541	0.05983	0.06483	0.0625	0.07724	0.07741	0.07888	0.08651	0.08725	0.09268	0.09211	0.09169	0.09844	0.09413
			595.732	0.0543	0.06016	0.06491	0.0627	0.0774	0.07758	0.07912	0.08682	0.08729	0.09279	0.09216	0.09185	0.0986	0.09436
			594.991	0.05431	0.06024	0.06516	0.06285	0.07755	0.0776	0.07948	0.08699	0.08761	0.0932	0.09234	0.09216	0.09885	0.09427
			594.249	0.0545	0.06031	0.06521	0.06303	0.07761	0.07802	0.07952	0.08717	0.08769	0.09322	0.0925	0.09224	0.09889	0.09455
			593.507	0.05463	0.06051	0.06544	0.06323	0.07789	0.07819	0.0796	0.08735	0.08786	0.09364	0.09289	0.09239	0.09929	0.09496
			592.765	0.05499	0.0611	0.06587	0.06353	0.07825	0.0783	0.0801	0.08794	0.08828	0.09379	0.09303	0.09259	0.09949	0.0951
			591.986	0.05525	0.06084	0.06612	0.06388	0.07827	0.0787	0.08051	0.08815	0.08852	0.09412	0.09342	0.09282	0.09982	0.09534
			591.244	0.05548	0.06114	0.06634	0.06417	0.07867	0.07898	0.08073	0.08822	0.08876	0.09439	0.09342	0.09293	0.09994	0.0954
			590.501	0.05553	0.06129	0.06641	0.0642	0.07878	0.07909	0.08081	0.08858	0.08882	0.09437	0.09359	0.09322	0.10001	0.09548
			589.759	0.05558	0.06164	0.06655	0.06427	0.07917	0.07934	0.08108	0.08866	0.08931	0.09456	0.09361	0.09343	0.10056	0.09582
			589.016	0.05581	0.06188	0.06686	0.06473	0.07939	0.07964	0.08131	0.0888	0.0894	0.09494	0.09383	0.09372	0.1004	0.09587
			588.236	0.05602	0.06183	0.06694	0.06474	0.07947	0.07984	0.0813	0.08905	0.08938	0.09504	0.0942	0.09385	0.10049	0.09625
			587.493	0.0564	0.06217	0.06722	0.06502	0.07959	0.08012	0.0817	0.08949	0.0899	0.0953	0.09441	0.09418	0.10074	0.09629
			586.75	0.05653	0.06239	0.06743	0.06519	0.08	0.08024	0.08184	0.08957	0.08991	0.09544	0.09462	0.09423	0.10106	0.09657
			586.007	0.0567	0.0626	0.0677	0.06544	0.08015	0.08065	0.08231	0.08988	0.09028	0.09575	0.09483	0.09448	0.10123	0.09656
			585.264	0.05694	0.0628	0.06791	0.06562	0.08034	0.08067	0.08236	0.09007	0.09055	0.09592	0.09496	0.09462	0.1014	0.09675
			584.483	0.05699	0.06285	0.06811	0.0659	0.08048	0.08107	0.0826	0.09009	0.09082	0.0961	0.09525	0.09465	0.10156	0.09682
			583.739	0.05702	0.06305	0.06815	0.06598	0.08071	0.08121	0.08286	0.09053	0.09072	0.09603	0.09536	0.09491	0.10182	0.09712
			582.995	0.05729	0.06332	0.06844	0.06626	0.08112	0.08146	0.08303	0.09062	0.09114	0.09669	0.0956	0.09509	0.10201	0.09726
			582.251	0.05755	0.06343	0.06872	0.06665	0.0814	0.08183	0.0833	0.09096	0.09139	0.09692	0.0958	0.09535	0.10219	0.09745
			581.507	0.05787	0.06384	0.06906	0.06692	0.0815	0.08191	0.08367	0.09134	0.09162	0.09718	0.09604	0.09572	0.10244	0.09779
			580.763	0.05789	0.06381	0.06911	0.06688	0.08166	0.08214	0.08366	0.09133	0.09187	0.09718	0.0962	0.09572	0.10254	0.09795
			580.019	0.05824	0.06417	0.06939	0.06707	0.08192	0.08244	0.08414	0.09174	0.0921	0.09749	0.09633	0.09625	0.10279	0.09817
			579.237	0.05854	0.06434	0.06964	0.06758	0.08223	0.0829	0.08439	0.09214	0.09237	0.09779	0.09669	0.09643	0.10304	0.09826
			578.492	0.05863	0.06441	0.06975	0.06772	0.08237	0.08289	0.08451	0.09222	0.0923	0.09789	0.09674	0.09641	0.1032	0.09862
			577.747	0.05883	0.06458	0.06974	0.06787	0.08238	0.08306	0.08472	0.09241	0.09253	0.09803	0.09686	0.09653	0.10328	0.09852
			577.002	0.05896	0.06491	0.07015	0.06804	0.08284	0.08329	0.085	0.09265	0.09292	0.09828	0.09715	0.09674	0.10365	0.09873
			576.257	0.05913	0.06505	0.07052	0.06831	0.0829	0.08357	0.08515	0.09278	0.09306	0.09853	0.09728	0.09688	0.10372	0.09898
			575.512	0.05932	0.06527	0.07057	0.06858	0.08335	0.08383	0.08547	0.09308	0.09337	0.09873	0.09753	0.09714	0.10393	0.09929
			574.767	0.05931	0.06523	0.07059	0.06841	0.08332	0.08393	0.08539	0.093	0.09335	0.09862	0.09757	0.09721	0.10369	0.09913
			573.984	0.05982	0.06578	0.07119	0.06915	0.08397	0.0843	0.08603	0.09366	0.09382	0.09926	0.098	0.09781	0.10445	0.09977
			573.238	0.06006	0.06598	0.07142	0.06937	0.08402	0.08468	0.08629	0.09387	0.0941	0.09951	0.09839	0.09798	0.10476	0.09997
			572.493	0.06025	0.06623	0.0714	0.06957	0.08421	0.08481	0.08649	0.09398	0.09431	0.09957	0.09833	0.09807	0.10479	0.0999
			571.747	0.06023	0.06632	0.07146	0.06957	0.08453	0.08514	0.08668	0.09401	0.09449	0.09952	0.09835	0.09821	0.10468	0.10029
			571.001	0.06036	0.06628	0.07171	0.06975	0.08474	0.08511	0.0866	0.09423	0.09446	0.09971	0.09843	0.09824	0.1048	0.10039
			570.254	0.06064	0.06665	0.072	0.07004	0.08487	0.08534	0.08703	0.09449	0.09474	0.09978	0.09876	0.09848	0.1049	0.10041
			569.508	0.06114	0.06705	0.07248	0.07057	0.08539	0.08585	0.0876	0.09508	0.09527	0.1004	0.09912	0.09903	0.10543	0.1009
			568.762	0.06125	0.06724	0.07261	0.07067	0.0856	0.086	0.08768	0.09516	0.09534	0.10061	0.09931	0.09898	0.10549	0.10109
			568.015	0.06155	0.06754	0.0731	0.07084	0.08566	0.0864	0.08798	0.09551	0.0955	0.10081	0.0997	0.09927	0.10573	0.10119
			567.268	0.06154	0.06765	0.07311	0.07104	0.0858	0.08648	0.08817	0.09572	0.09572	0.10108	0.09976	0.09947	0.10597	0.10117
			566.484	0.06173	0.06783	0.07314	0.07117	0.08632	0.08671	0.08825	0.09573	0.09607	0.10106	0.09987	0.09956	0.10591	0.10142
			565.737	0.06194	0.06792	0.07338	0.07136	0.08643	0.08692	0.08843	0.09588	0.09625	0.10142	0.1001	0.09979	0.10591	0.10166
			564.99	0.0623	0.0683	0.07368	0.07186	0.08681	0.08725	0.08876	0.09626	0.09664	0.10165	0.1004	0.1	0.10634	0.10197
			564.243	0.06247	0.06849	0.07388	0.07203	0.08697	0.08748	0.08902	0.09646	0.09683	0.1019	0.10058	0.10017	0.10642	0.10188
			563.495	0.06266	0.06885	0.07443	0.07218	0.08719	0.08786	0.08943	0.09695	0.09714	0.10231	0.10091	0.10052	0.10694	0.10226
			562.748	0.06289	0.06895	0.07447	0.07254	0.08738	0.08801	0.08958	0.09711	0.0972	0.10236	0.10086	0.10055	0.10696	0.10245
			562	0.06308	0.06918	0.07469	0.07272	0.08762	0.08831	0.08993	0.0972	0.09745	0.10239	0.10124	0.10101	0.10742	0.10253
			561.252	0.06339	0.06956	0.07497	0.07299	0.08788	0.08864	0.09016	0.09739	0.09776	0.10273	0.10137	0.10114	0.10738	0.103
			560.504	0.06358	0.06968	0.0752	0.07338	0.08837	0.08879	0.09041	0.09773	0.09792	0.103	0.10155	0.10145	0.10765	0.10295
			559.756	0.06393	0.06994	0.07555	0.07362	0.08869	0.08913	0.09063	0.09816	0.09842	0.10333	0.10198	0.1015	0.10784	0.10332
			559.008	0.06393	0.07001	0.07577	0.07377	0.08872	0.08934	0.09098	0.09827	0.09838	0.10337	0.102	0.1019	0.10796	0.10327
			558.259	0.06416	0.07022	0.07605	0.074	0.08901	0.08957	0.09116	0.09856	0.0985	0.1037	0.10218	0.10178	0.10819	0.10348
			557.511	0.06446	0.07055	0.07621	0.07415	0.0893	0.08976	0.09125	0.09876	0.09876	0.10386	0.10252	0.10216	0.10839	0.10358
			556.762	0.06472	0.07082	0.07647	0.0746	0.08968	0.0901	0.09177	0.09903	0.09918	0.10411	0.10271	0.10245	0.10864	0.10394
			556.013	0.0648	0.07102	0.07682	0.07479	0.08988	0.09036	0.09183	0.09931	0.09935	0.10441	0.10286	0.1025	0.10881	0.10416
			555.265	0.06521	0.0712	0.07716	0.07498	0.09001	0.09056	0.09211	0.09958	0.09957	0.10465	0.10306	0.10281	0.10905	0.10429
			554.516	0.06546	0.07155	0.07755	0.07544	0.09041	0.09095	0.09256	0.09997	0.09993	0.10496	0.10345	0.10307	0.10947	0.10448
			553.766	0.06567	0.07178	0.07764	0.07567	0.09055	0.09111	0.09267	0.10011	0.10008	0.10518	0.10363	0.10316	0.10944	0.10466
			553.017	0.06582	0.07211	0.07778	0.0759	0.09094	0.09142	0.09303	0.10031	0.10046	0.10533	0.10386	0.10354	0.10958	0.10514
			552.268	0.06595	0.07221	0.07797	0.07601	0.09119	0.09165	0.09312	0.10041	0.10045	0.10536	0.10395	0.10362	0.10961	0.10518
			551.518	0.06616	0.07248	0.07856	0.0763	0.0915	0.09203	0.09349	0.10089	0.10075	0.10575	0.10428	0.10376	0.10999	0.10547
			550.768	0.0665	0.07265	0.0787	0.07652	0.09163	0.09214	0.0936	0.10112	0.10094	0.10581	0.10436	0.10396	0.11003	0.10555
			550.018	0.06672	0.07285	0.07911	0.07696	0.09189	0.09242	0.09393	0.10133	0.10116	0.10628	0.10464	0.10413	0.11024	0.10573
			549.268	0.06701	0.07332	0.07952	0.07722	0.09222	0.09287	0.09425	0.10177	0.10144	0.10654	0.10493	0.10444	0.11075	0.10597
			548.518	0.06725	0.07335	0.07979	0.0774	0.09231	0.0929	0.09433	0.10199	0.10167	0.10672	0.10519	0.10464	0.11072	0.10587
			547.768	0.06747	0.07367	0.07997	0.07766	0.09248	0.09322	0.0947	0.10205	0.10189	0.10683	0.10526	0.10481	0.11097	0.10611
			547.018	0.0676	0.07385	0.08001	0.07778	0.09296	0.09349	0.09481	0.1021	0.10203	0.10684	0.10538	0.10492	0.1109	0.10646
			546.267	0.06778	0.07403	0.08043	0.07806	0.09322	0.09376	0.09515	0.10243	0.10218	0.10712	0.10547	0.10509	0.11116	0.10665
			545.517	0.06825	0.07449	0.08091	0.07848	0.09363	0.09416	0.09551	0.10288	0.10267	0.10757	0.10581	0.10539	0.11152	0.10698
			544.766	0.0684	0.07461	0.08126	0.0787	0.0936	0.09434	0.09563	0.10325	0.10276	0.10788	0.1062	0.10555	0.11177	0.10683
			544.015	0.06867	0.07497	0.0815	0.07904	0.09386	0.09467	0.09608	0.10343	0.10305	0.1081	0.10643	0.10576	0.11208	0.10709
			543.264	0.0689	0.07509	0.08178	0.07919	0.09422	0.09487	0.09623	0.10365	0.10325	0.10825	0.10647	0.10594	0.11203	0.10738
			542.513	0.06921	0.07546	0.08219	0.07959	0.09441	0.09526	0.09661	0.10404	0.10359	0.10864	0.10689	0.10622	0.11259	0.10742
			541.762	0.06929	0.07574	0.08204	0.07977	0.09482	0.09551	0.09668	0.10393	0.1038	0.10847	0.10679	0.10644	0.11225	0.10781
			541.01	0.06933	0.07574	0.08219	0.07977	0.09535	0.0955	0.09667	0.10376	0.10375	0.10838	0.1067	0.1065	0.11183	0.10824
			540.259	0.06979	0.07607	0.08286	0.0802	0.09554	0.09598	0.0971	0.10432	0.10405	0.10876	0.10711	0.1068	0.11225	0.10842
			539.507	0.06996	0.07633	0.08314	0.08049	0.09576	0.09618	0.09736	0.10461	0.10429	0.1091	0.10734	0.10688	0.11258	0.10829
			538.755	0.07039	0.07664	0.08376	0.08082	0.09598	0.0965	0.0977	0.10507	0.10464	0.10956	0.10774	0.10722	0.11311	0.10854
			538.003	0.07063	0.07689	0.0841	0.08117	0.09607	0.09685	0.09806	0.10549	0.10488	0.10989	0.10804	0.10739	0.11348	0.10857
			537.251	0.07091	0.07725	0.08425	0.08141	0.09659	0.09724	0.09829	0.10559	0.1052	0.11003	0.10816	0.10776	0.11355	0.10903
			536.499	0.07099	0.07746	0.08457	0.08164	0.09695	0.09739	0.09846	0.10577	0.10533	0.11	0.10819	0.10781	0.11336	0.10926
			535.747	0.07137	0.07773	0.08507	0.08203	0.09719	0.09763	0.09882	0.10612	0.10558	0.11046	0.10865	0.10805	0.11384	0.10933
			534.994	0.0717	0.07798	0.08554	0.08239	0.09726	0.09809	0.09924	0.10673	0.10588	0.111	0.10898	0.10825	0.11439	0.10931
			534.242	0.07197	0.07828	0.08554	0.08252	0.09748	0.09834	0.09937	0.1067	0.10611	0.11089	0.10907	0.10843	0.11441	0.10951
			533.489	0.07202	0.07838	0.08575	0.0826	0.09812	0.09844	0.09942	0.1066	0.10627	0.11081	0.10897	0.10864	0.11397	0.10992
			532.736	0.07231	0.07871	0.08632	0.08305	0.09839	0.09881	0.09971	0.10699	0.10646	0.11124	0.10921	0.10881	0.11424	0.11
			531.983	0.07261	0.07896	0.08673	0.08338	0.09855	0.09911	0.10012	0.10741	0.10671	0.11159	0.10949	0.10893	0.11469	0.11006
			531.268	0.07301	0.07934	0.0872	0.08373	0.09882	0.09937	0.10052	0.10779	0.10705	0.11198	0.10994	0.10925	0.11512	0.11025
			530.514	0.07329	0.07955	0.0876	0.08408	0.09904	0.09969	0.10084	0.10829	0.10728	0.11238	0.11034	0.10929	0.11558	0.11018
			529.761	0.07347	0.07988	0.08771	0.08425	0.09901	0.09997	0.10103	0.10838	0.10746	0.11237	0.11028	0.10954	0.11572	0.1103
			529.008	0.07354	0.08003	0.08766	0.0843	0.09973	0.10007	0.10091	0.10797	0.10755	0.11201	0.11005	0.10974	0.11491	0.11094
			528.254	0.07368	0.08035	0.08829	0.08457	0.10027	0.10042	0.10118	0.10823	0.10777	0.1123	0.11023	0.10999	0.11497	0.11129
			527.5	0.07411	0.08049	0.08887	0.08503	0.10039	0.10076	0.10165	0.10879	0.10809	0.11278	0.11074	0.11024	0.11554	0.11128
			526.746	0.07437	0.0808	0.08911	0.08536	0.10064	0.10103	0.1019	0.10899	0.1084	0.11305	0.11099	0.11035	0.11599	0.11129
			525.992	0.07451	0.08109	0.08929	0.08548	0.10087	0.10128	0.10201	0.10909	0.10857	0.11297	0.11096	0.11053	0.11583	0.11157
			525.238	0.07473	0.08132	0.08968	0.08572	0.1012	0.10151	0.10223	0.10929	0.10873	0.11322	0.11122	0.11077	0.11589	0.11169
			524.484	0.07502	0.08157	0.09007	0.08605	0.10141	0.10174	0.10256	0.10968	0.1089	0.11349	0.11143	0.1108	0.11623	0.11175
			523.767	0.07532	0.08182	0.0905	0.08639	0.10174	0.10206	0.10285	0.10996	0.10916	0.11399	0.11172	0.111	0.1164	0.11189
			523.013	0.07567	0.08218	0.09087	0.08678	0.10209	0.10244	0.10321	0.11036	0.10956	0.11419	0.11209	0.11141	0.11685	0.11226
			522.258	0.07598	0.08244	0.09121	0.08704	0.10217	0.10269	0.10351	0.11058	0.10975	0.11427	0.11222	0.11153	0.11701	0.11227
			521.504	0.0763	0.08276	0.09159	0.08725	0.10258	0.10303	0.1038	0.11094	0.11009	0.11464	0.11251	0.11179	0.11729	0.11253
			520.749	0.07651	0.08293	0.09199	0.08762	0.10275	0.10334	0.10398	0.11124	0.11018	0.11488	0.11266	0.1119	0.11749	0.11245
			519.994	0.07684	0.08324	0.09232	0.08796	0.10304	0.10358	0.10435	0.11154	0.11045	0.11517	0.11297	0.11207	0.11789	0.11261
			519.239	0.077	0.0835	0.09254	0.08811	0.10328	0.10382	0.10454	0.11156	0.11069	0.1152	0.11292	0.11223	0.11765	0.11281
			518.483	0.07727	0.08382	0.09285	0.08838	0.10386	0.10416	0.10481	0.11175	0.11091	0.1153	0.1131	0.11249	0.11768	0.11316
			517.766	0.07744	0.08402	0.09328	0.08873	0.10413	0.10434	0.105	0.11198	0.11112	0.11553	0.11325	0.11262	0.11781	0.11325
			517.01	0.07791	0.08438	0.09377	0.0891	0.10448	0.10485	0.10519	0.11224	0.11132	0.11571	0.11362	0.11293	0.11815	0.11358
			516.255	0.07816	0.08471	0.09416	0.0894	0.10474	0.10511	0.10571	0.11284	0.11177	0.11621	0.11391	0.11318	0.11844	0.11374
			515.499	0.07843	0.08487	0.09431	0.08959	0.10485	0.10517	0.10576	0.11299	0.112	0.11622	0.11405	0.1133	0.11856	0.11353
			514.743	0.07871	0.0852	0.09473	0.08991	0.1052	0.10552	0.10617	0.11322	0.11219	0.11648	0.11432	0.1135	0.11873	0.11377
			513.987	0.07905	0.08554	0.09516	0.09027	0.10548	0.10584	0.10656	0.11355	0.11251	0.11669	0.11446	0.11369	0.11902	0.11402
			513.231	0.07933	0.08579	0.09558	0.09061	0.10586	0.1063	0.10679	0.11379	0.11269	0.11705	0.11472	0.11392	0.11929	0.11426
			512.513	0.07963	0.08609	0.09584	0.09093	0.10626	0.10654	0.10707	0.11404	0.11288	0.11714	0.11487	0.1141	0.11934	0.11438
			511.756	0.07984	0.08638	0.09622	0.09117	0.10656	0.10684	0.10724	0.11431	0.11321	0.11748	0.11509	0.11428	0.11958	0.11459
			511	0.08013	0.08676	0.09662	0.09152	0.10687	0.10719	0.10757	0.11452	0.11346	0.11772	0.11539	0.11454	0.11985	0.11471
			510.243	0.08048	0.08704	0.09698	0.09186	0.10715	0.10749	0.1079	0.11492	0.11373	0.11794	0.11554	0.11479	0.1201	0.11493
			509.487	0.08066	0.08724	0.09719	0.09208	0.10732	0.10774	0.10798	0.115	0.11399	0.11807	0.11567	0.11488	0.12009	0.11498
			508.768	0.08109	0.08772	0.09771	0.09257	0.10786	0.1081	0.1085	0.11538	0.1143	0.11835	0.11596	0.11511	0.12046	0.1153
			508.011	0.08129	0.08799	0.09799	0.09274	0.108	0.10827	0.1088	0.11557	0.11443	0.11859	0.1161	0.11524	0.12034	0.11531
			507.254	0.08163	0.08826	0.09848	0.09312	0.10831	0.10868	0.10907	0.11579	0.1147	0.11888	0.1164	0.11553	0.1206	0.1155
			506.497	0.08208	0.08867	0.09889	0.09346	0.10873	0.10909	0.10939	0.11631	0.1151	0.11913	0.11672	0.11579	0.12108	0.11588
			505.739	0.08229	0.089	0.09929	0.09386	0.10904	0.10936	0.10968	0.11662	0.11529	0.11939	0.11697	0.11601	0.1212	0.11607
			504.982	0.08254	0.08922	0.09947	0.09411	0.10937	0.10964	0.10978	0.11663	0.1155	0.11946	0.11698	0.11614	0.1213	0.11614
			504.262	0.08286	0.08954	0.09981	0.09435	0.10953	0.10988	0.11011	0.11693	0.1157	0.11968	0.11727	0.11626	0.12133	0.11634
			503.504	0.0831	0.08982	0.10042	0.09466	0.11006	0.11029	0.11055	0.11723	0.11612	0.12001	0.11749	0.11648	0.12166	0.11644
			502.747	0.08342	0.09004	0.10065	0.09509	0.11038	0.11053	0.11081	0.11763	0.11627	0.12025	0.11767	0.11673	0.12197	0.1165
			501.989	0.08371	0.09029	0.10085	0.09537	0.11041	0.11078	0.11096	0.11771	0.11649	0.12041	0.11779	0.11682	0.12197	0.11663
			501.269	0.08409	0.09075	0.10136	0.09569	0.11098	0.11112	0.11138	0.11816	0.11683	0.12071	0.11825	0.11712	0.12222	0.11701
			500.51	0.08426	0.09106	0.10167	0.09603	0.11114	0.11144	0.11159	0.11841	0.11702	0.12102	0.1184	0.1172	0.12259	0.11704
			499.752	0.08452	0.09122	0.10189	0.09623	0.11133	0.11162	0.11172	0.11854	0.11706	0.12109	0.11849	0.1173	0.12253	0.11707
			498.994	0.08487	0.09151	0.10222	0.09662	0.11167	0.11197	0.11199	0.11877	0.11739	0.12131	0.11868	0.11755	0.12261	0.11728
			498.235	0.08511	0.09183	0.1025	0.09686	0.11198	0.1122	0.11232	0.11908	0.11759	0.12152	0.11886	0.11781	0.12289	0.11729
			497.515	0.0854	0.09217	0.10279	0.09708	0.11237	0.11252	0.11246	0.11919	0.1179	0.12157	0.11902	0.11793	0.12291	0.11766
			496.756	0.08574	0.09244	0.10339	0.09748	0.11288	0.11286	0.1128	0.1195	0.11821	0.12192	0.11922	0.11827	0.12304	0.11788
			495.997	0.08599	0.09272	0.10349	0.09784	0.11299	0.11313	0.11311	0.11971	0.11834	0.12212	0.11952	0.11833	0.1233	0.1179
			495.238	0.08635	0.09307	0.10412	0.09825	0.11333	0.11342	0.11357	0.12028	0.11871	0.12251	0.11979	0.11866	0.12365	0.11804
			494.517	0.08667	0.09339	0.10456	0.0985	0.11359	0.11372	0.11367	0.12051	0.11893	0.12288	0.11997	0.11884	0.1239	0.11805
			493.758	0.08718	0.09382	0.10519	0.09912	0.1139	0.1142	0.11434	0.12114	0.11932	0.12331	0.12054	0.11916	0.12465	0.11832
			492.998	0.08742	0.09413	0.10526	0.09928	0.11403	0.11444	0.11438	0.12105	0.11956	0.12316	0.12049	0.11923	0.12461	0.11833
			492.239	0.0874	0.09436	0.10527	0.09926	0.11468	0.11461	0.11439	0.12076	0.11962	0.12295	0.12024	0.1194	0.12391	0.11881
			491.517	0.08777	0.09459	0.10574	0.09964	0.11522	0.11491	0.11468	0.12114	0.11988	0.12329	0.12047	0.11962	0.12405	0.11907
			490.758	0.08825	0.095	0.1063	0.10009	0.11543	0.11535	0.11515	0.12174	0.12022	0.12384	0.12099	0.11977	0.12463	0.11913
			489.998	0.08876	0.09538	0.10686	0.10059	0.11556	0.11571	0.11554	0.12235	0.12056	0.12426	0.12148	0.12002	0.12521	0.11908
			489.238	0.08901	0.09571	0.10701	0.10083	0.11577	0.11593	0.11576	0.12241	0.12075	0.12427	0.12149	0.12023	0.12536	0.11915
			488.516	0.08907	0.09589	0.1072	0.10092	0.11606	0.11603	0.1158	0.1223	0.12087	0.12415	0.12137	0.12032	0.12509	0.11942
			487.756	0.08937	0.09622	0.1074	0.10131	0.1167	0.11647	0.1161	0.12242	0.12108	0.12435	0.12152	0.12057	0.12491	0.11996
			486.996	0.08972	0.09651	0.10796	0.10167	0.11704	0.11678	0.11645	0.12297	0.12138	0.12479	0.12188	0.12077	0.1254	0.11994
			486.235	0.09036	0.097	0.10885	0.10227	0.11724	0.11725	0.11707	0.12372	0.12182	0.12552	0.12255	0.121	0.12613	0.12
			485.513	0.09072	0.09749	0.10918	0.10271	0.11731	0.11763	0.11738	0.12399	0.12213	0.12561	0.12273	0.12128	0.12664	0.12005
			484.752	0.09064	0.09761	0.1088	0.10264	0.11791	0.11775	0.11723	0.12344	0.12218	0.12514	0.1223	0.12138	0.12582	0.12048
			483.991	0.09076	0.09775	0.1088	0.10274	0.11871	0.11792	0.1173	0.12341	0.1222	0.12521	0.12223	0.12148	0.12534	0.12089
			483.269	0.09126	0.09826	0.10948	0.10326	0.11889	0.11838	0.11773	0.12399	0.12259	0.12568	0.12275	0.12187	0.12586	0.12095
			482.508	0.09163	0.09851	0.10987	0.1036	0.11902	0.11871	0.118	0.12437	0.12281	0.12591	0.12294	0.12204	0.12622	0.12108
			481.747	0.09191	0.09889	0.11036	0.10398	0.11948	0.11897	0.11845	0.12483	0.12305	0.12633	0.12329	0.12223	0.12652	0.12121
			480.985	0.09238	0.09931	0.11078	0.10444	0.11971	0.11942	0.11882	0.1251	0.12344	0.12656	0.12359	0.12246	0.1268	0.12133
			480.262	0.09271	0.09967	0.11116	0.10481	0.11988	0.11959	0.1191	0.12543	0.1237	0.12685	0.12388	0.12265	0.12716	0.12131
			479.501	0.09297	0.09996	0.11149	0.10519	0.12031	0.11997	0.11931	0.12569	0.12395	0.12711	0.1241	0.12282	0.1273	0.12154
			478.739	0.09333	0.10037	0.11178	0.10547	0.12078	0.12032	0.1197	0.12606	0.12427	0.12731	0.12419	0.12305	0.12743	0.12188
			478.016	0.09376	0.10078	0.11225	0.10583	0.12108	0.12067	0.11992	0.12627	0.12447	0.1275	0.12445	0.12327	0.12768	0.12202
			477.254	0.09402	0.10103	0.11243	0.10613	0.12135	0.12092	0.1202	0.12633	0.12468	0.12766	0.12468	0.12338	0.1277	0.1221
			476.492	0.09441	0.10146	0.11278	0.10641	0.12177	0.12126	0.12053	0.12674	0.12489	0.1279	0.12491	0.12362	0.12799	0.12229
			475.768	0.09474	0.10176	0.11326	0.10681	0.12208	0.12156	0.12081	0.12701	0.12515	0.12811	0.12505	0.12376	0.12815	0.12238
			475.006	0.09503	0.102	0.11362	0.10721	0.12227	0.12193	0.12109	0.1273	0.1254	0.1284	0.12524	0.12405	0.12839	0.12253
			474.244	0.09541	0.10244	0.11394	0.1075	0.12279	0.12218	0.12135	0.12764	0.12575	0.12869	0.12544	0.12412	0.12864	0.12277
			473.482	0.0958	0.10285	0.11431	0.10786	0.12302	0.12252	0.12169	0.12782	0.12595	0.12897	0.12572	0.12442	0.12873	0.12282
			472.757	0.09604	0.10309	0.1147	0.10819	0.12331	0.12292	0.12195	0.1281	0.12625	0.12908	0.12589	0.12453	0.12893	0.12299
			471.995	0.09643	0.10348	0.11497	0.10858	0.12371	0.12318	0.12226	0.12829	0.12636	0.1293	0.12606	0.1247	0.12898	0.12313
			471.232	0.09668	0.10386	0.11534	0.10893	0.12405	0.12352	0.12249	0.12862	0.12665	0.12946	0.12627	0.12491	0.12918	0.12324
			470.508	0.09713	0.10432	0.11577	0.1093	0.12444	0.12377	0.12284	0.12896	0.12692	0.12983	0.1265	0.12518	0.12937	0.12352
			469.745	0.09743	0.10465	0.11606	0.10968	0.12474	0.12411	0.12311	0.12933	0.12718	0.13004	0.12673	0.1252	0.12957	0.12363
			468.982	0.09786	0.10492	0.11646	0.10992	0.12504	0.12443	0.12342	0.1295	0.12751	0.13023	0.12702	0.12545	0.12985	0.1238
			468.257	0.0981	0.10524	0.11665	0.11026	0.1254	0.12471	0.12371	0.12973	0.12759	0.13033	0.12708	0.12563	0.12987	0.12387
			467.494	0.09843	0.10557	0.11687	0.11063	0.12579	0.12503	0.12393	0.13003	0.12799	0.13071	0.12727	0.1258	0.13001	0.12409
			466.769	0.09892	0.10603	0.11748	0.11107	0.12614	0.1255	0.12432	0.13038	0.1282	0.13089	0.1276	0.12616	0.13036	0.12428
			466.005	0.0992	0.10642	0.11763	0.1114	0.12657	0.1258	0.12457	0.13053	0.12848	0.13115	0.12775	0.12634	0.1304	0.12454
			465.242	0.09952	0.10671	0.11807	0.11175	0.12689	0.12613	0.12493	0.13085	0.12872	0.13125	0.12785	0.12655	0.13049	0.12464
			464.516	0.09989	0.10715	0.11847	0.11222	0.12727	0.12646	0.12527	0.13129	0.12899	0.13156	0.12823	0.12674	0.13081	0.12485
			463.752	0.10029	0.10753	0.11901	0.11256	0.12767	0.12686	0.12557	0.13146	0.1293	0.13186	0.12844	0.12684	0.13104	0.12507
			462.988	0.10073	0.10785	0.11936	0.11291	0.12788	0.1272	0.1259	0.13188	0.12953	0.13218	0.12882	0.12706	0.13136	0.12509
			462.263	0.10124	0.10825	0.11997	0.11341	0.1283	0.12758	0.12621	0.13233	0.12987	0.13251	0.12918	0.12743	0.1317	0.12537
			461.499	0.10145	0.10866	0.12	0.11375	0.12855	0.12782	0.12654	0.13245	0.13007	0.13257	0.12912	0.12752	0.13174	0.12541
			460.734	0.10169	0.10899	0.11969	0.11393	0.12916	0.12814	0.1266	0.13232	0.13016	0.13252	0.12916	0.12776	0.13139	0.12587
			460.008	0.10207	0.10929	0.12017	0.11431	0.12963	0.12849	0.12701	0.1327	0.13049	0.13279	0.12931	0.12804	0.13158	0.12618
			459.244	0.1025	0.10975	0.1207	0.11476	0.12995	0.1288	0.12739	0.13298	0.13081	0.13313	0.12962	0.12821	0.13188	0.12632
			458.518	0.10288	0.1102	0.12126	0.1152	0.1303	0.12927	0.12769	0.13343	0.13111	0.13341	0.12996	0.12836	0.13233	0.12637
			457.753	0.10329	0.11051	0.12147	0.11547	0.13059	0.12951	0.12801	0.13372	0.13128	0.13357	0.13011	0.12842	0.13236	0.12647
			456.988	0.10366	0.11085	0.12198	0.11593	0.13094	0.12987	0.12827	0.13396	0.13155	0.13384	0.13031	0.12868	0.13258	0.12666
			456.262	0.10401	0.11127	0.12238	0.11627	0.13135	0.13023	0.12862	0.13429	0.13177	0.13402	0.13049	0.12888	0.13273	0.12677
			455.497	0.10448	0.11179	0.123	0.11681	0.13185	0.13071	0.12902	0.13479	0.13221	0.1345	0.13089	0.12917	0.13328	0.12716
			454.732	0.10485	0.11215	0.12326	0.11718	0.13203	0.13094	0.12937	0.13507	0.13238	0.13474	0.1311	0.12945	0.13349	0.1273
			454.005	0.1052	0.11256	0.12335	0.11756	0.13249	0.13129	0.12961	0.13517	0.13258	0.13481	0.13121	0.1296	0.13334	0.12736
			453.24	0.10554	0.11288	0.12355	0.11787	0.1329	0.13167	0.12987	0.13539	0.13287	0.13509	0.1314	0.12981	0.13348	0.12762
			452.513	0.10597	0.1133	0.12414	0.11826	0.13336	0.13199	0.13024	0.13572	0.13315	0.13529	0.13165	0.12999	0.13373	0.12784
			451.747	0.10638	0.1137	0.12457	0.11877	0.13361	0.13233	0.13055	0.13617	0.1334	0.13562	0.13193	0.13023	0.13396	0.12797
			450.981	0.1068	0.11403	0.125	0.11908	0.13396	0.13266	0.13079	0.13634	0.13365	0.13579	0.13207	0.13035	0.13414	0.12804
			450.254	0.10709	0.11449	0.12535	0.11946	0.13431	0.13302	0.13113	0.13668	0.13394	0.136	0.13238	0.13057	0.13433	0.12829
			449.488	0.10749	0.11483	0.12559	0.11987	0.13465	0.13332	0.13142	0.13696	0.13421	0.13627	0.13254	0.1307	0.13451	0.12839
			448.761	0.10795	0.11535	0.12578	0.12023	0.13509	0.13374	0.13171	0.13721	0.13451	0.13658	0.13274	0.13091	0.13473	0.12866
			447.995	0.10826	0.11573	0.12599	0.12056	0.13557	0.13399	0.13203	0.13736	0.1347	0.13666	0.13287	0.13111	0.13472	0.12886
			447.267	0.10865	0.11611	0.12629	0.12102	0.13604	0.13437	0.13235	0.13765	0.13501	0.13687	0.13313	0.13146	0.13496	0.12915
			446.501	0.10908	0.11653	0.12667	0.12145	0.13643	0.13479	0.13279	0.13806	0.13527	0.13717	0.13336	0.13163	0.13514	0.12939
			445.734	0.10944	0.1169	0.12706	0.12177	0.13669	0.13509	0.13297	0.13833	0.13556	0.13745	0.13355	0.1318	0.13533	0.12953
			445.006	0.10983	0.11729	0.12757	0.12222	0.13706	0.13544	0.13329	0.1386	0.13573	0.13767	0.13382	0.13197	0.13554	0.12954
			444.24	0.11029	0.11778	0.12792	0.12267	0.13748	0.13589	0.13366	0.13902	0.13612	0.13794	0.1341	0.13224	0.13584	0.12978
			443.511	0.11081	0.11816	0.12841	0.1231	0.1379	0.13625	0.13415	0.13928	0.13636	0.1383	0.13436	0.13241	0.13607	0.12991
			442.745	0.11116	0.11862	0.12859	0.12346	0.1382	0.13652	0.13428	0.13959	0.1366	0.13846	0.13446	0.13253	0.13629	0.13011
			442.016	0.11142	0.11894	0.12858	0.12377	0.13864	0.13687	0.13452	0.13969	0.13683	0.13852	0.13459	0.13282	0.13623	0.13025
			441.249	0.11186	0.11937	0.12877	0.12415	0.13909	0.13725	0.13482	0.13997	0.13706	0.13874	0.13474	0.13302	0.13631	0.13056
			440.482	0.11227	0.11978	0.1293	0.12466	0.1395	0.13755	0.13523	0.14028	0.13725	0.13901	0.13503	0.13321	0.13655	0.13067
			439.753	0.11268	0.12026	0.12965	0.12499	0.13986	0.13791	0.13548	0.14055	0.13756	0.13916	0.13509	0.1333	0.13667	0.13088
			438.986	0.11316	0.1206	0.13001	0.12541	0.14027	0.13825	0.13575	0.14083	0.13787	0.13956	0.13539	0.13356	0.13679	0.131
			438.257	0.11366	0.12107	0.1305	0.126	0.14072	0.13877	0.13624	0.14123	0.13819	0.13977	0.13572	0.13384	0.13714	0.13124
			437.49	0.11402	0.12149	0.13096	0.12633	0.14108	0.13904	0.13643	0.14155	0.13846	0.14006	0.13588	0.134	0.13735	0.1314
			436.76	0.11454	0.12193	0.1314	0.12686	0.14148	0.13944	0.13676	0.14187	0.13873	0.1403	0.13617	0.13416	0.13756	0.13155
			435.993	0.11494	0.1224	0.13178	0.12726	0.14187	0.13985	0.13721	0.14226	0.13907	0.14062	0.13645	0.13449	0.13779	0.13174
			435.263	0.11541	0.12285	0.13208	0.1276	0.14229	0.1402	0.13748	0.14241	0.13927	0.14075	0.13665	0.13463	0.138	0.13191
			434.495	0.1157	0.12338	0.13234	0.12807	0.14269	0.14049	0.13778	0.14267	0.13948	0.14088	0.13667	0.13483	0.13796	0.13214
			433.766	0.11623	0.12368	0.13267	0.12849	0.14311	0.14081	0.13805	0.14295	0.13975	0.14124	0.13698	0.1349	0.13816	0.13234
			432.998	0.1167	0.1242	0.13325	0.12894	0.14355	0.14128	0.13834	0.14326	0.13996	0.14145	0.13718	0.13513	0.13827	0.13245
			432.268	0.11723	0.12461	0.13372	0.12943	0.1439	0.1416	0.13869	0.14364	0.14029	0.14171	0.13741	0.13539	0.13855	0.13261
			431.5	0.11765	0.12518	0.13425	0.12993	0.14443	0.1422	0.13922	0.14406	0.14068	0.14206	0.13777	0.13569	0.13894	0.13284
			430.731	0.11816	0.12571	0.13465	0.13047	0.14494	0.14253	0.1396	0.14441	0.14095	0.14243	0.13803	0.13588	0.13916	0.1331
			430.001	0.11856	0.12607	0.13501	0.13087	0.14526	0.14281	0.13981	0.14467	0.14119	0.14259	0.13823	0.136	0.13922	0.1332
			429.233	0.11912	0.12667	0.13552	0.13139	0.14572	0.1433	0.14029	0.14497	0.14156	0.14294	0.1385	0.13639	0.13964	0.1334
			428.502	0.11958	0.12708	0.13604	0.1318	0.14616	0.14371	0.1406	0.14531	0.14178	0.14318	0.13877	0.13656	0.13971	0.13352
			427.734	0.12004	0.1276	0.13632	0.13231	0.14661	0.14403	0.14087	0.14561	0.14211	0.14341	0.13893	0.13675	0.13993	0.13367
			427.003	0.12049	0.128	0.1367	0.13263	0.14694	0.14446	0.14124	0.14591	0.14235	0.14358	0.13915	0.13692	0.14005	0.13389
			426.234	0.12105	0.12852	0.13715	0.1332	0.14741	0.1448	0.14158	0.14621	0.14258	0.14383	0.13937	0.1372	0.14026	0.13401
			425.504	0.12133	0.1289	0.13717	0.13348	0.14784	0.14516	0.14176	0.14631	0.14275	0.14396	0.13943	0.1373	0.14017	0.1342
			424.734	0.12184	0.12935	0.13763	0.13401	0.14836	0.14559	0.14214	0.1466	0.14308	0.14427	0.13962	0.13759	0.14026	0.13442
			424.003	0.12238	0.12982	0.13826	0.13451	0.14883	0.14595	0.14254	0.14702	0.14339	0.14458	0.13997	0.13772	0.14076	0.13462
			423.234	0.12282	0.13032	0.13878	0.13495	0.14906	0.1463	0.14283	0.14743	0.14367	0.14483	0.14021	0.13789	0.14093	0.13465
			422.503	0.12327	0.13079	0.1388	0.13535	0.1496	0.14667	0.14314	0.14745	0.14385	0.14488	0.1403	0.13807	0.14088	0.13506
			421.734	0.12369	0.13126	0.13898	0.13577	0.15018	0.14709	0.1434	0.1477	0.14406	0.14517	0.14047	0.13833	0.14088	0.13523
			421.002	0.12418	0.13172	0.13955	0.13624	0.15056	0.14741	0.1437	0.14803	0.14427	0.14538	0.14066	0.13852	0.14108	0.13538
			420.232	0.1247	0.13223	0.14004	0.13677	0.15104	0.14789	0.14415	0.14834	0.14462	0.14571	0.14094	0.13882	0.14137	0.13558
			419.501	0.12512	0.13268	0.14045	0.13719	0.15138	0.14832	0.1445	0.14861	0.14484	0.1458	0.14113	0.13901	0.14156	0.13567
			418.731	0.12558	0.13306	0.14078	0.13755	0.15186	0.14852	0.14466	0.14884	0.14501	0.14609	0.14127	0.13906	0.14163	0.13578
			418	0.12613	0.13359	0.1414	0.13802	0.15217	0.14896	0.14496	0.14921	0.14528	0.14631	0.1415	0.13934	0.14185	0.13582
			417.268	0.12671	0.13414	0.14185	0.13854	0.15265	0.1494	0.1454	0.14952	0.14558	0.14655	0.14177	0.13944	0.14208	0.13607
			416.498	0.12718	0.13465	0.1423	0.13907	0.15306	0.14982	0.14577	0.14992	0.14589	0.14691	0.14202	0.13974	0.14234	0.13622
			415.766	0.12765	0.13505	0.14273	0.13948	0.15345	0.15009	0.1461	0.15018	0.14608	0.1471	0.14217	0.13984	0.14247	0.13634
			414.995	0.12812	0.1355	0.14308	0.13988	0.15399	0.15052	0.14644	0.15037	0.14634	0.1473	0.14236	0.14007	0.14251	0.1365
			414.263	0.12873	0.1362	0.14377	0.1404	0.1545	0.15097	0.14683	0.15082	0.14663	0.14765	0.14278	0.14042	0.14288	0.13671
			413.493	0.12919	0.13661	0.1443	0.14101	0.15481	0.15136	0.14719	0.15119	0.14686	0.14779	0.14281	0.14046	0.14312	0.13678
			412.76	0.12995	0.13721	0.14492	0.14158	0.15525	0.15186	0.14749	0.15167	0.1472	0.14821	0.14331	0.14078	0.14341	0.13682
			411.99	0.13029	0.13782	0.1451	0.14202	0.15571	0.15214	0.14789	0.15175	0.14744	0.14834	0.14334	0.14092	0.1436	0.13699
			411.257	0.13077	0.13828	0.14534	0.14246	0.15642	0.15266	0.14815	0.15197	0.14769	0.14855	0.1434	0.14115	0.14353	0.13734
			410.486	0.13127	0.13872	0.1459	0.14283	0.15672	0.15296	0.14842	0.15223	0.14785	0.1488	0.14361	0.14132	0.1436	0.13747
			409.754	0.1318	0.13929	0.1466	0.14339	0.15725	0.15335	0.14883	0.1526	0.14818	0.14903	0.14397	0.14151	0.14391	0.13744
			408.982	0.13239	0.13981	0.14709	0.14398	0.15753	0.15371	0.14921	0.15299	0.14838	0.14925	0.14413	0.14173	0.14416	0.13759
			408.25	0.13293	0.14039	0.14759	0.14452	0.15808	0.15426	0.14954	0.1533	0.14867	0.14956	0.1444	0.14188	0.14444	0.13765
			407.517	0.13359	0.14094	0.14817	0.14496	0.15857	0.15472	0.14995	0.15376	0.14908	0.14988	0.14478	0.14218	0.14466	0.13792
			406.745	0.13413	0.14152	0.14863	0.14547	0.15892	0.15507	0.15027	0.15407	0.14921	0.15015	0.14495	0.14236	0.14482	0.13801
			406.012	0.13465	0.14214	0.14892	0.14599	0.15943	0.15547	0.15055	0.15416	0.14952	0.1503	0.14507	0.14265	0.14488	0.13823
			405.24	0.13496	0.14243	0.14912	0.14622	0.15996	0.15581	0.1507	0.15425	0.14966	0.15033	0.14509	0.14263	0.14463	0.13845
			404.507	0.13568	0.14317	0.14989	0.1469	0.16056	0.15623	0.15124	0.1548	0.15	0.15067	0.14541	0.14299	0.14496	0.13859
			403.735	0.1362	0.14373	0.15044	0.14739	0.16099	0.15673	0.15159	0.15502	0.15032	0.15098	0.14561	0.14319	0.14515	0.13872
			403.002	0.13678	0.14426	0.15105	0.14801	0.16137	0.15714	0.15192	0.15531	0.15057	0.15121	0.14589	0.14329	0.14536	0.1387
			402.268	0.1374	0.14487	0.15172	0.14865	0.16189	0.15765	0.15233	0.15587	0.15087	0.15147	0.14625	0.14354	0.14556	0.13887
			401.496	0.13807	0.1455	0.15227	0.14907	0.16229	0.15798	0.15264	0.15611	0.15106	0.15184	0.14639	0.14368	0.14587	0.139
			400.762	0.13857	0.14602	0.15265	0.14966	0.16273	0.15834	0.153	0.15632	0.15127	0.15193	0.14663	0.14388	0.1461	0.13906
			399.99	0.13913	0.14657	0.15305	0.15007	0.16337	0.15878	0.1534	0.15655	0.15155	0.15216	0.14676	0.14398	0.146	0.13944
			399.256	0.13964	0.14709	0.15355	0.15054	0.16372	0.15914	0.15362	0.15676	0.1518	0.15236	0.14683	0.14422	0.14621	0.13948
			398.484	0.14031	0.14779	0.15428	0.15119	0.16427	0.15954	0.15406	0.15728	0.15214	0.15275	0.1472	0.14443	0.14645	0.13967
			397.75	0.14088	0.14825	0.1549	0.15168	0.16468	0.16	0.1544	0.1576	0.15237	0.15293	0.14746	0.14459	0.14664	0.13977
			397.016	0.14162	0.14905	0.15573	0.1524	0.16512	0.16049	0.15486	0.15817	0.15264	0.15348	0.14789	0.14485	0.14729	0.1397
			396.243	0.14223	0.14975	0.15602	0.1529	0.16565	0.16091	0.15519	0.15836	0.15298	0.15345	0.14797	0.14514	0.14736	0.13991
			395.508	0.14244	0.14997	0.15596	0.15303	0.16615	0.16109	0.15527	0.1581	0.15304	0.15331	0.14774	0.14513	0.1467	0.14013
			394.735	0.14311	0.15057	0.15678	0.15359	0.16663	0.16154	0.15564	0.15873	0.15328	0.15382	0.14825	0.14532	0.14716	0.14021
			394.001	0.14386	0.15126	0.15781	0.15441	0.16698	0.16201	0.15612	0.15937	0.15358	0.15433	0.14877	0.14551	0.14789	0.14013
			393.266	0.14419	0.15189	0.1577	0.15476	0.16734	0.16232	0.15629	0.15914	0.15375	0.15403	0.14847	0.14571	0.14764	0.14029
			392.493	0.14464	0.15225	0.15796	0.15511	0.16823	0.16275	0.1565	0.15922	0.15387	0.15414	0.14838	0.14583	0.14709	0.14091
			391.758	0.14529	0.15281	0.15882	0.15565	0.16848	0.16306	0.15679	0.1596	0.15409	0.15453	0.14875	0.14595	0.14756	0.14077
			390.985	0.14609	0.15345	0.1596	0.15623	0.16884	0.16351	0.15719	0.16012	0.1545	0.15496	0.14918	0.14613	0.14794	0.14081
			390.25	0.14653	0.15404	0.16002	0.15674	0.16917	0.1638	0.1575	0.16023	0.15453	0.15496	0.1492	0.14616	0.14811	0.14081
			389.515	0.14718	0.15468	0.16073	0.15732	0.16981	0.16429	0.15794	0.16079	0.1548	0.15534	0.14963	0.14643	0.14852	0.14089
			388.741	0.14764	0.15518	0.16084	0.15771	0.17005	0.16455	0.15806	0.16072	0.15505	0.15532	0.14942	0.14657	0.14841	0.14093
			388.006	0.14827	0.15572	0.16136	0.15819	0.17069	0.16495	0.15836	0.16095	0.15523	0.15544	0.1497	0.14672	0.14832	0.14119
			387.232	0.14888	0.15633	0.16201	0.15877	0.17113	0.16539	0.15877	0.16127	0.15545	0.15568	0.14992	0.14699	0.14864	0.14118
			386.497	0.14935	0.15687	0.16261	0.1593	0.17155	0.16573	0.15909	0.16163	0.15572	0.15609	0.15023	0.14703	0.14862	0.14131
			385.761	0.15016	0.15758	0.16343	0.15991	0.17202	0.1662	0.15944	0.16203	0.15604	0.15629	0.15045	0.14724	0.14915	0.14147
			384.987	0.15065	0.15821	0.16361	0.16039	0.17238	0.16655	0.15962	0.16206	0.15613	0.15632	0.15039	0.14738	0.14877	0.14162
			384.252	0.1513	0.15868	0.16431	0.16092	0.17313	0.16702	0.15996	0.16225	0.1564	0.15663	0.15061	0.14758	0.14892	0.14198
			383.516	0.15189	0.1593	0.16498	0.16134	0.17351	0.16744	0.16044	0.1628	0.15661	0.15693	0.15082	0.14775	0.14926	0.14196
			382.741	0.15263	0.16013	0.16564	0.16203	0.17393	0.16775	0.16074	0.16323	0.15688	0.15717	0.15112	0.14784	0.14953	0.14204
			382.006	0.15322	0.16076	0.16632	0.16264	0.17445	0.16821	0.16115	0.16336	0.15726	0.15735	0.15134	0.14825	0.14962	0.14226
			381.231	0.15384	0.16129	0.16696	0.16315	0.17487	0.16855	0.16142	0.16362	0.15737	0.15765	0.15158	0.14825	0.14986	0.14243
			380.495	0.15455	0.16195	0.16768	0.16368	0.17536	0.16908	0.16178	0.16418	0.15775	0.15789	0.15195	0.14842	0.15027	0.14227
			379.759	0.15531	0.16262	0.16846	0.16435	0.17572	0.16942	0.16223	0.16466	0.15793	0.15822	0.15227	0.14851	0.15081	0.14221
			378.984	0.15569	0.16322	0.1684	0.16476	0.17603	0.16971	0.1623	0.16426	0.1581	0.15784	0.15193	0.14868	0.15042	0.14243
			378.248	0.15611	0.16363	0.16854	0.16506	0.1769	0.17007	0.1624	0.16431	0.15814	0.15807	0.1518	0.14892	0.14992	0.143
			377.511	0.15683	0.16425	0.16945	0.16569	0.17739	0.17058	0.16282	0.16477	0.15836	0.15832	0.15214	0.14903	0.1503	0.14316
			376.736	0.15748	0.16495	0.1701	0.16625	0.17777	0.1709	0.16317	0.16509	0.15858	0.15851	0.15243	0.14918	0.15049	0.14312
			376	0.15816	0.16563	0.17074	0.16685	0.17827	0.1712	0.16351	0.16535	0.15893	0.15892	0.15266	0.14931	0.15083	0.14316
			375.263	0.15873	0.16614	0.17132	0.16726	0.17857	0.1717	0.16371	0.16558	0.15909	0.15904	0.15276	0.1494	0.15083	0.14321
			374.488	0.1595	0.16691	0.17219	0.16794	0.17925	0.17226	0.16417	0.16604	0.15937	0.15943	0.15312	0.14974	0.1512	0.1434
			373.751	0.16021	0.16761	0.17294	0.16863	0.17955	0.17264	0.1647	0.16648	0.15967	0.15965	0.1534	0.15005	0.15131	0.14354
			373.014	0.16082	0.16827	0.17337	0.16902	0.18003	0.17298	0.16493	0.1666	0.15998	0.15982	0.15349	0.15013	0.15164	0.14368
			372.238	0.16142	0.16879	0.17376	0.16948	0.18059	0.17342	0.16527	0.16676	0.16003	0.15988	0.15354	0.1503	0.15146	0.14404
			371.501	0.16206	0.16953	0.17464	0.17016	0.18115	0.17397	0.16565	0.16714	0.16045	0.16031	0.15381	0.15053	0.15162	0.14416
			370.764	0.16271	0.17012	0.17528	0.17075	0.18159	0.17427	0.16582	0.16741	0.16061	0.1605	0.15416	0.15069	0.15198	0.14406
			369.988	0.16358	0.17077	0.17606	0.1713	0.18205	0.17472	0.16632	0.16789	0.1609	0.16083	0.15439	0.15093	0.15221	0.14429
			369.251	0.16424	0.17151	0.17676	0.17197	0.18241	0.175	0.16649	0.16828	0.16122	0.16101	0.15462	0.1509	0.15254	0.14407
			368.514	0.16462	0.17204	0.17686	0.17227	0.18285	0.17531	0.16672	0.16813	0.16117	0.16097	0.15446	0.15112	0.15222	0.14431
			367.738	0.1654	0.17271	0.17777	0.17292	0.18353	0.17583	0.16716	0.16858	0.16156	0.16134	0.15488	0.1512	0.15254	0.14469
			367	0.16613	0.17344	0.17841	0.17349	0.18378	0.17604	0.16739	0.16897	0.16175	0.16161	0.15508	0.15139	0.15279	0.14465
			366.262	0.16678	0.17395	0.17908	0.17405	0.18422	0.17652	0.16782	0.16931	0.16195	0.16173	0.15525	0.15161	0.15301	0.1446
			365.486	0.16723	0.17465	0.17959	0.17443	0.18464	0.17679	0.16799	0.16941	0.16213	0.16196	0.15546	0.1517	0.15304	0.14463
			364.748	0.16814	0.17536	0.18065	0.17526	0.18524	0.17735	0.16857	0.17022	0.16243	0.16251	0.15603	0.15196	0.15371	0.14481
			364.01	0.16895	0.176	0.18154	0.17584	0.18529	0.17756	0.1689	0.17057	0.16265	0.16283	0.15629	0.1519	0.1543	0.14457
			363.234	0.16896	0.1766	0.18084	0.17597	0.18584	0.17787	0.16873	0.16976	0.16276	0.16197	0.15554	0.15206	0.15334	0.14514
			362.496	0.1694	0.17671	0.18106	0.17611	0.18664	0.17812	0.16876	0.16969	0.16248	0.16212	0.15533	0.15203	0.15256	0.14546
			361.758	0.17022	0.1776	0.18186	0.17682	0.18675	0.17844	0.16916	0.17022	0.16285	0.16237	0.15578	0.15221	0.1533	0.14534
			360.981	0.17072	0.17809	0.18232	0.17717	0.18732	0.17871	0.16929	0.17029	0.16288	0.16245	0.15573	0.15223	0.15296	0.14545
			360.242	0.17157	0.17866	0.18346	0.17799	0.18765	0.17911	0.16971	0.17104	0.16305	0.16297	0.15631	0.15228	0.15372	0.14519
			359.504	0.17247	0.1796	0.18436	0.17865	0.18778	0.17944	0.17025	0.17149	0.16356	0.16322	0.1567	0.15251	0.15439	0.14507
			358.766	0.17256	0.1802	0.18394	0.1788	0.18857	0.1799	0.17021	0.17082	0.1635	0.16276	0.15605	0.15266	0.15325	0.14576
			357.988	0.17334	0.18046	0.18478	0.17924	0.18904	0.18016	0.17036	0.17117	0.16354	0.16312	0.15627	0.15265	0.15325	0.14576
			357.25	0.17397	0.18131	0.1856	0.17987	0.18918	0.18048	0.17068	0.17156	0.16381	0.16328	0.15648	0.15272	0.15391	0.14556
			356.511	0.17463	0.18186	0.18612	0.18034	0.18974	0.18078	0.17092	0.17178	0.16397	0.16353	0.15653	0.15285	0.15382	0.14574
			355.734	0.17535	0.18255	0.18689	0.18085	0.1901	0.18113	0.17119	0.17213	0.16423	0.1638	0.15692	0.15296	0.15403	0.14575
			354.995	0.17577	0.1832	0.18712	0.18128	0.19049	0.18138	0.17145	0.17207	0.16439	0.16364	0.15677	0.15297	0.15366	0.1459
			354.256	0.17632	0.18374	0.18771	0.18174	0.19107	0.18179	0.17165	0.17227	0.16433	0.16375	0.15683	0.15307	0.15392	0.14593
			353.517	0.17717	0.1843	0.18863	0.18238	0.1913	0.18211	0.17205	0.1726	0.1647	0.16399	0.1571	0.15321	0.15432	0.14601
			352.739	0.17797	0.1852	0.18938	0.18284	0.1919	0.1825	0.17229	0.17296	0.1649	0.16421	0.15731	0.15337	0.15441	0.1461
			352	0.17843	0.1857	0.18988	0.18339	0.19221	0.18268	0.17246	0.17305	0.16504	0.16426	0.15737	0.15343	0.15442	0.14606
			351.261	0.17924	0.18644	0.19045	0.18392	0.19264	0.18301	0.17281	0.17326	0.16523	0.16448	0.15753	0.15357	0.15445	0.14632
			350.483	0.1798	0.18686	0.19092	0.18432	0.19297	0.18338	0.173	0.1735	0.16528	0.16448	0.15752	0.15352	0.15434	0.1463
			349.744	0.18033	0.18762	0.19178	0.18486	0.19346	0.18374	0.17314	0.17369	0.16548	0.16478	0.15771	0.15376	0.15458	0.14636
			349.004	0.18113	0.1882	0.19242	0.18541	0.19378	0.18395	0.17352	0.17404	0.16567	0.16486	0.15792	0.15388	0.15484	0.14626
			348.265	0.18182	0.18889	0.19312	0.18595	0.19407	0.18429	0.17373	0.17431	0.1659	0.16499	0.15818	0.15383	0.15506	0.14618
			347.486	0.18241	0.18955	0.19353	0.18644	0.19457	0.18474	0.174	0.1744	0.16597	0.16515	0.15823	0.15384	0.15498	0.14639
			346.747	0.18304	0.19017	0.19411	0.18704	0.19491	0.18497	0.17421	0.17463	0.16614	0.16518	0.15822	0.15397	0.15522	0.14646
			346.007	0.18364	0.1908	0.19456	0.18741	0.19549	0.18531	0.17444	0.17472	0.16631	0.1653	0.15815	0.15428	0.15502	0.14682
			345.267	0.18414	0.19134	0.19481	0.18769	0.19579	0.18552	0.17441	0.17454	0.16633	0.16523	0.15807	0.15416	0.15477	0.14688
			344.488	0.18481	0.19188	0.19569	0.18827	0.19617	0.18573	0.17469	0.1749	0.16639	0.16537	0.1583	0.15426	0.15493	0.14678
			343.749	0.18569	0.19271	0.1966	0.18893	0.19674	0.18629	0.17513	0.17529	0.16676	0.16582	0.15865	0.15435	0.15529	0.14695
			343.009	0.18613	0.19321	0.19679	0.18922	0.19701	0.18648	0.17522	0.17535	0.16686	0.16574	0.15851	0.15444	0.15524	0.14692
			342.268	0.18683	0.19374	0.19763	0.18971	0.19745	0.18672	0.1755	0.17548	0.16692	0.16598	0.15866	0.1546	0.1553	0.14704
			341.489	0.18758	0.19459	0.19838	0.19037	0.19795	0.18718	0.1759	0.17601	0.16725	0.16625	0.159	0.15475	0.15548	0.14706
			340.749	0.18832	0.19508	0.19906	0.19081	0.19801	0.1874	0.17592	0.17609	0.16723	0.16621	0.15903	0.15471	0.15566	0.14706
			340.009	0.18882	0.19582	0.19941	0.1912	0.19852	0.18779	0.17625	0.17614	0.16749	0.16628	0.15916	0.15481	0.15572	0.14717
			339.268	0.18926	0.19632	0.19968	0.19161	0.19896	0.18785	0.17634	0.17621	0.16752	0.16626	0.15913	0.15493	0.15537	0.14718
			338.489	0.19008	0.19694	0.20056	0.19216	0.19933	0.18824	0.1766	0.17644	0.16776	0.1665	0.15933	0.15501	0.15558	0.14724
			337.748	0.19083	0.1976	0.20122	0.19269	0.19969	0.18854	0.17694	0.17685	0.16792	0.16673	0.15945	0.1551	0.15581	0.1474
			337.008	0.19148	0.19832	0.20178	0.19322	0.20016	0.18892	0.17721	0.17687	0.16813	0.16685	0.1596	0.1551	0.1561	0.14739
			336.267	0.19188	0.19881	0.20227	0.19362	0.20041	0.18909	0.17727	0.17703	0.16821	0.16686	0.15954	0.1552	0.15593	0.14743
			335.488	0.19277	0.19945	0.20301	0.19416	0.20082	0.18945	0.17769	0.17739	0.16846	0.1671	0.15999	0.15535	0.1565	0.14742
			334.747	0.19331	0.20012	0.20341	0.19467	0.20121	0.18975	0.17784	0.17739	0.16856	0.16718	0.15997	0.15544	0.15633	0.14753
			334.006	0.19376	0.2007	0.20367	0.19494	0.20163	0.18992	0.17795	0.17742	0.16852	0.16699	0.1597	0.1555	0.1561	0.14785
			333.265	0.19449	0.20119	0.20438	0.19546	0.20204	0.19027	0.17809	0.17753	0.16875	0.16723	0.15985	0.15555	0.15612	0.14788
			332.485	0.19516	0.20204	0.2051	0.19597	0.20237	0.19076	0.17841	0.17796	0.16898	0.16747	0.16008	0.15564	0.15647	0.1478
			331.744	0.19581	0.20261	0.20567	0.19643	0.20276	0.19092	0.17872	0.1781	0.1691	0.16756	0.16023	0.15571	0.15656	0.14799
			331.002	0.19655	0.20322	0.20636	0.19698	0.20323	0.19104	0.1789	0.17835	0.16927	0.16775	0.16043	0.15579	0.15685	0.14799
			330.261	0.19699	0.20393	0.20685	0.19737	0.2035	0.19135	0.17903	0.17844	0.16937	0.16769	0.16037	0.15589	0.15663	0.14799
			329.481	0.19786	0.20442	0.20754	0.1979	0.204	0.19168	0.17929	0.17866	0.16962	0.16804	0.16061	0.15586	0.15689	0.14807
			328.74	0.19848	0.20512	0.2084	0.19842	0.20425	0.19201	0.17954	0.17907	0.16973	0.16818	0.16088	0.15593	0.15711	0.14801
			327.998	0.19919	0.20578	0.20888	0.19902	0.20448	0.19224	0.17973	0.17924	0.16999	0.16818	0.16092	0.15607	0.15744	0.14811
			327.257	0.19947	0.2063	0.20897	0.1991	0.20505	0.19253	0.17976	0.17904	0.16995	0.16801	0.16067	0.1561	0.15694	0.1484
			326.515	0.20057	0.20708	0.21015	0.2	0.20549	0.19297	0.18028	0.17959	0.17024	0.16863	0.16121	0.15631	0.15735	0.14839
			325.734	0.20121	0.20783	0.21077	0.20044	0.20565	0.19317	0.18048	0.17978	0.17042	0.16867	0.16134	0.15629	0.15783	0.14818
			324.992	0.20164	0.20851	0.21052	0.20071	0.20626	0.1935	0.1805	0.17936	0.17055	0.16834	0.16092	0.15654	0.15708	0.14884
			324.251	0.20208	0.20889	0.21107	0.20105	0.20676	0.19365	0.18066	0.17945	0.17052	0.16838	0.16084	0.15664	0.15686	0.14899
			323.509	0.20284	0.20945	0.21191	0.20156	0.20701	0.1939	0.18092	0.17981	0.17075	0.16868	0.1611	0.15653	0.15716	0.14886
			322.767	0.20371	0.21022	0.21283	0.2022	0.20724	0.19437	0.18123	0.18017	0.17098	0.16891	0.16138	0.15682	0.15755	0.1489
			321.986	0.20429	0.2109	0.21355	0.20275	0.20773	0.19456	0.18149	0.18055	0.17116	0.16923	0.16178	0.15683	0.15795	0.14894
			321.244	0.20506	0.21156	0.21432	0.20323	0.20791	0.19482	0.18177	0.1808	0.17134	0.1694	0.16196	0.15683	0.15818	0.14875
			320.501	0.20551	0.21216	0.21437	0.20362	0.20818	0.19506	0.18179	0.18066	0.17147	0.1691	0.16178	0.15691	0.15794	0.14909
			319.759	0.20601	0.21269	0.21471	0.2039	0.20885	0.19529	0.18183	0.18062	0.17133	0.16926	0.16164	0.15695	0.15759	0.14928
			319.017	0.20687	0.2135	0.21579	0.2045	0.20919	0.19569	0.18234	0.18103	0.17169	0.16954	0.16192	0.15713	0.15806	0.14923
			318.235	0.20769	0.21413	0.21651	0.20509	0.20958	0.19595	0.18254	0.18133	0.17197	0.16961	0.16206	0.15717	0.15821	0.14934
			317.493	0.20851	0.21492	0.21728	0.20578	0.20994	0.19638	0.18285	0.18179	0.17214	0.17011	0.16252	0.15735	0.1586	0.14933
			316.75	0.20926	0.21554	0.21822	0.20628	0.21022	0.19662	0.18315	0.18216	0.17232	0.17037	0.16281	0.15732	0.15913	0.14918
			316.008	0.20954	0.21628	0.21784	0.20658	0.21057	0.19683	0.18314	0.18168	0.17251	0.16986	0.16227	0.15762	0.15852	0.14985
			315.265	0.21012	0.21668	0.21835	0.20679	0.21126	0.19705	0.18324	0.18162	0.17234	0.16986	0.16217	0.1576	0.15811	0.15003
			314.483	0.21098	0.21735	0.21953	0.20753	0.21161	0.19747	0.18361	0.18219	0.17261	0.17027	0.16263	0.15762	0.15858	0.14983
			313.74	0.21179	0.21802	0.22035	0.20801	0.21185	0.19771	0.18393	0.18253	0.17294	0.17058	0.16296	0.15774	0.15902	0.14975
			312.997	0.21215	0.21853	0.22058	0.2084	0.21202	0.19783	0.18396	0.18249	0.17294	0.17048	0.16278	0.15775	0.15887	0.14983
			312.255	0.21279	0.21918	0.22107	0.20879	0.21248	0.19816	0.18414	0.1826	0.17303	0.17061	0.16286	0.15783	0.15872	0.14997
			311.511	0.21365	0.21989	0.22173	0.20926	0.21284	0.19846	0.1844	0.18277	0.17321	0.17074	0.16304	0.15802	0.15909	0.15011
			310.768	0.21406	0.22034	0.22216	0.20961	0.2132	0.19865	0.18455	0.18296	0.17324	0.17087	0.16307	0.158	0.15909	0.1501
			309.986	0.21468	0.22106	0.22253	0.21009	0.21337	0.19884	0.18472	0.18297	0.17341	0.17075	0.16302	0.15804	0.15909	0.15017
			309.243	0.21517	0.22161	0.22281	0.2104	0.21403	0.19911	0.18484	0.18293	0.17344	0.17076	0.16307	0.15816	0.15889	0.15047
			308.5	0.21591	0.22222	0.22366	0.21096	0.21437	0.19943	0.18509	0.18334	0.17355	0.17107	0.16334	0.15835	0.15909	0.15041
			307.756	0.21681	0.22303	0.2246	0.21154	0.21443	0.19966	0.18542	0.18374	0.17391	0.17128	0.16354	0.15833	0.15972	0.15035
			307.013	0.21723	0.22355	0.22485	0.21187	0.21494	0.19988	0.18548	0.18355	0.1738	0.17126	0.16343	0.15838	0.15936	0.15048
			306.269	0.21787	0.22405	0.22553	0.21235	0.21527	0.20018	0.18576	0.18381	0.17397	0.17143	0.1636	0.15846	0.15961	0.15047
			305.487	0.21854	0.22475	0.22613	0.2128	0.21555	0.20043	0.1859	0.18402	0.17415	0.17149	0.16365	0.15851	0.15962	0.1504
			304.743	0.21926	0.22537	0.22674	0.21327	0.21593	0.2007	0.18605	0.18425	0.17427	0.17163	0.16383	0.15863	0.15966	0.15063
			303.999	0.22003	0.22594	0.22766	0.21373	0.21624	0.20096	0.1864	0.18466	0.1744	0.17198	0.16421	0.15868	0.16022	0.15038
			303.256	0.22052	0.22677	0.22788	0.21418	0.21654	0.20119	0.1865	0.18453	0.17459	0.17175	0.164	0.1588	0.1601	0.15055
			302.512	0.22097	0.22716	0.22811	0.21444	0.21701	0.20132	0.18649	0.18449	0.17443	0.17181	0.16388	0.15877	0.15975	0.1506
			301.768	0.22182	0.22789	0.22886	0.21498	0.21724	0.20164	0.18683	0.18476	0.17467	0.17206	0.16407	0.1589	0.15998	0.15063
			300.985	0.2227	0.22866	0.22965	0.2156	0.2177	0.20208	0.18715	0.18511	0.17502	0.17223	0.16435	0.15912	0.16024	0.15068
			300.241	0.22325	0.22925	0.2303	0.21601	0.21803	0.20229	0.18733	0.18524	0.17504	0.17235	0.16449	0.15913	0.16034	0.15068
			299.497	0.22397	0.22976	0.23101	0.21645	0.21831	0.20246	0.18749	0.18554	0.1751	0.17245	0.16464	0.15914	0.16053	0.15059
			298.753	0.22457	0.23046	0.23143	0.21687	0.21844	0.20266	0.18763	0.18556	0.17526	0.17248	0.16472	0.15919	0.16064	0.15064
			298.008	0.22489	0.23097	0.23137	0.21708	0.21884	0.20282	0.18763	0.1853	0.17533	0.17219	0.16436	0.15928	0.16025	0.15088
			297.264	0.22541	0.23158	0.23189	0.21742	0.21947	0.20311	0.18783	0.18545	0.17531	0.17242	0.16437	0.1593	0.16009	0.1511
			296.481	0.22639	0.2322	0.23287	0.21802	0.21958	0.2033	0.18807	0.18589	0.17536	0.17268	0.16475	0.15925	0.16055	0.15079
			295.736	0.22691	0.23295	0.23319	0.21842	0.21983	0.20357	0.18824	0.18589	0.17565	0.17256	0.16468	0.1594	0.16043	0.15096
			294.992	0.22752	0.23354	0.2335	0.21876	0.22053	0.20385	0.1883	0.18578	0.17562	0.17247	0.16446	0.15952	0.16021	0.15135
			294.247	0.22804	0.23398	0.23423	0.21926	0.22081	0.20403	0.18842	0.186	0.1757	0.17272	0.16463	0.15952	0.16017	0.15121
			293.502	0.22887	0.23461	0.23526	0.21978	0.22094	0.20441	0.18883	0.1865	0.17589	0.17312	0.165	0.1595	0.16079	0.15096
			292.758	0.2296	0.23535	0.23598	0.22021	0.22122	0.20461	0.18902	0.18669	0.17606	0.17322	0.16517	0.15963	0.16077	0.15086
			292.013	0.23013	0.23591	0.23625	0.22067	0.22145	0.20486	0.18911	0.18666	0.17612	0.17307	0.16515	0.15968	0.16103	0.15091
			291.268	0.23042	0.23649	0.23621	0.22089	0.22195	0.205	0.18907	0.18632	0.1761	0.17281	0.16472	0.15973	0.1602	0.15133
			290.484	0.23121	0.23697	0.23711	0.22133	0.22232	0.20527	0.18933	0.18672	0.17623	0.17312	0.16501	0.15982	0.1606	0.15125
			289.739	0.23164	0.23754	0.23758	0.22162	0.22248	0.20537	0.18937	0.18672	0.1763	0.17311	0.16504	0.15975	0.16052	0.15109
			288.994	0.23271	0.23821	0.23875	0.22227	0.22293	0.20575	0.18979	0.18742	0.17656	0.17372	0.16553	0.1599	0.16105	0.15105
			288.249	0.23333	0.23903	0.23929	0.22278	0.22297	0.20601	0.18994	0.18747	0.17671	0.17366	0.1656	0.15994	0.16152	0.15089
			287.504	0.23374	0.23944	0.23934	0.22302	0.22347	0.20615	0.19	0.18725	0.1767	0.17349	0.16527	0.16002	0.16097	0.15133
			286.759	0.23422	0.24002	0.2396	0.22332	0.22383	0.20641	0.19009	0.18737	0.1767	0.17355	0.16523	0.16004	0.16079	0.15139
			286.014	0.23495	0.24058	0.24039	0.22373	0.22397	0.20656	0.19028	0.18747	0.17677	0.17355	0.16549	0.16	0.1611	0.15116
			285.268	0.23531	0.24112	0.24058	0.22407	0.22451	0.20683	0.1904	0.18751	0.17687	0.17356	0.16534	0.16016	0.16082	0.15137
			284.484	0.23628	0.24163	0.24179	0.22463	0.22469	0.20702	0.19063	0.18817	0.17696	0.17415	0.16593	0.1601	0.16144	0.15092
			283.738	0.2368	0.24248	0.24214	0.22507	0.22461	0.20717	0.19078	0.18808	0.17719	0.17393	0.16585	0.16014	0.16184	0.15101
			282.993	0.23707	0.24273	0.24192	0.22514	0.22516	0.20729	0.19073	0.18776	0.17703	0.17372	0.16545	0.16015	0.16107	0.15132
			282.247	0.23761	0.24334	0.24245	0.22551	0.22549	0.20752	0.19083	0.18788	0.17708	0.17369	0.16547	0.16024	0.16108	0.15131
			281.502	0.23821	0.24381	0.2431	0.22593	0.22576	0.20769	0.191	0.18811	0.17718	0.17392	0.16564	0.16024	0.16121	0.15122
			280.756	0.23862	0.24414	0.24339	0.22607	0.22576	0.20772	0.19094	0.18807	0.17711	0.17372	0.16551	0.16008	0.16112	0.15109
			280.01	0.23926	0.24472	0.2441	0.22646	0.226	0.20797	0.19105	0.18828	0.17725	0.17393	0.16578	0.16011	0.16135	0.15104
			279.265	0.23983	0.24518	0.24463	0.22679	0.22618	0.20801	0.19124	0.18844	0.1773	0.17406	0.16586	0.16023	0.1616	0.15093
			278.519	0.24044	0.24592	0.24527	0.22737	0.2266	0.20845	0.1916	0.1887	0.17755	0.17434	0.16598	0.1603	0.16159	0.15107
			277.734	0.24082	0.24628	0.24546	0.22749	0.22683	0.20852	0.19156	0.18861	0.17752	0.17416	0.16578	0.16027	0.16125	0.15108
			276.988	0.2414	0.24686	0.24582	0.22794	0.22704	0.2087	0.19169	0.18861	0.1776	0.17408	0.1658	0.16027	0.16146	0.15129
			276.242	0.24172	0.24732	0.24625	0.22813	0.22755	0.20891	0.19173	0.18868	0.17763	0.17426	0.1658	0.16039	0.16111	0.1514
			275.495	0.2424	0.24767	0.24696	0.22845	0.22743	0.2089	0.19189	0.1889	0.17765	0.17435	0.16595	0.16022	0.16145	0.15102
			274.749	0.24307	0.24836	0.24776	0.22902	0.22773	0.20926	0.19218	0.18921	0.17788	0.17456	0.16623	0.16042	0.16179	0.15099
			274.003	0.24347	0.24869	0.248	0.22922	0.22796	0.20938	0.19216	0.18924	0.17777	0.17454	0.16611	0.16039	0.1616	0.15107
			273.257	0.24413	0.24913	0.24871	0.22951	0.22824	0.20954	0.1923	0.18956	0.17779	0.17495	0.1666	0.16035	0.16193	0.15079
			272.51	0.24438	0.24988	0.24844	0.22982	0.22785	0.20955	0.19228	0.18902	0.17791	0.17419	0.16593	0.1604	0.16207	0.15078
			271.764	0.24425	0.24995	0.24773	0.22956	0.22901	0.20969	0.19188	0.18831	0.17748	0.17377	0.1651	0.16023	0.16023	0.15161
			271.018	0.24523	0.25053	0.24928	0.23028	0.2289	0.20995	0.19241	0.18923	0.17778	0.17451	0.16589	0.16034	0.16137	0.1512
			270.232	0.24586	0.25109	0.24993	0.23065	0.229	0.21008	0.1926	0.18935	0.17797	0.17455	0.16604	0.16043	0.16162	0.15093
			269.485	0.24612	0.25137	0.25008	0.23076	0.22896	0.21002	0.19246	0.18921	0.17779	0.17442	0.16598	0.16025	0.16155	0.15082
			268.739	0.2468	0.25191	0.25065	0.23116	0.22944	0.21037	0.19274	0.18964	0.17799	0.17473	0.16623	0.16044	0.16167	0.15096
			267.992	0.24724	0.25227	0.25114	0.23149	0.22934	0.21038	0.19285	0.18956	0.17797	0.17465	0.16619	0.16026	0.16195	0.15068
			267.245	0.24733	0.25274	0.25069	0.23154	0.22972	0.21049	0.19263	0.18919	0.17782	0.17414	0.16565	0.16035	0.16119	0.15097
			266.498	0.24784	0.25306	0.25131	0.23176	0.23004	0.21061	0.19275	0.18928	0.17788	0.17435	0.16584	0.16032	0.16128	0.15091
			265.752	0.24827	0.25333	0.25187	0.23195	0.22989	0.21056	0.19277	0.18942	0.17778	0.1744	0.16587	0.16014	0.16133	0.15054
			265.005	0.24886	0.25382	0.25245	0.23226	0.22997	0.21069	0.19284	0.18961	0.1778	0.17453	0.1661	0.16004	0.16164	0.15032
			264.258	0.24922	0.2541	0.2527	0.23252	0.23	0.21073	0.1929	0.18961	0.17783	0.17444	0.16593	0.16007	0.16162	0.15032
			263.511	0.24964	0.25462	0.25311	0.23281	0.23047	0.21098	0.19299	0.18972	0.17794	0.17452	0.166	0.16016	0.16152	0.1505
			262.763	0.25017	0.25484	0.25386	0.2331	0.23061	0.21107	0.19316	0.19006	0.17795	0.17477	0.16638	0.16008	0.16169	0.15027
			262.016	0.25083	0.25525	0.25462	0.23345	0.23039	0.21118	0.19334	0.19047	0.17802	0.17503	0.16667	0.16004	0.16226	0.14996
			261.269	0.25063	0.25564	0.25385	0.23334	0.23037	0.21103	0.19304	0.18959	0.17784	0.17423	0.16592	0.15995	0.16159	0.15004
			260.483	0.2505	0.25583	0.25303	0.23313	0.23092	0.21107	0.1928	0.18895	0.17759	0.17371	0.1651	0.15991	0.16046	0.15052
			259.735	0.25097	0.25608	0.25331	0.23335	0.23116	0.21109	0.19271	0.18898	0.17743	0.17381	0.16512	0.15986	0.16034	0.15059
			258.988	0.25151	0.25651	0.25426	0.23371	0.2312	0.2113	0.19299	0.18944	0.1776	0.17417	0.16552	0.15992	0.16108	0.15034
			258.24	0.25191	0.25695	0.25442	0.234	0.23142	0.21145	0.1932	0.18951	0.17786	0.1742	0.16557	0.16005	0.1611	0.15048
			257.493	0.2521	0.25702	0.25453	0.234	0.23127	0.2113	0.19298	0.18945	0.17757	0.17404	0.1655	0.15982	0.16101	0.15032
			256.745	0.25247	0.25737	0.2551	0.23434	0.23142	0.21147	0.19325	0.18973	0.17771	0.17431	0.16579	0.15997	0.1613	0.1503
			255.998	0.25286	0.25769	0.25555	0.23452	0.23153	0.21158	0.19334	0.18993	0.17781	0.17451	0.16592	0.16003	0.16145	0.15026
			255.25	0.25324	0.25795	0.25589	0.23469	0.23165	0.21169	0.19345	0.19005	0.1778	0.17455	0.16607	0.16001	0.16172	0.15031
			254.502	0.25384	0.25844	0.25678	0.23516	0.23194	0.21197	0.19381	0.19067	0.17811	0.17521	0.16678	0.16031	0.16225	0.15048
			253.755	0.25415	0.25861	0.25698	0.2353	0.23166	0.21191	0.19381	0.19055	0.17817	0.17508	0.1667	0.16029	0.16253	0.1503
			253.007	0.25396	0.25891	0.25614	0.2352	0.23183	0.21193	0.19358	0.18997	0.17807	0.17452	0.16607	0.16031	0.16183	0.1507
			252.259	0.25408	0.25902	0.256	0.23523	0.23233	0.21204	0.19353	0.18986	0.17795	0.17456	0.16594	0.16036	0.16142	0.1511
			251.511	0.25445	0.25927	0.25686	0.23558	0.23237	0.21215	0.1938	0.19035	0.17814	0.17486	0.16643	0.16043	0.16206	0.15099
			250.763	0.25505	0.25958	0.25766	0.23585	0.23242	0.21231	0.1941	0.19089	0.17839	0.17543	0.16701	0.16072	0.16278	0.15111
			250.015	0.2554	0.25985	0.25806	0.23616	0.23238	0.2125	0.19436	0.19123	0.17858	0.17575	0.16737	0.16098	0.16341	0.15133
			249.267	0.2554	0.26002	0.25803	0.23618	0.23251	0.21248	0.19432	0.19122	0.17857	0.17571	0.16741	0.16104	0.16341	0.15144
			248.519	0.2556	0.26007	0.25813	0.2362	0.23238	0.21244	0.1943	0.19118	0.17863	0.1757	0.16749	0.16113	0.16371	0.15162
			247.731	0.25534	0.26034	0.25715	0.23606	0.23235	0.21238	0.19415	0.19051	0.17861	0.17519	0.16688	0.16128	0.16318	0.15215
			246.983	0.25522	0.26054	0.25653	0.23603	0.23327	0.21259	0.19402	0.19009	0.1785	0.17501	0.16651	0.16157	0.16246	0.15304
			246.235	0.2557	0.26078	0.25725	0.23638	0.23351	0.2129	0.19449	0.19089	0.17893	0.17579	0.16738	0.16199	0.16351	0.15358
			245.486	0.25623	0.26107	0.25831	0.23681	0.23354	0.21329	0.19499	0.19169	0.17951	0.17662	0.16836	0.16264	0.16478	0.15407
			244.738	0.25672	0.2613	0.25925	0.23726	0.23371	0.21369	0.19564	0.19282	0.1802	0.17766	0.16956	0.1633	0.16629	0.15476
			243.989	0.25693	0.26152	0.25948	0.23747	0.23361	0.21386	0.19587	0.19313	0.18052	0.17797	0.17002	0.1638	0.16718	0.15537
			243.241	0.25675	0.26183	0.25876	0.23745	0.23383	0.21398	0.19587	0.19272	0.18071	0.17783	0.16986	0.16436	0.16724	0.15647
			242.492	0.25665	0.26201	0.25821	0.23746	0.23458	0.21434	0.19616	0.19275	0.18113	0.17827	0.17012	0.1652	0.1674	0.15809
			241.744	0.25679	0.26224	0.2584	0.23772	0.2349	0.21473	0.19662	0.19341	0.18163	0.17893	0.17088	0.1661	0.1685	0.15945
			240.995	0.25724	0.26261	0.25913	0.23829	0.23545	0.21544	0.19748	0.19444	0.18279	0.18017	0.17237	0.16751	0.17035	0.16132
			240.246	0.25749	0.26292	0.25971	0.23871	0.23592	0.21607	0.19836	0.19551	0.18379	0.18154	0.17377	0.16894	0.1724	0.16325
			239.497	0.2579	0.26329	0.26035	0.23931	0.23651	0.21689	0.19935	0.19686	0.18513	0.18296	0.17561	0.17072	0.17489	0.16583
			238.749	0.25799	0.26361	0.26046	0.23975	0.23685	0.21774	0.20024	0.19787	0.18645	0.18427	0.17715	0.17261	0.17724	0.16855
			238	0.25829	0.2637	0.26122	0.24023	0.23787	0.2186	0.20149	0.1995	0.18796	0.18647	0.17944	0.17479	0.18011	0.17181
			237.251	0.25875	0.26448	0.26187	0.24121	0.2386	0.2199	0.20302	0.2013	0.19016	0.18858	0.18193	0.17763	0.18404	0.17573
			236.502	0.25883	0.26489	0.26195	0.2417	0.23995	0.22124	0.20434	0.20279	0.19193	0.19075	0.18432	0.1803	0.18681	0.18025
			235.753	0.25951	0.26545	0.26335	0.24299	0.24118	0.22294	0.20658	0.20568	0.19477	0.19418	0.18813	0.18448	0.1922	0.18588
			235.004	0.25983	0.2662	0.26389	0.24399	0.24251	0.22479	0.20863	0.20791	0.19785	0.1972	0.19158	0.18856	0.19704	0.19182
			234.254	0.26025	0.26704	0.26441	0.24517	0.2446	0.22686	0.21096	0.21062	0.20113	0.20078	0.19542	0.19333	0.20237	0.19862
			233.505	0.26122	0.26814	0.26647	0.24713	0.24703	0.23012	0.21482	0.21549	0.20583	0.20639	0.20173	0.19968	0.21048	0.20768
			232.756	0.26227	0.26944	0.26848	0.24924	0.24918	0.23318	0.21847	0.21992	0.21075	0.2119	0.20821	0.20654	0.21956	0.21721
			232.007	0.26283	0.27082	0.2693	0.25109	0.25166	0.23622	0.22199	0.22388	0.21564	0.21723	0.21395	0.21338	0.22755	0.22696
			231.257	0.26419	0.2722	0.27163	0.25366	0.2555	0.2402	0.22665	0.22967	0.22193	0.22434	0.22174	0.22209	0.23762	0.23955
			230.508	0.26569	0.27419	0.27425	0.2568	0.25876	0.24506	0.2325	0.23624	0.22928	0.23233	0.23088	0.23158	0.25091	0.25367
			229.758	0.26677	0.27612	0.27512	0.2594	0.26247	0.24927	0.23733	0.24095	0.23552	0.23911	0.23812	0.2406	0.26042	0.26645
			229.009	0.26787	0.27794	0.27668	0.26205	0.26662	0.2539	0.24221	0.24632	0.24216	0.24602	0.2462	0.25023	0.27037	0.28037
			228.259	0.27	0.28078	0.27981	0.2662	0.272	0.26009	0.24961	0.25533	0.25201	0.25684	0.25804	0.26309	0.28643	0.2984
			227.51	0.27316	0.28415	0.28457	0.27158	0.27813	0.26802	0.25859	0.26518	0.26342	0.26989	0.27202	0.27828	0.3051	0.31965
			226.76	0.27671	0.28872	0.29005	0.27826	0.28556	0.2778	0.26967	0.27866	0.27761	0.28481	0.28928	0.29735	0.32811	0.34451
			226.01	0.28105	0.29378	0.29574	0.28504	0.29444	0.28783	0.28118	0.29207	0.29218	0.30055	0.30756	0.31602	0.35316	0.3739

## Sheet: Figure 3D
				Metal Concentration	DAbs @550 nm		Metal Concentration	DAbs @550 nm		Metal Concentration	DAbs @550 nm		Metal Concentration	DAbs @550 nm		Metal Concentration	DAbs @550 nm
				µM	Pb (II)		µM	Co(II)		µM	Hg(II)		µM	Mn(II)		µM	Cd(II)
				0	0		0	0		0	0		0	0		0	0
				9.86482	0.11101		10.5464	0.06823		10.0848	0.10906		10.65	0.02419		9.43013	0.07197
				19.5362	0.41778		20.8859	0.21046		19.9719	0.16737		21.0913	0.19346		18.6754	0.17342
				38.321	0.78959		40.9686	0.48427		39.1756	0.30729		41.3713	0.36561		36.6324	0.24459
				56.397	1.14856		60.2933	0.78495		57.6547	0.43802		60.8861	0.61861		53.9119	0.50562
				73.8035	1.42162		78.9024	0.97289		75.4494	0.5396		79.6781	0.87168		70.5514	0.6571
				90.577	1.69555		96.8347	1.07747		92.597	0.671		97.7868	1.08381		86.5858	0.84313
				106.751	1.87065		114.127	1.24417		109.132	0.78489		115.249	1.24946		102.048	1.02372
				122.358	2.0757		130.812	1.4819		125.087	0.93317		132.098	1.35536		116.967	1.15964
				137.427	2.22905		146.922	1.36285		140.492	0.92941		148.366	1.45111		131.372	1.31113
				151.985	2.3663		162.485	1.44055		155.375	1.0124		164.083	1.58315		145.288	1.39182
				166.058	2.39733		177.53	1.50536		169.761	1.06128		179.276	1.6076		158.741	1.46998
				199.269	2.59194		213.036	1.52916		203.713	1.11758		215.131	1.70696		190.489	1.58757
				229.926	2.52878		245.811	1.48222		235.054	1.15022		248.228	1.7585		219.795	1.66989

## Sheet: Figure 3E
						RB			CV			NTP			BT			DNA
					Raman shift	Intensity		Raman shift	Intensity		Raman shift	Intensity		Raman shift	Intensity		Raman shift	Intensity
					cm-1	a.u.		cm-1	a.u.		cm-1	a.u.		cm-1	a.u.		cm-1	a.u.
					835.9	0.00151		600.228	1.11765		835.9	2.19576		835.9	3.28615		600.228	4.52357
					837.248	0.00273		601.608	1.12039		837.248	2.2035		837.248	3.29085		601.608	4.48234
					838.596	0.00375		602.988	1.11437		838.596	2.21313		838.596	3.29526		602.988	4.4579
					839.944	0.00456		604.368	1.11225		839.944	2.22465		839.944	3.29937		604.368	4.45737
					841.292	0.00516		605.747	1.11394		841.292	2.23807		841.292	3.3032		605.747	4.51046
					842.639	0.00555		607.126	1.11301		842.639	2.25338		842.639	3.30674		607.126	4.54478
					843.987	0.0069		608.506	1.11242		843.987	2.27625		843.987	3.31405		608.506	4.54954
					845.334	0.00728		609.884	1.11502		845.334	2.29738		845.334	3.31273		609.884	4.52362
					846.681	0.0059		611.263	1.11966		846.681	2.31884		846.681	3.31742		611.263	4.51642
					848.028	0.00611		612.642	1.11615		848.028	2.33127		848.028	3.32645		612.642	4.53759
					849.374	0.00456		614.02	1.11564		849.374	2.33941		849.374	3.32415		614.02	4.50316
					850.721	0.00131		615.398	1.11829		850.721	2.33281		850.721	3.3127		615.398	4.49158
					852.067	0.00323		616.776	1.11547		852.067	2.32168		852.067	3.31072		616.776	4.48714
					853.413	0.00295		618.154	1.11352		853.413	2.30575		853.413	3.30917		618.154	4.51398
					854.758	0.00495		619.532	1.11575		854.758	2.29071		854.758	3.30285		619.532	4.55862
					856.103	0.00149		620.908	1.11644		856.103	2.28075		856.103	3.29831		620.908	4.63946
					857.449	0.00324		622.285	1.12123		857.449	2.26963		857.449	3.30075		622.285	4.67278
					858.794	0.00676		623.662	1.12361		858.794	2.25807		858.794	3.29892		623.662	4.74321
					860.138	0.00533		625.039	1.12414		860.138	2.25164		860.138	3.30465		625.039	4.84484
					861.483	0.00908		626.416	1.12062		861.483	2.24295		861.483	3.30326		626.416	4.87836
					862.828	0.01011		627.791	1.1153		862.828	2.23505		862.828	3.29963		627.791	4.8527
					864.173	0.00982		629.168	1.12233		864.173	2.2269		864.173	3.2895		629.168	4.78354
					865.516	0.01153		630.544	1.11342		865.516	2.22203		865.516	3.29599		630.544	4.66873
					866.861	0.00606		631.92	1.10728		866.861	2.22177		866.861	3.3023		631.92	4.61439
					868.205	0.00225		633.295	1.10338		868.205	2.21892		868.205	3.30263		633.295	4.52365
					869.548	-0.00014274		634.67	1.11205		869.548	2.22018		869.548	3.30835		634.67	4.49493
					870.892	0.000370995		636.046	1.11031		870.892	2.23008		870.892	3.31573		636.046	4.4317
					872.234	0.00231		637.42	1.10476		872.234	2.23821		872.234	3.30887		637.42	4.40071
					873.577	0.00057929		638.795	1.1049		873.577	2.245		873.577	3.29927		638.795	4.4145
					874.921	0.00262		640.17	1.1031		874.921	2.24679		874.921	3.29747		640.17	4.41606
					876.263	0.00238		641.544	1.10385		876.263	2.24873		876.263	3.2934		641.544	4.40957
					877.606	0.00171		642.918	1.109		877.606	2.25141		877.606	3.29284		642.918	4.40728
					878.947	3.18629e-05		644.291	1.09929		878.947	2.25127		878.947	3.29985		644.291	4.39306
					880.29	-0.00544		645.666	1.09944		880.29	2.2487		880.29	3.30959		645.666	4.4
					881.631	-0.00541		647.038	1.09286		881.631	2.23626		881.631	3.31678		647.038	4.3978
					882.973	-0.00108		648.412	1.09555		882.973	2.23265		882.973	3.31406		648.412	4.39324
					884.314	0.00297		649.785	1.09013		884.314	2.23494		884.314	3.31839		649.785	4.4007
					885.655	0.01058		651.158	1.08877		885.655	2.23382		885.655	3.31137		651.158	4.37266
					886.997	0.01201		652.53	1.09472		886.997	2.22536		886.997	3.30917		652.53	4.37526
					888.337	0.01388		653.903	1.10252		888.337	2.22218		888.337	3.31083		653.903	4.40301
					889.678	0.01079		655.275	1.10614		889.678	2.2224		889.678	3.30551		655.275	4.39414
					891.018	0.00829		656.648	1.11379		891.018	2.2215		891.018	3.31741		656.648	4.38878
					892.358	0.00535		658.019	1.11473		892.358	2.22092		892.358	3.31968		658.019	4.41171
					893.699	0.00402		659.39	1.11353		893.699	2.21735		893.699	3.31412		659.39	4.4107
					895.039	0.00283		660.763	1.11559		895.039	2.20888		895.039	3.31576		660.763	4.42969
					896.378	0.00173		662.133	1.11542		896.378	2.2116		896.378	3.30364		662.133	4.44531
					897.717	0.00353		663.504	1.11431		897.717	2.20896		897.717	3.3088		663.504	4.45943
					899.057	0.00652		664.876	1.1103		899.057	2.20933		899.057	3.30832		664.876	4.45482
					900.396	0.00416		666.246	1.12456		900.396	2.20739		900.396	3.30703		666.246	4.44508
					901.734	0.00242		667.616	1.1109		901.734	2.20791		901.734	3.30532		667.616	4.42184
					903.073	-0.00109		668.986	1.09914		903.073	2.20566		903.073	3.31323		668.986	4.4
					904.411	-0.00156		670.357	1.08318		904.411	2.20389		904.411	3.32495		670.357	4.38589
					905.751	0.00398		671.727	1.06839		905.751	2.20805		905.751	3.3288		671.727	4.40664
					907.088	0.00947		673.096	1.06133		907.088	2.2068		907.088	3.32658		673.096	4.40192
					908.426	0.01047		674.465	1.07002		908.426	2.20363		908.426	3.32159		674.465	4.41964
					909.764	0.01288		675.834	1.08325		909.764	2.20405		909.764	3.30834		675.834	4.40735
					911.101	0.01624		677.204	1.0902		911.101	2.20113		911.101	3.30898		677.204	4.38456
					912.438	0.01862		678.573	1.10176		912.438	2.20304		912.438	3.29748		678.573	4.40208
					913.775	0.01987		679.941	1.12425		913.775	2.20824		913.775	3.28819		679.941	4.42851
					915.112	0.01947		681.31	1.11567		915.112	2.20676		915.112	3.28852		681.31	4.40016
					916.449	0.01961		682.678	1.1163		916.449	2.20174		916.449	3.30231		682.678	4.44819
					917.786	0.01972		684.046	1.11204		917.786	2.20301		917.786	3.30684		684.046	4.49078
					919.122	0.02406		685.414	1.10989		919.122	2.20637		919.122	3.31632		685.414	4.54281
					920.458	0.02574		686.781	1.10629		920.458	2.20504		920.458	3.32		686.781	4.57827
					921.794	0.02658		688.149	1.1144		921.794	2.2071		921.794	3.31753		688.149	4.62408
					923.13	0.02905		689.516	1.11754		923.13	2.20857		923.13	3.30935		689.516	4.61706
					924.466	0.03161		690.883	1.11085		924.466	2.21194		924.466	3.31116		690.883	4.58739
					925.801	0.03429		692.25	1.10772		925.801	2.21411		925.801	3.30492		692.25	4.58712
					927.137	0.03695		693.616	1.11299		927.137	2.21782		927.137	3.301		693.616	4.56776
					928.47	0.03789		694.983	1.11266		928.47	2.21878		928.47	3.30585		694.983	4.53332
					929.805	0.03839		696.348	1.10944		929.805	2.21725		929.805	3.31521		696.348	4.56287
					931.14	0.03711		697.714	1.10608		931.14	2.21602		931.14	3.31341		697.714	4.54343
					932.475	0.03561		699.08	1.09557		932.475	2.21295		932.475	3.31872		699.08	4.52044
					933.809	0.03283		700.446	1.08886		933.809	2.21214		933.809	3.31715		700.446	4.48725
					935.142	0.03132		701.812	1.09766		935.142	2.21381		935.142	3.32134		701.812	4.4759
					936.476	0.02988		703.177	1.09669		936.476	2.21895		936.476	3.32006		703.177	4.45203
					937.81	0.02508		704.541	1.09419		937.81	2.22106		937.81	3.31655		704.541	4.4274
					939.144	0.0217		705.906	1.09508		939.144	2.22543		939.144	3.30866		705.906	4.39912
					940.477	0.01911		707.271	1.10571		940.477	2.22504		940.477	3.30375		707.271	4.3613
					941.81	0.02082		708.636	1.11567		941.81	2.22598		941.81	3.30242		708.636	4.37259
					943.143	0.02052		709.999	1.11368		943.143	2.22776		943.143	3.30855		709.999	4.38126
					944.475	0.01696		711.363	1.10708		944.475	2.22278		944.475	3.30609		711.363	4.35114
					945.808	0.01897		712.728	1.10353		945.808	2.21672		945.808	3.30662		712.728	4.36263
					947.14	0.01966		714.09	1.09717		947.14	2.20981		947.14	3.30568		714.09	4.38265
					948.472	0.01917		715.454	1.10265		948.472	2.2087		948.472	3.31008		715.454	4.40298
					949.805	0.01521		716.818	1.10597		949.805	2.21053		949.805	3.31704		716.818	4.41676
					951.135	0.00765		718.18	1.11052		951.135	2.20889		951.135	3.31176		718.18	4.44122
					952.468	0.00469		719.543	1.12375		952.468	2.21401		952.468	3.30972		719.543	4.43246
					953.798	-0.000228883		720.905	1.13271		953.798	2.21228		953.798	3.30971		720.905	4.44034
					955.13	0.00258		722.268	1.14808		955.13	2.21328		955.13	3.31479		722.268	4.51808
					956.46	0.00147		723.63	1.15526		956.46	2.2188		956.46	3.32233		723.63	4.52195
					957.792	0.000346554		724.992	1.1665		957.792	2.21585		957.792	3.32376		724.992	4.52802
					959.122	0.0045		726.354	1.17595		959.122	2.21804		959.122	3.32854		726.354	4.51624
					960.451	0.00543		727.716	1.17199		960.451	2.21316		960.451	3.33401		727.716	4.49521
					961.782	0.00647		729.077	1.16627		961.782	2.21467		961.782	3.33106		729.077	4.44202
					963.112	0.00771		730.439	1.15661		963.112	2.2091		963.112	3.33081		730.439	4.40445
					964.441	0.00522		731.799	1.15088		964.441	2.2114		964.441	3.323		731.799	4.38263
					965.771	0.00494		733.159	1.14163		965.771	2.20791		965.771	3.31335		733.159	4.37728
					967.1	0.0051		734.521	1.12342		967.1	2.2032		967.1	3.29843		734.521	4.37881
					968.429	0.00952		735.88	1.12071		968.429	2.20528		968.429	3.29454		735.88	4.42201
					969.759	0.01214		737.242	1.11943		969.759	2.21144		969.759	3.28721		737.242	4.40573
					971.087	0.01658		738.601	1.12027		971.087	2.21218		971.087	3.29035		738.601	4.39758
					972.416	0.01832		739.96	1.11651		972.416	2.21937		972.416	3.29523		739.96	4.40636
					973.745	0.01575		741.32	1.1161		973.745	2.21848		973.745	3.30243		741.32	4.399
					975.073	0.01432		742.68	1.10359		975.073	2.2201		975.073	3.29298		742.68	4.40721
					976.401	0.01513		744.039	1.09635		976.401	2.2158		976.401	3.29617		744.039	4.39553
					977.728	0.01132		745.397	1.10503		977.728	2.2132		977.728	3.30088		745.397	4.41717
					979.056	0.00612		746.756	1.10388		979.056	2.2042		979.056	3.30619		746.756	4.42805
					980.383	0.00659		748.116	1.10623		980.383	2.20078		980.383	3.31078		748.116	4.4371
					981.711	0.00162		749.474	1.11377		981.711	2.20266		981.711	3.31148		749.474	4.4541
					983.038	0.00192		750.832	1.12224		983.038	2.2068		983.038	3.30898		750.832	4.47738
					984.365	-0.000164379		752.19	1.12327		984.365	2.2051		984.365	3.30929		752.19	4.52686
					985.691	-0.0031		753.547	1.12545		985.691	2.20436		985.691	3.31224		753.547	4.59435
					987.018	-0.00557		754.905	1.1325		987.018	2.21302		987.018	3.32198		754.905	4.59612
					988.344	-0.00785		756.262	1.13211		988.344	2.21669		988.344	3.32482		756.262	4.58825
					989.67	-0.00456		757.619	1.13226		989.67	2.21782		989.67	3.35075		757.619	4.52916
					990.996	-0.00431		758.976	1.14576		990.996	2.21365		990.996	3.39415		758.976	4.51722
					992.321	-0.00484		760.333	1.15174		992.321	2.21557		992.321	3.43974		760.333	4.441
					993.647	0.00126		761.689	1.15407		993.647	2.21088		993.647	3.48618		761.689	4.42079
					994.972	-0.000889085		763.045	1.14791		994.972	2.21305		994.972	3.51588		763.045	4.3793
					996.298	0.00322		764.402	1.14563		996.298	2.21444		996.298	3.52358		764.402	4.37719
					997.623	0.00165		765.758	1.1403		997.623	2.2115		997.623	3.51735		765.758	4.40818
					998.947	0.00651		767.114	1.12801		998.947	2.21117		998.947	3.49231		767.114	4.45862
					1000.27	0.00786		768.469	1.11748		1000.27	2.22033		1000.27	3.46018		768.469	4.46001
					1001.6	0.01109		769.825	1.1048		1001.6	2.22062		1001.6	3.41914		769.825	4.46162
					1002.92	0.01481		771.18	1.09738		1002.92	2.21912		1002.92	3.38722		771.18	4.45523
					1004.24	0.01514		772.535	1.10254		1004.24	2.21689		1004.24	3.37222		772.535	4.46551
					1005.57	0.01574		773.89	1.10347		1005.57	2.21262		1005.57	3.35281		773.89	4.43043
					1006.89	0.01354		775.245	1.10972		1006.89	2.20882		1006.89	3.34968		775.245	4.41046
					1008.21	0.01056		776.598	1.11188		1008.21	2.2093		1008.21	3.34574		776.598	4.35671
					1009.54	0.01048		777.953	1.11871		1009.54	2.20398		1009.54	3.34911		777.953	4.34779
					1010.86	0.00397		779.307	1.11132		1010.86	2.20388		1010.86	3.35504		779.307	4.33331
					1012.18	0.00438		780.661	1.10696		1012.18	2.20719		1012.18	3.36015		780.661	4.36157
					1013.51	-0.000719893		782.014	1.10652		1013.51	2.20893		1013.51	3.39032		782.014	4.33876
					1014.83	0.00418		783.368	1.09839		1014.83	2.20484		1014.83	3.41827		783.368	4.36937
					1016.15	0.00557		784.721	1.10609		1016.15	2.19893		1016.15	3.45702		784.721	4.36864
					1017.47	0.00612		786.075	1.11023		1017.47	2.19934		1017.47	3.49416		786.075	4.3887
					1018.79	0.00593		787.427	1.12241		1018.79	2.19608		1018.79	3.51373		787.427	4.41329
					1020.12	0.00358		788.78	1.14848		1020.12	2.19775		1020.12	3.52159		788.78	4.43139
					1021.44	0.00536		790.131	1.17525		1021.44	2.19317		1021.44	3.51386		790.131	4.43395
					1022.76	0.0067		791.484	1.1971		1022.76	2.1927		1022.76	3.50376		791.484	4.47723
					1024.08	0.00313		792.836	1.20814		1024.08	2.19795		1024.08	3.47317		792.836	4.4863
					1025.4	0.00124		794.187	1.22721		1025.4	2.19938		1025.4	3.4409		794.187	4.52747
					1026.72	-0.0013		795.54	1.23151		1026.72	2.20153		1026.72	3.41487		795.54	4.55392
					1028.04	-0.000891949		796.89	1.23152		1028.04	2.19895		1028.04	3.39001		796.89	4.62974
					1029.36	-0.000995059		798.242	1.23997		1029.36	2.20283		1029.36	3.373		798.242	4.67855
					1030.68	-0.00216		799.593	1.23529		1030.68	2.20759		1030.68	3.36012		799.593	4.70181
					1032	-0.00286		800.944	1.23753		1032	2.21045		1032	3.34582		800.944	4.71275
					1033.32	-0.0026		802.294	1.2372		1033.32	2.20969		1033.32	3.33094		802.294	4.66589
					1034.64	0.00306		803.645	1.23848		1034.64	2.20675		1034.64	3.33336		803.645	4.61519
					1035.96	0.01032		804.995	1.23339		1035.96	2.20557		1035.96	3.33946		804.995	4.5779
					1037.28	0.01399		806.346	1.22573		1037.28	2.20751		1037.28	3.33877		806.346	4.51585
					1038.6	0.01609		807.695	1.21896		1038.6	2.2025		1038.6	3.34267		807.695	4.43956
					1039.92	0.01835		809.044	1.1999		1039.92	2.2042		1039.92	3.34801		809.044	4.42337
					1041.24	0.01537		810.394	1.19047		1041.24	2.20551		1041.24	3.36811		810.394	4.46308
					1042.56	0.01605		811.743	1.17634		1042.56	2.21032		1042.56	3.37944		811.743	4.49029
					1043.87	0.01342		813.092	1.16393		1043.87	2.21298		1043.87	3.39269		813.092	4.47368
					1045.19	0.01083		814.442	1.15595		1045.19	2.2203		1045.19	3.40546		814.442	4.46828
					1046.51	0.00867		815.79	1.15542		1046.51	2.22304		1046.51	3.4144		815.79	4.44773
					1047.83	0.01017		817.138	1.15355		1047.83	2.22289		1047.83	3.44273		817.138	4.46175
					1049.14	0.01103		818.486	1.15811		1049.14	2.227		1049.14	3.4711		818.486	4.44967
					1050.46	0.00988		819.835	1.16076		1050.46	2.23408		1050.46	3.50195		819.835	4.44542
					1051.78	0.01179		821.182	1.16592		1051.78	2.23053		1051.78	3.54077		821.182	4.43178
					1053.09	0.01157		822.53	1.16108		1053.09	2.23384		1053.09	3.57202		822.53	4.45055
					1054.41	0.00919		823.877	1.16004		1054.41	2.2368		1054.41	3.6088		823.877	4.4699
					1055.73	0.01317		825.224	1.15136		1055.73	2.23891		1055.73	3.63936		825.224	4.49233
					1057.04	0.01393		826.571	1.15145		1057.04	2.24737		1057.04	3.65827		826.571	4.47558
					1058.36	0.01719		827.918	1.15218		1058.36	2.25773		1058.36	3.6903		827.918	4.47304
					1059.68	0.0156		829.266	1.15053		1059.68	2.26504		1059.68	3.6996		829.266	4.45792
					1060.99	0.01637		830.612	1.14639		1060.99	2.26999		1060.99	3.72622		830.612	4.47468
					1062.31	0.01505		831.958	1.15167		1062.31	2.27473		1062.31	3.73961		831.958	4.45075
					1063.62	0.01451		833.304	1.15648		1063.62	2.28099		1063.62	3.74913		833.304	4.45651
					1064.94	0.01849		834.65	1.15342		1064.94	2.28694		1064.94	3.75197		834.65	4.45413
					1066.25	0.01911		835.996	1.14458		1066.25	2.29471		1066.25	3.74316		835.996	4.43158
					1067.57	0.02338		837.341	1.14423		1067.57	2.30471		1067.57	3.72286		837.341	4.41741
					1068.88	0.03152		838.686	1.13216		1068.88	2.31106		1068.88	3.70239		838.686	4.3732
					1070.2	0.03924		840.031	1.12631		1070.2	2.32518		1070.2	3.67787		840.031	4.34113
					1071.51	0.04397		841.376	1.1263		1071.51	2.33171		1071.51	3.66542		841.376	4.34888
					1072.82	0.04429		842.72	1.11122		1072.82	2.32953		1072.82	3.63515		842.72	4.32479
					1074.14	0.04289		844.065	1.10157		1074.14	2.32715		1074.14	3.60713		844.065	4.37548
					1075.45	0.03779		845.409	1.10676		1075.45	2.3222		1075.45	3.56218		845.409	4.38281
					1076.77	0.03141		846.753	1.11263		1076.77	2.31768		1076.77	3.53409		846.753	4.39805
					1078.08	0.02765		848.097	1.11507		1078.08	2.31418		1078.08	3.50427		848.097	4.40042
					1079.39	0.02034		849.441	1.11291		1079.39	2.30479		1079.39	3.47567		849.441	4.36719
					1080.7	0.02193		850.784	1.1223		1080.7	2.3018		1080.7	3.45127		850.784	4.33682
					1082.02	0.0204		852.127	1.12387		1082.02	2.29503		1082.02	3.43682		852.127	4.30298
					1083.33	0.01726		853.471	1.13122		1083.33	2.29423		1083.33	3.42696		853.471	4.31498
					1084.64	0.0149		854.814	1.13708		1084.64	2.2859		1084.64	3.42816		854.814	4.32933
					1085.95	0.01502		856.156	1.12072		1085.95	2.2777		1085.95	3.42042		856.156	4.32641
					1087.27	0.01116		857.499	1.10843		1087.27	2.27724		1087.27	3.41068		857.499	4.41117
					1088.58	0.01032		858.841	1.10818		1088.58	2.27329		1088.58	3.40499		858.841	4.46655
					1089.89	0.00576		860.184	1.10702		1089.89	2.27187		1089.89	3.41341		860.184	4.50654
					1091.2	0.00696		861.525	1.11033		1091.2	2.26644		1091.2	3.41201		861.525	4.53554
					1092.51	0.00559		862.867	1.09805		1092.51	2.25943		1092.51	3.41626		862.867	4.4962
					1093.82	0.00855		864.208	1.097		1093.82	2.25687		1093.82	3.4182		864.208	4.46826
					1095.13	0.00808		865.55	1.10728		1095.13	2.25824		1095.13	3.4115		865.55	4.46677
					1096.44	0.00442		866.892	1.11393		1096.44	2.25788		1096.44	3.40464		866.892	4.43396
					1097.75	0.00283		868.232	1.10816		1097.75	2.26003		1097.75	3.40297		868.232	4.45134
					1099.06	0.00148		869.573	1.10395		1099.06	2.26842		1099.06	3.38898		869.573	4.43826
					1100.37	0.00251		870.913	1.10393		1100.37	2.27391		1100.37	3.38256		870.913	4.46029
					1101.68	4.49664e-05		872.254	1.10426		1101.68	2.28466		1101.68	3.37379		872.254	4.49768
					1102.99	-0.00399		873.594	1.10815		1102.99	2.30176		1102.99	3.36472		873.594	4.51393
					1104.3	0.00040765		874.934	1.10776		1104.3	2.30639		1104.3	3.36124		874.934	4.52865
					1105.61	0.00544		876.273	1.09914		1105.61	2.31892		1105.61	3.35593		876.273	4.48876
					1106.92	0.00861		877.612	1.10597		1106.92	2.32388		1106.92	3.34168		877.612	4.48411
					1108.23	0.01246		878.953	1.11206		1108.23	2.32919		1108.23	3.33814		878.953	4.49806
					1109.54	0.01231		880.291	1.1175		1109.54	2.32407		1109.54	3.33329		880.291	4.47327
					1110.85	0.0108		881.631	1.11686		1110.85	2.31426		1110.85	3.33664		881.631	4.44844
					1112.16	0.00928		882.969	1.11982		1112.16	2.30459		1112.16	3.33924		882.969	4.43509
					1113.46	0.00881		884.307	1.11309		1113.46	2.29341		1113.46	3.33704		884.307	4.39737
					1114.77	0.00295		885.647	1.10761		1114.77	2.28781		1114.77	3.32545		885.647	4.38972
					1116.08	-0.00285		886.985	1.10583		1116.08	2.27556		1116.08	3.31787		886.985	4.37666
					1117.39	-0.00327		888.322	1.10144		1117.39	2.26357		1117.39	3.31474		888.322	4.36434
					1118.69	-0.00467		889.66	1.0984		1118.69	2.25658		1118.69	3.30118		889.66	4.36287
					1120	-0.00706		890.998	1.09814		1120	2.24727		1120	3.29688		890.998	4.39037
					1121.31	-0.00246		892.335	1.09174		1121.31	2.24431		1121.31	3.30293		892.335	4.40813
					1122.62	0.00156		893.672	1.09557		1122.62	2.23891		1122.62	3.30661		893.672	4.40929
					1123.92	0.00386		895.009	1.0994		1123.92	2.23116		1123.92	3.30827		895.009	4.39947
					1125.23	0.00704		896.346	1.11404		1125.23	2.23251		1125.23	3.31281		896.346	4.42879
					1126.53	0.01647		897.683	1.13023		1126.53	2.23354		1126.53	3.31158		897.683	4.42098
					1127.84	0.02118		899.02	1.14551		1127.84	2.23078		1127.84	3.31127		899.02	4.45089
					1129.15	0.02081		900.356	1.16234		1129.15	2.22661		1129.15	3.31031		900.356	4.44828
					1130.45	0.01617		901.692	1.17913		1130.45	2.22712		1130.45	3.31039		901.692	4.44278
					1131.76	0.01103		903.027	1.18908		1131.76	2.22588		1131.76	3.3046		903.027	4.44717
					1133.06	0.00776		904.363	1.19401		1133.06	2.2243		1133.06	3.31194		904.363	4.46202
					1134.37	0.00468		905.698	1.20146		1134.37	2.22265		1134.37	3.31301		905.698	4.46331
					1135.67	0.00326		907.034	1.20879		1135.67	2.2224		1135.67	3.31306		907.034	4.46678
					1136.98	0.00382		908.369	1.2209		1136.98	2.22082		1136.98	3.30623		908.369	4.46039
					1138.28	0.0052		909.704	1.23615		1138.28	2.2176		1138.28	3.30728		909.704	4.45203
					1139.59	0.01079		911.038	1.24594		1139.59	2.2099		1139.59	3.30264		911.038	4.47207
					1140.89	0.01117		912.373	1.24766		1140.89	2.20718		1140.89	3.29079		912.373	4.49933
					1142.19	0.00987		913.707	1.24476		1142.19	2.20795		1142.19	3.28347		913.707	4.50703
					1143.5	0.00613		915.042	1.2295		1143.5	2.20579		1143.5	3.28277		915.042	4.55892
					1144.8	0.00335		916.376	1.20474		1144.8	2.20241		1144.8	3.28601		916.376	4.57111
					1146.1	0.000504288		917.708	1.17338		1146.1	2.20218		1146.1	3.29491		917.708	4.59085
					1147.41	-0.000416201		919.042	1.14421		1147.41	2.20496		1147.41	3.29693		919.042	4.56693
					1148.71	0.00144		920.375	1.12857		1148.71	2.2062		1148.71	3.30755		920.375	4.59874
					1150.01	0.00576		921.709	1.11684		1150.01	2.20874		1150.01	3.31769		921.709	4.64452
					1151.32	0.00922		923.042	1.10672		1151.32	2.20929		1151.32	3.32918		923.042	4.66296
					1152.62	0.01239		924.374	1.10592		1152.62	2.21624		1152.62	3.34125		924.374	4.66572
					1153.92	0.01386		925.706	1.11413		1153.92	2.22844		1153.92	3.33803		925.706	4.68535
					1155.22	0.01318		927.039	1.11974		1155.22	2.23446		1155.22	3.34074		927.039	4.69365
					1156.52	0.01531		928.372	1.1262		1156.52	2.23844		1156.52	3.34977		928.372	4.71293
					1157.83	0.01002		929.703	1.12565		1157.83	2.24756		1157.83	3.34865		929.703	4.66299
					1159.13	0.0098		931.035	1.12277		1159.13	2.25951		1159.13	3.35213		931.035	4.63667
					1160.43	0.00905		932.367	1.11617		1160.43	2.26177		1160.43	3.34876		932.367	4.59706
					1161.73	0.00581		933.697	1.12334		1161.73	2.25246		1161.73	3.33691		933.697	4.6306
					1163.03	0.00783		935.029	1.12861		1163.03	2.25348		1163.03	3.32397		935.029	4.60767
					1164.33	0.01057		936.359	1.13273		1164.33	2.2532		1164.33	3.32415		936.359	4.5894
					1165.63	0.01343		937.69	1.13673		1165.63	2.25617		1165.63	3.33		937.69	4.54664
					1166.93	0.02008		939.022	1.14079		1166.93	2.25513		1166.93	3.33311		939.022	4.5367
					1168.23	0.02401		940.351	1.14304		1168.23	2.25129		1168.23	3.33746		940.351	4.50959
					1169.53	0.03083		941.682	1.14793		1169.53	2.25371		1169.53	3.36053		941.682	4.49076
					1170.83	0.03468		943.011	1.13461		1170.83	2.26166		1170.83	3.3644		943.011	4.42796
					1172.13	0.04744		944.342	1.12129		1172.13	2.26697		1172.13	3.38232		944.342	4.43611
					1173.43	0.05654		945.671	1.10562		1173.43	2.27		1173.43	3.39076		945.671	4.46077
					1174.73	0.07094		947	1.09965		1174.73	2.26779		1174.73	3.38887		947	4.48859
					1176.03	0.0879		948.33	1.09767		1176.03	2.27447		1176.03	3.39405		948.33	4.47504
					1177.33	0.10281		949.658	1.10408		1177.33	2.27713		1177.33	3.40953		949.658	4.4921
					1178.63	0.11615		950.988	1.1107		1178.63	2.27945		1178.63	3.41609		950.988	4.47608
					1179.93	0.1233		952.316	1.11237		1179.93	2.271		1179.93	3.4162		952.316	4.50621
					1181.23	0.12813		953.644	1.11806		1181.23	2.26481		1181.23	3.41098		953.644	4.51628
					1182.52	0.12831		954.973	1.12712		1182.52	2.26011		1182.52	3.40466		954.973	4.49183
					1183.82	0.12706		956.301	1.12224		1183.82	2.25701		1183.82	3.38243		956.301	4.43074
					1185.12	0.12551		957.628	1.11823		1185.12	2.25076		1185.12	3.36381		957.628	4.43743
					1186.42	0.12281		958.957	1.11515		1186.42	2.2435		1186.42	3.34776		958.957	4.41123
					1187.71	0.12789		960.284	1.11527		1187.71	2.23315		1187.71	3.3311		960.284	4.39202
					1189.01	0.13397		961.611	1.10703		1189.01	2.2231		1189.01	3.32275		961.611	4.3936
					1190.31	0.1413		962.938	1.10539		1190.31	2.21727		1190.31	3.32096		962.938	4.37744
					1191.6	0.1444		964.264	1.10177		1191.6	2.21534		1191.6	3.3226		964.264	4.37657
					1192.9	0.14656		965.592	1.10546		1192.9	2.21012		1192.9	3.32153		965.592	4.42917
					1194.2	0.15778		966.918	1.10751		1194.2	2.20945		1194.2	3.33023		966.918	4.43477
					1195.49	0.16052		968.244	1.11636		1195.49	2.21506		1195.49	3.33107		968.244	4.415
					1196.79	0.16427		969.57	1.12048		1196.79	2.21739		1196.79	3.33114		969.57	4.38331
					1198.09	0.16519		970.896	1.12474		1198.09	2.21773		1198.09	3.32748		970.896	4.36575
					1199.38	0.16341		972.222	1.12282		1199.38	2.21664		1199.38	3.32889		972.222	4.32314
					1200.68	0.15895		973.547	1.12795		1200.68	2.21226		1200.68	3.32016		973.547	4.32456
					1201.97	0.15163		974.872	1.12418		1201.97	2.21191		1201.97	3.31725		974.872	4.32468
					1203.27	0.14327		976.197	1.12262		1203.27	2.21057		1203.27	3.31499		976.197	4.31705
					1204.56	0.12408		977.522	1.11896		1204.56	2.21018		1204.56	3.31461		977.522	4.33894
					1205.86	0.10989		978.847	1.12883		1205.86	2.2076		1205.86	3.3079		978.847	4.37178
					1207.15	0.09947		980.172	1.12444		1207.15	2.2059		1207.15	3.31729		980.172	4.37154
					1208.45	0.08189		981.496	1.1184		1208.45	2.20852		1208.45	3.31612		981.496	4.38808
					1209.74	0.06741		982.82	1.12077		1209.74	2.20228		1209.74	3.30695		982.82	4.39873
					1211.03	0.05331		984.145	1.11782		1211.03	2.20516		1211.03	3.31072		984.145	4.44337
					1212.33	0.04051		985.468	1.11139		1212.33	2.20612		1212.33	3.31389		985.468	4.41687
					1213.62	0.02854		986.792	1.11245		1213.62	2.21357		1213.62	3.30025		986.792	4.40493
					1214.91	0.02229		988.116	1.12355		1214.91	2.21934		1214.91	3.29964		988.116	4.39081
					1216.21	0.01401		989.439	1.12389		1216.21	2.2189		1216.21	3.29393		989.439	4.41611
					1217.5	0.00663		990.761	1.1205		1217.5	2.22136		1217.5	3.28903		990.761	4.4332
					1218.79	0.00595		992.084	1.12105		1218.79	2.22204		1218.79	3.29495		992.084	4.43547
					1220.09	0.00969		993.407	1.10573		1220.09	2.22377		1220.09	3.31339		993.407	4.45594
					1221.38	0.00911		994.73	1.09513		1221.38	2.21626		1221.38	3.30958		994.73	4.46709
					1222.67	0.00716		996.051	1.09457		1222.67	2.21219		1222.67	3.30084		996.051	4.50337
					1223.96	0.00723		997.374	1.09052		1223.96	2.21429		1223.96	3.30855		997.374	4.55389
					1225.25	0.00917		998.696	1.09301		1225.25	2.21411		1225.25	3.30474		998.696	4.51222
					1226.55	0.01092		1000.02	1.08953		1226.55	2.21357		1226.55	3.30323		1000.02	4.48882
					1227.84	0.00966		1001.34	1.09564		1227.84	2.21112		1227.84	3.3027		1001.34	4.4776
					1229.13	0.00618		1002.66	1.10276		1229.13	2.21294		1229.13	3.30031		1002.66	4.47881
					1230.42	0.01018		1003.98	1.11125		1230.42	2.21506		1230.42	3.30769		1003.98	4.44934
					1231.71	0.01332		1005.3	1.10266		1231.71	2.22181		1231.71	3.31676		1005.3	4.43068
					1233	0.01364		1006.62	1.0947		1233	2.22523		1233	3.32706		1006.62	4.43165
					1234.29	0.01311		1007.94	1.09764		1234.29	2.21596		1234.29	3.31761		1007.94	4.39844
					1235.58	0.01275		1009.26	1.09507		1235.58	2.21878		1235.58	3.31028		1009.26	4.4485
					1236.87	0.01648		1010.58	1.10092		1236.87	2.21762		1236.87	3.31069		1010.58	4.48516
					1238.16	0.02059		1011.9	1.10623		1238.16	2.212		1238.16	3.31756		1011.9	4.50466
					1239.45	0.01899		1013.22	1.10417		1239.45	2.20581		1239.45	3.33249		1013.22	4.52003
					1240.74	0.01567		1014.54	1.10582		1240.74	2.20198		1240.74	3.32678		1014.54	4.54505
					1242.03	0.01385		1015.86	1.11706		1242.03	2.19907		1242.03	3.32866		1015.86	4.56774
					1243.32	0.01528		1017.18	1.12019		1243.32	2.19241		1243.32	3.33228		1017.18	4.54939
					1244.61	0.01495		1018.5	1.1124		1244.61	2.19763		1244.61	3.33195		1018.5	4.51597
					1245.9	0.0114		1019.82	1.11134		1245.9	2.19366		1245.9	3.34163		1019.82	4.49957
					1247.19	0.0131		1021.14	1.11149		1247.19	2.19046		1247.19	3.33684		1021.14	4.47302
					1248.48	0.0149		1022.46	1.09556		1248.48	2.19541		1248.48	3.33443		1022.46	4.53458
					1249.77	0.01481		1023.77	1.08519		1249.77	2.20136		1249.77	3.33245		1023.77	4.48707
					1251.05	0.01435		1025.09	1.08802		1251.05	2.20461		1251.05	3.33683		1025.09	4.49174
					1252.34	0.0068		1026.41	1.09224		1252.34	2.21106		1252.34	3.33054		1026.41	4.4641
					1253.63	0.00693		1027.73	1.09251		1253.63	2.21178		1253.63	3.31889		1027.73	4.41957
					1254.92	0.0058		1029.05	1.10256		1254.92	2.21724		1254.92	3.32204		1029.05	4.40354
					1256.21	0.00603		1030.36	1.11237		1256.21	2.22106		1256.21	3.32552		1030.36	4.32485
					1257.49	0.00887		1031.68	1.12241		1257.49	2.21653		1257.49	3.3335		1031.68	4.29458
					1258.78	0.01483		1033	1.12781		1258.78	2.21083		1258.78	3.35045		1033	4.3209
					1260.07	0.0151		1034.31	1.12851		1260.07	2.21742		1260.07	3.34495		1034.31	4.36135
					1261.35	0.01673		1035.63	1.12297		1261.35	2.22489		1261.35	3.34114		1035.63	4.4308
					1262.64	0.0156		1036.95	1.11853		1262.64	2.23171		1262.64	3.33702		1036.95	4.40619
					1263.93	0.01241		1038.26	1.12441		1263.93	2.23254		1263.93	3.33017		1038.26	4.45403
					1265.21	0.01822		1039.58	1.12179		1265.21	2.23536		1265.21	3.32355		1039.58	4.43836
					1266.5	0.03039		1040.89	1.1204		1266.5	2.23479		1266.5	3.31746		1040.89	4.42763
					1267.78	0.03919		1042.21	1.1266		1267.78	2.2446		1267.78	3.32593		1042.21	4.42518
					1269.07	0.04776		1043.52	1.11922		1269.07	2.24661		1269.07	3.3308		1043.52	4.41607
					1270.36	0.06003		1044.84	1.11457		1270.36	2.23585		1270.36	3.34026		1044.84	4.42088
					1271.64	0.07137		1046.15	1.1084		1271.64	2.23585		1271.64	3.34103		1046.15	4.43891
					1272.93	0.0801		1047.47	1.10703		1272.93	2.24173		1272.93	3.33867		1047.47	4.44373
					1274.21	0.0871		1048.78	1.10907		1274.21	2.24284		1274.21	3.34214		1048.78	4.43005
					1275.5	0.09121		1050.1	1.10134		1275.5	2.24458		1275.5	3.34906		1050.1	4.41798
					1276.78	0.08898		1051.41	1.10154		1276.78	2.24456		1276.78	3.34284		1051.41	4.44523
					1278.06	0.0917		1052.73	1.10404		1278.06	2.24481		1278.06	3.33788		1052.73	4.42702
					1279.35	0.09031		1054.04	1.10714		1279.35	2.24829		1279.35	3.32903		1054.04	4.45518
					1280.63	0.08648		1055.35	1.11618		1280.63	2.25558		1280.63	3.33937		1055.35	4.4524
					1281.92	0.08388		1056.67	1.11534		1281.92	2.25951		1281.92	3.34127		1056.67	4.49008
					1283.2	0.07973		1057.98	1.12118		1283.2	2.26118		1283.2	3.34325		1057.98	4.47909
					1284.48	0.07423		1059.29	1.12767		1284.48	2.2617		1284.48	3.33954		1059.29	4.48209
					1285.77	0.06992		1060.6	1.13497		1285.77	2.26331		1285.77	3.34445		1060.6	4.43867
					1287.05	0.06545		1061.92	1.13329		1287.05	2.26314		1287.05	3.35323		1061.92	4.35693
					1288.33	0.0591		1063.23	1.12608		1288.33	2.26678		1288.33	3.3521		1063.23	4.35806
					1289.61	0.04759		1064.54	1.12056		1289.61	2.266		1289.61	3.34635		1064.54	4.36361
					1290.9	0.03539		1065.85	1.11435		1290.9	2.27544		1290.9	3.33761		1065.85	4.35012
					1292.18	0.03112		1067.17	1.1137		1292.18	2.28602		1292.18	3.33452		1067.17	4.37982
					1293.46	0.0283		1068.48	1.124		1293.46	2.29344		1293.46	3.3324		1068.48	4.35605
					1294.74	0.02622		1069.79	1.13228		1294.74	2.31286		1294.74	3.32911		1069.79	4.38667
					1296.02	0.02267		1071.1	1.13454		1296.02	2.32682		1296.02	3.31665		1071.1	4.38745
					1297.31	0.01917		1072.41	1.13754		1297.31	2.34994		1297.31	3.3105		1072.41	4.38681
					1298.59	0.01909		1073.72	1.13096		1298.59	2.37342		1298.59	3.31159		1073.72	4.35788
					1299.87	0.0189		1075.03	1.12549		1299.87	2.40157		1299.87	3.3176		1075.03	4.3375
					1301.15	0.01702		1076.34	1.11241		1301.15	2.43098		1301.15	3.31397		1076.34	4.39696
					1302.43	0.01446		1077.65	1.10372		1302.43	2.46352		1302.43	3.32509		1077.65	4.457
					1303.71	0.00907		1078.96	1.10189		1303.71	2.50126		1303.71	3.3207		1078.96	4.52811
					1304.99	0.01209		1080.27	1.10236		1304.99	2.54291		1304.99	3.33031		1080.27	4.5545
					1306.27	0.01142		1081.58	1.10895		1306.27	2.57756		1306.27	3.3352		1081.58	4.53181
					1307.55	0.0094		1082.89	1.10622		1307.55	2.61161		1307.55	3.33571		1082.89	4.5422
					1308.83	0.00627		1084.2	1.10155		1308.83	2.64788		1308.83	3.33263		1084.2	4.5315
					1310.11	0.00543		1085.51	1.10598		1310.11	2.69952		1310.11	3.3316		1085.51	4.50597
					1311.39	0.00636		1086.82	1.10146		1311.39	2.75032		1311.39	3.32371		1086.82	4.47856
					1312.67	0.00397		1088.13	1.11463		1312.67	2.80544		1312.67	3.31607		1088.13	4.45932
					1313.95	0.00504		1089.44	1.11564		1313.95	2.86839		1313.95	3.29864		1089.44	4.45082
					1315.23	0.0082		1090.75	1.12865		1315.23	2.92916		1315.23	3.28958		1090.75	4.4835
					1316.51	0.0064		1092.05	1.13353		1316.51	2.99008		1316.51	3.27912		1092.05	4.5283
					1317.79	0.00988		1093.36	1.1339		1317.79	3.05081		1317.79	3.29762		1093.36	4.57504
					1319.06	0.01073		1094.67	1.13916		1319.06	3.0977		1319.06	3.3031		1094.67	4.57716
					1320.34	0.01294		1095.98	1.13489		1320.34	3.13925		1320.34	3.31765		1095.98	4.58706
					1321.62	0.01417		1097.29	1.13853		1321.62	3.17152		1321.62	3.33148		1097.29	4.60395
					1322.9	0.01934		1098.59	1.14952		1322.9	3.19414		1322.9	3.33692		1098.59	4.6114
					1324.18	0.02251		1099.9	1.15032		1324.18	3.2		1324.18	3.33104		1099.9	4.61942
					1325.45	0.03114		1101.21	1.16706		1325.45	3.19068		1325.45	3.32335		1101.21	4.60322
					1326.73	0.03795		1102.51	1.16911		1326.73	3.1795		1326.73	3.30853		1102.51	4.60232
					1328.01	0.0469		1103.82	1.17334		1328.01	3.14547		1328.01	3.29726		1103.82	4.61784
					1329.28	0.05371		1105.13	1.17606		1329.28	3.11121		1329.28	3.29666		1105.13	4.62904
					1330.56	0.0623		1106.43	1.18708		1330.56	3.06193		1330.56	3.30379		1106.43	4.6761
					1331.84	0.07754		1107.74	1.191		1331.84	3.02476		1331.84	3.30828		1107.74	4.65013
					1333.11	0.08736		1109.04	1.19243		1333.11	2.98079		1333.11	3.32145		1109.04	4.63419
					1334.39	0.09469		1110.35	1.19702		1334.39	2.93174		1334.39	3.32641		1110.35	4.67859
					1335.67	0.10271		1111.66	1.20449		1335.67	2.87398		1335.67	3.33073		1111.66	4.76022
					1336.94	0.10665		1112.96	1.2004		1336.94	2.81176		1336.94	3.32473		1112.96	4.82042
					1338.22	0.11406		1114.27	1.20079		1338.22	2.74415		1338.22	3.31253		1114.27	4.86843
					1339.49	0.11949		1115.57	1.19102		1339.49	2.6813		1339.49	3.31469		1115.57	4.93394
					1340.77	0.12144		1116.88	1.18958		1340.77	2.60159		1340.77	3.30522		1116.88	4.97334
					1342.04	0.12917		1118.18	1.19518		1342.04	2.53605		1342.04	3.29997		1118.18	4.98814
					1343.32	0.13389		1119.48	1.19271		1343.32	2.46585		1343.32	3.30085		1119.48	5.02573
					1344.59	0.14824		1120.79	1.1904		1344.59	2.41093		1344.59	3.30422		1120.79	5.00368
					1345.87	0.15734		1122.09	1.19134		1345.87	2.36526		1345.87	3.30191		1122.09	4.99659
					1347.14	0.16828		1123.39	1.18984		1347.14	2.33835		1347.14	3.30377		1123.39	4.97577
					1348.42	0.18371		1124.7	1.18949		1348.42	2.30398		1348.42	3.30337		1124.7	4.96368
					1349.69	0.19541		1126	1.18513		1349.69	2.28238		1349.69	3.2942		1126	4.89643
					1350.96	0.21432		1127.31	1.17819		1350.96	2.26963		1350.96	3.28909		1127.31	4.82794
					1352.24	0.23152		1128.61	1.17852		1352.24	2.26726		1352.24	3.29863		1128.61	4.77725
					1353.51	0.24644		1129.91	1.1914		1353.51	2.25643		1353.51	3.29801		1129.91	4.68189
					1354.78	0.25359		1131.21	1.19599		1354.78	2.25162		1354.78	3.29196		1131.21	4.59636
					1356.06	0.25092		1132.52	1.18214		1356.06	2.23409		1356.06	3.29667		1132.52	4.56831
					1357.33	0.24813		1133.82	1.18531		1357.33	2.22272		1357.33	3.29651		1133.82	4.54001
					1358.6	0.23018		1135.12	1.18621		1358.6	2.21799		1358.6	3.30397		1135.12	4.5159
					1359.87	0.21183		1136.42	1.17471		1359.87	2.21273		1359.87	3.31229		1136.42	4.48312
					1361.15	0.19273		1137.72	1.18043		1361.15	2.19795		1361.15	3.31843		1137.72	4.48872
					1362.42	0.16492		1139.02	1.18626		1362.42	2.19826		1362.42	3.31737		1139.02	4.51814
					1363.69	0.14057		1140.33	1.18231		1363.69	2.20259		1363.69	3.32465		1140.33	4.53052
					1364.96	0.1182		1141.63	1.1925		1364.96	2.20906		1364.96	3.32781		1141.63	4.54322
					1366.23	0.1032		1142.93	1.20802		1366.23	2.20976		1366.23	3.32353		1142.93	4.50056
					1367.51	0.08277		1144.23	1.2157		1367.51	2.21166		1367.51	3.31321		1144.23	4.4711
					1368.78	0.07382		1145.53	1.21446		1368.78	2.21603		1368.78	3.30117		1145.53	4.48844
					1370.05	0.06555		1146.83	1.21936		1370.05	2.22749		1370.05	3.28944		1146.83	4.4934
					1371.32	0.05619		1148.13	1.22644		1371.32	2.23089		1371.32	3.29592		1148.13	4.43466
					1372.59	0.05091		1149.43	1.21775		1372.59	2.23352		1372.59	3.29425		1149.43	4.45501
					1373.86	0.04945		1150.73	1.22239		1373.86	2.2324		1373.86	3.29772		1150.73	4.44364
					1375.13	0.0407		1152.03	1.22154		1375.13	2.23394		1375.13	3.30621		1152.03	4.45226
					1376.4	0.03423		1153.33	1.21874		1376.4	2.22965		1376.4	3.31773		1153.33	4.40461
					1377.67	0.02812		1154.63	1.22149		1377.67	2.21791		1377.67	3.307		1154.63	4.36816
					1378.94	0.02646		1155.92	1.23392		1378.94	2.21262		1378.94	3.31203		1155.92	4.32432
					1380.21	0.02578		1157.22	1.25672		1380.21	2.2091		1380.21	3.30784		1157.22	4.29535
					1381.48	0.02845		1158.52	1.27349		1381.48	2.20842		1381.48	3.30059		1158.52	4.33986
					1382.75	0.03106		1159.82	1.29927		1382.75	2.2107		1382.75	3.2915		1159.82	4.32538
					1384.02	0.03449		1161.12	1.32474		1384.02	2.20519		1384.02	3.29725		1161.12	4.33826
					1385.29	0.03589		1162.42	1.36964		1385.29	2.21086		1385.29	3.29792		1162.42	4.40118
					1386.56	0.04602		1163.71	1.41671		1386.56	2.21623		1386.56	3.30994		1163.71	4.4174
					1387.82	0.0452		1165.01	1.46117		1387.82	2.20891		1387.82	3.31681		1165.01	4.4499
					1389.09	0.0436		1166.31	1.5165		1389.09	2.21057		1389.09	3.31748		1166.31	4.46425
					1390.36	0.03708		1167.61	1.5493		1390.36	2.20746		1390.36	3.30754		1167.61	4.45202
					1391.63	0.03134		1168.9	1.57237		1391.63	2.21118		1391.63	3.31132		1168.9	4.45802
					1392.9	0.02365		1170.2	1.61047		1392.9	2.20822		1392.9	3.30962		1170.2	4.48695
					1394.16	0.01746		1171.5	1.62703		1394.16	2.20856		1394.16	3.30528		1171.5	4.54899
					1395.43	0.01648		1172.79	1.63784		1395.43	2.20923		1395.43	3.29558		1172.79	4.49186
					1396.7	0.01144		1174.09	1.65102		1396.7	2.20319		1396.7	3.2944		1174.09	4.53023
					1397.97	0.00975		1175.39	1.67748		1397.97	2.2073		1397.97	3.29025		1175.39	4.50905
					1399.23	0.01391		1176.68	1.68051		1399.23	2.21267		1399.23	3.29354		1176.68	4.49565
					1400.5	0.01459		1177.98	1.67531		1400.5	2.20238		1400.5	3.28935		1177.98	4.50044
					1401.77	0.01784		1179.27	1.68059		1401.77	2.20324		1401.77	3.28373		1179.27	4.51022
					1403.03	0.02203		1180.57	1.64477		1403.03	2.2012		1403.03	3.28308		1180.57	4.48205
					1404.3	0.01706		1181.86	1.61312		1404.3	2.19803		1404.3	3.28505		1181.86	4.48405
					1405.56	0.01598		1183.16	1.59985		1405.56	2.1965		1405.56	3.28787		1183.16	4.51471
					1406.83	0.01787		1184.45	1.56141		1406.83	2.19202		1406.83	3.28594		1184.45	4.51746
					1408.1	0.01798		1185.75	1.52863		1408.1	2.19327		1408.1	3.29214		1185.75	4.48197
					1409.36	0.00966		1187.04	1.50399		1409.36	2.19202		1409.36	3.29542		1187.04	4.50397
					1410.63	0.00489		1188.34	1.47359		1410.63	2.19582		1410.63	3.29204		1188.34	4.48851
					1411.89	0.00089789		1189.63	1.43616		1411.89	2.20483		1411.89	3.28941		1189.63	4.51466
					1413.16	0.00208		1190.92	1.40512		1413.16	2.20488		1413.16	3.28954		1190.92	4.54622
					1414.42	0.00113		1192.22	1.38256		1414.42	2.21259		1414.42	3.28055		1192.22	4.53745
					1415.69	0.00523		1193.51	1.3334		1415.69	2.21474		1415.69	3.2891		1193.51	4.50832
					1416.95	-0.000271116		1194.8	1.29948		1416.95	2.21887		1416.95	3.29518		1194.8	4.53665
					1418.21	0.00184		1196.1	1.26537		1418.21	2.22624		1418.21	3.28929		1196.1	4.52709
					1419.48	0.00398		1197.39	1.23315		1419.48	2.22396		1419.48	3.28763		1197.39	4.48125
					1420.74	0.00907		1198.68	1.22335		1420.74	2.23176		1420.74	3.2974		1198.68	4.43807
					1422	0.01309		1199.98	1.21463		1422	2.2365		1422	3.30007		1199.98	4.40911
					1423.27	0.02333		1201.27	1.21614		1423.27	2.23744		1423.27	3.29978		1201.27	4.40116
					1424.53	0.03356		1202.56	1.21162		1424.53	2.24469		1424.53	3.30198		1202.56	4.35009
					1425.79	0.04311		1203.85	1.21049		1425.79	2.23904		1425.79	3.29904		1203.85	4.33902
					1427.06	0.04992		1205.14	1.20216		1427.06	2.23936		1427.06	3.29504		1205.14	4.34011
					1428.32	0.05691		1206.44	1.19617		1428.32	2.22362		1428.32	3.31005		1206.44	4.35048
					1429.58	0.05316		1207.73	1.18278		1429.58	2.22257		1429.58	3.31191		1207.73	4.39771
					1430.84	0.05194		1209.02	1.17181		1430.84	2.21893		1430.84	3.30576		1209.02	4.40983
					1432.11	0.04821		1210.31	1.17459		1432.11	2.21796		1432.11	3.30099		1210.31	4.48029
					1433.37	0.04331		1211.6	1.18398		1433.37	2.2265		1433.37	3.29974		1211.6	4.5373
					1434.63	0.0323		1212.89	1.19965		1434.63	2.2314		1434.63	3.29439		1212.89	4.61763
					1435.89	0.02829		1214.18	1.20986		1435.89	2.23506		1435.89	3.29989		1214.18	4.60756
					1437.15	0.02237		1215.47	1.21738		1437.15	2.24704		1437.15	3.29971		1215.47	4.59746
					1438.41	0.01235		1216.76	1.21018		1438.41	2.24721		1438.41	3.29814		1216.76	4.64297
					1439.68	0.01075		1218.05	1.20434		1439.68	2.24642		1439.68	3.30826		1218.05	4.64025
					1440.94	0.01137		1219.34	1.19832		1440.94	2.24021		1440.94	3.32199		1219.34	4.62252
					1442.2	0.0104		1220.63	1.17959		1442.2	2.23929		1442.2	3.32525		1220.63	4.5672
					1443.46	0.01267		1221.92	1.17199		1443.46	2.24468		1443.46	3.33017		1221.92	4.54144
					1444.72	0.01584		1223.21	1.16387		1444.72	2.24855		1444.72	3.32648		1223.21	4.52414
					1445.98	0.01316		1224.5	1.1571		1445.98	2.24498		1445.98	3.31996		1224.5	4.54788
					1447.24	0.00867		1225.79	1.14583		1447.24	2.24429		1447.24	3.31803		1225.79	4.5902
					1448.5	0.00991		1227.08	1.13848		1448.5	2.2436		1448.5	3.32093		1227.08	4.59829
					1449.76	0.0067		1228.36	1.13047		1449.76	2.2403		1449.76	3.30867		1228.36	4.64762
					1451.02	0.0029		1229.65	1.12188		1451.02	2.2336		1451.02	3.30959		1229.65	4.68899
					1452.28	0.00601		1230.94	1.11938		1452.28	2.22943		1452.28	3.30756		1230.94	4.70728
					1453.53	0.00637		1232.23	1.12025		1453.53	2.22718		1453.53	3.31637		1232.23	4.70285
					1454.79	0.0054		1233.52	1.1159		1454.79	2.21944		1454.79	3.3106		1233.52	4.60907
					1456.05	0.00248		1234.8	1.11522		1456.05	2.22215		1456.05	3.31331		1234.8	4.5843
					1457.31	0.00481		1236.09	1.10867		1457.31	2.21879		1457.31	3.31164		1236.09	4.597
					1458.57	0.00408		1237.38	1.11282		1458.57	2.21812		1458.57	3.31419		1237.38	4.64088
					1459.83	0.01058		1238.66	1.10959		1459.83	2.22821		1459.83	3.32025		1238.66	4.6809
					1461.09	0.00935		1239.95	1.11973		1461.09	2.22298		1461.09	3.32134		1239.95	4.67225
					1462.34	0.01493		1241.24	1.11102		1462.34	2.22068		1462.34	3.31474		1241.24	4.67694
					1463.6	0.0165		1242.52	1.114		1463.6	2.22185		1463.6	3.32014		1242.52	4.7112
					1464.86	0.01041		1243.81	1.12284		1464.86	2.22452		1464.86	3.32509		1243.81	4.69444
					1466.12	0.00836		1245.1	1.12919		1466.12	2.22598		1466.12	3.33431		1245.1	4.57795
					1467.37	0.00459		1246.38	1.12948		1467.37	2.2309		1467.37	3.3304		1246.38	4.43291
					1468.63	0.00356		1247.67	1.12592		1468.63	2.23277		1468.63	3.34005		1247.67	4.3678
					1469.89	0.00252		1248.95	1.12451		1469.89	2.23527		1469.89	3.35257		1248.95	4.30505
					1471.14	0.00389		1250.24	1.13286		1471.14	2.23157		1471.14	3.37057		1250.24	4.29996
					1472.4	0.00731		1251.52	1.13574		1472.4	2.23716		1472.4	3.38119		1251.52	4.32551
					1473.65	0.00545		1252.81	1.12798		1473.65	2.22968		1473.65	3.38695		1252.81	4.34332
					1474.91	0.0111		1254.09	1.10911		1474.91	2.23133		1474.91	3.38595		1254.09	4.47878
					1476.17	0.01112		1255.38	1.09971		1476.17	2.23541		1476.17	3.37644		1255.38	4.55962
					1477.42	0.0104		1256.66	1.1013		1477.42	2.23871		1477.42	3.36863		1256.66	4.70675
					1478.68	0.01925		1257.94	1.09803		1478.68	2.24425		1478.68	3.35664		1257.94	4.8106
					1479.93	0.0226		1259.23	1.10018		1479.93	2.25569		1479.93	3.34268		1259.23	4.86248
					1481.19	0.03404		1260.51	1.09347		1481.19	2.25787		1481.19	3.32905		1260.51	4.87736
					1482.44	0.04014		1261.8	1.08997		1482.44	2.25651		1482.44	3.316		1261.8	4.85173
					1483.7	0.05202		1263.08	1.09526		1483.7	2.25022		1483.7	3.31911		1263.08	4.87397
					1484.95	0.06038		1264.36	1.09817		1484.95	2.25231		1484.95	3.31046		1264.36	4.83997
					1486.21	0.06954		1265.65	1.09531		1486.21	2.23577		1486.21	3.3063		1265.65	4.78045
					1487.46	0.08377		1266.93	1.09364		1487.46	2.22791		1487.46	3.31474		1266.93	4.79366
					1488.71	0.09406		1268.21	1.10177		1488.71	2.22658		1488.71	3.31166		1268.21	4.69149
					1489.97	0.10822		1269.49	1.11423		1489.97	2.22139		1489.97	3.31167		1269.49	4.70987
					1491.22	0.12953		1270.78	1.1229		1491.22	2.21717		1491.22	3.32648		1270.78	4.69152
					1492.48	0.15133		1272.06	1.11533		1492.48	2.21871		1492.48	3.33297		1272.06	4.63186
					1493.73	0.17316		1273.34	1.11899		1493.73	2.22322		1493.73	3.32535		1273.34	4.56707
					1494.98	0.19265		1274.62	1.11807		1494.98	2.22465		1494.98	3.32366		1274.62	4.47551
					1496.24	0.2129		1275.9	1.12746		1496.24	2.21992		1496.24	3.3133		1275.9	4.45152
					1497.49	0.22751		1277.18	1.13396		1497.49	2.21314		1497.49	3.30393		1277.18	4.47877
					1498.74	0.2386		1278.47	1.13431		1498.74	2.20541		1498.74	3.29992		1278.47	4.57714
					1499.99	0.24604		1279.75	1.14538		1499.99	2.20514		1499.99	3.31089		1279.75	4.67243
					1501.24	0.23581		1281.03	1.16168		1501.24	2.2057		1501.24	3.29382		1281.03	4.7127
					1502.5	0.23191		1282.31	1.1733		1502.5	2.20669		1502.5	3.3024		1282.31	4.81664
					1503.75	0.2308		1283.59	1.1846		1503.75	2.20836		1503.75	3.30491		1283.59	4.87681
					1505	0.2235		1284.87	1.1912		1505	2.21298		1505	3.31821		1284.87	4.89517
					1506.25	0.21426		1286.15	1.21112		1506.25	2.21774		1506.25	3.3205		1286.15	4.9088
					1507.5	0.20447		1287.43	1.23488		1507.5	2.22101		1507.5	3.324		1287.43	4.85627
					1508.75	0.19325		1288.71	1.24442		1508.75	2.21843		1508.75	3.32303		1288.71	4.85889
					1510.01	0.18591		1289.99	1.2485		1510.01	2.21296		1510.01	3.33568		1289.99	4.88208
					1511.26	0.17231		1291.27	1.24534		1511.26	2.21257		1511.26	3.33464		1291.27	4.86589
					1512.51	0.1568		1292.55	1.24411		1512.51	2.21696		1512.51	3.33429		1292.55	4.71373
					1513.76	0.13569		1293.82	1.22853		1513.76	2.21928		1513.76	3.32412		1293.82	4.6143
					1515.01	0.12117		1295.1	1.21185		1515.01	2.21384		1515.01	3.33712		1295.1	4.56327
					1516.26	0.11431		1296.38	1.1881		1516.26	2.21153		1516.26	3.31575		1296.38	4.50644
					1517.51	0.10843		1297.66	1.18817		1517.51	2.21478		1517.51	3.32775		1297.66	4.45929
					1518.76	0.11001		1298.94	1.18227		1518.76	2.21308		1518.76	3.32202		1298.94	4.44622
					1520.01	0.11039		1300.22	1.18799		1520.01	2.21318		1520.01	3.32651		1300.22	4.42637
					1521.26	0.12152		1301.49	1.17515		1521.26	2.20986		1521.26	3.34253		1301.49	4.43131
					1522.5	0.13418		1302.77	1.16596		1522.5	2.20398		1522.5	3.3416		1302.77	4.52077
					1523.75	0.14343		1304.05	1.15473		1523.75	2.20829		1523.75	3.3349		1304.05	4.54891
					1525	0.1539		1305.33	1.14746		1525	2.21881		1525	3.33345		1305.33	4.53977
					1526.25	0.15837		1306.6	1.13767		1526.25	2.22255		1526.25	3.32939		1306.6	4.54278
					1527.5	0.15864		1307.88	1.12596		1527.5	2.22465		1527.5	3.33846		1307.88	4.52676
					1528.75	0.15612		1309.16	1.1182		1528.75	2.23187		1528.75	3.34008		1309.16	4.4904
					1530	0.14771		1310.43	1.12848		1530	2.2381		1530	3.34732		1310.43	4.41581
					1531.24	0.13964		1311.71	1.1298		1531.24	2.24175		1531.24	3.35144		1311.71	4.36568
					1532.49	0.12206		1312.99	1.13903		1532.49	2.24876		1532.49	3.36028		1312.99	4.32581
					1533.74	0.11675		1314.26	1.13479		1533.74	2.25664		1533.74	3.36141		1314.26	4.33415
					1534.99	0.10861		1315.54	1.12444		1534.99	2.26107		1534.99	3.35419		1315.54	4.40823
					1536.23	0.10956		1316.81	1.12121		1536.23	2.2668		1536.23	3.34899		1316.81	4.44569
					1537.48	0.10714		1318.09	1.12754		1537.48	2.27002		1537.48	3.34137		1318.09	4.46822
					1538.73	0.10839		1319.36	1.12552		1538.73	2.27602		1538.73	3.35042		1319.36	4.46506
					1539.97	0.10712		1320.64	1.11472		1539.97	2.29772		1539.97	3.37347		1320.64	4.46257
					1541.22	0.10118		1321.91	1.11723		1541.22	2.3067		1541.22	3.38339		1321.91	4.41737
					1542.47	0.09966		1323.19	1.11699		1542.47	2.31108		1542.47	3.39709		1323.19	4.38949
					1543.71	0.10271		1324.46	1.12237		1543.71	2.32671		1543.71	3.41642		1324.46	4.40553
					1544.96	0.10134		1325.74	1.13038		1544.96	2.33995		1544.96	3.42967		1325.74	4.44969
					1546.2	0.10746		1327.01	1.13985		1546.2	2.35057		1546.2	3.45783		1327.01	4.49408
					1547.45	0.11304		1328.29	1.15111		1547.45	2.36309		1547.45	3.4873		1328.29	4.50781
					1548.7	0.12493		1329.56	1.17268		1548.7	2.36873		1548.7	3.51131		1329.56	4.4936
					1549.94	0.13694		1330.83	1.19575		1549.94	2.38722		1549.94	3.53756		1330.83	4.50894
					1551.19	0.15193		1332.11	1.20982		1551.19	2.40462		1551.19	3.57841		1332.11	4.45738
					1552.43	0.16342		1333.38	1.21918		1552.43	2.43036		1552.43	3.60317		1333.38	4.47746
					1553.67	0.1717		1334.65	1.22497		1553.67	2.43383		1553.67	3.6253		1334.65	4.46941
					1554.92	0.18164		1335.92	1.22683		1554.92	2.43393		1554.92	3.67134		1335.92	4.51449
					1556.16	0.19026		1337.2	1.22803		1556.16	2.44702		1556.16	3.71354		1337.2	4.48516
					1557.41	0.19315		1338.47	1.23033		1557.41	2.45972		1557.41	3.7776		1338.47	4.55071
					1558.65	0.19948		1339.74	1.23499		1558.65	2.46979		1558.65	3.8589		1339.74	4.60162
					1559.9	0.20326		1341.01	1.24184		1559.9	2.49529		1559.9	3.93851		1341.01	4.64693
					1561.14	0.20824		1342.29	1.24117		1561.14	2.51397		1561.14	4.01277		1342.29	4.64859
					1562.38	0.21797		1343.56	1.25463		1562.38	2.54187		1562.38	4.08919		1343.56	4.75686
					1563.63	0.22136		1344.83	1.26657		1563.63	2.56992		1563.63	4.14294		1344.83	4.80828
					1564.87	0.22257		1346.1	1.29307		1564.87	2.60305		1564.87	4.17542		1346.1	4.91127
					1566.11	0.22153		1347.37	1.29906		1566.11	2.62443		1566.11	4.22234		1347.37	5.03303
					1567.35	0.21295		1348.64	1.29961		1567.35	2.64172		1567.35	4.27001		1348.64	5.13795
					1568.6	0.20217		1349.91	1.31203		1568.6	2.65665		1568.6	4.28766		1349.91	5.15215
					1569.84	0.19012		1351.18	1.31838		1569.84	2.66908		1569.84	4.3		1351.18	5.3484
					1571.08	0.18638		1352.45	1.32966		1571.08	2.66635		1571.08	4.27314		1352.45	5.39722
					1572.32	0.17621		1353.72	1.3418		1572.32	2.66593		1572.32	4.21339		1353.72	5.4
					1573.57	0.15878		1354.99	1.36425		1573.57	2.6475		1573.57	4.12654		1354.99	5.31376
					1574.81	0.14792		1356.27	1.38977		1574.81	2.6182		1574.81	4.03467		1356.27	5.29432
					1576.05	0.13752		1357.53	1.41469		1576.05	2.59187		1576.05	3.91941		1357.53	5.15278
					1577.29	0.13149		1358.8	1.44896		1577.29	2.56663		1577.29	3.80516		1358.8	5.0117
					1578.53	0.132		1360.07	1.47665		1578.53	2.53593		1578.53	3.72757		1360.07	4.92985
					1579.77	0.13175		1361.34	1.48919		1579.77	2.51454		1579.77	3.66924		1361.34	4.76526
					1581.01	0.13458		1362.61	1.51221		1581.01	2.49029		1581.01	3.61078		1362.61	4.65215
					1582.25	0.14359		1363.88	1.49481		1582.25	2.46822		1582.25	3.56797		1363.88	4.67494
					1583.49	0.15495		1365.15	1.48699		1583.49	2.4531		1583.49	3.51603		1365.15	4.55044
					1584.73	0.15469		1366.42	1.47084		1584.73	2.43804		1584.73	3.46791		1366.42	4.52547
					1585.97	0.1511		1367.69	1.465		1585.97	2.42462		1585.97	3.43149		1367.69	4.46075
					1587.21	0.1543		1368.95	1.45007		1587.21	2.40435		1587.21	3.41169		1368.95	4.43941
					1588.45	0.15859		1370.22	1.43723		1588.45	2.39797		1588.45	3.39446		1370.22	4.36462
					1589.69	0.16165		1371.49	1.42981		1589.69	2.39048		1589.69	3.38644		1371.49	4.3797
					1590.93	0.17453		1372.76	1.43933		1590.93	2.37109		1590.93	3.39077		1372.76	4.37796
					1592.17	0.17952		1374.02	1.44175		1592.17	2.37417		1592.17	3.40396		1374.02	4.32975
					1593.41	0.18215		1375.29	1.43366		1593.41	2.36509		1593.41	3.40458		1375.29	4.40547
					1594.65	0.18602		1376.56	1.39844		1594.65	2.35416		1594.65	3.41188		1376.56	4.47629
					1595.89	0.18221		1377.82	1.3817		1595.89	2.34652		1595.89	3.40375		1377.82	4.51275
					1597.13	0.17023		1379.09	1.36287		1597.13	2.32894		1597.13	3.39414		1379.09	4.58787
					1598.37	0.16506		1380.36	1.35735		1598.37	2.319		1598.37	3.38268		1380.36	4.66741
					1599.6	0.15771		1381.62	1.35179		1599.6	2.3073		1599.6	3.37445		1381.62	4.70359
					1600.84	0.14458		1382.89	1.34676		1600.84	2.30873		1600.84	3.37025		1382.89	4.66229
					1602.08	0.13101		1384.15	1.36802		1602.08	2.3023		1602.08	3.37562		1384.15	4.69203
					1603.32	0.12703		1385.42	1.38805		1603.32	2.29011		1603.32	3.37536		1385.42	4.70761
					1604.55	0.11211		1386.69	1.40646		1604.55	2.29448		1604.55	3.36441		1386.69	4.73013
					1605.79	0.10124		1387.95	1.40122		1605.79	2.29105		1605.79	3.35494		1387.95	4.71854
					1607.03	0.0915		1389.22	1.39144		1607.03	2.29134		1607.03	3.34071		1389.22	4.69882
					1608.27	0.08161		1390.48	1.38717		1608.27	2.28728		1608.27	3.33322		1390.48	4.70209
					1609.5	0.07465		1391.75	1.37295		1609.5	2.27581		1609.5	3.31913		1391.75	4.73219
					1610.74	0.0746		1393.01	1.35282		1610.74	2.27375		1610.74	3.30271		1393.01	4.76242
					1611.97	0.07166		1394.28	1.32479		1611.97	2.26651		1611.97	3.29952		1394.28	4.72742
					1613.21	0.07025		1395.54	1.30162		1613.21	2.25997		1613.21	3.30338		1395.54	4.65326
					1614.45	0.06856		1396.8	1.28468		1614.45	2.25944		1614.45	3.30927		1396.8	4.6831
					1615.68	0.06833		1398.07	1.24765		1615.68	2.24978		1615.68	3.32211		1398.07	4.67864
					1616.92	0.06872		1399.33	1.22203		1616.92	2.24419		1616.92	3.31793		1399.33	4.70093
					1618.15	0.07587		1400.59	1.19116		1618.15	2.2419		1618.15	3.32395		1400.59	4.68161
					1619.39	0.07682		1401.86	1.17229		1619.39	2.2368		1619.39	3.30383		1401.86	4.76725
					1620.62	0.079		1403.12	1.16332		1620.62	2.23395		1620.62	3.29422		1403.12	4.8546
					1621.86	0.08794		1404.38	1.14449		1621.86	2.23256		1621.86	3.29352		1404.38	4.92092
					1623.09	0.09956		1405.65	1.13477		1623.09	2.23791		1623.09	3.28846		1405.65	4.92614
					1624.33	0.11538		1406.91	1.13439		1624.33	2.23262		1624.33	3.29044		1406.91	4.93966
					1625.56	0.13713		1408.17	1.12387		1625.56	2.238		1625.56	3.29323		1408.17	4.95249
					1626.8	0.15411		1409.43	1.12211		1626.8	2.24733		1626.8	3.29699		1409.43	4.94014
					1628.03	0.17479		1410.7	1.10497		1628.03	2.24281		1628.03	3.3122		1410.7	4.83511
					1629.26	0.19942		1411.96	1.10864		1629.26	2.24347		1629.26	3.32323		1411.96	4.74667
					1630.5	0.23369		1413.22	1.10969		1630.5	2.24096		1630.5	3.32471		1413.22	4.69028
					1631.73	0.2606		1414.48	1.11132		1631.73	2.23113		1631.73	3.31038		1414.48	4.6692
					1632.97	0.30344		1415.74	1.10399		1632.97	2.23197		1632.97	3.3078		1415.74	4.6159
					1634.2	0.35512		1417	1.09413		1634.2	2.22824		1634.2	3.3211		1417	4.58326
					1635.43	0.41989		1418.26	1.0977		1635.43	2.22407		1635.43	3.32198		1418.26	4.52941
					1636.66	0.49311		1419.52	1.11258		1636.66	2.21798		1636.66	3.30932		1419.52	4.50613
					1637.9	0.57401		1420.78	1.11678		1637.9	2.22088		1637.9	3.30922		1420.78	4.56853
					1639.13	0.65648		1422.04	1.12369		1639.13	2.21674		1639.13	3.30486		1422.04	4.54826
					1640.36	0.74209		1423.3	1.11973		1640.36	2.212		1640.36	3.30708		1423.3	4.48017
					1641.59	0.82399		1424.56	1.13434		1641.59	2.20828		1641.59	3.31071		1424.56	4.41921
					1642.83	0.90623		1425.82	1.14431		1642.83	2.20401		1642.83	3.30958		1425.82	4.36986
					1644.06	0.96213		1427.08	1.15657		1644.06	2.20142		1644.06	3.29802		1427.08	4.39893
					1645.29	0.99593		1428.34	1.14901		1645.29	2.20774		1645.29	3.29653		1428.34	4.35927
					1646.52	1		1429.6	1.15847		1646.52	2.20581		1646.52	3.29616		1429.6	4.36811
					1647.75	0.96642		1430.86	1.1704		1647.75	2.20982		1647.75	3.2952		1430.86	4.36952
					1648.98	0.89415		1432.12	1.17977		1648.98	2.2145		1648.98	3.29588		1432.12	4.33152
					1650.21	0.79489		1433.38	1.17961		1650.21	2.2088		1650.21	3.30501		1433.38	4.37194
					1651.44	0.68404		1434.64	1.18455		1651.44	2.20904		1651.44	3.31406		1434.64	4.39314
					1652.68	0.56956		1435.9	1.19354		1652.68	2.21398		1652.68	3.32455		1435.9	4.38028
					1653.91	0.46305		1437.15	1.20556		1653.91	2.21428		1653.91	3.32488		1437.15	4.42446
					1655.14	0.37381		1438.41	1.21833		1655.14	2.21537		1655.14	3.32837		1438.41	4.45931
					1656.36	0.295		1439.67	1.23389		1656.36	2.22002		1656.36	3.31987		1439.67	4.59691
					1657.59	0.23172		1440.93	1.23195		1657.59	2.21963		1657.59	3.32193		1440.93	4.60248
					1658.82	0.18578		1442.19	1.23979		1658.82	2.21824		1658.82	3.32396		1442.19	4.6702
					1660.05	0.13997		1443.44	1.23317		1660.05	2.21758		1660.05	3.30895		1443.44	4.69244
					1661.28	0.10317		1444.7	1.2139		1661.28	2.21267		1661.28	3.31021		1444.7	4.62603
					1662.51	0.07889		1445.96	1.19859		1662.51	2.20388		1662.51	3.29772		1445.96	4.57655
					1663.74	0.06709		1447.21	1.19034		1663.74	2.20332		1663.74	3.29606		1447.21	4.56971
					1664.97	0.05762		1448.47	1.18458		1664.97	2.20562		1664.97	3.28049		1448.47	4.57313
					1666.2	0.05263		1449.73	1.18417		1666.2	2.21149		1666.2	3.27419		1449.73	4.62074
					1667.43	0.04627		1450.98	1.1852		1667.43	2.21641		1667.43	3.28151		1450.98	4.61534
					1668.66	0.04055		1452.24	1.18475		1668.66	2.22273		1668.66	3.29382		1452.24	4.68973
					1669.88	0.03357		1453.49	1.18368		1669.88	2.22342		1669.88	3.30538		1453.49	4.69453
					1671.11	0.02371		1454.75	1.17817		1671.11	2.22201		1671.11	3.3149		1454.75	4.69948
					1672.34	0.01769		1456	1.18013		1672.34	2.2194		1672.34	3.31733		1456	4.66112
					1673.57	0.0104		1457.26	1.1726		1673.57	2.2117		1673.57	3.325		1457.26	4.59441
					1674.79	0.0114		1458.52	1.165		1674.79	2.20575		1674.79	3.31419		1458.52	4.57678
					1676.02	0.01341		1459.77	1.16698		1676.02	2.20161		1676.02	3.29629		1459.77	4.58938
					1677.25	0.01363		1461.02	1.17385		1677.25	2.20339		1677.25	3.28769		1461.02	4.64742
					1678.48	0.01469		1462.28	1.17211		1678.48	2.20341		1678.48	3.28458		1462.28	4.73737
					1679.7	0.01129		1463.53	1.17314		1679.7	2.20258		1679.7	3.28577		1463.53	4.84136
					1680.93	0.00876		1464.79	1.15922		1680.93	2.2085		1680.93	3.28373		1464.79	4.96476
					1682.15	0.000513731		1466.04	1.15675		1682.15	2.2081		1682.15	3.29671		1466.04	5.00837
					1683.38	-0.00587		1467.3	1.14883		1683.38	2.20797		1683.38	3.30603		1467.3	5.01143
					1684.61	-0.00378		1468.55	1.15932		1684.61	2.20498		1684.61	3.32134		1468.55	4.94292
					1685.83	-0.00698		1469.8	1.16316		1685.83	2.20054		1685.83	3.32813		1469.8	4.85412
					1687.06	-0.00362		1471.06	1.16923		1687.06	2.2044		1687.06	3.32189		1471.06	4.83241
					1688.28	-0.00462		1472.31	1.17934		1688.28	2.20121		1688.28	3.31534		1472.31	4.7502
					1689.51	-0.00724		1473.56	1.19658		1689.51	2.20329		1689.51	3.32109		1473.56	4.77588
					1690.73	-0.0033		1474.82	1.18709		1690.73	2.20272		1690.73	3.31804		1474.82	4.84604
					1691.96	-0.00477		1476.07	1.18029		1691.96	2.20873		1691.96	3.30816		1476.07	4.86605
					1693.18	-0.00176		1477.32	1.17413		1693.18	2.21272		1693.18	3.3026		1477.32	4.95982
					1694.41	-0.00646		1478.57	1.17431		1694.41	2.20978		1694.41	3.30612		1478.57	5.06162
					1695.63	-0.00373		1479.82	1.1646		1695.63	2.21364		1695.63	3.29896		1479.82	5.05563
					1696.86	-0.00117		1481.08	1.17192		1696.86	2.20695		1696.86	3.30051		1481.08	4.98087
					1698.08	0.00338		1482.33	1.1694		1698.08	2.21379		1698.08	3.30738		1482.33	4.91518
					1699.3	0.00372		1483.58	1.17513		1699.3	2.21542		1699.3	3.30103		1483.58	4.81252
					1700.53	0.0061		1484.83	1.17844		1700.53	2.21195		1700.53	3.31392		1484.83	4.7002
					1701.75	0.00787		1486.08	1.17402		1701.75	2.2099		1701.75	3.31502		1486.08	4.59596
					1702.98	0.01088		1487.33	1.15363		1702.98	2.21172		1702.98	3.32132		1487.33	4.47895
					1704.2	0.00756		1488.58	1.14236		1704.2	2.21169		1704.2	3.31501		1488.58	4.35803
					1705.42	0.013		1489.83	1.13279		1705.42	2.20963		1705.42	3.31821		1489.83	4.42873
					1706.64	0.01197		1491.08	1.12042		1706.64	2.20547		1706.64	3.30317		1491.08	4.47344
					1707.87	0.01345		1492.33	1.11623		1707.87	2.20645		1707.87	3.29965		1492.33	4.45829
					1709.09	0.00921		1493.58	1.12173		1709.09	2.20327		1709.09	3.30755		1493.58	4.49289
					1710.31	0.01045		1494.83	1.1319		1710.31	2.21589		1710.31	3.31775		1494.83	4.48429
					1711.53	0.00573		1496.08	1.13638		1711.53	2.21392		1711.53	3.31876		1496.08	4.53406
					1712.76	0.00941		1497.33	1.13777		1712.76	2.20801		1712.76	3.33191		1497.33	4.60725
					1713.98	0.0027		1498.58	1.14178		1713.98	2.20519		1713.98	3.32841		1498.58	4.5929
					1715.2	-0.000898449		1499.83	1.13881		1715.2	2.20807		1715.2	3.33007		1499.83	4.6372
					1716.42	-0.00117		1501.08	1.13508		1716.42	2.20343		1716.42	3.32995		1501.08	4.65833
					1717.64	-0.00218		1502.33	1.11791		1717.64	2.20676		1717.64	3.32491		1502.33	4.68918
					1718.86	0.000642356		1503.58	1.11712		1718.86	2.20537		1718.86	3.31029		1503.58	4.67447
					1720.08	0.00215		1504.83	1.11799		1720.08	2.21184		1720.08	3.30147		1504.83	4.66722
					1721.3	0.00665		1506.08	1.12778		1721.3	2.21347		1721.3	3.30218		1506.08	4.64673
					1722.52	0.01096		1507.32	1.13001		1722.52	2.21557		1722.52	3.30615		1507.32	4.62191
					1723.75	0.01161		1508.57	1.1352		1723.75	2.21011		1723.75	3.30129		1508.57	4.72289
					1724.97	0.02003		1509.82	1.14181		1724.97	2.20275		1724.97	3.30605		1509.82	4.6987
					1726.19	0.01983		1511.07	1.14557		1726.19	2.20901		1726.19	3.30605		1511.07	4.70014
					1727.41	0.02289		1512.31	1.13317		1727.41	2.20879		1727.41	3.31633		1512.31	4.66898
					1728.63	0.024		1513.56	1.13592		1728.63	2.20434		1728.63	3.32448		1513.56	4.65449
					1729.84	0.02454		1514.81	1.14171		1729.84	2.20758		1729.84	3.32483		1514.81	4.63664
					1731.06	0.02137		1516.05	1.15109		1731.06	2.2063		1731.06	3.32423		1516.05	4.61496
					1732.28	0.01554		1517.3	1.16577		1732.28	2.21024		1732.28	3.30893		1517.3	4.59785
					1733.5	0.01392		1518.55	1.17742		1733.5	2.20914		1733.5	3.3035		1518.55	4.57068
					1734.72	0.01129		1519.79	1.16819		1734.72	2.20616		1734.72	3.29689		1519.79	4.62975
					1735.94	0.00973		1521.04	1.19927		1735.94	2.20528		1735.94	3.29254		1521.04	4.74585
					1737.16	0.01096		1522.29	1.19316		1737.16	2.2057		1737.16	3.29288		1522.29	4.72131
					1738.38	0.00946		1523.53	1.19684		1738.38	2.20887		1738.38	3.30338		1523.53	4.74109
					1739.59	0.01026		1524.78	1.17984		1739.59	2.2042		1739.59	3.31605		1524.78	4.70637
					1740.81	0.00934		1526.02	1.18202		1740.81	2.19663		1740.81	3.31915		1526.02	4.7205
					1742.03	0.00729		1527.27	1.18685		1742.03	2.19262		1742.03	3.3229		1527.27	4.74541
					1743.25	-0.00478		1528.51	1.194		1743.25	2.1897		1743.25	3.31027		1528.51	4.69365
					1744.46	-0.0093		1529.76	1.20583		1744.46	2.19444		1744.46	3.29741		1529.76	4.68195
					1745.68	-0.00631		1531	1.20839		1745.68	2.19698		1745.68	3.28768		1531	4.65069
					1746.9	0.000770335		1532.25	1.20344		1746.9	2.1982		1746.9	3.28808		1532.25	4.68397
					1748.12	-0.00102		1533.49	1.22422		1748.12	2.20182		1748.12	3.28789		1533.49	4.69635
					1749.33	0.0016		1534.73	1.22187		1749.33	2.20798		1749.33	3.28056		1534.73	4.69712
					1750.55	0.0074		1535.98	1.23946		1750.55	2.21015		1750.55	3.29778		1535.98	4.66649
					1751.77	0.00786		1537.22	1.22473		1751.77	2.20742		1751.77	3.30718		1537.22	4.67345
					1752.98	0.00581		1538.47	1.2172		1752.98	2.20668		1752.98	3.30983		1538.47	4.61284
					1754.2	0.00199		1539.71	1.19808		1754.2	2.20553		1754.2	3.29497		1539.71	4.6297
					1755.41	-0.0015		1540.95	1.19556		1755.41	2.20426		1755.41	3.26761		1540.95	4.652
					1756.63	0.000629884		1542.19	1.18062		1756.63	2.20563		1756.63	3.26873		1542.19	4.76056
					1757.85	0.00362		1543.44	1.16533		1757.85	2.2112		1757.85	3.26655		1543.44	4.80209
					1759.06	0.00731		1544.68	1.15852		1759.06	2.21207		1759.06	3.26784		1544.68	4.86454
					1760.28	0.00343		1545.92	1.15473		1760.28	2.22151		1760.28	3.26624		1545.92	4.8905
					1761.49	0.00873		1547.17	1.14806		1761.49	2.22598		1761.49	3.27614		1547.17	4.9467
					1762.71	0.00639		1548.41	1.14517		1762.71	2.2312		1762.71	3.30467		1548.41	4.971
					1763.92	0.00744		1549.65	1.14896		1763.92	2.23273		1763.92	3.32569		1549.65	5.01664
					1765.13	0.00675		1550.89	1.14322		1765.13	2.2315		1765.13	3.33385		1550.89	4.97553
					1766.35	0.00656		1552.13	1.13897		1766.35	2.225		1766.35	3.32766		1552.13	5.03645
					1767.56	0.01179		1553.37	1.14415		1767.56	2.21		1767.56	3.32304		1553.37	5.14036
					1768.78	0.0155		1554.62	1.13989		1768.78	2.20402		1768.78	3.33033		1554.62	5.23934
					1769.99	0.01313		1555.86	1.12982		1769.99	2.20255		1769.99	3.32251		1555.86	5.283
					1771.2	0.01415		1557.1	1.14347		1771.2	2.19213		1771.2	3.3105		1557.1	5.25023
					1772.42	0.0114		1558.34	1.1274		1772.42	2.19683		1772.42	3.2964		1558.34	5.12542
					1773.63	0.00684		1559.58	1.12861		1773.63	2.19942		1773.63	3.30025		1559.58	5.01424
					1774.84	0.00597		1560.82	1.1383		1774.84	2.20571		1774.84	3.29694		1560.82	5.02023
					1776.06	0.00585		1562.06	1.13995		1776.06	2.20901		1776.06	3.29182		1562.06	4.96436
					1777.27	-0.0013		1563.3	1.1395		1777.27	2.21068		1777.27	3.28186		1563.3	4.84265
					1778.48	0.0016		1564.54	1.1453		1778.48	2.21293		1778.48	3.27242		1564.54	4.83403
					1779.69	0.00535		1565.78	1.16045		1779.69	2.20268		1779.69	3.27419		1565.78	4.82975
					1780.91	0.00684		1567.02	1.17632		1780.91	2.20261		1780.91	3.27493		1567.02	4.8449
					1782.12	0.00637		1568.26	1.19348		1782.12	2.199		1782.12	3.27061		1568.26	4.78924
					1783.33	0.0123		1569.5	1.23214		1783.33	2.20415		1783.33	3.2713		1569.5	4.73657
					1784.54	0.01435		1570.74	1.25626		1784.54	2.2009		1784.54	3.2755		1570.74	4.65098
					1785.75	0.01087		1571.97	1.31036		1785.75	2.20107		1785.75	3.28437		1571.97	4.63191
					1786.97	0.019		1573.21	1.35356		1786.97	2.20889		1786.97	3.2831		1573.21	4.6501
					1788.18	0.01517		1574.45	1.38696		1788.18	2.21174		1788.18	3.28776		1574.45	4.58417
					1789.39	0.0121		1575.69	1.42524		1789.39	2.21465		1789.39	3.28969		1575.69	4.48476
					1790.6	0.01408		1576.93	1.48312		1790.6	2.21787		1790.6	3.29489		1576.93	4.49889
					1791.81	0.01444		1578.16	1.54934		1791.81	2.21413		1791.81	3.30898		1578.16	4.43953
					1793.02	0.0137		1579.4	1.60756		1793.02	2.21221		1793.02	3.31434		1579.4	4.42013
					1794.23	0.00974		1580.64	1.67715		1794.23	2.20938		1794.23	3.3142		1580.64	4.37969
					1795.44	0.00741		1581.88	1.76192		1795.44	2.21631		1795.44	3.31981		1581.88	4.4338
					1796.65	0.000924027		1583.11	1.84475		1796.65	2.19907		1796.65	3.317		1583.11	4.42893
					1797.86	-0.00568		1584.35	1.92177		1797.86	2.18884		1797.86	3.30689		1584.35	4.51934
					1799.07	0.000836483		1585.59	1.97896		1799.07	2.19128		1799.07	3.30261		1585.59	4.59055
					1800.28	0.000816888		1586.82	2.04826		1800.28	2.18339		1800.28	3.3033		1586.82	4.62993
					1801.49	0.00422		1588.06	2.08192		1801.49	2.18938		1801.49	3.29933		1588.06	4.63849
					1802.7	0.0067		1589.3	2.1		1802.7	2.19227		1802.7	3.29366		1589.3	4.68233
					1803.91	0.0071		1590.53	2.06231		1803.91	2.19369		1803.91	3.28489		1590.53	4.63729
					1805.12	0.00802		1591.77	2.00758		1805.12	2.19971		1805.12	3.28198		1591.77	4.59491
					1806.32	0.00541		1593.01	1.96373		1806.32	2.20811		1806.32	3.28163		1593.01	4.52599
					1807.53	-4.73309e-05		1594.24	1.89375		1807.53	2.21911		1807.53	3.27676		1594.24	4.44674
					1808.74	-0.000829799		1595.48	1.82705		1808.74	2.21894		1808.74	3.26583		1595.48	4.39606
					1809.95	0.0012		1596.71	1.73722		1809.95	2.21992		1809.95	3.27177		1596.71	4.42914
					1811.16	0.00532		1597.95	1.65724		1811.16	2.21702		1811.16	3.28259		1597.95	4.42012
					1812.37	0.00739		1599.18	1.59995		1812.37	2.21918		1812.37	3.29459		1599.18	4.37278
					1813.57	0.00372		1600.42	1.54493		1813.57	2.21961		1813.57	3.29578		1600.42	4.41389
					1814.78	0.00293		1601.65	1.48351		1814.78	2.20915		1814.78	3.29312		1601.65	4.49952
					1815.99	-0.000168234		1602.88	1.41182		1815.99	2.20132		1815.99	3.28796		1602.88	4.53666
					1817.19	0.0041		1604.12	1.4		1817.19	2.19813		1817.19	3.29593		1604.12	4.50402
					1818.4	-0.000782048		1605.35	1.41039		1818.4	2.19968		1818.4	3.30132		1605.35	4.51837
					1819.61	-0.00422		1606.59	1.42402		1819.61	2.20531		1819.61	3.30248		1606.59	4.48325
					1820.81	0.00372		1607.82	1.47837		1820.81	2.20492		1820.81	3.29029		1607.82	4.53211
					1822.02	0.00365		1609.05	1.54254		1822.02	2.20643		1822.02	3.29589		1609.05	4.4791
					1823.23	0.00176		1610.29	1.61879		1823.23	2.20119		1823.23	3.29511		1610.29	4.42033
					1824.43	0.00287		1611.52	1.70558		1824.43	2.21369		1824.43	3.28954		1611.52	4.42114
					1825.64	-0.00101		1612.75	1.80405		1825.64	2.20938		1825.64	3.28454		1612.75	4.50118
					1826.84	-0.0035		1613.99	1.8978		1826.84	2.2074		1826.84	3.28003		1613.99	4.56071
					1828.05	-0.00336		1615.22	1.9817		1828.05	2.20737		1828.05	3.26557		1615.22	4.50464
					1829.26	-0.00272		1616.45	2.05965		1829.26	2.20507		1829.26	3.26809		1616.45	4.47194
					1830.46	-0.00875		1617.68	2.08639		1830.46	2.21399		1830.46	3.26949		1617.68	4.50396
					1831.67	-0.00943		1618.91	2.07546		1831.67	2.21603		1831.67	3.27039		1618.91	4.49359
					1832.87	-0.00526		1620.15	2.01795		1832.87	2.21562		1832.87	3.26763		1620.15	4.5003
					1834.07	-0.0046		1621.38	1.93635		1834.07	2.21529		1834.07	3.27895		1621.38	4.44331
					1835.28	-0.000159111		1622.61	1.82148		1835.28	2.21551		1835.28	3.28247		1622.61	4.47214
					1836.48	0.00422		1623.84	1.6922		1836.48	2.21252		1836.48	3.28024		1623.84	4.5129
					1837.69	0.00913		1625.07	1.56688		1837.69	2.20502		1837.69	3.28151		1625.07	4.48341
					1838.89	0.00827		1626.3	1.47506		1838.89	2.19895		1838.89	3.28028		1626.3	4.44103
					1840.1	0.00971		1627.53	1.3942		1840.1	2.19564		1840.1	3.28065		1627.53	4.37579
					1841.3	0.00606		1628.76	1.35156		1841.3	2.19191		1841.3	3.2917		1628.76	4.40755
					1842.5	-0.00186		1629.99	1.31396		1842.5	2.19362		1842.5	3.29572		1629.99	4.44062
					1843.71	-0.00872		1631.22	1.28338		1843.71	2.19856		1843.71	3.29095		1631.22	4.46852
					1844.91	-0.01503		1632.45	1.24781		1844.91	2.20927		1844.91	3.29067		1632.45	4.49549
					1846.11	-0.01565		1633.68	1.22828		1846.11	2.21454		1846.11	3.2866		1633.68	4.56445
					1847.32	-0.01509		1634.91	1.22445		1847.32	2.21842		1847.32	3.28185		1634.91	4.59429
					1848.52	-0.01107		1636.14	1.2054		1848.52	2.21667		1848.52	3.26634		1636.14	4.59485
					1849.72	-0.00332		1637.37	1.19014		1849.72	2.21929		1849.72	3.25669		1637.37	4.62933
					1850.92	-0.000260339		1638.6	1.17572		1850.92	2.21897		1850.92	3.25501		1638.6	4.63715
					1852.12	0.00194		1639.83	1.14921		1852.12	2.21702		1852.12	3.26972		1639.83	4.71347
					1853.33	0.00715		1641.06	1.15697		1853.33	2.22244		1853.33	3.2873		1641.06	4.82465
					1854.53	0.00751		1642.29	1.15151		1854.53	2.22402		1854.53	3.29995		1642.29	4.92071
					1855.73	0.00777		1643.52	1.14254		1855.73	2.22881		1855.73	3.29063		1643.52	5.06465
					1856.93	0.0063		1644.74	1.13129		1856.93	2.22919		1856.93	3.28465		1644.74	5.20325
					1858.13	0.00517		1645.97	1.12313		1858.13	2.22114		1858.13	3.28782		1645.97	5.30359
					1859.33	0.01043		1647.2	1.13167		1859.33	2.21813		1859.33	3.29124		1647.2	5.3733
					1860.53	0.01105		1648.43	1.1368		1860.53	2.21825		1860.53	3.27892		1648.43	5.39439
					1861.74	0.00953		1649.66	1.13464		1861.74	2.21931		1861.74	3.28019		1649.66	5.31437
					1862.94	0.00901		1650.88	1.12434		1862.94	2.21672		1862.94	3.28262		1650.88	5.12591
					1864.14	0.01106		1652.11	1.11615		1864.14	2.21643		1864.14	3.29336		1652.11	5.02509
					1865.34	0.01618		1653.34	1.11916		1865.34	2.21246		1865.34	3.30947		1653.34	4.8975
					1866.54	0.01198		1654.57	1.12317		1866.54	2.21059		1866.54	3.31615		1654.57	4.7416
					1867.74	0.01024		1655.79	1.1213		1867.74	2.20845		1867.74	3.30339		1655.79	4.6418
					1868.94	0.00794		1657.02	1.13372		1868.94	2.20708		1868.94	3.3027		1657.02	4.56571
					1870.14	0.00551		1658.24	1.13722		1870.14	2.20021		1870.14	3.29501		1658.24	4.53092
					1871.34	0.00961		1659.47	1.15389		1871.34	2.19982		1871.34	3.28643		1659.47	4.51272
					1872.53	0.00594		1660.7	1.16669		1872.53	2.20601		1872.53	3.26244		1660.7	4.45084
					1873.73	0.00624		1661.92	1.16023		1873.73	2.20683		1873.73	3.26281		1661.92	4.36236
					1874.93	0.00868		1663.15	1.14862		1874.93	2.21308		1874.93	3.26692		1663.15	4.32573
					1876.13	0.01047		1664.37	1.14263		1876.13	2.21842		1876.13	3.27461		1664.37	4.34616
					1877.33	0.00699		1665.6	1.12889		1877.33	2.20872		1877.33	3.28217		1665.6	4.36097
					1878.53	-0.000935439		1666.82	1.12247		1878.53	2.21198		1878.53	3.29924		1666.82	4.37503
					1879.73	-0.00236		1668.05	1.11179		1879.73	2.21502		1879.73	3.29012		1668.05	4.39473
					1880.92	-0.00171		1669.27	1.10919		1880.92	2.21473		1880.92	3.29693		1669.27	4.4436
					1882.12	-0.00183		1670.5	1.1089		1882.12	2.2096		1882.12	3.2898		1670.5	4.44733
					1883.32	-0.00356		1671.72	1.10741		1883.32	2.2065		1883.32	3.28264		1671.72	4.45459
					1884.52	0.00128		1672.95	1.10337		1884.52	2.20978		1884.52	3.27366		1672.95	4.46857
					1885.71	0.0015		1674.17	1.10391		1885.71	2.20429		1885.71	3.28036		1674.17	4.46248
					1886.91	0.00315		1675.39	1.10851		1886.91	2.20772		1886.91	3.28106		1675.39	4.40865
					1888.11	0.005		1676.62	1.10492		1888.11	2.21316		1888.11	3.27949		1676.62	4.40471
					1889.3	-0.00316		1677.84	1.106		1889.3	2.21435		1889.3	3.28839		1677.84	4.42758
					1890.5	-0.00615		1679.07	1.11412		1890.5	2.21776		1890.5	3.29328		1679.07	4.42154
					1891.7	-0.00442		1680.29	1.12207		1891.7	2.2132		1891.7	3.27985		1680.29	4.42015
					1892.9	-0.00252		1681.51	1.12829		1892.9	2.20389		1892.9	3.29644		1681.51	4.39734
					1894.09	-0.00125		1682.73	1.13433		1894.09	2.20372		1894.09	3.29166		1682.73	4.39823
					1895.29	0.0018		1683.96	1.12425		1895.29	2.19971		1895.29	3.29268		1683.96	4.38275
					1896.48	0.00799		1685.18	1.11666		1896.48	2.19785		1896.48	3.31478		1685.18	4.39373
					1897.68	0.00619		1686.4	1.1208		1897.68	2.19069		1897.68	3.32084		1686.4	4.40943
					1898.87	0.01189		1687.62	1.10005		1898.87	2.19138		1898.87	3.33225		1687.62	4.39618
					1900.07	0.01748		1688.85	1.08872		1900.07	2.2033		1900.07	3.33133		1688.85	4.43808
					1901.26	0.01291		1690.07	1.08948		1901.26	2.22042		1901.26	3.34023		1690.07	4.46351
					1902.46	0.01221		1691.29	1.09893		1902.46	2.22898		1902.46	3.32464		1691.29	4.46042
					1903.65	0.01976		1692.51	1.11639		1903.65	2.22554		1903.65	3.32023		1692.51	4.49232
					1904.85	0.01213		1693.73	1.13431		1904.85	2.22859		1904.85	3.31883		1693.73	4.44534
					1906.04	0.01244		1694.95	1.14611		1906.04	2.23487		1906.04	3.29377		1694.95	4.42641
					1907.24	0.0119		1696.17	1.15056		1907.24	2.23555		1907.24	3.27883		1696.17	4.34853
					1908.43	0.007		1697.39	1.15431		1908.43	2.23444		1908.43	3.28063		1697.39	4.37095
					1909.63	0.00445		1698.62	1.15725		1909.63	2.21495		1909.63	3.27747		1698.62	4.36149
					1910.82	0.00918		1699.83	1.13046		1910.82	2.21105		1910.82	3.28697		1699.83	4.32222
					1912.01	0.00739		1701.06	1.12341		1912.01	2.21184		1912.01	3.2868		1701.06	4.33427
					1913.21	0.00341		1702.28	1.11525		1913.21	2.22182		1913.21	3.29259		1702.28	4.35582
					1914.4	0.00828		1703.49	1.10198		1914.4	2.22382		1914.4	3.28344		1703.49	4.41426
					1915.59	0.01527		1704.72	1.10159		1915.59	2.22676		1915.59	3.30289		1704.72	4.45634
					1916.79	0.01395		1705.93	1.1076		1916.79	2.22279		1916.79	3.30393		1705.93	4.49082
					1917.98	0.0162		1707.15	1.11346		1917.98	2.22749		1917.98	3.30199		1707.15	4.48937
					1919.17	0.01472		1708.37	1.14218		1919.17	2.23276		1919.17	3.30282		1708.37	4.45768
					1920.36	0.0156		1709.59	1.15878		1920.36	2.22639		1920.36	3.30967		1709.59	4.46432
					1921.56	0.01577		1710.81	1.16026		1921.56	2.21142		1921.56	3.3151		1710.81	4.42763
					1922.75	0.0175		1712.03	1.15256		1922.75	2.21361		1922.75	3.31821		1712.03	4.38661
					1923.94	0.00747		1713.25	1.14847		1923.94	2.20874		1923.94	3.3151		1713.25	4.38909
					1925.13	0.00624		1714.47	1.14129		1925.13	2.21078		1925.13	3.31535		1714.47	4.37396
					1926.32	0.00788		1715.68	1.12782		1926.32	2.21485		1926.32	3.31075		1715.68	4.40673
					1927.51	0.00381		1716.9	1.12152		1927.51	2.21549		1927.51	3.31456		1716.9	4.42869
					1928.71	0.00611		1718.12	1.12397		1928.71	2.21167		1928.71	3.30607		1718.12	4.47493
					1929.9	-0.000599312		1719.34	1.13374		1929.9	2.21778		1929.9	3.30299		1719.34	4.48349
					1931.09	-0.00207		1720.55	1.15026		1931.09	2.22365		1931.09	3.30339		1720.55	4.49683
					1932.28	0.00183		1721.77	1.14847		1932.28	2.21886		1932.28	3.30904		1721.77	4.55505
					1933.47	0.00527		1722.99	1.14534		1933.47	2.22148		1933.47	3.309		1722.99	4.58957
					1934.66	0.011		1724.21	1.14602		1934.66	2.21761		1934.66	3.30383		1724.21	4.56252
					1935.85	0.00691		1725.42	1.14093		1935.85	2.20787		1935.85	3.29997		1725.42	4.54356
					1937.04	0.00927		1726.64	1.13567		1937.04	2.20743		1937.04	3.30449		1726.64	4.51567
					1938.23	0.00562		1727.86	1.13898		1938.23	2.22091		1938.23	3.31227		1727.86	4.50022
					1939.42	-0.00103		1729.07	1.13198		1939.42	2.21617		1939.42	3.31221		1729.07	4.46262
					1940.61	-0.00168		1730.29	1.12768		1940.61	2.22055		1940.61	3.31405		1730.29	4.3889
					1941.8	-0.00783		1731.5	1.12937		1941.8	2.21459		1941.8	3.3113		1731.5	4.35468
					1942.99	-0.00535		1732.72	1.12005		1942.99	2.22013		1942.99	3.31214		1732.72	4.29392
					1944.18	3.69893e-05		1733.93	1.12225		1944.18	2.21311		1944.18	3.31913		1733.93	4.32315
					1945.36	0.00873		1735.15	1.11968		1945.36	2.21446		1945.36	3.31431		1735.15	4.36152
					1946.55	0.01778		1736.37	1.10791		1946.55	2.20406		1946.55	3.30945		1736.37	4.40986
					1947.74	0.01868		1737.58	1.1085		1947.74	2.19874		1947.74	3.30952		1737.58	4.51382
					1948.93	0.02597		1738.8	1.10994		1948.93	2.20744		1948.93	3.29054		1738.8	4.60186
					1950.12	0.02433		1740.01	1.12277		1950.12	2.22191		1950.12	3.3068		1740.01	4.66686
					1951.31	0.01748		1741.22	1.13132		1951.31	2.22385		1951.31	3.30224		1741.22	4.62187
					1952.49	0.01293		1742.44	1.12681		1952.49	2.22931		1952.49	3.30797		1742.44	4.55397
					1953.68	0.00414		1743.65	1.12673		1953.68	2.22407		1953.68	3.31108		1743.65	4.48329
					1954.87	0.00393		1744.87	1.12577		1954.87	2.22651		1954.87	3.30582		1744.87	4.39171
					1956.06	0.00364		1746.08	1.12391		1956.06	2.22348		1956.06	3.30908		1746.08	4.34086
					1957.24	0.00412		1747.29	1.11222		1957.24	2.22832		1957.24	3.31525		1747.29	4.30497
					1958.43	0.00503		1748.51	1.09419		1958.43	2.21714		1958.43	3.32239		1748.51	4.3126
					1959.62	0.00614		1749.72	1.09955		1959.62	2.20792		1959.62	3.31481		1749.72	4.39774
					1960.8	0.01025		1750.93	1.09477		1960.8	2.21116		1960.8	3.32014		1750.93	4.40792
					1961.99	0.0126		1752.15	1.09454		1961.99	2.21175		1961.99	3.34066		1752.15	4.41635
					1963.18	0.00715		1753.36	1.09484		1963.18	2.2111		1963.18	3.32889		1753.36	4.40745
					1964.36	0.00645		1754.57	1.08374		1964.36	2.20681		1964.36	3.32761		1754.57	4.43048
					1965.55	0.00667		1755.78	1.08255		1965.55	2.2107		1965.55	3.32668		1755.78	4.48298
					1966.74	0.01143		1757	1.09089		1966.74	2.20747		1966.74	3.31849		1757	4.48978
					1967.92	0.0124		1758.21	1.09409		1967.92	2.21049		1967.92	3.31141		1758.21	4.50081
					1969.11	0.00637		1759.42	1.09204		1969.11	2.21364		1969.11	3.30769		1759.42	4.49352
					1970.29	0.00707		1760.63	1.09622		1970.29	2.20723		1970.29	3.31299		1760.63	4.50749
					1971.48	0.00733		1761.84	1.10768		1971.48	2.20011		1971.48	3.30612		1761.84	4.52795
					1972.66	0.00965		1763.05	1.10675		1972.66	2.2038		1972.66	3.31312		1763.05	4.41712
					1973.85	0.01471		1764.27	1.09625		1973.85	2.20367		1973.85	3.31329		1764.27	4.34203
					1975.03	0.00822		1765.48	1.10485		1975.03	2.20881		1975.03	3.29057		1765.48	4.3235
					1976.22	0.0088		1766.69	1.1025		1976.22	2.21802		1976.22	3.28594		1766.69	4.33489
					1977.4	0.01184		1767.9	1.10153		1977.4	2.23075		1977.4	3.29147		1767.9	4.3518
					1978.58	0.00872		1769.11	1.09955		1978.58	2.23185		1978.58	3.283		1769.11	4.37424
					1979.77	0.00541		1770.32	1.0998		1979.77	2.23015		1979.77	3.29166		1770.32	4.45924
					1980.95	0.000208644		1771.53	1.09507		1980.95	2.23129		1980.95	3.30539		1771.53	4.47887
					1982.14	0.00755		1772.74	1.09723		1982.14	2.23016		1982.14	3.31482		1772.74	4.47839
					1983.32	0.00823		1773.95	1.10652		1983.32	2.22175		1983.32	3.31868		1773.95	4.49023
					1984.5	0.00433		1775.16	1.12233		1984.5	2.22024		1984.5	3.32633		1775.16	4.40148
					1985.69	0.00545		1776.37	1.11886		1985.69	2.21837		1985.69	3.32741		1776.37	4.38042
					1986.87	0.00459		1777.58	1.1295		1986.87	2.21833		1986.87	3.31107		1777.58	4.40198
					1988.05	0.00581		1778.79	1.11052		1988.05	2.22023		1988.05	3.31101		1778.79	4.41482
					1989.23	0.00995		1779.99	1.09256		1989.23	2.22788		1989.23	3.31341		1779.99	4.35416
					1990.42	0.00734		1781.2	1.07923		1990.42	2.22467		1990.42	3.3018		1781.2	4.31151
					1991.6	0.00614		1782.41	1.08301		1991.6	2.21827		1991.6	3.30898		1782.41	4.30133
					1992.78	0.00913		1783.62	1.07848		1992.78	2.22115		1992.78	3.30187		1783.62	4.26748
					1993.96	0.0065		1784.83	1.07765		1993.96	2.21599		1993.96	3.27865		1784.83	4.24052
					1995.15	0.000965809		1786.04	1.09764		1995.15	2.20813		1995.15	3.28047		1786.04	4.31142
					1996.33	-0.00803		1787.24	1.11912		1996.33	2.19717		1996.33	3.27567		1787.24	4.35965
					1997.51	-0.00494		1788.45	1.12615		1997.51	2.18944		1997.51	3.27627		1788.45	4.42511
					1998.69	0.00149		1789.66	1.13476		1998.69	2.18822		1998.69	3.28306		1789.66	4.50796
					1999.87	0.00308		1790.87	1.12511		1999.87	2.19598		1999.87	3.28704		1790.87	4.52027
								1792.07	1.12017								1792.07	4.50854
								1793.28	1.11398								1793.28	4.47729
								1794.49	1.1155								1794.49	4.43274
								1795.69	1.10798								1795.69	4.40908
								1796.9	1.10148								1796.9	4.39037
								1798.11	1.10143								1798.11	4.41048
								1799.31	1.10396								1799.31	4.42638
								1800.52	1.10248								1800.52	4.39736
								1801.72	1.10345								1801.72	4.40382
								1802.93	1.09971								1802.93	4.40189
								1804.14	1.09256								1804.14	4.40039
								1805.34	1.0862								1805.34	4.40278
								1806.55	1.08904								1806.55	4.39593
								1807.75	1.09353								1807.75	4.46664
								1808.96	1.09706								1808.96	4.48397
								1810.16	1.1068								1810.16	4.47223
								1811.36	1.10434								1811.36	4.4731
								1812.57	1.10303								1812.57	4.45257
								1813.77	1.11261								1813.77	4.39915
								1814.98	1.10778								1814.98	4.34428
								1816.18	1.11536								1816.18	4.2909
								1817.38	1.11723								1817.38	4.29228
								1818.59	1.11699								1818.59	4.30328
								1819.79	1.11385								1819.79	4.3488
								1820.99	1.11907								1820.99	4.36167
								1822.2	1.11414								1822.2	4.41589
								1823.4	1.1023								1823.4	4.45393
								1824.6	1.10602								1824.6	4.46303
								1825.8	1.10825								1825.8	4.46428
								1827.01	1.10638								1827.01	4.4264
								1828.21	1.10445								1828.21	4.40408
								1829.41	1.10176								1829.41	4.42675
								1830.61	1.09674								1830.61	4.41387
								1831.81	1.09777								1831.81	4.40138
								1833.01	1.10082								1833.01	4.40006
								1834.22	1.106								1834.22	4.40403
								1835.42	1.11333								1835.42	4.41333
								1836.62	1.1228								1836.62	4.42794
								1837.82	1.13442								1837.82	4.44786

[truncated: 7 more sheets: Figure 3F, Figure 5A, Figure 5B, Figure 5C, Figure 5D, Figure 6B, Figure 6C]
